# Supplementary material for: Investigation of Outbreak-Specific Nonsynonymous Mutations on Ebolavirus GP in the Context of Known Immune Reactivity
Source: J Immunol Res. 2018 Nov 15;2018:1846207. doi: 10.1155/2018/1846207 (PMC6276448; doi:10.1155/2018/1846207)
Supplement: Supplementary Materials — Table S1: list of all selected strain/variant names, accession IDs, GI numbers, percent match to consensus sequence and country, host, and date of isolation, if known. [file 1846207.f1.xlsx]

## Sheet: all_glycoproteins_nonCrystal
Query: (txid186536Organism AND (glycoproteinTitle or GPTitle or sGPTitle or ssGPTitle)) NOT srcdb pdbProperties
description	accession#	gi	length	country	collection_date	isolate
small secreted glycoprotein sGP Sudan ebolavirus.	ALT19780.1	965570406	372	Sudan	16-Oct-2000	Sudan virus/H. sapiens-tc/SDN/2000/Gulu-200011676
super small secreted glycoprotein SsGP Sudan ebolavirus.	ALT19779.1	965570405	319	Sudan	16-Oct-2000	Sudan virus/H. sapiens-tc/SDN/2000/Gulu-200011676
small secreted glycoprotein sGP Bundibugyo ebolavirus.	ALT19771.1	965570388	373	Uganda	14-Nov-2007	Bundibugyo virus/H. sapiens-tc/UGA/2007/Bundibugyo-200706291
super small secreted glycoprotein SsGP Bundibugyo ebolavirus.	ALT19770.1	965570387	303	Uganda	14-Nov-2007	Bundibugyo virus/H. sapiens-tc/UGA/2007/Bundibugyo-200706291
small secreted glycoprotein sGP Tai Forest ebolavirus.	ALT19762.1	965570373	365	Cote dIvoire	27-Nov-1994	Tai Forest virus/H. sapiens-tc/CIV/1994/Tai Forest-CDC807212
super small secreted glycoprotein SsGP Tai Forest ebolavirus.	ALT19761.1	965570372	303	Cote dIvoire	27-Nov-1994	Tai Forest virus/H. sapiens-tc/CIV/1994/Tai Forest-CDC807212
small secreted glycoprotein sGP Ebola virus.	ALT19753.1	965570358	364	Zaire	04-May-1995	Ebola virus/H. sapiens-tc/COD/1995/Kikwit-9510622
super small secreted glycoprotein SsGP Ebola virus.	ALT19752.1	965570357	298	Zaire	04-May-1995	Ebola virus/H. sapiens-tc/COD/1995/Kikwit-9510622
small secreted glycoprotein sGP Ebola virus.	ALT19744.1	965570346	364	Zaire	04-May-1995	Ebola virus/H. sapiens-tc/COD/1995/Kikwit-9510632
super small secreted glycoprotein SsGP Ebola virus.	ALT19743.1	965570345	298	Zaire	04-May-1995	Ebola virus/H. sapiens-tc/COD/1995/Kikwit-9510632
small secreted glycoprotein sGP Ebola virus.	ALT19735.1	965570335	364	Zaire	04-May-1995	Ebola virus/H. sapiens-tc/COD/1995/Kikwit-9510627
super small secreted glycoprotein SsGP Ebola virus.	ALT19734.1	965570334	298	Zaire	04-May-1995	Ebola virus/H. sapiens-tc/COD/1995/Kikwit-9510627
small secreted glycoprotein sGP Ebola virus.	ALT19726.1	965570324	364	Zaire	04-May-1995	Ebola virus/H. sapiens-tc/COD/1995/Kikwit-9510628
super small secreted glycoprotein SsGP Ebola virus.	ALT19725.1	965570323	298	Zaire	04-May-1995	Ebola virus/H. sapiens-tc/COD/1995/Kikwit-9510628
small secreted glycoprotein sGP Ebola virus.	ALT19717.1	965570313	364	Zaire	04-May-1995	Ebola virus/H. sapiens-tc/COD/1995/Kikwit-9510621
super small secreted glycoprotein SsGP Ebola virus.	ALT19716.1	965570312	298	Zaire	04-May-1995	Ebola virus/H. sapiens-tc/COD/1995/Kikwit-9510621
small secreted glycoprotein sGP Ebola virus.	ALT19708.1	965570301	364	Zaire	04-May-1995	Ebola virus/H. sapiens-tc/COD/1995/Kikwit-9510626
super small secreted glycoprotein SsGP Ebola virus.	ALT19707.1	965570300	298	Zaire	04-May-1995	Ebola virus/H. sapiens-tc/COD/1995/Kikwit-9510626
small secreted glycoprotein sGP Ebola virus.	ALT19699.1	965570290	364	Zaire	04-May-1995	Ebola virus/H. sapiens-tc/COD/1995/Kikwit-9510625
super small secreted glycoprotein SsGP Ebola virus.	ALT19698.1	965570289	298	Zaire	04-May-1995	Ebola virus/H. sapiens-tc/COD/1995/Kikwit-9510625
small secreted glycoprotein sGP Ebola virus.	ALT19690.1	965570278	364	Zaire	04-May-1995	Ebola virus/H. sapiens-tc/COD/1995/Kikwit-9510624
super small secreted glycoprotein SsGP Ebola virus.	ALT19689.1	965570277	298	Zaire	04-May-1995	Ebola virus/H. sapiens-tc/COD/1995/Kikwit-9510624
small secreted glycoprotein sGP Ebola virus.	ALT19681.1	965570266	364	Zaire	04-May-1995	Ebola virus/H. sapiens-tc/COD/1995/Kikwit-9510629
super small secreted glycoprotein SsGP Ebola virus.	ALT19680.1	965570265	298	Zaire	04-May-1995	Ebola virus/H. sapiens-tc/COD/1995/Kikwit-9510629
small secreted glycoprotein sGP Ebola virus.	ALT19672.1	965570255	364	Zaire	04-May-1995	Ebola virus/H. sapiens-tc/COD/1995/Kikwit-9510630
super small secreted glycoprotein SsGP Ebola virus.	ALT19671.1	965570254	298	Zaire	04-May-1995	Ebola virus/H. sapiens-tc/COD/1995/Kikwit-9510630
small secreted glycoprotein sGP Ebola virus.	ALT19663.1	965570244	364	Zaire	04-May-1995	Ebola virus/H. sapiens-tc/COD/1995/Kikwit-9510631
super small secreted glycoprotein SsGP Ebola virus.	ALT19662.1	965570243	298	Zaire	04-May-1995	Ebola virus/H. sapiens-tc/COD/1995/Kikwit-9510631
small secreted glycoprotein sGP Ebola virus.	ALT19654.1	965570226	364	Zaire	04-May-1995	Ebola virus/H. sapiens-tc/COD/1995/Kikwit-9510623
super small secreted glycoprotein SsGP Ebola virus.	ALT19653.1	965570225	298	Zaire	04-May-1995	Ebola virus/H. sapiens-tc/COD/1995/Kikwit-9510623
small secreted glycoprotein sGP Zaire ebolavirus.	AKI84275.1	824041266	364	Zaire: Kikwit	04-May-1995	Ebola virus/H.sapiens-tc/COD/1995/Kikwit-9510621
super small secreted glycoprotein SsGP Zaire ebolavirus.	AKI84274.1	824041265	298	Zaire: Kikwit	04-May-1995	Ebola virus/H.sapiens-tc/COD/1995/Kikwit-9510621
small secreted glycoprotein sGP Bundibugyo ebolavirus.	AKB09564.1	803773910	373	Uganda	01-Oct-2007	Bundibugyo virus/H.sapiens-tc/UGA/2007/Butalya-811250
super small secreted glycoprotein SsGP Bundibugyo ebolavirus.	AKB09563.1	803773909	303	Uganda	01-Oct-2007	Bundibugyo virus/H.sapiens-tc/UGA/2007/Butalya-811250
small secreted glycoprotein sGP Ebola virus.	AKB09555.1	803773887	364	Democratic Republic of the Congo	01-Apr-1995	Ebola virus/H.sapiens-tc/COD/1995/Kikwit-807223
super small secreted glycoprotein SsGP Ebola virus.	AKB09554.1	803773886	298	Democratic Republic of the Congo	01-Apr-1995	Ebola virus/H.sapiens-tc/COD/1995/Kikwit-807223
small secreted glycoprotein sGP Ebola virus.	AKB09546.1	803773863	364	Democratic Republic of the Congo	01-Oct-1976	Ebola virus/H.sapiens-tc/COD/1976/Yambuku-Mayinga
super small secreted glycoprotein SsGP Ebola virus.	AKB09545.1	803773862	298	Democratic Republic of the Congo	01-Oct-1976	Ebola virus/H.sapiens-tc/COD/1976/Yambuku-Mayinga
small secreted glycoprotein sGP Sudan ebolavirus.	AKB09537.1	803773833	372	Uganda	01-Oct-2000	Ebola virus/H.sapiens-tc/UGA/2000/Gulu-808892
super small secreted glycoprotein SsGP Sudan ebolavirus.	AKB09536.1	803773832	319	Uganda	01-Oct-2000	Ebola virus/H.sapiens-tc/UGA/2000/Gulu-808892
secreted glycoprotein sGP Zaire ebolavirus.	AAN37508.1	23630487	364	N/A	N/A	N/A
surface glycoprotein GP Zaire ebolavirus.	AAN37507.1	23630486	676	N/A	N/A	N/A
small non-structural, secreted glycoprotein sGP precursor Zaire ebolavirus.	AAM76035.1	21702652	364	N/A	N/A	N/A
surface glycoprotein GP precursor Zaire ebolavirus.	AAM76034.1	21702651	676	N/A	N/A	N/A
surface glycoprotein GP Zaire ebolavirus.	AAG40168.1	11761750	676	N/A	N/A	N/A
small non-structural, secreted glycoprotein sGP Zaire ebolavirus.	AAG40167.1	11761749	364	N/A	N/A	N/A
small secreted non-structural glycoprotein sGP Zaire ebolavirus.	AAC57993.1	1753172	364	N/A	N/A	N/A
RecName: Full=Envelope glycoprotein; AltName: Full=GP1,2; Short=GP; Contains: RecName: Full=GP1; Contains: RecName: Full=GP2; Contains: RecName: Full=GP2-delta; Flags: Precursor.	Q91DD8.1	81961763	677	N/A	N/A	N/A
RecName: Full=Pre-small/secreted glycoprotein; Short=pre-sGP; Contains: RecName: Full=Small/secreted glycoprotein; Short=sGP; Contains: RecName: Full=Delta-peptide; Flags: Precursor.	Q91DD7.1	81961762	367	N/A	N/A	N/A
RecName: Full=Pre-small/secreted glycoprotein; Short=pre-sGP; Contains: RecName: Full=Small/secreted glycoprotein; Short=sGP; Contains: RecName: Full=Delta-peptide; Flags: Precursor.	Q7T9E0.1	75559167	372	N/A	N/A	N/A
RecName: Full=Envelope glycoprotein; AltName: Full=GP1,2; Short=GP; Contains: RecName: Full=GP1; Contains: RecName: Full=GP2; Contains: RecName: Full=GP2-delta; Flags: Precursor.	Q7T9D9.1	75559166	676	N/A	N/A	N/A
RecName: Full=Pre-small/secreted glycoprotein; Short=pre-sGP; Contains: RecName: Full=Small/secreted glycoprotein; Short=sGP; Contains: RecName: Full=Delta-peptide; Flags: Precursor.	P60173.1	39932660	372	N/A	N/A	N/A
RecName: Full=Pre-small/secreted glycoprotein; Short=pre-sGP; Contains: RecName: Full=Small/secreted glycoprotein; Short=sGP; Contains: RecName: Full=Delta-peptide; Flags: Precursor.	P60172.1	39932659	372	N/A	N/A	N/A
RecName: Full=Pre-small/secreted glycoprotein; Short=pre-sGP; Contains: RecName: Full=Small/secreted glycoprotein; Short=sGP; Contains: RecName: Full=Delta-peptide; Flags: Precursor.	P60171.1	39932658	364	N/A	N/A	N/A
RecName: Full=Pre-small/secreted glycoprotein; Short=pre-sGP; Contains: RecName: Full=Small/secreted glycoprotein; Short=sGP; Contains: RecName: Full=Delta-peptide; Flags: Precursor.	P60170.1	39932657	364	N/A	N/A	N/A
RecName: Full=Pre-small/secreted glycoprotein; Short=pre-sGP; Contains: RecName: Full=Small/secreted glycoprotein; Short=sGP; Contains: RecName: Full=Delta-peptide; Flags: Precursor.	Q89569.1	8928473	367	N/A	N/A	N/A
RecName: Full=Pre-small/secreted glycoprotein; Short=pre-sGP; Contains: RecName: Full=Small/secreted glycoprotein; Short=sGP; Contains: RecName: Full=Delta-peptide; Flags: Precursor.	Q66811.1	8928470	365	N/A	N/A	N/A
RecName: Full=Pre-small/secreted glycoprotein; Short=pre-sGP; Contains: RecName: Full=Small/secreted glycoprotein; Short=sGP; Contains: RecName: Full=Delta-peptide; Flags: Precursor.	Q66800.1	8928469	367	N/A	N/A	N/A
RecName: Full=Pre-small/secreted glycoprotein; Short=pre-sGP; Contains: RecName: Full=Small/secreted glycoprotein; Short=sGP; Contains: RecName: Full=Delta-peptide; Flags: Precursor.	P87670.1	8928464	364	N/A	N/A	N/A
RecName: Full=Pre-small/secreted glycoprotein; Short=pre-sGP; Contains: RecName: Full=Small/secreted glycoprotein; Short=sGP; Contains: RecName: Full=Delta-peptide; Flags: Precursor.	O11458.1	8928451	364	N/A	N/A	N/A
RecName: Full=Envelope glycoprotein; AltName: Full=GP1,2; Short=GP; Contains: RecName: Full=GP1; Contains: RecName: Full=GP2; Contains: RecName: Full=GP2-delta; Flags: Precursor.	Q89853.1	8479518	677	N/A	N/A	N/A
RecName: Full=Envelope glycoprotein; AltName: Full=GP1,2; Short=GP; Contains: RecName: Full=GP1; Contains: RecName: Full=GP2; Contains: RecName: Full=GP2-delta; Flags: Precursor.	Q66814.1	8479515	676	N/A	N/A	N/A
RecName: Full=Envelope glycoprotein; AltName: Full=GP1,2; Short=GP; Contains: RecName: Full=GP1; Contains: RecName: Full=GP2; Contains: RecName: Full=GP2-delta; Flags: Precursor.	Q66810.1	8479513	676	N/A	N/A	N/A
RecName: Full=Envelope glycoprotein; AltName: Full=GP1,2; Short=GP; Contains: RecName: Full=GP1; Contains: RecName: Full=GP2; Contains: RecName: Full=GP2-delta; Flags: Precursor.	Q66799.1	8479511	677	N/A	N/A	N/A
RecName: Full=Envelope glycoprotein; AltName: Full=GP1,2; Short=GP; Contains: RecName: Full=GP1; Contains: RecName: Full=GP2; Contains: RecName: Full=GP2-delta; Flags: Precursor.	Q66798.1	8479509	676	N/A	N/A	N/A
RecName: Full=Envelope glycoprotein; AltName: Full=GP1,2; Short=GP; Contains: RecName: Full=GP1; Contains: RecName: Full=GP2; Contains: RecName: Full=GP2-delta; Flags: Precursor.	P87671.1	8479505	676	N/A	N/A	N/A
RecName: Full=Envelope glycoprotein; AltName: Full=GP1,2; Short=GP; Contains: RecName: Full=GP1; Contains: RecName: Full=GP2; Contains: RecName: Full=GP2-delta; Flags: Precursor.	P87666.1	8479503	676	N/A	N/A	N/A
RecName: Full=Envelope glycoprotein; AltName: Full=GP1,2; Short=GP; Contains: RecName: Full=GP1; Contains: RecName: Full=GP2; Contains: RecName: Full=GP2-delta; Flags: Precursor.	O11457.1	8479501	676	N/A	N/A	N/A
RecName: Full=Envelope glycoprotein; AltName: Full=GP1,2; Short=GP; Contains: RecName: Full=GP1; Contains: RecName: Full=GP2; Contains: RecName: Full=GP2-delta; Flags: Precursor.	Q05320.1	465411	676	N/A	N/A	N/A
ssGP Ebola virus.	SCD11536.1	1050758572	297	N/A	N/A	Ebola virus Makona isolate Frankfurt
sGP Ebola virus.	SCD11535.1	1050758571	364	N/A	N/A	Ebola virus Makona isolate Frankfurt
virion spike glycoprotein precursor Ebola virus.	SCD11534.1	1050758570	676	N/A	N/A	Ebola virus Makona isolate Frankfurt
spike glycoprotein precursor, partial Zaire ebolavirus.	ABW34746.1	158341872	180	Gabon	Jun-2005	N/A
spike glycoprotein precursor, partial Zaire ebolavirus.	ABW34745.1	158341870	180	Gabon	Jun-2005	N/A
spike glycoprotein precursor, partial Zaire ebolavirus.	ABW34744.1	158341868	180	Gabon	Jun-2003	N/A
spike glycoprotein precursor Zaire ebolavirus.	ABW34743.1	158341866	676	Gabon	Nov-2003	N/A
spike glycoprotein precursor Zaire ebolavirus.	ABW34742.1	158341864	676	Gabon	May-2005	N/A
spike glycoprotein precursor Zaire ebolavirus.	ABW34741.1	158341862	676	Gabon	Feb-2003	N/A
spike glycoprotein precursor Zaire ebolavirus.	ABW34740.1	158341860	676	Gabon	Nov-2001	N/A
spike glycoprotein precursor Zaire ebolavirus.	ABW34739.1	158341858	676	Gabon	Dec-2002	N/A
spike glycoprotein precursor Zaire ebolavirus.	ABW34738.1	158341856	676	Gabon	Dec-2002	N/A
glycoprotein Zaire ebolavirus.	AAB81004.1	290392	676	N/A	N/A	N/A
nonstructural soluble secreted glycoprotein Sudan ebolavirus.	ALL26376.1	942473147	372	Canada	01-Mar-2015	Sudan virus/C.porcellus-lab/SSD/1976/Nzara-Boneface
structural glycoprotein Sudan ebolavirus.	ALL26375.1	942473146	676	Canada	01-Mar-2015	Sudan virus/C.porcellus-lab/SSD/1976/Nzara-Boneface
nonstructural soluble secreted glycoprotein Sudan ebolavirus.	ALH21229.1	936345351	372	N/A	N/A	Boniface
structural glycoprotein Sudan ebolavirus.	ALH21228.1	936345350	676	N/A	N/A	Boniface
ssGP Zaire ebolavirus.	ALB07146.1	923091291	297	Liberia	05-Sep-2014	Ebola virus H.sapiens-wt/LBR/2015/CDC659
sGP Zaire ebolavirus.	ALB07145.1	923091290	364	Liberia	05-Sep-2014	Ebola virus H.sapiens-wt/LBR/2015/CDC659
virion spike glycoprotein precursor Zaire ebolavirus.	ALB07144.1	923091289	676	Liberia	05-Sep-2014	Ebola virus H.sapiens-wt/LBR/2015/CDC659
ssGP Zaire ebolavirus.	ALB07137.1	923091281	297	Liberia	24-Sep-2014	Ebola virus H.sapiens-wt/LBR/2015/CDC1469
sGP Zaire ebolavirus.	ALB07136.1	923091280	364	Liberia	24-Sep-2014	Ebola virus H.sapiens-wt/LBR/2015/CDC1469
virion spike glycoprotein precursor Zaire ebolavirus.	ALB07135.1	923091279	676	Liberia	24-Sep-2014	Ebola virus H.sapiens-wt/LBR/2015/CDC1469
ssGP Zaire ebolavirus.	ALB07128.1	923091271	297	Liberia	27-Mar-2015	Ebola virus H.sapiens-wt/LBR/2015/MH2012684
sGP Zaire ebolavirus.	ALB07127.1	923091270	364	Liberia	27-Mar-2015	Ebola virus H.sapiens-wt/LBR/2015/MH2012684
virion spike glycoprotein precursor Zaire ebolavirus.	ALB07126.1	923091269	676	Liberia	27-Mar-2015	Ebola virus H.sapiens-wt/LBR/2015/MH2012684
ssGP Zaire ebolavirus.	ALB07119.1	923091261	297	Liberia	20-Mar-2015	Ebola virus H.sapiens-wt/LBR/2015/MH13203
sGP Zaire ebolavirus.	ALB07118.1	923091260	364	Liberia	20-Mar-2015	Ebola virus H.sapiens-wt/LBR/2015/MH13203
virion spike glycoprotein precursor Zaire ebolavirus.	ALB07117.1	923091259	676	Liberia	20-Mar-2015	Ebola virus H.sapiens-wt/LBR/2015/MH13203
ssGP Zaire ebolavirus.	AND81235.1	1027251921	297	Guinea: Kindia	18-Apr-2015	Ebola virus/H.sapiens/GIN/2015/Makona-Kindia1022
sGP Zaire ebolavirus.	AND81234.1	1027251920	364	Guinea: Kindia	18-Apr-2015	Ebola virus/H.sapiens/GIN/2015/Makona-Kindia1022
virion spike glycoprotein precursor Zaire ebolavirus.	AND81233.1	1027251919	676	Guinea: Kindia	18-Apr-2015	Ebola virus/H.sapiens/GIN/2015/Makona-Kindia1022
sGP Zaire ebolavirus.	AND81226.1	1027251911	364	Guinea: Kindia	04-Apr-2015	Ebola virus/H.sapiens/GIN/2015/Makona-Kindia935
ssGP Zaire ebolavirus.	AND81225.1	1027251910	297	Guinea: Kindia	04-Apr-2015	Ebola virus/H.sapiens/GIN/2015/Makona-Kindia935
virion spike glycoprotein precursor Zaire ebolavirus.	AND81224.1	1027251909	676	Guinea: Kindia	04-Apr-2015	Ebola virus/H.sapiens/GIN/2015/Makona-Kindia935
sGP Zaire ebolavirus.	AND81217.1	1027251901	364	Guinea: Forecaria	02-Mar-2015	Ebola virus/H.sapiens/GIN/2015/Makona-Forecaria856
ssGP Zaire ebolavirus.	AND81216.1	1027251900	297	Guinea: Forecaria	02-Mar-2015	Ebola virus/H.sapiens/GIN/2015/Makona-Forecaria856
virion spike glycoprotein precursor Zaire ebolavirus.	AND81215.1	1027251899	676	Guinea: Forecaria	02-Mar-2015	Ebola virus/H.sapiens/GIN/2015/Makona-Forecaria856
sGP Zaire ebolavirus.	AND81208.1	1027251891	364	Guinea: Kindia	23-Dec-2014	Ebola virus/H.sapiens/GIN/2014/Makona-Kindia683
ssGP Zaire ebolavirus.	AND81207.1	1027251890	297	Guinea: Kindia	23-Dec-2014	Ebola virus/H.sapiens/GIN/2014/Makona-Kindia683
virion spike glycoprotein precursor Zaire ebolavirus.	AND81206.1	1027251889	676	Guinea: Kindia	23-Dec-2014	Ebola virus/H.sapiens/GIN/2014/Makona-Kindia683
sGP Zaire ebolavirus.	AND81199.1	1027251881	364	Guinea: Kindia	04-Nov-2014	Ebola virus/H.sapiens/GIN/2014/Makona-Kindia326
ssGP Zaire ebolavirus.	AND81198.1	1027251880	297	Guinea: Kindia	04-Nov-2014	Ebola virus/H.sapiens/GIN/2014/Makona-Kindia326
virion spike glycoprotein precursor Zaire ebolavirus.	AND81197.1	1027251879	676	Guinea: Kindia	04-Nov-2014	Ebola virus/H.sapiens/GIN/2014/Makona-Kindia326
sGP Zaire ebolavirus.	AND81190.1	1027251871	364	Guinea: Conakry	02-Nov-2014	Ebola virus/H.sapiens/GIN/2014/Makona-Conakry317
ssGP Zaire ebolavirus.	AND81189.1	1027251870	297	Guinea: Conakry	02-Nov-2014	Ebola virus/H.sapiens/GIN/2014/Makona-Conakry317
virion spike glycoprotein precursor Zaire ebolavirus.	AND81188.1	1027251869	676	Guinea: Conakry	02-Nov-2014	Ebola virus/H.sapiens/GIN/2014/Makona-Conakry317
ssGP Zaire ebolavirus.	AND81092.1	1027251705	297	Sierra Leone	20-Jan-2016	Ebola virus/H.sapiens-wt/SLE/2016/Makona-2001_C11_KTO14515
sGP Zaire ebolavirus.	AND81091.1	1027251704	364	Sierra Leone	20-Jan-2016	Ebola virus/H.sapiens-wt/SLE/2016/Makona-2001_C11_KTO14515
virion spike glycoprotein precursor Zaire ebolavirus.	AND81090.1	1027251703	676	Sierra Leone	20-Jan-2016	Ebola virus/H.sapiens-wt/SLE/2016/Makona-2001_C11_KTO14515
ssGP Zaire ebolavirus.	AND81083.1	1027251695	297	Sierra Leone	12-Jan-2016	Ebola virus/H.sapiens-wt/SLE/2016/Makona-1601_C12_KT014149
sGP Zaire ebolavirus.	AND81082.1	1027251694	364	Sierra Leone	12-Jan-2016	Ebola virus/H.sapiens-wt/SLE/2016/Makona-1601_C12_KT014149
virion spike glycoprotein precursor Zaire ebolavirus.	AND81081.1	1027251693	676	Sierra Leone	12-Jan-2016	Ebola virus/H.sapiens-wt/SLE/2016/Makona-1601_C12_KT014149
second secreted glycoprotein Reston ebolavirus.	YP_009246340.1	1021000625	331	N/A	N/A	Reston virus/M.fascicularis-tc/USA/1989/Philippines89- Pennsylvania
spike glycoprotein Reston ebolavirus.	NP_690583.1	22789230	677	N/A	N/A	Reston virus/M.fascicularis-tc/USA/1989/Philippines89- Pennsylvania
small secreted glycoprotein Reston ebolavirus.	NP_690584.1	22789226	367	N/A	N/A	Reston virus/M.fascicularis-tc/USA/1989/Philippines89- Pennsylvania
second secreted glycoprotein Sudan ebolavirus.	YP_009246341.1	1021000626	318	Uganda	N/A	Sudan virus/H.sapiens-tc/UGA/2000/Gulu-808892
ssGP Zaire ebolavirus.	AMY60356.1	1018445887	297	Nigeria: Lagos	22-Jul-2014	Ebola virus/H.sapiens-wt/NGA/2014/Makona-E001
sGP Zaire ebolavirus.	AMY60355.1	1018445886	364	Nigeria: Lagos	22-Jul-2014	Ebola virus/H.sapiens-wt/NGA/2014/Makona-E001
virion spike glycoprotein precursor Zaire ebolavirus.	AMY60354.1	1018445885	676	Nigeria: Lagos	22-Jul-2014	Ebola virus/H.sapiens-wt/NGA/2014/Makona-E001
ssGP, partial Zaire ebolavirus.	AMY60347.1	1018445877	262	Nigeria: Lagos	08-Aug-2014	Ebola virus/H.sapiens-wt/NGA/2014/Makona-E039
sGP Zaire ebolavirus.	AMY60346.1	1018445876	364	Nigeria: Lagos	08-Aug-2014	Ebola virus/H.sapiens-wt/NGA/2014/Makona-E039
virion spike glycoprotein precursor Zaire ebolavirus.	AMY60345.1	1018445875	676	Nigeria: Lagos	08-Aug-2014	Ebola virus/H.sapiens-wt/NGA/2014/Makona-E039
ssGP Zaire ebolavirus.	AMY60338.1	1018445867	297	Nigeria: Lagos	04-Aug-2014	Ebola virus/H.sapiens-wt/NGA/2014/Makona-E021
sGP Zaire ebolavirus.	AMY60337.1	1018445866	364	Nigeria: Lagos	04-Aug-2014	Ebola virus/H.sapiens-wt/NGA/2014/Makona-E021
virion spike glycoprotein precursor Zaire ebolavirus.	AMY60336.1	1018445865	676	Nigeria: Lagos	04-Aug-2014	Ebola virus/H.sapiens-wt/NGA/2014/Makona-E021
ssGP Zaire ebolavirus.	AMY60329.1	1018445857	297	Nigeria: Lagos	06-Aug-2014	Ebola virus/H.sapiens-wt/NGA/2014/Makona-E027
sGP Zaire ebolavirus.	AMY60328.1	1018445856	364	Nigeria: Lagos	06-Aug-2014	Ebola virus/H.sapiens-wt/NGA/2014/Makona-E027
virion spike glycoprotein precursor Zaire ebolavirus.	AMY60327.1	1018445855	676	Nigeria: Lagos	06-Aug-2014	Ebola virus/H.sapiens-wt/NGA/2014/Makona-E027
ssGP Zaire ebolavirus.	AMY60320.1	1018445847	297	Nigeria: Lagos	05-Aug-2014	Ebola virus/H.sapiens-wt/NGA/2014/Makona-E023
sGP Zaire ebolavirus.	AMY60319.1	1018445846	364	Nigeria: Lagos	05-Aug-2014	Ebola virus/H.sapiens-wt/NGA/2014/Makona-E023
virion spike glycoprotein precursor Zaire ebolavirus.	AMY60318.1	1018445845	676	Nigeria: Lagos	05-Aug-2014	Ebola virus/H.sapiens-wt/NGA/2014/Makona-E023
ssGP Zaire ebolavirus.	AMY60311.1	1018445837	297	Nigeria: Lagos	15-Aug-2014	Ebola virus/H.sapiens-wt/NGA/2014/Makona-E076
sGP Zaire ebolavirus.	AMY60310.1	1018445836	364	Nigeria: Lagos	15-Aug-2014	Ebola virus/H.sapiens-wt/NGA/2014/Makona-E076
virion spike glycoprotein precursor Zaire ebolavirus.	AMY60309.1	1018445835	676	Nigeria: Lagos	15-Aug-2014	Ebola virus/H.sapiens-wt/NGA/2014/Makona-E076
ssGP Zaire ebolavirus.	AMY60302.1	1018445827	297	Nigeria: Port Harcourt	01-Sep-2014	Ebola virus/H.sapiens-wt/NGA/2014/Makona-E130
sGP Zaire ebolavirus.	AMY60301.1	1018445826	364	Nigeria: Port Harcourt	01-Sep-2014	Ebola virus/H.sapiens-wt/NGA/2014/Makona-E130
virion spike glycoprotein precursor Zaire ebolavirus.	AMY60300.1	1018445825	676	Nigeria: Port Harcourt	01-Sep-2014	Ebola virus/H.sapiens-wt/NGA/2014/Makona-E130
ssGP Zaire ebolavirus.	AMY60293.1	1018445817	297	Nigeria: Lagos	06-Aug-2014	Ebola virus/H.sapiens-wt/NGA/2014/Makona-E030
sGP Zaire ebolavirus.	AMY60292.1	1018445816	364	Nigeria: Lagos	06-Aug-2014	Ebola virus/H.sapiens-wt/NGA/2014/Makona-E030
virion spike glycoprotein precursor Zaire ebolavirus.	AMY60291.1	1018445815	676	Nigeria: Lagos	06-Aug-2014	Ebola virus/H.sapiens-wt/NGA/2014/Makona-E030
ssGP Zaire ebolavirus.	AMY60284.1	1018445807	297	Nigeria: Lagos	06-Aug-2014	Ebola virus/H.sapiens-wt/NGA/2014/Makona-E029
sGP Zaire ebolavirus.	AMY60283.1	1018445806	364	Nigeria: Lagos	06-Aug-2014	Ebola virus/H.sapiens-wt/NGA/2014/Makona-E029
virion spike glycoprotein precursor Zaire ebolavirus.	AMY60282.1	1018445805	676	Nigeria: Lagos	06-Aug-2014	Ebola virus/H.sapiens-wt/NGA/2014/Makona-E029
ssGP Zaire ebolavirus.	AMY60275.1	1018445797	297	Nigeria: Lagos	04-Aug-2014	Ebola virus/H.sapiens-wt/NGA/2014/Makona-E020
sGP Zaire ebolavirus.	AMY60274.1	1018445796	364	Nigeria: Lagos	04-Aug-2014	Ebola virus/H.sapiens-wt/NGA/2014/Makona-E020
virion spike glycoprotein precursor Zaire ebolavirus.	AMY60273.1	1018445795	676	Nigeria: Lagos	04-Aug-2014	Ebola virus/H.sapiens-wt/NGA/2014/Makona-E020
ssGP Zaire ebolavirus.	AMY60266.1	1018445787	297	Nigeria: Lagos	05-Aug-2014	Ebola virus/H.sapiens-wt/NGA/2014/Makona-E024
sGP Zaire ebolavirus.	AMY60265.1	1018445786	364	Nigeria: Lagos	05-Aug-2014	Ebola virus/H.sapiens-wt/NGA/2014/Makona-E024
virion spike glycoprotein precursor Zaire ebolavirus.	AMY60264.1	1018445785	676	Nigeria: Lagos	05-Aug-2014	Ebola virus/H.sapiens-wt/NGA/2014/Makona-E024
ssGP Zaire ebolavirus.	AMY60257.1	1018445777	297	Nigeria: Lagos	06-Aug-2014	Ebola virus/H.sapiens-wt/NGA/2014/Makona-E033
sGP Zaire ebolavirus.	AMY60256.1	1018445776	364	Nigeria: Lagos	06-Aug-2014	Ebola virus/H.sapiens-wt/NGA/2014/Makona-E033
virion spike glycoprotein precursor Zaire ebolavirus.	AMY60255.1	1018445775	676	Nigeria: Lagos	06-Aug-2014	Ebola virus/H.sapiens-wt/NGA/2014/Makona-E033
second secreted glycoprotein Bundibugyo ebolavirus.	YP_003815437.1	302371222	302	Uganda	Nov-2007	Bundibugyo virus/H.sapiens-tc/UGA/2007/Butalya-811250
spike glycoprotein Bundibugyo ebolavirus.	YP_003815435.1	302371218	676	Uganda	Nov-2007	Bundibugyo virus/H.sapiens-tc/UGA/2007/Butalya-811250
small secreted glycoprotein Bundibugyo ebolavirus.	YP_003815436.1	302371217	373	Uganda	Nov-2007	Bundibugyo virus/H.sapiens-tc/UGA/2007/Butalya-811250
second secreted glycoprotein Tai Forest ebolavirus.	YP_003815428.1	302315378	302	Cote dIvoire	Nov-1994	Tai Forest virus/H.sapiens-tc/CIV/1994/Pauleoula-CI
small secreted glycoprotein Tai Forest ebolavirus.	YP_003815427.1	302315374	365	Cote dIvoire	Nov-1994	Tai Forest virus/H.sapiens-tc/CIV/1994/Pauleoula-CI
spike glycoprotein Tai Forest ebolavirus.	YP_003815426.1	302315373	676	Cote dIvoire	Nov-1994	Tai Forest virus/H.sapiens-tc/CIV/1994/Pauleoula-CI
spike glycoprotein Sudan ebolavirus.	YP_138523.1	55770812	676	Uganda	N/A	Sudan virus/H.sapiens-tc/UGA/2000/Gulu-808892
small secreted glycoprotein Sudan ebolavirus.	YP_138524.1	55770811	372	Uganda	N/A	Sudan virus/H.sapiens-tc/UGA/2000/Gulu-808892
second secreted glycoprotein Zaire ebolavirus.	NP_066248.1	10313996	297	N/A	N/A	Ebola virus/H.sapiens-tc/COD/1976/Yambuku-Mayinga
spike glycoprotein Zaire ebolavirus.	NP_066246.1	10313995	676	N/A	N/A	Ebola virus/H.sapiens-tc/COD/1976/Yambuku-Mayinga
small secreted glycoprotein Zaire ebolavirus.	NP_066247.1	10313994	364	N/A	N/A	Ebola virus/H.sapiens-tc/COD/1976/Yambuku-Mayinga
ssGP Zaire ebolavirus.	ALT66796.1	968561633	297	Liberia: Montserrado	16-Jan-2015	Ebola virus/H.sapiens-wt/LBR/2015/Makona-NIH-4731
sGP Zaire ebolavirus.	ALT66795.1	968561632	364	Liberia: Montserrado	16-Jan-2015	Ebola virus/H.sapiens-wt/LBR/2015/Makona-NIH-4731
virion spike glycoprotein precursor Zaire ebolavirus.	ALT66794.1	968561631	676	Liberia: Montserrado	16-Jan-2015	Ebola virus/H.sapiens-wt/LBR/2015/Makona-NIH-4731
ssGP Zaire ebolavirus.	ALT66787.1	968561623	297	Liberia: Montserrado	30-Dec-2014	Ebola virus/H.sapiens-wt/LBR/2014/Makona-NIH-4547
sGP Zaire ebolavirus.	ALT66786.1	968561622	364	Liberia: Montserrado	30-Dec-2014	Ebola virus/H.sapiens-wt/LBR/2014/Makona-NIH-4547
virion spike glycoprotein precursor Zaire ebolavirus.	ALT66785.1	968561621	676	Liberia: Montserrado	30-Dec-2014	Ebola virus/H.sapiens-wt/LBR/2014/Makona-NIH-4547
ssGP Zaire ebolavirus.	ALT66778.1	968561613	297	Liberia: Barclay Farm, Margibi	25-Aug-2014	Ebola virus/H.sapiens-wt/LBR/2014/Makona-LIBR20006
sGP Zaire ebolavirus.	ALT66777.1	968561612	364	Liberia: Barclay Farm, Margibi	25-Aug-2014	Ebola virus/H.sapiens-wt/LBR/2014/Makona-LIBR20006
virion spike glycoprotein precursor Zaire ebolavirus.	ALT66776.1	968561611	676	Liberia: Barclay Farm, Margibi	25-Aug-2014	Ebola virus/H.sapiens-wt/LBR/2014/Makona-LIBR20006
ssGP Zaire ebolavirus.	ALT66769.1	968561603	297	Liberia: Barclay Farm, Margibi	25-Aug-2014	Ebola virus/H.sapiens-wt/LBR/2014/Makona-LIBR20005
sGP Zaire ebolavirus.	ALT66768.1	968561602	364	Liberia: Barclay Farm, Margibi	25-Aug-2014	Ebola virus/H.sapiens-wt/LBR/2014/Makona-LIBR20005
virion spike glycoprotein precursor Zaire ebolavirus.	ALT66767.1	968561601	676	Liberia: Barclay Farm, Margibi	25-Aug-2014	Ebola virus/H.sapiens-wt/LBR/2014/Makona-LIBR20005
ssGP Zaire ebolavirus.	ALT66760.1	968561593	297	Liberia: Barclay Farm, Margibi	24-Aug-2014	Ebola virus/H.sapiens-wt/LBR/2014/Makona-LIBR20004
sGP Zaire ebolavirus.	ALT66759.1	968561592	364	Liberia: Barclay Farm, Margibi	24-Aug-2014	Ebola virus/H.sapiens-wt/LBR/2014/Makona-LIBR20004
virion spike glycoprotein precursor Zaire ebolavirus.	ALT66758.1	968561591	676	Liberia: Barclay Farm, Margibi	24-Aug-2014	Ebola virus/H.sapiens-wt/LBR/2014/Makona-LIBR20004
ssGP Zaire ebolavirus.	ALT66751.1	968561583	297	Liberia: Barclay Farm, Margibi	24-Aug-2014	Ebola virus/H.sapiens-wt/LBR/2014/Makona-LIBR20003
sGP Zaire ebolavirus.	ALT66750.1	968561582	364	Liberia: Barclay Farm, Margibi	24-Aug-2014	Ebola virus/H.sapiens-wt/LBR/2014/Makona-LIBR20003
virion spike glycoprotein precursor Zaire ebolavirus.	ALT66749.1	968561581	676	Liberia: Barclay Farm, Margibi	24-Aug-2014	Ebola virus/H.sapiens-wt/LBR/2014/Makona-LIBR20003
ssGP Zaire ebolavirus.	ALT66742.1	968561573	297	Liberia: Barclay Farm, Margibi	24-Aug-2014	Ebola virus/H.sapiens-wt/LBR/2014/Makona-LIBR20002
sGP Zaire ebolavirus.	ALT66741.1	968561572	364	Liberia: Barclay Farm, Margibi	24-Aug-2014	Ebola virus/H.sapiens-wt/LBR/2014/Makona-LIBR20002
virion spike glycoprotein precursor Zaire ebolavirus.	ALT66740.1	968561571	676	Liberia: Barclay Farm, Margibi	24-Aug-2014	Ebola virus/H.sapiens-wt/LBR/2014/Makona-LIBR20002
ssGP Zaire ebolavirus.	ALT66733.1	968561563	297	Liberia: Barclay Farm, Margibi	10-Aug-2014	Ebola virus/H.sapiens-wt/LBR/2014/Makona-LIBR20001
sGP Zaire ebolavirus.	ALT66732.1	968561562	364	Liberia: Barclay Farm, Margibi	10-Aug-2014	Ebola virus/H.sapiens-wt/LBR/2014/Makona-LIBR20001
virion spike glycoprotein precursor Zaire ebolavirus.	ALT66731.1	968561561	676	Liberia: Barclay Farm, Margibi	10-Aug-2014	Ebola virus/H.sapiens-wt/LBR/2014/Makona-LIBR20001
ssGP Zaire ebolavirus.	ALT66724.1	968561553	297	Liberia: Montserrado	12-Jul-2015	Ebola virus/H.sapiens-wt/LBR/2015/Makona-LIBR5307
sGP Zaire ebolavirus.	ALT66723.1	968561552	364	Liberia: Montserrado	12-Jul-2015	Ebola virus/H.sapiens-wt/LBR/2015/Makona-LIBR5307
virion spike glycoprotein precursor Zaire ebolavirus.	ALT66722.1	968561551	676	Liberia: Montserrado	12-Jul-2015	Ebola virus/H.sapiens-wt/LBR/2015/Makona-LIBR5307
ssGP Zaire ebolavirus.	ALT66715.1	968561543	297	Liberia: Needowein, Margibi	08-Jul-2015	Ebola virus/H.sapiens-wt/LBR/2015/Makona-LIBR5081
sGP Zaire ebolavirus.	ALT66714.1	968561542	364	Liberia: Needowein, Margibi	08-Jul-2015	Ebola virus/H.sapiens-wt/LBR/2015/Makona-LIBR5081
virion spike glycoprotein precursor Zaire ebolavirus.	ALT66713.1	968561541	676	Liberia: Needowein, Margibi	08-Jul-2015	Ebola virus/H.sapiens-wt/LBR/2015/Makona-LIBR5081
ssGP Zaire ebolavirus.	ALT66706.1	968561533	297	Liberia: Needowein, Margibi	07-Jul-2015	Ebola virus/H.sapiens-wt/LBR/2015/Makona-LIBR5047
sGP Zaire ebolavirus.	ALT66705.1	968561532	364	Liberia: Needowein, Margibi	07-Jul-2015	Ebola virus/H.sapiens-wt/LBR/2015/Makona-LIBR5047
virion spike glycoprotein precursor Zaire ebolavirus.	ALT66704.1	968561531	676	Liberia: Needowein, Margibi	07-Jul-2015	Ebola virus/H.sapiens-wt/LBR/2015/Makona-LIBR5047
ssGP Zaire ebolavirus.	ALT66697.1	968561523	297	Liberia: Needowein, Margibi	07-Jul-2015	Ebola virus/H.sapiens-wt/LBR/2015/Makona-LIBR5046
sGP Zaire ebolavirus.	ALT66696.1	968561522	364	Liberia: Needowein, Margibi	07-Jul-2015	Ebola virus/H.sapiens-wt/LBR/2015/Makona-LIBR5046
virion spike glycoprotein precursor Zaire ebolavirus.	ALT66695.1	968561521	676	Liberia: Needowein, Margibi	07-Jul-2015	Ebola virus/H.sapiens-wt/LBR/2015/Makona-LIBR5046
ssGP Zaire ebolavirus.	ALT66688.1	968561513	297	Liberia: Needowein, Margibi	02-Jul-2015	Ebola virus/H.sapiens-wt/LBR/2015/Makona-LIBR4866
sGP Zaire ebolavirus.	ALT66687.1	968561512	364	Liberia: Needowein, Margibi	02-Jul-2015	Ebola virus/H.sapiens-wt/LBR/2015/Makona-LIBR4866
virion spike glycoprotein precursor Zaire ebolavirus.	ALT66686.1	968561511	676	Liberia: Needowein, Margibi	02-Jul-2015	Ebola virus/H.sapiens-wt/LBR/2015/Makona-LIBR4866
ssGP Zaire ebolavirus.	ALT66679.1	968561503	297	Liberia: Needowein, Margibi	01-Jul-2015	Ebola virus/H.sapiens-wt/LBR/2015/Makona-LIBR4808
sGP Zaire ebolavirus.	ALT66678.1	968561502	364	Liberia: Needowein, Margibi	01-Jul-2015	Ebola virus/H.sapiens-wt/LBR/2015/Makona-LIBR4808
virion spike glycoprotein precursor Zaire ebolavirus.	ALT66677.1	968561501	676	Liberia: Needowein, Margibi	01-Jul-2015	Ebola virus/H.sapiens-wt/LBR/2015/Makona-LIBR4808
ssGP Zaire ebolavirus.	ALT66670.1	968561493	297	Liberia: Needowein, Margibi	30-Jun-2015	Ebola virus/H.sapiens-wt/LBR/2015/Makona-LIBR4783
sGP Zaire ebolavirus.	ALT66669.1	968561492	364	Liberia: Needowein, Margibi	30-Jun-2015	Ebola virus/H.sapiens-wt/LBR/2015/Makona-LIBR4783
virion spike glycoprotein precursor Zaire ebolavirus.	ALT66668.1	968561491	676	Liberia: Needowein, Margibi	30-Jun-2015	Ebola virus/H.sapiens-wt/LBR/2015/Makona-LIBR4783
ssGP Zaire ebolavirus.	ALT66661.1	968561483	297	Liberia: Needowein, Margibi	29-Jun-2015	Ebola virus/H.sapiens-wt/LBR/2015/Makona-LIBR4748
sGP Zaire ebolavirus.	ALT66660.1	968561482	364	Liberia: Needowein, Margibi	29-Jun-2015	Ebola virus/H.sapiens-wt/LBR/2015/Makona-LIBR4748
virion spike glycoprotein precursor Zaire ebolavirus.	ALT66659.1	968561481	676	Liberia: Needowein, Margibi	29-Jun-2015	Ebola virus/H.sapiens-wt/LBR/2015/Makona-LIBR4748
ssGP Zaire ebolavirus.	AKA43782.1	788304304	297	Sierra Leone	N/A	Ebola virus/H.sapiens-wt/SLE/2014/Makona-G3864.1
sGP Zaire ebolavirus.	AKA43781.1	788304303	364	Sierra Leone	N/A	Ebola virus/H.sapiens-wt/SLE/2014/Makona-G3864.1
virion spike glycoprotein precursor Zaire ebolavirus.	AKA43780.1	788304302	676	Sierra Leone	N/A	Ebola virus/H.sapiens-wt/SLE/2014/Makona-G3864.1
ssGP Zaire ebolavirus.	AMT75757.1	1013071508	297	Liberia: Jallahs Town, Monstserrado	25-Nov-2014	Ebola virus/H.sapiens-wt/LBR/2014/Makona-CDC/NIH-3878
sGP Zaire ebolavirus.	AMT75756.1	1013071507	364	Liberia: Jallahs Town, Monstserrado	25-Nov-2014	Ebola virus/H.sapiens-wt/LBR/2014/Makona-CDC/NIH-3878
virion spike glycoprotein precursor Zaire ebolavirus.	AMT75755.1	1013071506	676	Liberia: Jallahs Town, Monstserrado	25-Nov-2014	Ebola virus/H.sapiens-wt/LBR/2014/Makona-CDC/NIH-3878
ssGP Zaire ebolavirus.	AMT75748.1	1013071498	297	Liberia: Vioja, Monstserrado	25-Nov-2014	Ebola virus/H.sapiens-wt/LBR/2014/Makona-CDC/NIH-3874
sGP Zaire ebolavirus.	AMT75747.1	1013071497	364	Liberia: Vioja, Monstserrado	25-Nov-2014	Ebola virus/H.sapiens-wt/LBR/2014/Makona-CDC/NIH-3874
virion spike glycoprotein precursor Zaire ebolavirus.	AMT75746.1	1013071496	676	Liberia: Vioja, Monstserrado	25-Nov-2014	Ebola virus/H.sapiens-wt/LBR/2014/Makona-CDC/NIH-3874
ssGP Zaire ebolavirus.	AMT75739.1	1013071488	297	Liberia: Buchana, Grand Bassa	25-Nov-2014	Ebola virus/H.sapiens-wt/LBR/2014/Makona-CDC/NIH-3871
sGP Zaire ebolavirus.	AMT75738.1	1013071487	364	Liberia: Buchana, Grand Bassa	25-Nov-2014	Ebola virus/H.sapiens-wt/LBR/2014/Makona-CDC/NIH-3871
virion spike glycoprotein precursor Zaire ebolavirus.	AMT75737.1	1013071486	676	Liberia: Buchana, Grand Bassa	25-Nov-2014	Ebola virus/H.sapiens-wt/LBR/2014/Makona-CDC/NIH-3871
ssGP Zaire ebolavirus.	AMT75730.1	1013071478	297	Liberia: Cape Mount	23-Nov-2014	Ebola virus/H.sapiens-wt/LBR/2014/Makona-CDC/NIH-3832
sGP Zaire ebolavirus.	AMT75729.1	1013071477	364	Liberia: Cape Mount	23-Nov-2014	Ebola virus/H.sapiens-wt/LBR/2014/Makona-CDC/NIH-3832
virion spike glycoprotein precursor Zaire ebolavirus.	AMT75728.1	1013071476	676	Liberia: Cape Mount	23-Nov-2014	Ebola virus/H.sapiens-wt/LBR/2014/Makona-CDC/NIH-3832
ssGP Zaire ebolavirus.	AMT75721.1	1013071468	297	Liberia: Bonja, Monstserrado	23-Nov-2014	Ebola virus/H.sapiens-wt/LBR/2014/Makona-CDC/NIH-3827
sGP Zaire ebolavirus.	AMT75720.1	1013071467	364	Liberia: Bonja, Monstserrado	23-Nov-2014	Ebola virus/H.sapiens-wt/LBR/2014/Makona-CDC/NIH-3827
virion spike glycoprotein precursor Zaire ebolavirus.	AMT75719.1	1013071466	676	Liberia: Bonja, Monstserrado	23-Nov-2014	Ebola virus/H.sapiens-wt/LBR/2014/Makona-CDC/NIH-3827
ssGP Zaire ebolavirus.	AMT75712.1	1013071458	297	Liberia: Monstserrado	19-Nov-2014	Ebola virus/H.sapiens-wt/LBR/2014/Makona-CDC/NIH-3762
sGP Zaire ebolavirus.	AMT75711.1	1013071457	364	Liberia: Monstserrado	19-Nov-2014	Ebola virus/H.sapiens-wt/LBR/2014/Makona-CDC/NIH-3762
virion spike glycoprotein precursor Zaire ebolavirus.	AMT75710.1	1013071456	676	Liberia: Monstserrado	19-Nov-2014	Ebola virus/H.sapiens-wt/LBR/2014/Makona-CDC/NIH-3762
ssGP Zaire ebolavirus.	AMT75703.1	1013071448	297	Liberia: Monstserrado	23-Oct-2014	Ebola virus/H.sapiens-wt/LBR/2014/Makona-CDC/NIH-2984
sGP Zaire ebolavirus.	AMT75702.1	1013071447	364	Liberia: Monstserrado	23-Oct-2014	Ebola virus/H.sapiens-wt/LBR/2014/Makona-CDC/NIH-2984
virion spike glycoprotein precursor Zaire ebolavirus.	AMT75701.1	1013071446	676	Liberia: Monstserrado	23-Oct-2014	Ebola virus/H.sapiens-wt/LBR/2014/Makona-CDC/NIH-2984
ssGP Zaire ebolavirus.	AMT75694.1	1013071438	297	Liberia: Bensonville, Monstserrado	10-Oct-2014	Ebola virus/H.sapiens-wt/LBR/2014/Makona-CDC/NIH-2313
sGP Zaire ebolavirus.	AMT75693.1	1013071437	364	Liberia: Bensonville, Monstserrado	10-Oct-2014	Ebola virus/H.sapiens-wt/LBR/2014/Makona-CDC/NIH-2313
virion spike glycoprotein precursor Zaire ebolavirus.	AMT75692.1	1013071436	676	Liberia: Bensonville, Monstserrado	10-Oct-2014	Ebola virus/H.sapiens-wt/LBR/2014/Makona-CDC/NIH-2313
ssGP Zaire ebolavirus.	AMT75685.1	1013071428	297	Liberia: St Paul Bridge, Monstserrado	10-Oct-2014	Ebola virus/H.sapiens-wt/LBR/2014/Makona-CDC/NIH-2303
sGP Zaire ebolavirus.	AMT75684.1	1013071427	364	Liberia: St Paul Bridge, Monstserrado	10-Oct-2014	Ebola virus/H.sapiens-wt/LBR/2014/Makona-CDC/NIH-2303
virion spike glycoprotein precursor Zaire ebolavirus.	AMT75683.1	1013071426	676	Liberia: St Paul Bridge, Monstserrado	10-Oct-2014	Ebola virus/H.sapiens-wt/LBR/2014/Makona-CDC/NIH-2303
ssGP Zaire ebolavirus.	AMT75676.1	1013071418	297	Liberia: Margibi	27-Sep-2014	Ebola virus/H.sapiens-wt/LBR/2014/Makona-CDC/NIH-1650
sGP Zaire ebolavirus.	AMT75675.1	1013071417	364	Liberia: Margibi	27-Sep-2014	Ebola virus/H.sapiens-wt/LBR/2014/Makona-CDC/NIH-1650
virion spike glycoprotein precursor Zaire ebolavirus.	AMT75674.1	1013071416	676	Liberia: Margibi	27-Sep-2014	Ebola virus/H.sapiens-wt/LBR/2014/Makona-CDC/NIH-1650
ssGP Zaire ebolavirus.	AMT75667.1	1013071408	297	Liberia: Margibi	16-Sep-2014	Ebola virus/H.sapiens-wt/LBR/2014/Makona-CDC/NIH-1122
sGP Zaire ebolavirus.	AMT75666.1	1013071407	364	Liberia: Margibi	16-Sep-2014	Ebola virus/H.sapiens-wt/LBR/2014/Makona-CDC/NIH-1122
virion spike glycoprotein precursor Zaire ebolavirus.	AMT75665.1	1013071406	676	Liberia: Margibi	16-Sep-2014	Ebola virus/H.sapiens-wt/LBR/2014/Makona-CDC/NIH-1122
ssGP Zaire ebolavirus.	AMT75658.1	1013071398	297	Liberia: Redlight, Monstserrado	07-Sep-2014	Ebola virus/H.sapiens-wt/LBR/2014/Makona-CDC/NIH-710
sGP Zaire ebolavirus.	AMT75657.1	1013071397	364	Liberia: Redlight, Monstserrado	07-Sep-2014	Ebola virus/H.sapiens-wt/LBR/2014/Makona-CDC/NIH-710
virion spike glycoprotein precursor Zaire ebolavirus.	AMT75656.1	1013071396	676	Liberia: Redlight, Monstserrado	07-Sep-2014	Ebola virus/H.sapiens-wt/LBR/2014/Makona-CDC/NIH-710
ssGP Zaire ebolavirus.	AMT75649.1	1013071388	297	Liberia: Battery Factory, Monstserrado	07-Sep-2014	Ebola virus/H.sapiens-wt/LBR/2014/Makona-CDC/NIH-708
sGP Zaire ebolavirus.	AMT75648.1	1013071387	364	Liberia: Battery Factory, Monstserrado	07-Sep-2014	Ebola virus/H.sapiens-wt/LBR/2014/Makona-CDC/NIH-708
virion spike glycoprotein precursor Zaire ebolavirus.	AMT75647.1	1013071386	676	Liberia: Battery Factory, Monstserrado	07-Sep-2014	Ebola virus/H.sapiens-wt/LBR/2014/Makona-CDC/NIH-708
ssGP Zaire ebolavirus.	AMT75640.1	1013071378	297	Liberia: Harbel, Margibi	06-Sep-2014	Ebola virus/H.sapiens-wt/LBR/2014/Makona-CDC/NIH-686
sGP Zaire ebolavirus.	AMT75639.1	1013071377	364	Liberia: Harbel, Margibi	06-Sep-2014	Ebola virus/H.sapiens-wt/LBR/2014/Makona-CDC/NIH-686
virion spike glycoprotein precursor Zaire ebolavirus.	AMT75638.1	1013071376	676	Liberia: Harbel, Margibi	06-Sep-2014	Ebola virus/H.sapiens-wt/LBR/2014/Makona-CDC/NIH-686
ssGP Zaire ebolavirus.	AMT75631.1	1013071368	297	Liberia: Soul Clinic, Monstserrado	06-Sep-2014	Ebola virus/H.sapiens-wt/LBR/2014/Makona-CDC/NIH-683
sGP Zaire ebolavirus.	AMT75630.1	1013071367	364	Liberia: Soul Clinic, Monstserrado	06-Sep-2014	Ebola virus/H.sapiens-wt/LBR/2014/Makona-CDC/NIH-683
virion spike glycoprotein precursor Zaire ebolavirus.	AMT75629.1	1013071366	676	Liberia: Soul Clinic, Monstserrado	06-Sep-2014	Ebola virus/H.sapiens-wt/LBR/2014/Makona-CDC/NIH-683
ssGP Zaire ebolavirus.	AMT75622.1	1013071358	297	Liberia: Monstserrado	04-Sep-2014	Ebola virus/H.sapiens-wt/LBR/2014/Makona-CDC/NIH-603
sGP Zaire ebolavirus.	AMT75621.1	1013071357	364	Liberia: Monstserrado	04-Sep-2014	Ebola virus/H.sapiens-wt/LBR/2014/Makona-CDC/NIH-603
virion spike glycoprotein precursor Zaire ebolavirus.	AMT75620.1	1013071356	676	Liberia: Monstserrado	04-Sep-2014	Ebola virus/H.sapiens-wt/LBR/2014/Makona-CDC/NIH-603
ssGP Zaire ebolavirus.	AMT75613.1	1013071348	297	Liberia: Dupont Road, Monstserrado	04-Sep-2014	Ebola virus/H.sapiens-wt/LBR/2014/Makona-CDC/NIH-595
sGP Zaire ebolavirus.	AMT75612.1	1013071347	364	Liberia: Dupont Road, Monstserrado	04-Sep-2014	Ebola virus/H.sapiens-wt/LBR/2014/Makona-CDC/NIH-595
virion spike glycoprotein precursor Zaire ebolavirus.	AMT75611.1	1013071346	676	Liberia: Dupont Road, Monstserrado	04-Sep-2014	Ebola virus/H.sapiens-wt/LBR/2014/Makona-CDC/NIH-595
ssGP Zaire ebolavirus.	AMT75604.1	1013071338	297	Liberia: Monstserrado	27-Aug-2014	Ebola virus/H.sapiens-wt/LBR/2014/Makona-CDC/NIH-272
sGP Zaire ebolavirus.	AMT75603.1	1013071337	364	Liberia: Monstserrado	27-Aug-2014	Ebola virus/H.sapiens-wt/LBR/2014/Makona-CDC/NIH-272
virion spike glycoprotein precursor Zaire ebolavirus.	AMT75602.1	1013071336	676	Liberia: Monstserrado	27-Aug-2014	Ebola virus/H.sapiens-wt/LBR/2014/Makona-CDC/NIH-272
ssGP Zaire ebolavirus.	AMT75595.1	1013071328	297	Liberia: Monstserrado	27-Aug-2014	Ebola virus/H.sapiens-wt/LBR/2014/Makona-CDC/NIH-261
sGP Zaire ebolavirus.	AMT75594.1	1013071327	364	Liberia: Monstserrado	27-Aug-2014	Ebola virus/H.sapiens-wt/LBR/2014/Makona-CDC/NIH-261
virion spike glycoprotein precursor Zaire ebolavirus.	AMT75593.1	1013071326	676	Liberia: Monstserrado	27-Aug-2014	Ebola virus/H.sapiens-wt/LBR/2014/Makona-CDC/NIH-261
ssGP Zaire ebolavirus.	AMT75586.1	1013071318	297	Liberia: Monstserrado	27-Aug-2014	Ebola virus/H.sapiens-wt/LBR/2014/Makona-CDC/NIH-259
sGP Zaire ebolavirus.	AMT75585.1	1013071317	364	Liberia: Monstserrado	27-Aug-2014	Ebola virus/H.sapiens-wt/LBR/2014/Makona-CDC/NIH-259
virion spike glycoprotein precursor Zaire ebolavirus.	AMT75584.1	1013071316	676	Liberia: Monstserrado	27-Aug-2014	Ebola virus/H.sapiens-wt/LBR/2014/Makona-CDC/NIH-259
ssGP Zaire ebolavirus.	AMT75577.1	1013071308	297	Liberia: Monstserrado	27-Aug-2014	Ebola virus/H.sapiens-wt/LBR/2014/Makona-CDC/NIH-257
sGP Zaire ebolavirus.	AMT75576.1	1013071307	364	Liberia: Monstserrado	27-Aug-2014	Ebola virus/H.sapiens-wt/LBR/2014/Makona-CDC/NIH-257
virion spike glycoprotein precursor Zaire ebolavirus.	AMT75575.1	1013071306	676	Liberia: Monstserrado	27-Aug-2014	Ebola virus/H.sapiens-wt/LBR/2014/Makona-CDC/NIH-257
ssGP Zaire ebolavirus.	AMT75568.1	1013071298	297	Guinea	19-Mar-2014	Ebola virus/H.sapiens-tc/GIN/2014/Makona-C05
sGP Zaire ebolavirus.	AMT75567.1	1013071297	364	Guinea	19-Mar-2014	Ebola virus/H.sapiens-tc/GIN/2014/Makona-C05
virion spike glycoprotein precursor Zaire ebolavirus.	AMT75566.1	1013071296	676	Guinea	19-Mar-2014	Ebola virus/H.sapiens-tc/GIN/2014/Makona-C05
ssGP Zaire ebolavirus.	AMT75559.1	1013071288	297	Guinea	10-Mar-2014	Ebola virus/H.sapiens-tc/GIN/2014/Makona-C05
sGP Zaire ebolavirus.	AMT75558.1	1013071287	364	Guinea	10-Mar-2014	Ebola virus/H.sapiens-tc/GIN/2014/Makona-C05
virion spike glycoprotein precursor Zaire ebolavirus.	AMT75557.1	1013071286	676	Guinea	10-Mar-2014	Ebola virus/H.sapiens-tc/GIN/2014/Makona-C05
ssGP Zaire ebolavirus.	AMT75550.1	1013071278	297	Guinea	10-Mar-2014	Ebola virus/H.sapiens-tc/GIN/2014/Makona-C05
sGP Zaire ebolavirus.	AMT75549.1	1013071277	364	Guinea	10-Mar-2014	Ebola virus/H.sapiens-tc/GIN/2014/Makona-C05
virion spike glycoprotein precursor Zaire ebolavirus.	AMT75548.1	1013071276	676	Guinea	10-Mar-2014	Ebola virus/H.sapiens-tc/GIN/2014/Makona-C05
second non-structural secreted glycoprotein Zaire ebolavirus.	ALH21197.1	936345253	297	N/A	N/A	Ebola virus/H.sapiens-tc/COD/1995/Kikwit-9510621
small non-structural, secreted glycoprotein Zaire ebolavirus.	ALH21196.1	936345252	364	N/A	N/A	Ebola virus/H.sapiens-tc/COD/1995/Kikwit-9510621
virion spike glycoprotein precursor Zaire ebolavirus.	ALH21195.1	936345251	676	N/A	N/A	Ebola virus/H.sapiens-tc/COD/1995/Kikwit-9510621
second non-structural secreted glycoprotein Zaire ebolavirus.	ALH21188.1	936345222	297	N/A	N/A	Ebola virus/H.sapiens-tc/COD/1995/Kikwit-9510621
small non-structural, secreted glycoprotein Zaire ebolavirus.	ALH21187.1	936345221	364	N/A	N/A	Ebola virus/H.sapiens-tc/COD/1995/Kikwit-9510621
virion spike glycoprotein precursor Zaire ebolavirus.	ALH21186.1	936345220	676	N/A	N/A	Ebola virus/H.sapiens-tc/COD/1995/Kikwit-9510621
second non-structural secreted glycoprotein Zaire ebolavirus.	ALD19449.1	926464683	297	Democratic Republic of the Congo	24-Jul-2011	Ebola virus/H.sapiens-tc/COD/1995/Kikwit-9510621
small non-structural secreted glycoprotein Zaire ebolavirus.	ALD19448.1	926464682	364	Democratic Republic of the Congo	24-Jul-2011	Ebola virus/H.sapiens-tc/COD/1995/Kikwit-9510621
virion spike glycoprotein precursor Zaire ebolavirus.	ALD19447.1	926464681	676	Democratic Republic of the Congo	24-Jul-2011	Ebola virus/H.sapiens-tc/COD/1995/Kikwit-9510621
sGP Zaire ebolavirus.	ALP30066.1	954033090	364	Liberia	03-Dec-2014	Ebola virus H.sapiens-wt/LBR/2015/Makona-Liberia-DQE2
sGP Zaire ebolavirus.	ALP30058.1	954033081	364	Liberia	30-Dec-2014	Ebola virus H.sapiens-wt/LBR/2014/Makona-Liberia-DQE15
sGP Zaire ebolavirus.	AKC01492.1	806645542	364	Liberia	2014	Ebola virus H.sapiens-wt/LBR/2014/Makona-Liberia-DQE14
sGP Zaire ebolavirus.	AKC01484.1	806645533	364	Liberia	2014	Ebola virus H.sapiens-wt/LBR/2014/Makona-Liberia-DQE13
sGP Zaire ebolavirus.	AKC01476.1	806645524	364	Liberia	2014	Ebola virus H.sapiens-wt/LBR/2014/Makona-Liberia-DQE12
sGP Zaire ebolavirus.	AKC01468.1	806645515	364	Liberia	2015	Ebola virus H.sapiens-wt/LBR/2015/Makona-Liberia-DQE6
sGP Zaire ebolavirus.	AKC01460.1	806645506	364	Liberia	2015	Ebola virus H.sapiens-wt/LBR/2015/Makona-Liberia-DQE5
sGP Zaire ebolavirus.	AKC01452.1	806645497	364	Liberia	2015	Ebola virus H.sapiens-wt/LBR/2015/Makona-Liberia-DQE4
sGP Zaire ebolavirus.	AKC01444.1	806645488	364	Liberia	2015	Ebola virus H.sapiens-wt/LBR/2015/Makona-Liberia-DQE3
sGP Zaire ebolavirus.	AKC01436.1	806645479	364	Liberia	2014	Ebola virus H.sapiens-wt/LBR/2014/Makona-Liberia-DQE1
ssGP Zaire ebolavirus.	ALG02127.1	930628092	297	Liberia: Gbarpolu	13-Nov-2014	Ebola virus/H.sapiens-wt/LBR/2014/Makona-LIBR0157
sGP Zaire ebolavirus.	ALG02126.1	930628091	364	Liberia: Gbarpolu	13-Nov-2014	Ebola virus/H.sapiens-wt/LBR/2014/Makona-LIBR0157
virion spike glycoprotein precursor Zaire ebolavirus.	ALG02125.1	930628090	676	Liberia: Gbarpolu	13-Nov-2014	Ebola virus/H.sapiens-wt/LBR/2014/Makona-LIBR0157
ssGP Zaire ebolavirus.	ALG02118.1	930628082	297	Liberia	19-Aug-2014	Ebola virus/H.sapiens-wt/LBR/2014/Makona-LIBR10187
sGP Zaire ebolavirus.	ALG02117.1	930628081	364	Liberia	19-Aug-2014	Ebola virus/H.sapiens-wt/LBR/2014/Makona-LIBR10187
virion spike glycoprotein precursor Zaire ebolavirus.	ALG02116.1	930628080	676	Liberia	19-Aug-2014	Ebola virus/H.sapiens-wt/LBR/2014/Makona-LIBR10187
ssGP Zaire ebolavirus.	ALG02109.1	930628072	297	Liberia: Montserrado	11-Oct-2014	Ebola virus/H.sapiens-wt/LBR/2014/Makona-LIBR10180
sGP Zaire ebolavirus.	ALG02108.1	930628071	364	Liberia: Montserrado	11-Oct-2014	Ebola virus/H.sapiens-wt/LBR/2014/Makona-LIBR10180
virion spike glycoprotein precursor Zaire ebolavirus.	ALG02107.1	930628070	676	Liberia: Montserrado	11-Oct-2014	Ebola virus/H.sapiens-wt/LBR/2014/Makona-LIBR10180
ssGP Zaire ebolavirus.	ALG02100.1	930628062	297	Liberia: Montserrado	19-Aug-2014	Ebola virus/H.sapiens-wt/LBR/2014/Makona-LIBR10014
sGP Zaire ebolavirus.	ALG02099.1	930628061	364	Liberia: Montserrado	19-Aug-2014	Ebola virus/H.sapiens-wt/LBR/2014/Makona-LIBR10014
virion spike glycoprotein precursor Zaire ebolavirus.	ALG02098.1	930628060	676	Liberia: Montserrado	19-Aug-2014	Ebola virus/H.sapiens-wt/LBR/2014/Makona-LIBR10014
ssGP Zaire ebolavirus.	ALG02091.1	930628052	297	Liberia: Montserrado	29-Sep-2014	Ebola virus/H.sapiens-wt/LBR/2014/Makona-LIBR10214
sGP Zaire ebolavirus.	ALG02090.1	930628051	364	Liberia: Montserrado	29-Sep-2014	Ebola virus/H.sapiens-wt/LBR/2014/Makona-LIBR10214
virion spike glycoprotein precursor Zaire ebolavirus.	ALG02089.1	930628050	676	Liberia: Montserrado	29-Sep-2014	Ebola virus/H.sapiens-wt/LBR/2014/Makona-LIBR10214
ssGP Zaire ebolavirus.	ALG02082.1	930628042	297	Liberia	04-Jul-2014	Ebola virus/H.sapiens-wt/LBR/2014/Makona-LIBR10249
sGP Zaire ebolavirus.	ALG02081.1	930628041	364	Liberia	04-Jul-2014	Ebola virus/H.sapiens-wt/LBR/2014/Makona-LIBR10249
virion spike glycoprotein precursor Zaire ebolavirus.	ALG02080.1	930628040	676	Liberia	04-Jul-2014	Ebola virus/H.sapiens-wt/LBR/2014/Makona-LIBR10249
ssGP Zaire ebolavirus.	ALG02073.1	930628032	297	Liberia	20-Aug-2014	Ebola virus/H.sapiens-wt/LBR/2014/Makona-LIBR10110
sGP Zaire ebolavirus.	ALG02072.1	930628031	364	Liberia	20-Aug-2014	Ebola virus/H.sapiens-wt/LBR/2014/Makona-LIBR10110
virion spike glycoprotein precursor Zaire ebolavirus.	ALG02071.1	930628030	676	Liberia	20-Aug-2014	Ebola virus/H.sapiens-wt/LBR/2014/Makona-LIBR10110
ssGP Zaire ebolavirus.	ALG02064.1	930628022	297	Liberia: Nimba	15-Aug-2014	Ebola virus/H.sapiens-wt/LBR/2014/Makona-LIBR10033
sGP Zaire ebolavirus.	ALG02063.1	930628021	364	Liberia: Nimba	15-Aug-2014	Ebola virus/H.sapiens-wt/LBR/2014/Makona-LIBR10033
virion spike glycoprotein precursor Zaire ebolavirus.	ALG02062.1	930628020	676	Liberia: Nimba	15-Aug-2014	Ebola virus/H.sapiens-wt/LBR/2014/Makona-LIBR10033
ssGP Zaire ebolavirus.	ALG02055.1	930628012	297	Liberia	09-Sep-2014	Ebola virus/H.sapiens-wt/LBR/2014/Makona-LIBR10137
sGP Zaire ebolavirus.	ALG02054.1	930628011	364	Liberia	09-Sep-2014	Ebola virus/H.sapiens-wt/LBR/2014/Makona-LIBR10137
virion spike glycoprotein precursor Zaire ebolavirus.	ALG02053.1	930628010	676	Liberia	09-Sep-2014	Ebola virus/H.sapiens-wt/LBR/2014/Makona-LIBR10137
ssGP Zaire ebolavirus.	ALG02046.1	930628002	297	Liberia: Montserrado	04-Feb-2015	Ebola virus/H.sapiens-wt/LBR/2015/Makona-LIBR1221
sGP Zaire ebolavirus.	ALG02045.1	930628001	364	Liberia: Montserrado	04-Feb-2015	Ebola virus/H.sapiens-wt/LBR/2015/Makona-LIBR1221
virion spike glycoprotein precursor Zaire ebolavirus.	ALG02044.1	930628000	676	Liberia: Montserrado	04-Feb-2015	Ebola virus/H.sapiens-wt/LBR/2015/Makona-LIBR1221
ssGP Zaire ebolavirus.	ALG02037.1	930627992	297	Liberia	17-Aug-2014	Ebola virus/H.sapiens-wt/LBR/2014/Makona-LIBR10098
sGP Zaire ebolavirus.	ALG02036.1	930627991	364	Liberia	17-Aug-2014	Ebola virus/H.sapiens-wt/LBR/2014/Makona-LIBR10098
virion spike glycoprotein precursor Zaire ebolavirus.	ALG02035.1	930627990	676	Liberia	17-Aug-2014	Ebola virus/H.sapiens-wt/LBR/2014/Makona-LIBR10098
ssGP Zaire ebolavirus.	ALG02028.1	930627982	297	Liberia	24-Aug-2014	Ebola virus/H.sapiens-wt/LBR/2014/Makona-LIBR10169
sGP Zaire ebolavirus.	ALG02027.1	930627981	364	Liberia	24-Aug-2014	Ebola virus/H.sapiens-wt/LBR/2014/Makona-LIBR10169
virion spike glycoprotein precursor Zaire ebolavirus.	ALG02026.1	930627980	676	Liberia	24-Aug-2014	Ebola virus/H.sapiens-wt/LBR/2014/Makona-LIBR10169
ssGP Zaire ebolavirus.	ALG02019.1	930627972	297	Liberia: Margibi	26-Aug-2014	Ebola virus/H.sapiens-wt/LBR/2014/Makona-LIBR10086
sGP Zaire ebolavirus.	ALG02018.1	930627971	364	Liberia: Margibi	26-Aug-2014	Ebola virus/H.sapiens-wt/LBR/2014/Makona-LIBR10086
virion spike glycoprotein precursor Zaire ebolavirus.	ALG02017.1	930627970	676	Liberia: Margibi	26-Aug-2014	Ebola virus/H.sapiens-wt/LBR/2014/Makona-LIBR10086
ssGP Zaire ebolavirus.	ALG02010.1	930627962	297	Liberia	17-Aug-2014	Ebola virus/H.sapiens-wt/LBR/2014/Makona-LIBR10092
sGP Zaire ebolavirus.	ALG02009.1	930627961	364	Liberia	17-Aug-2014	Ebola virus/H.sapiens-wt/LBR/2014/Makona-LIBR10092
virion spike glycoprotein precursor Zaire ebolavirus.	ALG02008.1	930627960	676	Liberia	17-Aug-2014	Ebola virus/H.sapiens-wt/LBR/2014/Makona-LIBR10092
ssGP Zaire ebolavirus.	ALG02001.1	930627952	297	Liberia: Montserrado	20-Sep-2014	Ebola virus/H.sapiens-wt/LBR/2014/Makona-LIBR10066
sGP Zaire ebolavirus.	ALG02000.1	930627951	364	Liberia: Montserrado	20-Sep-2014	Ebola virus/H.sapiens-wt/LBR/2014/Makona-LIBR10066
virion spike glycoprotein precursor Zaire ebolavirus.	ALG01999.1	930627950	676	Liberia: Montserrado	20-Sep-2014	Ebola virus/H.sapiens-wt/LBR/2014/Makona-LIBR10066
ssGP Zaire ebolavirus.	ALG01992.1	930627942	297	Liberia	16-Aug-2014	Ebola virus/H.sapiens-wt/LBR/2014/Makona-LIBR10022
sGP Zaire ebolavirus.	ALG01991.1	930627941	364	Liberia	16-Aug-2014	Ebola virus/H.sapiens-wt/LBR/2014/Makona-LIBR10022
virion spike glycoprotein precursor Zaire ebolavirus.	ALG01990.1	930627940	676	Liberia	16-Aug-2014	Ebola virus/H.sapiens-wt/LBR/2014/Makona-LIBR10022
ssGP Zaire ebolavirus.	ALG01983.1	930627932	297	Liberia	17-Aug-2014	Ebola virus/H.sapiens-wt/LBR/2014/Makona-LIBR10089
sGP Zaire ebolavirus.	ALG01982.1	930627931	364	Liberia	17-Aug-2014	Ebola virus/H.sapiens-wt/LBR/2014/Makona-LIBR10089
virion spike glycoprotein precursor Zaire ebolavirus.	ALG01981.1	930627930	676	Liberia	17-Aug-2014	Ebola virus/H.sapiens-wt/LBR/2014/Makona-LIBR10089
ssGP Zaire ebolavirus.	ALG01974.1	930627922	297	Liberia: Montserrado	23-Sep-2014	Ebola virus/H.sapiens-wt/LBR/2014/Makona-LIBR10061
sGP Zaire ebolavirus.	ALG01973.1	930627921	364	Liberia: Montserrado	23-Sep-2014	Ebola virus/H.sapiens-wt/LBR/2014/Makona-LIBR10061
virion spike glycoprotein precursor Zaire ebolavirus.	ALG01972.1	930627920	676	Liberia: Montserrado	23-Sep-2014	Ebola virus/H.sapiens-wt/LBR/2014/Makona-LIBR10061
ssGP Zaire ebolavirus.	ALG01965.1	930627912	297	Liberia: Montserrado	11-Oct-2014	Ebola virus/H.sapiens-wt/LBR/2014/Makona-LIBR10179
sGP Zaire ebolavirus.	ALG01964.1	930627911	364	Liberia: Montserrado	11-Oct-2014	Ebola virus/H.sapiens-wt/LBR/2014/Makona-LIBR10179
virion spike glycoprotein precursor Zaire ebolavirus.	ALG01963.1	930627910	676	Liberia: Montserrado	11-Oct-2014	Ebola virus/H.sapiens-wt/LBR/2014/Makona-LIBR10179
ssGP Zaire ebolavirus.	ALG01956.1	930627902	297	Liberia: Montserrado	05-Oct-2014	Ebola virus/H.sapiens-wt/LBR/2014/Makona-LIBR10267
sGP Zaire ebolavirus.	ALG01955.1	930627901	364	Liberia: Montserrado	05-Oct-2014	Ebola virus/H.sapiens-wt/LBR/2014/Makona-LIBR10267
virion spike glycoprotein precursor Zaire ebolavirus.	ALG01954.1	930627900	676	Liberia: Montserrado	05-Oct-2014	Ebola virus/H.sapiens-wt/LBR/2014/Makona-LIBR10267
ssGP Zaire ebolavirus.	ALG01947.1	930627892	297	Liberia	19-Sep-2014	Ebola virus/H.sapiens-wt/LBR/2014/Makona-LIBR10212
sGP Zaire ebolavirus.	ALG01946.1	930627891	364	Liberia	19-Sep-2014	Ebola virus/H.sapiens-wt/LBR/2014/Makona-LIBR10212
virion spike glycoprotein precursor Zaire ebolavirus.	ALG01945.1	930627890	676	Liberia	19-Sep-2014	Ebola virus/H.sapiens-wt/LBR/2014/Makona-LIBR10212
ssGP Zaire ebolavirus.	ALG01938.1	930627882	297	Liberia: Montserrado	02-Oct-2014	Ebola virus/H.sapiens-wt/LBR/2014/Makona-LIBR11079
sGP Zaire ebolavirus.	ALG01937.1	930627881	364	Liberia: Montserrado	02-Oct-2014	Ebola virus/H.sapiens-wt/LBR/2014/Makona-LIBR11079
virion spike glycoprotein precursor Zaire ebolavirus.	ALG01936.1	930627880	676	Liberia: Montserrado	02-Oct-2014	Ebola virus/H.sapiens-wt/LBR/2014/Makona-LIBR11079
ssGP Zaire ebolavirus.	ALG01929.1	930627872	297	Liberia: Montserrado	19-Sep-2014	Ebola virus/H.sapiens-wt/LBR/2014/Makona-LIBR10209
sGP Zaire ebolavirus.	ALG01928.1	930627871	364	Liberia: Montserrado	19-Sep-2014	Ebola virus/H.sapiens-wt/LBR/2014/Makona-LIBR10209
virion spike glycoprotein precursor Zaire ebolavirus.	ALG01927.1	930627870	676	Liberia: Montserrado	19-Sep-2014	Ebola virus/H.sapiens-wt/LBR/2014/Makona-LIBR10209
ssGP Zaire ebolavirus.	ALG01920.1	930627862	297	Liberia: Montserrado	13-Nov-2014	Ebola virus/H.sapiens-wt/LBR/2014/Makona-LIBR0160
sGP Zaire ebolavirus.	ALG01919.1	930627861	364	Liberia: Montserrado	13-Nov-2014	Ebola virus/H.sapiens-wt/LBR/2014/Makona-LIBR0160
virion spike glycoprotein precursor Zaire ebolavirus.	ALG01918.1	930627860	676	Liberia: Montserrado	13-Nov-2014	Ebola virus/H.sapiens-wt/LBR/2014/Makona-LIBR0160
ssGP Zaire ebolavirus.	ALG01911.1	930627852	297	Liberia: Margibi	26-Aug-2014	Ebola virus/H.sapiens-wt/LBR/2014/Makona-LIBR10277
sGP Zaire ebolavirus.	ALG01910.1	930627851	364	Liberia: Margibi	26-Aug-2014	Ebola virus/H.sapiens-wt/LBR/2014/Makona-LIBR10277
virion spike glycoprotein precursor Zaire ebolavirus.	ALG01909.1	930627850	676	Liberia: Margibi	26-Aug-2014	Ebola virus/H.sapiens-wt/LBR/2014/Makona-LIBR10277
ssGP Zaire ebolavirus.	ALG01902.1	930627842	297	Liberia	01-Oct-2014	Ebola virus/H.sapiens-wt/LBR/2014/Makona-LIBR10051
sGP Zaire ebolavirus.	ALG01901.1	930627841	364	Liberia	01-Oct-2014	Ebola virus/H.sapiens-wt/LBR/2014/Makona-LIBR10051
virion spike glycoprotein precursor Zaire ebolavirus.	ALG01900.1	930627840	676	Liberia	01-Oct-2014	Ebola virus/H.sapiens-wt/LBR/2014/Makona-LIBR10051
ssGP Zaire ebolavirus.	ALG01893.1	930627832	297	Liberia	20-Aug-2014	Ebola virus/H.sapiens-wt/LBR/2014/Makona-LIBR10113
sGP Zaire ebolavirus.	ALG01892.1	930627831	364	Liberia	20-Aug-2014	Ebola virus/H.sapiens-wt/LBR/2014/Makona-LIBR10113
virion spike glycoprotein precursor Zaire ebolavirus.	ALG01891.1	930627830	676	Liberia	20-Aug-2014	Ebola virus/H.sapiens-wt/LBR/2014/Makona-LIBR10113
ssGP Zaire ebolavirus.	ALG01884.1	930627822	297	Liberia: Montserrado	29-Dec-2014	Ebola virus/H.sapiens-wt/LBR/2014/Makona-LIBR0707
sGP Zaire ebolavirus.	ALG01883.1	930627821	364	Liberia: Montserrado	29-Dec-2014	Ebola virus/H.sapiens-wt/LBR/2014/Makona-LIBR0707
virion spike glycoprotein precursor Zaire ebolavirus.	ALG01882.1	930627820	676	Liberia: Montserrado	29-Dec-2014	Ebola virus/H.sapiens-wt/LBR/2014/Makona-LIBR0707
ssGP Zaire ebolavirus.	ALG01875.1	930627812	297	Liberia: River Gee	20-Aug-2014	Ebola virus/H.sapiens-wt/LBR/2014/Makona-LIBR10112
sGP Zaire ebolavirus.	ALG01874.1	930627811	364	Liberia: River Gee	20-Aug-2014	Ebola virus/H.sapiens-wt/LBR/2014/Makona-LIBR10112
virion spike glycoprotein precursor Zaire ebolavirus.	ALG01873.1	930627810	676	Liberia: River Gee	20-Aug-2014	Ebola virus/H.sapiens-wt/LBR/2014/Makona-LIBR10112
ssGP Zaire ebolavirus.	ALG01866.1	930627802	297	Liberia: Montserrado	24-Aug-2014	Ebola virus/H.sapiens-wt/LBR/2014/Makona-LIBR10118
sGP Zaire ebolavirus.	ALG01865.1	930627801	364	Liberia: Montserrado	24-Aug-2014	Ebola virus/H.sapiens-wt/LBR/2014/Makona-LIBR10118
virion spike glycoprotein precursor Zaire ebolavirus.	ALG01864.1	930627800	676	Liberia: Montserrado	24-Aug-2014	Ebola virus/H.sapiens-wt/LBR/2014/Makona-LIBR10118
ssGP Zaire ebolavirus.	ALG01857.1	930627792	297	Liberia: Nimba	17-Aug-2014	Ebola virus/H.sapiens-wt/LBR/2014/Makona-LIBR10093
sGP Zaire ebolavirus.	ALG01856.1	930627791	364	Liberia: Nimba	17-Aug-2014	Ebola virus/H.sapiens-wt/LBR/2014/Makona-LIBR10093
virion spike glycoprotein precursor Zaire ebolavirus.	ALG01855.1	930627790	676	Liberia: Nimba	17-Aug-2014	Ebola virus/H.sapiens-wt/LBR/2014/Makona-LIBR10093
ssGP Zaire ebolavirus.	ALG01848.1	930627782	297	Liberia	20-Sep-2014	Ebola virus/H.sapiens-wt/LBR/2014/Makona-LIBR10145
sGP Zaire ebolavirus.	ALG01847.1	930627781	364	Liberia	20-Sep-2014	Ebola virus/H.sapiens-wt/LBR/2014/Makona-LIBR10145
virion spike glycoprotein precursor Zaire ebolavirus.	ALG01846.1	930627780	676	Liberia	20-Sep-2014	Ebola virus/H.sapiens-wt/LBR/2014/Makona-LIBR10145
ssGP Zaire ebolavirus.	ALG01839.1	930627772	297	Liberia	01-Oct-2014	Ebola virus/H.sapiens-wt/LBR/2014/Makona-LIBR10048
sGP Zaire ebolavirus.	ALG01838.1	930627771	364	Liberia	01-Oct-2014	Ebola virus/H.sapiens-wt/LBR/2014/Makona-LIBR10048
virion spike glycoprotein precursor Zaire ebolavirus.	ALG01837.1	930627770	676	Liberia	01-Oct-2014	Ebola virus/H.sapiens-wt/LBR/2014/Makona-LIBR10048
ssGP Zaire ebolavirus.	ALG01830.1	930627762	297	Liberia	23-Jun-2014	Ebola virus/H.sapiens-wt/LBR/2014/Makona-LIBR10250
sGP Zaire ebolavirus.	ALG01829.1	930627761	364	Liberia	23-Jun-2014	Ebola virus/H.sapiens-wt/LBR/2014/Makona-LIBR10250
virion spike glycoprotein precursor Zaire ebolavirus.	ALG01828.1	930627760	676	Liberia	23-Jun-2014	Ebola virus/H.sapiens-wt/LBR/2014/Makona-LIBR10250
ssGP Zaire ebolavirus.	ALG01821.1	930627752	297	Liberia	23-Sep-2014	Ebola virus/H.sapiens-wt/LBR/2014/Makona-LIBR10062
sGP Zaire ebolavirus.	ALG01820.1	930627751	364	Liberia	23-Sep-2014	Ebola virus/H.sapiens-wt/LBR/2014/Makona-LIBR10062
virion spike glycoprotein precursor Zaire ebolavirus.	ALG01819.1	930627750	676	Liberia	23-Sep-2014	Ebola virus/H.sapiens-wt/LBR/2014/Makona-LIBR10062
ssGP Zaire ebolavirus.	ALG01812.1	930627742	297	Liberia: Margibi	05-Oct-2014	Ebola virus/H.sapiens-wt/LBR/2014/Makona-LIBR11177
sGP Zaire ebolavirus.	ALG01811.1	930627741	364	Liberia: Margibi	05-Oct-2014	Ebola virus/H.sapiens-wt/LBR/2014/Makona-LIBR11177
virion spike glycoprotein precursor Zaire ebolavirus.	ALG01810.1	930627740	676	Liberia: Margibi	05-Oct-2014	Ebola virus/H.sapiens-wt/LBR/2014/Makona-LIBR11177
ssGP Zaire ebolavirus.	ALG01803.1	930627732	297	Liberia: Montserrado	23-Sep-2014	Ebola virus/H.sapiens-wt/LBR/2014/Makona-LIBR10060
sGP Zaire ebolavirus.	ALG01802.1	930627731	364	Liberia: Montserrado	23-Sep-2014	Ebola virus/H.sapiens-wt/LBR/2014/Makona-LIBR10060
virion spike glycoprotein precursor Zaire ebolavirus.	ALG01801.1	930627730	676	Liberia: Montserrado	23-Sep-2014	Ebola virus/H.sapiens-wt/LBR/2014/Makona-LIBR10060
ssGP Zaire ebolavirus.	ALG01794.1	930627722	297	Liberia: Montserrado	27-Aug-2014	Ebola virus/H.sapiens-wt/LBR/2014/Makona-LIBR10202
sGP Zaire ebolavirus.	ALG01793.1	930627721	364	Liberia: Montserrado	27-Aug-2014	Ebola virus/H.sapiens-wt/LBR/2014/Makona-LIBR10202
virion spike glycoprotein precursor Zaire ebolavirus.	ALG01792.1	930627720	676	Liberia: Montserrado	27-Aug-2014	Ebola virus/H.sapiens-wt/LBR/2014/Makona-LIBR10202
ssGP Zaire ebolavirus.	ALG01785.1	930627712	297	Liberia: Montserrado	30-Aug-2014	Ebola virus/H.sapiens-wt/LBR/2014/Makona-LIBR10128
sGP Zaire ebolavirus.	ALG01784.1	930627711	364	Liberia: Montserrado	30-Aug-2014	Ebola virus/H.sapiens-wt/LBR/2014/Makona-LIBR10128
virion spike glycoprotein precursor Zaire ebolavirus.	ALG01783.1	930627710	676	Liberia: Montserrado	30-Aug-2014	Ebola virus/H.sapiens-wt/LBR/2014/Makona-LIBR10128
ssGP Zaire ebolavirus.	ALG01776.1	930627702	297	Liberia: Montserrado	26-Sep-2014	Ebola virus/H.sapiens-wt/LBR/2014/Makona-LIBR10230
sGP Zaire ebolavirus.	ALG01775.1	930627701	364	Liberia: Montserrado	26-Sep-2014	Ebola virus/H.sapiens-wt/LBR/2014/Makona-LIBR10230
virion spike glycoprotein precursor Zaire ebolavirus.	ALG01774.1	930627700	676	Liberia: Montserrado	26-Sep-2014	Ebola virus/H.sapiens-wt/LBR/2014/Makona-LIBR10230
ssGP Zaire ebolavirus.	ALG01767.1	930627692	297	Liberia	20-Sep-2014	Ebola virus/H.sapiens-wt/LBR/2014/Makona-LIBR10168
sGP Zaire ebolavirus.	ALG01766.1	930627691	364	Liberia	20-Sep-2014	Ebola virus/H.sapiens-wt/LBR/2014/Makona-LIBR10168
virion spike glycoprotein precursor Zaire ebolavirus.	ALG01765.1	930627690	676	Liberia	20-Sep-2014	Ebola virus/H.sapiens-wt/LBR/2014/Makona-LIBR10168
ssGP Zaire ebolavirus.	ALG01758.1	930627682	297	Liberia: Grand Bassa	13-Sep-2014	Ebola virus/H.sapiens-wt/LBR/2014/Makona-LIBR10156
sGP Zaire ebolavirus.	ALG01757.1	930627681	364	Liberia: Grand Bassa	13-Sep-2014	Ebola virus/H.sapiens-wt/LBR/2014/Makona-LIBR10156
virion spike glycoprotein precursor Zaire ebolavirus.	ALG01756.1	930627680	676	Liberia: Grand Bassa	13-Sep-2014	Ebola virus/H.sapiens-wt/LBR/2014/Makona-LIBR10156
ssGP Zaire ebolavirus.	ALG01749.1	930627672	297	Liberia: Montserrado	19-Sep-2014	Ebola virus/H.sapiens-wt/LBR/2014/Makona-LIBR10205
sGP Zaire ebolavirus.	ALG01748.1	930627671	364	Liberia: Montserrado	19-Sep-2014	Ebola virus/H.sapiens-wt/LBR/2014/Makona-LIBR10205
virion spike glycoprotein precursor Zaire ebolavirus.	ALG01747.1	930627670	676	Liberia: Montserrado	19-Sep-2014	Ebola virus/H.sapiens-wt/LBR/2014/Makona-LIBR10205
ssGP Zaire ebolavirus.	ALG01740.1	930627662	297	Liberia: Montserrado	17-Aug-2014	Ebola virus/H.sapiens-wt/LBR/2014/Makona-LIBR10170
sGP Zaire ebolavirus.	ALG01739.1	930627661	364	Liberia: Montserrado	17-Aug-2014	Ebola virus/H.sapiens-wt/LBR/2014/Makona-LIBR10170
virion spike glycoprotein precursor Zaire ebolavirus.	ALG01738.1	930627660	676	Liberia: Montserrado	17-Aug-2014	Ebola virus/H.sapiens-wt/LBR/2014/Makona-LIBR10170
ssGP Zaire ebolavirus.	ALG01731.1	930627652	297	Liberia: Montserrado	26-Aug-2014	Ebola virus/H.sapiens-wt/LBR/2014/Makona-LIBR10088
sGP Zaire ebolavirus.	ALG01730.1	930627651	364	Liberia: Montserrado	26-Aug-2014	Ebola virus/H.sapiens-wt/LBR/2014/Makona-LIBR10088
virion spike glycoprotein precursor Zaire ebolavirus.	ALG01729.1	930627650	676	Liberia: Montserrado	26-Aug-2014	Ebola virus/H.sapiens-wt/LBR/2014/Makona-LIBR10088
ssGP Zaire ebolavirus.	ALG01722.1	930627642	297	Liberia: Margibi	16-Aug-2014	Ebola virus/H.sapiens-wt/LBR/2014/Makona-LIBR10029
sGP Zaire ebolavirus.	ALG01721.1	930627641	364	Liberia: Margibi	16-Aug-2014	Ebola virus/H.sapiens-wt/LBR/2014/Makona-LIBR10029
virion spike glycoprotein precursor Zaire ebolavirus.	ALG01720.1	930627640	676	Liberia: Margibi	16-Aug-2014	Ebola virus/H.sapiens-wt/LBR/2014/Makona-LIBR10029
ssGP Zaire ebolavirus.	ALG01713.1	930627632	297	Liberia	26-Aug-2014	Ebola virus/H.sapiens-wt/LBR/2014/Makona-LIBR10271
sGP Zaire ebolavirus.	ALG01712.1	930627631	364	Liberia	26-Aug-2014	Ebola virus/H.sapiens-wt/LBR/2014/Makona-LIBR10271
virion spike glycoprotein precursor Zaire ebolavirus.	ALG01711.1	930627630	676	Liberia	26-Aug-2014	Ebola virus/H.sapiens-wt/LBR/2014/Makona-LIBR10271
ssGP Zaire ebolavirus.	ALG01704.1	930627622	297	Liberia: Margibi	26-Aug-2014	Ebola virus/H.sapiens-wt/LBR/2014/Makona-LIBR10087
sGP Zaire ebolavirus.	ALG01703.1	930627621	364	Liberia: Margibi	26-Aug-2014	Ebola virus/H.sapiens-wt/LBR/2014/Makona-LIBR10087
virion spike glycoprotein precursor Zaire ebolavirus.	ALG01702.1	930627620	676	Liberia: Margibi	26-Aug-2014	Ebola virus/H.sapiens-wt/LBR/2014/Makona-LIBR10087
ssGP Zaire ebolavirus.	ALG01695.1	930627612	297	Liberia: Margibi	01-Oct-2014	Ebola virus/H.sapiens-wt/LBR/2014/Makona-LIBR10047
sGP Zaire ebolavirus.	ALG01694.1	930627611	364	Liberia: Margibi	01-Oct-2014	Ebola virus/H.sapiens-wt/LBR/2014/Makona-LIBR10047
virion spike glycoprotein precursor Zaire ebolavirus.	ALG01693.1	930627610	676	Liberia: Margibi	01-Oct-2014	Ebola virus/H.sapiens-wt/LBR/2014/Makona-LIBR10047
ssGP Zaire ebolavirus.	ALG01686.1	930627602	297	Liberia	16-Aug-2014	Ebola virus/H.sapiens-wt/LBR/2014/Makona-LIBR10026
sGP Zaire ebolavirus.	ALG01685.1	930627601	364	Liberia	16-Aug-2014	Ebola virus/H.sapiens-wt/LBR/2014/Makona-LIBR10026
virion spike glycoprotein precursor Zaire ebolavirus.	ALG01684.1	930627600	676	Liberia	16-Aug-2014	Ebola virus/H.sapiens-wt/LBR/2014/Makona-LIBR10026
ssGP Zaire ebolavirus.	ALG01677.1	930627592	297	Liberia: Montserrado	01-Sep-2014	Ebola virus/H.sapiens-wt/LBR/2014/Makona-LIBR10130
sGP Zaire ebolavirus.	ALG01676.1	930627591	364	Liberia: Montserrado	01-Sep-2014	Ebola virus/H.sapiens-wt/LBR/2014/Makona-LIBR10130
virion spike glycoprotein precursor Zaire ebolavirus.	ALG01675.1	930627590	676	Liberia: Montserrado	01-Sep-2014	Ebola virus/H.sapiens-wt/LBR/2014/Makona-LIBR10130
ssGP Zaire ebolavirus.	ALG01668.1	930627582	297	Liberia: Montserrado	26-Nov-2014	Ebola virus/H.sapiens-wt/LBR/2014/Makona-LIBR0350
sGP Zaire ebolavirus.	ALG01667.1	930627581	364	Liberia: Montserrado	26-Nov-2014	Ebola virus/H.sapiens-wt/LBR/2014/Makona-LIBR0350
virion spike glycoprotein precursor Zaire ebolavirus.	ALG01666.1	930627580	676	Liberia: Montserrado	26-Nov-2014	Ebola virus/H.sapiens-wt/LBR/2014/Makona-LIBR0350
ssGP Zaire ebolavirus.	ALG01659.1	930627572	297	Liberia: Montserrado	26-Aug-2014	Ebola virus/H.sapiens-wt/LBR/2014/Makona-LIBR10279
sGP Zaire ebolavirus.	ALG01658.1	930627571	364	Liberia: Montserrado	26-Aug-2014	Ebola virus/H.sapiens-wt/LBR/2014/Makona-LIBR10279
virion spike glycoprotein precursor Zaire ebolavirus.	ALG01657.1	930627570	676	Liberia: Montserrado	26-Aug-2014	Ebola virus/H.sapiens-wt/LBR/2014/Makona-LIBR10279
ssGP Zaire ebolavirus.	ALG01650.1	930627562	297	Liberia: Bomi	23-Sep-2014	Ebola virus/H.sapiens-wt/LBR/2014/Makona-LIBR10055
sGP Zaire ebolavirus.	ALG01649.1	930627561	364	Liberia: Bomi	23-Sep-2014	Ebola virus/H.sapiens-wt/LBR/2014/Makona-LIBR10055
virion spike glycoprotein precursor Zaire ebolavirus.	ALG01648.1	930627560	676	Liberia: Bomi	23-Sep-2014	Ebola virus/H.sapiens-wt/LBR/2014/Makona-LIBR10055
ssGP Zaire ebolavirus.	ALG01641.1	930627552	297	Liberia: Margibi	26-Aug-2014	Ebola virus/H.sapiens-wt/LBR/2014/Makona-LIBR10081
sGP Zaire ebolavirus.	ALG01640.1	930627551	364	Liberia: Margibi	26-Aug-2014	Ebola virus/H.sapiens-wt/LBR/2014/Makona-LIBR10081
virion spike glycoprotein precursor Zaire ebolavirus.	ALG01639.1	930627550	676	Liberia: Margibi	26-Aug-2014	Ebola virus/H.sapiens-wt/LBR/2014/Makona-LIBR10081
ssGP Zaire ebolavirus.	ALG01632.1	930627542	297	Liberia: Nimba	20-Aug-2014	Ebola virus/H.sapiens-wt/LBR/2014/Makona-LIBR10103
sGP Zaire ebolavirus.	ALG01631.1	930627541	364	Liberia: Nimba	20-Aug-2014	Ebola virus/H.sapiens-wt/LBR/2014/Makona-LIBR10103
virion spike glycoprotein precursor Zaire ebolavirus.	ALG01630.1	930627540	676	Liberia: Nimba	20-Aug-2014	Ebola virus/H.sapiens-wt/LBR/2014/Makona-LIBR10103
ssGP Zaire ebolavirus.	ALG01623.1	930627532	297	Liberia: Nimba	20-Aug-2014	Ebola virus/H.sapiens-wt/LBR/2014/Makona-LIBR10106
sGP Zaire ebolavirus.	ALG01622.1	930627531	364	Liberia: Nimba	20-Aug-2014	Ebola virus/H.sapiens-wt/LBR/2014/Makona-LIBR10106
virion spike glycoprotein precursor Zaire ebolavirus.	ALG01621.1	930627530	676	Liberia: Nimba	20-Aug-2014	Ebola virus/H.sapiens-wt/LBR/2014/Makona-LIBR10106
ssGP Zaire ebolavirus.	ALG01614.1	930627522	297	Liberia	25-Jun-2014	Ebola virus/H.sapiens-wt/LBR/2014/Makona-LIBR10306
sGP Zaire ebolavirus.	ALG01613.1	930627521	364	Liberia	25-Jun-2014	Ebola virus/H.sapiens-wt/LBR/2014/Makona-LIBR10306
virion spike glycoprotein precursor Zaire ebolavirus.	ALG01612.1	930627520	676	Liberia	25-Jun-2014	Ebola virus/H.sapiens-wt/LBR/2014/Makona-LIBR10306
ssGP Zaire ebolavirus.	ALG01605.1	930627512	297	Liberia	18-Aug-2014	Ebola virus/H.sapiens-wt/LBR/2014/Makona-LIBR10021
sGP Zaire ebolavirus.	ALG01604.1	930627511	364	Liberia	18-Aug-2014	Ebola virus/H.sapiens-wt/LBR/2014/Makona-LIBR10021
virion spike glycoprotein precursor Zaire ebolavirus.	ALG01603.1	930627510	676	Liberia	18-Aug-2014	Ebola virus/H.sapiens-wt/LBR/2014/Makona-LIBR10021
ssGP Zaire ebolavirus.	ALG01596.1	930627502	297	Liberia	20-Sep-2014	Ebola virus/H.sapiens-wt/LBR/2014/Makona-LIBR10076
sGP Zaire ebolavirus.	ALG01595.1	930627501	364	Liberia	20-Sep-2014	Ebola virus/H.sapiens-wt/LBR/2014/Makona-LIBR10076
virion spike glycoprotein precursor Zaire ebolavirus.	ALG01594.1	930627500	676	Liberia	20-Sep-2014	Ebola virus/H.sapiens-wt/LBR/2014/Makona-LIBR10076
ssGP Zaire ebolavirus.	ALG01587.1	930627492	297	Liberia: Grand Bassa	17-Nov-2014	Ebola virus/H.sapiens-wt/LBR/2014/Makona-LIBR0229
sGP Zaire ebolavirus.	ALG01586.1	930627491	364	Liberia: Grand Bassa	17-Nov-2014	Ebola virus/H.sapiens-wt/LBR/2014/Makona-LIBR0229
virion spike glycoprotein precursor Zaire ebolavirus.	ALG01585.1	930627490	676	Liberia: Grand Bassa	17-Nov-2014	Ebola virus/H.sapiens-wt/LBR/2014/Makona-LIBR0229
ssGP Zaire ebolavirus.	ALG01578.1	930627482	297	Liberia	01-Jul-2014	Ebola virus/H.sapiens-wt/LBR/2014/Makona-LIBR10245
sGP Zaire ebolavirus.	ALG01577.1	930627481	364	Liberia	01-Jul-2014	Ebola virus/H.sapiens-wt/LBR/2014/Makona-LIBR10245
virion spike glycoprotein precursor Zaire ebolavirus.	ALG01576.1	930627480	676	Liberia	01-Jul-2014	Ebola virus/H.sapiens-wt/LBR/2014/Makona-LIBR10245
ssGP Zaire ebolavirus.	ALG01569.1	930627472	297	Liberia	22-Aug-2014	Ebola virus/H.sapiens-wt/LBR/2014/Makona-LIBR10101
sGP Zaire ebolavirus.	ALG01568.1	930627471	364	Liberia	22-Aug-2014	Ebola virus/H.sapiens-wt/LBR/2014/Makona-LIBR10101
virion spike glycoprotein precursor Zaire ebolavirus.	ALG01567.1	930627470	676	Liberia	22-Aug-2014	Ebola virus/H.sapiens-wt/LBR/2014/Makona-LIBR10101
ssGP Zaire ebolavirus.	ALG01560.1	930627462	297	Liberia: Montserrado	10-Nov-2014	Ebola virus/H.sapiens-wt/LBR/2014/Makona-LIBR0112
sGP Zaire ebolavirus.	ALG01559.1	930627461	364	Liberia: Montserrado	10-Nov-2014	Ebola virus/H.sapiens-wt/LBR/2014/Makona-LIBR0112
virion spike glycoprotein precursor Zaire ebolavirus.	ALG01558.1	930627460	676	Liberia: Montserrado	10-Nov-2014	Ebola virus/H.sapiens-wt/LBR/2014/Makona-LIBR0112
ssGP Zaire ebolavirus.	ALG01551.1	930627452	297	Liberia: Montserrado	19-Sep-2014	Ebola virus/H.sapiens-wt/LBR/2014/Makona-LIBR10208
sGP Zaire ebolavirus.	ALG01550.1	930627451	364	Liberia: Montserrado	19-Sep-2014	Ebola virus/H.sapiens-wt/LBR/2014/Makona-LIBR10208
virion spike glycoprotein precursor Zaire ebolavirus.	ALG01549.1	930627450	676	Liberia: Montserrado	19-Sep-2014	Ebola virus/H.sapiens-wt/LBR/2014/Makona-LIBR10208
ssGP Zaire ebolavirus.	ALG01542.1	930627442	297	Liberia: Grand Cape Mount	22-Nov-2014	Ebola virus/H.sapiens-wt/LBR/2014/Makona-LIBR0284
sGP Zaire ebolavirus.	ALG01541.1	930627441	364	Liberia: Grand Cape Mount	22-Nov-2014	Ebola virus/H.sapiens-wt/LBR/2014/Makona-LIBR0284
virion spike glycoprotein precursor Zaire ebolavirus.	ALG01540.1	930627440	676	Liberia: Grand Cape Mount	22-Nov-2014	Ebola virus/H.sapiens-wt/LBR/2014/Makona-LIBR0284
ssGP Zaire ebolavirus.	ALG01533.1	930627432	297	Liberia: Montserrado	13-Nov-2014	Ebola virus/H.sapiens-wt/LBR/2014/Makona-LIBR0159
sGP Zaire ebolavirus.	ALG01532.1	930627431	364	Liberia: Montserrado	13-Nov-2014	Ebola virus/H.sapiens-wt/LBR/2014/Makona-LIBR0159
virion spike glycoprotein precursor Zaire ebolavirus.	ALG01531.1	930627430	676	Liberia: Montserrado	13-Nov-2014	Ebola virus/H.sapiens-wt/LBR/2014/Makona-LIBR0159
ssGP Zaire ebolavirus.	ALG01524.1	930627422	297	Liberia: Margibi	26-Aug-2014	Ebola virus/H.sapiens-wt/LBR/2014/Makona-LIBR10077
sGP Zaire ebolavirus.	ALG01523.1	930627421	364	Liberia: Margibi	26-Aug-2014	Ebola virus/H.sapiens-wt/LBR/2014/Makona-LIBR10077
virion spike glycoprotein precursor Zaire ebolavirus.	ALG01522.1	930627420	676	Liberia: Margibi	26-Aug-2014	Ebola virus/H.sapiens-wt/LBR/2014/Makona-LIBR10077
ssGP Zaire ebolavirus.	ALG01515.1	930627412	297	Liberia	20-Sep-2014	Ebola virus/H.sapiens-wt/LBR/2014/Makona-LIBR10074
sGP Zaire ebolavirus.	ALG01514.1	930627411	364	Liberia	20-Sep-2014	Ebola virus/H.sapiens-wt/LBR/2014/Makona-LIBR10074
virion spike glycoprotein precursor Zaire ebolavirus.	ALG01513.1	930627410	676	Liberia	20-Sep-2014	Ebola virus/H.sapiens-wt/LBR/2014/Makona-LIBR10074
ssGP Zaire ebolavirus.	ALG01506.1	930627402	297	Liberia	19-Jul-2014	Ebola virus/H.sapiens-wt/LBR/2014/Makona-LIBR10239
sGP Zaire ebolavirus.	ALG01505.1	930627401	364	Liberia	19-Jul-2014	Ebola virus/H.sapiens-wt/LBR/2014/Makona-LIBR10239
virion spike glycoprotein precursor Zaire ebolavirus.	ALG01504.1	930627400	676	Liberia	19-Jul-2014	Ebola virus/H.sapiens-wt/LBR/2014/Makona-LIBR10239
ssGP Zaire ebolavirus.	ALG01497.1	930627392	297	Liberia	29-Sep-2014	Ebola virus/H.sapiens-wt/LBR/2014/Makona-LIBR10217
sGP Zaire ebolavirus.	ALG01496.1	930627391	364	Liberia	29-Sep-2014	Ebola virus/H.sapiens-wt/LBR/2014/Makona-LIBR10217
virion spike glycoprotein precursor Zaire ebolavirus.	ALG01495.1	930627390	676	Liberia	29-Sep-2014	Ebola virus/H.sapiens-wt/LBR/2014/Makona-LIBR10217
ssGP Zaire ebolavirus.	ALG01488.1	930627382	297	Liberia	18-Jul-2014	Ebola virus/H.sapiens-wt/LBR/2014/Makona-LIBR10238
sGP Zaire ebolavirus.	ALG01487.1	930627381	364	Liberia	18-Jul-2014	Ebola virus/H.sapiens-wt/LBR/2014/Makona-LIBR10238
virion spike glycoprotein precursor Zaire ebolavirus.	ALG01486.1	930627380	676	Liberia	18-Jul-2014	Ebola virus/H.sapiens-wt/LBR/2014/Makona-LIBR10238
ssGP Zaire ebolavirus.	ALG01479.1	930627372	297	Liberia: Montserrado	19-Sep-2014	Ebola virus/H.sapiens-wt/LBR/2014/Makona-LIBR10210
sGP Zaire ebolavirus.	ALG01478.1	930627371	364	Liberia: Montserrado	19-Sep-2014	Ebola virus/H.sapiens-wt/LBR/2014/Makona-LIBR10210
virion spike glycoprotein precursor Zaire ebolavirus.	ALG01477.1	930627370	676	Liberia: Montserrado	19-Sep-2014	Ebola virus/H.sapiens-wt/LBR/2014/Makona-LIBR10210
ssGP Zaire ebolavirus.	ALG01470.1	930627362	297	Liberia	24-Jun-2014	Ebola virus/H.sapiens-wt/LBR/2014/Makona-LIBR10240
sGP Zaire ebolavirus.	ALG01469.1	930627361	364	Liberia	24-Jun-2014	Ebola virus/H.sapiens-wt/LBR/2014/Makona-LIBR10240
virion spike glycoprotein precursor Zaire ebolavirus.	ALG01468.1	930627360	676	Liberia	24-Jun-2014	Ebola virus/H.sapiens-wt/LBR/2014/Makona-LIBR10240
ssGP Zaire ebolavirus.	ALG01461.1	930627352	297	Liberia: Grand Kru	15-Sep-2014	Ebola virus/H.sapiens-wt/LBR/2014/Makona-LIBR10251
sGP Zaire ebolavirus.	ALG01460.1	930627351	364	Liberia: Grand Kru	15-Sep-2014	Ebola virus/H.sapiens-wt/LBR/2014/Makona-LIBR10251
virion spike glycoprotein precursor Zaire ebolavirus.	ALG01459.1	930627350	676	Liberia: Grand Kru	15-Sep-2014	Ebola virus/H.sapiens-wt/LBR/2014/Makona-LIBR10251
ssGP Zaire ebolavirus.	ALG01452.1	930627342	297	Liberia: Montserrado	13-Sep-2014	Ebola virus/H.sapiens-wt/LBR/2014/Makona-LIBR10154
sGP Zaire ebolavirus.	ALG01451.1	930627341	364	Liberia: Montserrado	13-Sep-2014	Ebola virus/H.sapiens-wt/LBR/2014/Makona-LIBR10154
virion spike glycoprotein precursor Zaire ebolavirus.	ALG01450.1	930627340	676	Liberia: Montserrado	13-Sep-2014	Ebola virus/H.sapiens-wt/LBR/2014/Makona-LIBR10154
ssGP Zaire ebolavirus.	ALG01443.1	930627332	297	Liberia	09-Sep-2014	Ebola virus/H.sapiens-wt/LBR/2014/Makona-LIBR10151
sGP Zaire ebolavirus.	ALG01442.1	930627331	364	Liberia	09-Sep-2014	Ebola virus/H.sapiens-wt/LBR/2014/Makona-LIBR10151
virion spike glycoprotein precursor Zaire ebolavirus.	ALG01441.1	930627330	676	Liberia	09-Sep-2014	Ebola virus/H.sapiens-wt/LBR/2014/Makona-LIBR10151
ssGP Zaire ebolavirus.	ALG01434.1	930627322	297	Liberia	21-Aug-2014	Ebola virus/H.sapiens-wt/LBR/2014/Makona-LIBR10008
sGP Zaire ebolavirus.	ALG01433.1	930627321	364	Liberia	21-Aug-2014	Ebola virus/H.sapiens-wt/LBR/2014/Makona-LIBR10008
virion spike glycoprotein precursor Zaire ebolavirus.	ALG01432.1	930627320	676	Liberia	21-Aug-2014	Ebola virus/H.sapiens-wt/LBR/2014/Makona-LIBR10008
ssGP Zaire ebolavirus.	ALG01425.1	930627312	297	Liberia: Margibi	16-Aug-2014	Ebola virus/H.sapiens-wt/LBR/2014/Makona-LIBR10025
sGP Zaire ebolavirus.	ALG01424.1	930627311	364	Liberia: Margibi	16-Aug-2014	Ebola virus/H.sapiens-wt/LBR/2014/Makona-LIBR10025
virion spike glycoprotein precursor Zaire ebolavirus.	ALG01423.1	930627310	676	Liberia: Margibi	16-Aug-2014	Ebola virus/H.sapiens-wt/LBR/2014/Makona-LIBR10025
ssGP Zaire ebolavirus.	ALG01416.1	930627302	297	Liberia	04-Aug-2014	Ebola virus/H.sapiens-wt/LBR/2014/Makona-LIBR10040
sGP Zaire ebolavirus.	ALG01415.1	930627301	364	Liberia	04-Aug-2014	Ebola virus/H.sapiens-wt/LBR/2014/Makona-LIBR10040
virion spike glycoprotein precursor Zaire ebolavirus.	ALG01414.1	930627300	676	Liberia	04-Aug-2014	Ebola virus/H.sapiens-wt/LBR/2014/Makona-LIBR10040
ssGP Zaire ebolavirus.	ALG01407.1	930627292	297	Liberia: Montserrado	31-Oct-2014	Ebola virus/H.sapiens-wt/LBR/2014/Makona-LIBR0008
sGP Zaire ebolavirus.	ALG01406.1	930627291	364	Liberia: Montserrado	31-Oct-2014	Ebola virus/H.sapiens-wt/LBR/2014/Makona-LIBR0008
virion spike glycoprotein precursor Zaire ebolavirus.	ALG01405.1	930627290	676	Liberia: Montserrado	31-Oct-2014	Ebola virus/H.sapiens-wt/LBR/2014/Makona-LIBR0008
ssGP Zaire ebolavirus.	ALG01398.1	930627282	297	Liberia	18-Oct-2014	Ebola virus/H.sapiens-wt/LBR/2014/Makona-LIBR10265
sGP Zaire ebolavirus.	ALG01397.1	930627281	364	Liberia	18-Oct-2014	Ebola virus/H.sapiens-wt/LBR/2014/Makona-LIBR10265
virion spike glycoprotein precursor Zaire ebolavirus.	ALG01396.1	930627280	676	Liberia	18-Oct-2014	Ebola virus/H.sapiens-wt/LBR/2014/Makona-LIBR10265
ssGP Zaire ebolavirus.	ALG01389.1	930627272	297	Liberia	10-Aug-2014	Ebola virus/H.sapiens-wt/LBR/2014/Makona-LIBR10037
sGP Zaire ebolavirus.	ALG01388.1	930627271	364	Liberia	10-Aug-2014	Ebola virus/H.sapiens-wt/LBR/2014/Makona-LIBR10037
virion spike glycoprotein precursor Zaire ebolavirus.	ALG01387.1	930627270	676	Liberia	10-Aug-2014	Ebola virus/H.sapiens-wt/LBR/2014/Makona-LIBR10037
ssGP Zaire ebolavirus.	ALG01380.1	930627262	297	Liberia: Montserrado	02-Oct-2014	Ebola virus/H.sapiens-wt/LBR/2014/Makona-LIBR10307
sGP Zaire ebolavirus.	ALG01379.1	930627261	364	Liberia: Montserrado	02-Oct-2014	Ebola virus/H.sapiens-wt/LBR/2014/Makona-LIBR10307
virion spike glycoprotein precursor Zaire ebolavirus.	ALG01378.1	930627260	676	Liberia: Montserrado	02-Oct-2014	Ebola virus/H.sapiens-wt/LBR/2014/Makona-LIBR10307
ssGP Zaire ebolavirus.	ALG01371.1	930627252	297	Liberia: Grand Bassa	26-Aug-2014	Ebola virus/H.sapiens-wt/LBR/2014/Makona-LIBR10079
sGP Zaire ebolavirus.	ALG01370.1	930627251	364	Liberia: Grand Bassa	26-Aug-2014	Ebola virus/H.sapiens-wt/LBR/2014/Makona-LIBR10079
virion spike glycoprotein precursor Zaire ebolavirus.	ALG01369.1	930627250	676	Liberia: Grand Bassa	26-Aug-2014	Ebola virus/H.sapiens-wt/LBR/2014/Makona-LIBR10079
ssGP Zaire ebolavirus.	ALG01362.1	930627242	297	Liberia: Montserrado	20-Sep-2014	Ebola virus/H.sapiens-wt/LBR/2014/Makona-LIBR10071
sGP Zaire ebolavirus.	ALG01361.1	930627241	364	Liberia: Montserrado	20-Sep-2014	Ebola virus/H.sapiens-wt/LBR/2014/Makona-LIBR10071
virion spike glycoprotein precursor Zaire ebolavirus.	ALG01360.1	930627240	676	Liberia: Montserrado	20-Sep-2014	Ebola virus/H.sapiens-wt/LBR/2014/Makona-LIBR10071
ssGP Zaire ebolavirus.	ALG01353.1	930627232	297	Liberia: Montserrado	20-Sep-2014	Ebola virus/H.sapiens-wt/LBR/2014/Makona-LIBR10072
sGP Zaire ebolavirus.	ALG01352.1	930627231	364	Liberia: Montserrado	20-Sep-2014	Ebola virus/H.sapiens-wt/LBR/2014/Makona-LIBR10072
virion spike glycoprotein precursor Zaire ebolavirus.	ALG01351.1	930627230	676	Liberia: Montserrado	20-Sep-2014	Ebola virus/H.sapiens-wt/LBR/2014/Makona-LIBR10072
ssGP Zaire ebolavirus.	ALG01344.1	930627222	297	Liberia: Montserrado	27-Aug-2014	Ebola virus/H.sapiens-wt/LBR/2014/Makona-LIBR10201
sGP Zaire ebolavirus.	ALG01343.1	930627221	364	Liberia: Montserrado	27-Aug-2014	Ebola virus/H.sapiens-wt/LBR/2014/Makona-LIBR10201
virion spike glycoprotein precursor Zaire ebolavirus.	ALG01342.1	930627220	676	Liberia: Montserrado	27-Aug-2014	Ebola virus/H.sapiens-wt/LBR/2014/Makona-LIBR10201
ssGP Zaire ebolavirus.	ALG01335.1	930627212	297	Liberia: Grand Bassa	26-Sep-2014	Ebola virus/H.sapiens-wt/LBR/2014/Makona-LIBR10222
sGP Zaire ebolavirus.	ALG01334.1	930627211	364	Liberia: Grand Bassa	26-Sep-2014	Ebola virus/H.sapiens-wt/LBR/2014/Makona-LIBR10222
virion spike glycoprotein precursor Zaire ebolavirus.	ALG01333.1	930627210	676	Liberia: Grand Bassa	26-Sep-2014	Ebola virus/H.sapiens-wt/LBR/2014/Makona-LIBR10222
ssGP Zaire ebolavirus.	ALG01326.1	930627202	297	Liberia: Montserrado	26-Sep-2014	Ebola virus/H.sapiens-wt/LBR/2014/Makona-LIBR10226
sGP Zaire ebolavirus.	ALG01325.1	930627201	364	Liberia: Montserrado	26-Sep-2014	Ebola virus/H.sapiens-wt/LBR/2014/Makona-LIBR10226
virion spike glycoprotein precursor Zaire ebolavirus.	ALG01324.1	930627200	676	Liberia: Montserrado	26-Sep-2014	Ebola virus/H.sapiens-wt/LBR/2014/Makona-LIBR10226
ssGP Zaire ebolavirus.	ALG01317.1	930627192	297	Liberia: Grand Bassa	06-Nov-2014	Ebola virus/H.sapiens-wt/LBR/2014/Makona-LIBR0071
sGP Zaire ebolavirus.	ALG01316.1	930627191	364	Liberia: Grand Bassa	06-Nov-2014	Ebola virus/H.sapiens-wt/LBR/2014/Makona-LIBR0071
virion spike glycoprotein precursor Zaire ebolavirus.	ALG01315.1	930627190	676	Liberia: Grand Bassa	06-Nov-2014	Ebola virus/H.sapiens-wt/LBR/2014/Makona-LIBR0071
ssGP Zaire ebolavirus.	ALG01308.1	930627182	297	Liberia: Montserrado	26-Sep-2014	Ebola virus/H.sapiens-wt/LBR/2014/Makona-LIBR10224
sGP Zaire ebolavirus.	ALG01307.1	930627181	364	Liberia: Montserrado	26-Sep-2014	Ebola virus/H.sapiens-wt/LBR/2014/Makona-LIBR10224
virion spike glycoprotein precursor Zaire ebolavirus.	ALG01306.1	930627180	676	Liberia: Montserrado	26-Sep-2014	Ebola virus/H.sapiens-wt/LBR/2014/Makona-LIBR10224
ssGP Zaire ebolavirus.	ALG01299.1	930627172	297	Liberia: Montserrado	26-Sep-2014	Ebola virus/H.sapiens-wt/LBR/2014/Makona-LIBR10223
sGP Zaire ebolavirus.	ALG01298.1	930627171	364	Liberia: Montserrado	26-Sep-2014	Ebola virus/H.sapiens-wt/LBR/2014/Makona-LIBR10223
virion spike glycoprotein precursor Zaire ebolavirus.	ALG01297.1	930627170	676	Liberia: Montserrado	26-Sep-2014	Ebola virus/H.sapiens-wt/LBR/2014/Makona-LIBR10223
ssGP Zaire ebolavirus.	ALG01290.1	930627162	297	Liberia: Margibi	26-Aug-2014	Ebola virus/H.sapiens-wt/LBR/2014/Makona-LIBR10082
sGP Zaire ebolavirus.	ALG01289.1	930627161	364	Liberia: Margibi	26-Aug-2014	Ebola virus/H.sapiens-wt/LBR/2014/Makona-LIBR10082
virion spike glycoprotein precursor Zaire ebolavirus.	ALG01288.1	930627160	676	Liberia: Margibi	26-Aug-2014	Ebola virus/H.sapiens-wt/LBR/2014/Makona-LIBR10082
ssGP Zaire ebolavirus.	ALG01281.1	930627152	297	Liberia	10-Aug-2014	Ebola virus/H.sapiens-wt/LBR/2014/Makona-LIBR10036
sGP Zaire ebolavirus.	ALG01280.1	930627151	364	Liberia	10-Aug-2014	Ebola virus/H.sapiens-wt/LBR/2014/Makona-LIBR10036
virion spike glycoprotein precursor Zaire ebolavirus.	ALG01279.1	930627150	676	Liberia	10-Aug-2014	Ebola virus/H.sapiens-wt/LBR/2014/Makona-LIBR10036
ssGP Zaire ebolavirus.	ALG01272.1	930627142	297	Liberia	21-Sep-2014	Ebola virus/H.sapiens-wt/LBR/2014/Makona-LIBR10065
sGP Zaire ebolavirus.	ALG01271.1	930627141	364	Liberia	21-Sep-2014	Ebola virus/H.sapiens-wt/LBR/2014/Makona-LIBR10065
virion spike glycoprotein precursor Zaire ebolavirus.	ALG01270.1	930627140	676	Liberia	21-Sep-2014	Ebola virus/H.sapiens-wt/LBR/2014/Makona-LIBR10065
ssGP Zaire ebolavirus.	ALF04553.1	929047219	297	Sierra Leone	17-Sep-2014	Ebola virus/H.sapiens-wt/SLE/2014/Makona-201403164
sGP Zaire ebolavirus.	ALF04552.1	929047218	364	Sierra Leone	17-Sep-2014	Ebola virus/H.sapiens-wt/SLE/2014/Makona-201403164
virion spike glycoprotein precursor Zaire ebolavirus.	ALF04551.1	929047217	676	Sierra Leone	17-Sep-2014	Ebola virus/H.sapiens-wt/SLE/2014/Makona-201403164
ssGP Zaire ebolavirus.	ALF04544.1	929047209	297	Sierra Leone	07-Sep-2014	Ebola virus/H. sapiens-wt/SLE/2014/Makona-201409581
sGP Zaire ebolavirus.	ALF04543.1	929047208	364	Sierra Leone	07-Sep-2014	Ebola virus/H. sapiens-wt/SLE/2014/Makona-201409581
virion spike glycoprotein precursor Zaire ebolavirus.	ALF04542.1	929047207	676	Sierra Leone	07-Sep-2014	Ebola virus/H. sapiens-wt/SLE/2014/Makona-201409581
ssGP Zaire ebolavirus.	AIZ50429.1	731187658	297	USA	13-Oct-2014	Ebola virus/H.sapiens-wt/USA/2014/Makona-201403305
sGP Zaire ebolavirus.	AIZ50428.1	731187657	364	USA	13-Oct-2014	Ebola virus/H.sapiens-wt/USA/2014/Makona-201403305
virion spike glycoprotein precursor Zaire ebolavirus.	AIZ50427.1	731187656	676	USA	13-Oct-2014	Ebola virus/H.sapiens-wt/USA/2014/Makona-201403305
ssGP Zaire ebolavirus.	AIZ50420.1	731187648	297	USA	11-Oct-2014	Ebola virus/H.sapiens-wt/USA/2014/Makona-201403293
sGP Zaire ebolavirus.	AIZ50419.1	731187647	364	USA	11-Oct-2014	Ebola virus/H.sapiens-wt/USA/2014/Makona-201403293
virion spike glycoprotein precursor Zaire ebolavirus.	AIZ50418.1	731187646	676	USA	11-Oct-2014	Ebola virus/H.sapiens-wt/USA/2014/Makona-201403293
ssGP Zaire ebolavirus.	AIZ50411.1	731187638	297	Liberia	06-Oct-2014	Ebola virus/H.sapiens-wt/LBR/2014/Makona-201403275
sGP Zaire ebolavirus.	AIZ50410.1	731187637	364	Liberia	06-Oct-2014	Ebola virus/H.sapiens-wt/LBR/2014/Makona-201403275
virion spike glycoprotein precursor Zaire ebolavirus.	AIZ50409.1	731187636	676	Liberia	06-Oct-2014	Ebola virus/H.sapiens-wt/LBR/2014/Makona-201403275
ssGP Zaire ebolavirus.	AIZ50402.1	731187628	297	Liberia	26-Sep-2014	Ebola virus/H.sapiens-wt/LBR/2014/Makona-201403261
sGP Zaire ebolavirus.	AIZ50401.1	731187627	364	Liberia	26-Sep-2014	Ebola virus/H.sapiens-wt/LBR/2014/Makona-201403261
virion spike glycoprotein precursor Zaire ebolavirus.	AIZ50400.1	731187626	676	Liberia	26-Sep-2014	Ebola virus/H.sapiens-wt/LBR/2014/Makona-201403261
ssGP Zaire ebolavirus.	AIZ50393.1	731187618	297	Sierra Leone	13-Sep-2014	Ebola virus/H.sapiens-wt/SLE/2014/Makona-201403147
sGP Zaire ebolavirus.	AIZ50392.1	731187617	364	Sierra Leone	13-Sep-2014	Ebola virus/H.sapiens-wt/SLE/2014/Makona-201403147
virion spike glycoprotein precursor Zaire ebolavirus.	AIZ50391.1	731187616	676	Sierra Leone	13-Sep-2014	Ebola virus/H.sapiens-wt/SLE/2014/Makona-201403147
ssGP Zaire ebolavirus.	AKL91129.1	831182912	297	Guinea: Kissidougou	17-Mar-2014	Ebola virus/H.sapiens-wt/GIN/2014/Makona-C15
sGP Zaire ebolavirus.	AKL91128.1	831182911	364	Guinea: Kissidougou	17-Mar-2014	Ebola virus/H.sapiens-wt/GIN/2014/Makona-C15
virion spike glycoprotein precursor Zaire ebolavirus.	AKL91127.1	831182910	676	Guinea: Kissidougou	17-Mar-2014	Ebola virus/H.sapiens-wt/GIN/2014/Makona-C15
ssGP Zaire ebolavirus.	AKL91120.1	831182902	297	Guinea: Kissidougou	17-Mar-2014	Ebola virus/H.sapiens-wt/GIN/2014/Makona-C15
sGP Zaire ebolavirus.	AKL91119.1	831182901	364	Guinea: Kissidougou	17-Mar-2014	Ebola virus/H.sapiens-wt/GIN/2014/Makona-C15
virion spike glycoprotein precursor Zaire ebolavirus.	AKL91118.1	831182900	676	Guinea: Kissidougou	17-Mar-2014	Ebola virus/H.sapiens-wt/GIN/2014/Makona-C15
ssGP Zaire ebolavirus.	AKL91111.1	831182892	297	Guinea: Gueckedou	20-Mar-2014	Ebola virus/H.sapiens-wt/GIN/2014/Makona-C07
sGP Zaire ebolavirus.	AKL91110.1	831182891	364	Guinea: Gueckedou	20-Mar-2014	Ebola virus/H.sapiens-wt/GIN/2014/Makona-C07
virion spike glycoprotein precursor Zaire ebolavirus.	AKL91109.1	831182890	676	Guinea: Gueckedou	20-Mar-2014	Ebola virus/H.sapiens-wt/GIN/2014/Makona-C07
ssGP Zaire ebolavirus.	AKL91102.1	831182882	297	Guinea: Gueckedou	20-Mar-2014	Ebola virus/H.sapiens-wt/GIN/2014/Makona-C07
sGP Zaire ebolavirus.	AKL91101.1	831182881	364	Guinea: Gueckedou	20-Mar-2014	Ebola virus/H.sapiens-wt/GIN/2014/Makona-C07
virion spike glycoprotein precursor Zaire ebolavirus.	AKL91100.1	831182880	676	Guinea: Gueckedou	20-Mar-2014	Ebola virus/H.sapiens-wt/GIN/2014/Makona-C07
ssGP Zaire ebolavirus.	AKL91093.1	831182872	297	Guinea: Gueckedou	19-Mar-2014	Ebola virus/H.sapiens-wt/GIN/2014/Makona-C05
sGP Zaire ebolavirus.	AKL91092.1	831182871	364	Guinea: Gueckedou	19-Mar-2014	Ebola virus/H.sapiens-wt/GIN/2014/Makona-C05
virion spike glycoprotein precursor Zaire ebolavirus.	AKL91091.1	831182870	676	Guinea: Gueckedou	19-Mar-2014	Ebola virus/H.sapiens-wt/GIN/2014/Makona-C05
ssGP Zaire ebolavirus.	AKL91084.1	831182862	297	Guinea: Gueckedou	19-Mar-2014	Ebola virus/H.sapiens-wt/GIN/2014/Makona-C05
sGP Zaire ebolavirus.	AKL91083.1	831182861	364	Guinea: Gueckedou	19-Mar-2014	Ebola virus/H.sapiens-wt/GIN/2014/Makona-C05
virion spike glycoprotein precursor Zaire ebolavirus.	AKL91082.1	831182860	676	Guinea: Gueckedou	19-Mar-2014	Ebola virus/H.sapiens-wt/GIN/2014/Makona-C05
ssGP Zaire ebolavirus.	ALX34565.1	973435239	297	Sierra Leone	31-May-2015	Ebola virus/H.sapiens-wt/SLE/2015/Makona-0806_C1_PL7496
sGP Zaire ebolavirus.	ALX34564.1	973435238	364	Sierra Leone	31-May-2015	Ebola virus/H.sapiens-wt/SLE/2015/Makona-0806_C1_PL7496
virion spike glycoprotein precursor Zaire ebolavirus.	ALX34563.1	973435237	676	Sierra Leone	31-May-2015	Ebola virus/H.sapiens-wt/SLE/2015/Makona-0806_C1_PL7496
ssGP Zaire ebolavirus.	ALX34539.1	973435209	297	Sierra Leone	24-Feb-2015	Ebola virus/H.sapiens-wt/SLE/2015/Makona-2104_C1_MK2362
sGP Zaire ebolavirus.	ALX34538.1	973435208	364	Sierra Leone	24-Feb-2015	Ebola virus/H.sapiens-wt/SLE/2015/Makona-2104_C1_MK2362
ssGP Zaire ebolavirus.	ALX34531.1	973435200	297	Sierra Leone	12-Mar-2015	Ebola virus/H.sapiens-wt/SLE/2015/Makona-0305_C1_PL4651
sGP Zaire ebolavirus.	ALX34530.1	973435199	364	Sierra Leone	12-Mar-2015	Ebola virus/H.sapiens-wt/SLE/2015/Makona-0305_C1_PL4651
ssGP Zaire ebolavirus.	ALX34523.1	973435191	297	Sierra Leone	03-Mar-2015	Ebola virus/H.sapiens-wt/SLE/2015/Makona-0507_C1_PL4283
sGP Zaire ebolavirus.	ALX34522.1	973435190	364	Sierra Leone	03-Mar-2015	Ebola virus/H.sapiens-wt/SLE/2015/Makona-0507_C1_PL4283
ssGP Zaire ebolavirus.	ALX34515.1	973435182	297	Sierra Leone	12-Jan-2015	Ebola virus/H.sapiens-wt/SLE/2015/Makona-2507_C1_77756_EMLK
sGP Zaire ebolavirus.	ALX34514.1	973435181	364	Sierra Leone	12-Jan-2015	Ebola virus/H.sapiens-wt/SLE/2015/Makona-2507_C1_77756_EMLK
virion spike glycoprotein precursor Zaire ebolavirus.	ALX34513.1	973435180	676	Sierra Leone	12-Jan-2015	Ebola virus/H.sapiens-wt/SLE/2015/Makona-2507_C1_77756_EMLK
ssGP Zaire ebolavirus.	ALX34506.1	973435172	297	Sierra Leone	10-Jul-2015	Ebola virus/H.sapiens-wt/SLE/2015/Makona-1507_C1_18660_EMLH
sGP Zaire ebolavirus.	ALX34505.1	973435171	364	Sierra Leone	10-Jul-2015	Ebola virus/H.sapiens-wt/SLE/2015/Makona-1507_C1_18660_EMLH
ssGP Zaire ebolavirus.	ALX34498.1	973435163	297	Sierra Leone	29-May-2015	Ebola virus/H.sapiens-wt/SLE/2015/Makona-0806_C1_PL7451
sGP Zaire ebolavirus.	ALX34497.1	973435162	364	Sierra Leone	29-May-2015	Ebola virus/H.sapiens-wt/SLE/2015/Makona-0806_C1_PL7451
ssGP Zaire ebolavirus.	ALX34484.1	973435147	297	Sierra Leone	24-Dec-2014	Ebola virus/H.sapiens-wt/SLE/2014/Makona-1807_C1_MK0464
sGP Zaire ebolavirus.	ALX34483.1	973435146	364	Sierra Leone	24-Dec-2014	Ebola virus/H.sapiens-wt/SLE/2014/Makona-1807_C1_MK0464
virion spike glycoprotein precursor Zaire ebolavirus.	ALX34482.1	973435145	676	Sierra Leone	24-Dec-2014	Ebola virus/H.sapiens-wt/SLE/2014/Makona-1807_C1_MK0464
ssGP Zaire ebolavirus.	ALX34469.1	973435130	297	Sierra Leone	22-Feb-2015	Ebola virus/H.sapiens-wt/SLE/2015/Makona-1708_C2_MK2283R
sGP Zaire ebolavirus.	ALX34468.1	973435129	364	Sierra Leone	22-Feb-2015	Ebola virus/H.sapiens-wt/SLE/2015/Makona-1708_C2_MK2283R
ssGP Zaire ebolavirus.	ALX34461.1	973435121	297	Sierra Leone	25-Feb-2015	Ebola virus/H.sapiens-wt/SLE/2015/Makona-1105_C2_MK2369
sGP Zaire ebolavirus.	ALX34460.1	973435120	364	Sierra Leone	25-Feb-2015	Ebola virus/H.sapiens-wt/SLE/2015/Makona-1105_C2_MK2369
ssGP Zaire ebolavirus.	ALX34398.1	973435047	297	Sierra Leone	07-Sep-2015	Ebola virus/H.sapiens-wt/SLE/2015/Makona-0809_C1_19560_EMLK_E
sGP Zaire ebolavirus.	ALX34397.1	973435046	364	Sierra Leone	07-Sep-2015	Ebola virus/H.sapiens-wt/SLE/2015/Makona-0809_C1_19560_EMLK_E
ssGP Zaire ebolavirus.	ALX34384.1	973435031	297	Sierra Leone	27-May-2015	Ebola virus/H.sapiens-wt/SLE/2015/Makona-0806_C1_PL7401
sGP Zaire ebolavirus.	ALX34383.1	973435030	364	Sierra Leone	27-May-2015	Ebola virus/H.sapiens-wt/SLE/2015/Makona-0806_C1_PL7401
virion spike glycoprotein precursor Zaire ebolavirus.	ALX34382.1	973435029	676	Sierra Leone	27-May-2015	Ebola virus/H.sapiens-wt/SLE/2015/Makona-0806_C1_PL7401
ssGP Zaire ebolavirus.	ALX34358.1	973435001	297	Sierra Leone	11-Jan-2015	Ebola virus/H.sapiens-wt/SLE/2015/Makona-0806_C1_MK1079
sGP Zaire ebolavirus.	ALX34357.1	973435000	364	Sierra Leone	11-Jan-2015	Ebola virus/H.sapiens-wt/SLE/2015/Makona-0806_C1_MK1079
virion spike glycoprotein precursor Zaire ebolavirus.	ALX34356.1	973434999	676	Sierra Leone	11-Jan-2015	Ebola virus/H.sapiens-wt/SLE/2015/Makona-0806_C1_MK1079
ssGP Zaire ebolavirus.	ALX34333.1	973434972	297	Sierra Leone	25-Jan-2015	Ebola virus/H.sapiens-wt/SLE/2015/Makona-2507_C2_10132_EMLK
sGP Zaire ebolavirus.	ALX34332.1	973434971	364	Sierra Leone	25-Jan-2015	Ebola virus/H.sapiens-wt/SLE/2015/Makona-2507_C2_10132_EMLK
ssGP Zaire ebolavirus.	ALX34256.1	973434882	297	Sierra Leone	14-Mar-2015	Ebola virus/H.sapiens-wt/SLE/2015/Makona-0807_C1_PL4813
sGP Zaire ebolavirus.	ALX34255.1	973434881	364	Sierra Leone	14-Mar-2015	Ebola virus/H.sapiens-wt/SLE/2015/Makona-0807_C1_PL4813
ssGP Zaire ebolavirus.	ALX34248.1	973434873	297	Sierra Leone	27-Jan-2015	Ebola virus/H.sapiens-wt/SLE/2015/Makona-3007_C1_448_EMLH
sGP Zaire ebolavirus.	ALX34247.1	973434872	364	Sierra Leone	27-Jan-2015	Ebola virus/H.sapiens-wt/SLE/2015/Makona-3007_C1_448_EMLH
ssGP Zaire ebolavirus.	ALX34216.1	973434836	297	Sierra Leone	06-Feb-2015	Ebola virus/H.sapiens-wt/SLE/2015/Makona-1007_C1_MK1782
sGP Zaire ebolavirus.	ALX34215.1	973434835	364	Sierra Leone	06-Feb-2015	Ebola virus/H.sapiens-wt/SLE/2015/Makona-1007_C1_MK1782
ssGP Zaire ebolavirus.	ALX34173.1	973434786	297	Sierra Leone	31-Jan-2015	Ebola virus/H.sapiens-wt/SLE/2015/Makona-2507_C2_10212_EMLK
sGP Zaire ebolavirus.	ALX34172.1	973434785	364	Sierra Leone	31-Jan-2015	Ebola virus/H.sapiens-wt/SLE/2015/Makona-2507_C2_10212_EMLK
ssGP Zaire ebolavirus.	ALX34153.1	973434763	297	Sierra Leone	12-Mar-2015	Ebola virus/H.sapiens-wt/SLE/2015/Makona-0507_C1_PL4671
sGP Zaire ebolavirus.	ALX34152.1	973434762	364	Sierra Leone	12-Mar-2015	Ebola virus/H.sapiens-wt/SLE/2015/Makona-0507_C1_PL4671
ssGP Zaire ebolavirus.	ALX34145.1	973434754	297	Sierra Leone	22-Jan-2015	Ebola virus/H.sapiens-wt/SLE/2015/Makona-2507_C2_10080_EMLK
sGP Zaire ebolavirus.	ALX34144.1	973434753	364	Sierra Leone	22-Jan-2015	Ebola virus/H.sapiens-wt/SLE/2015/Makona-2507_C2_10080_EMLK
ssGP Zaire ebolavirus.	ALX34137.1	973434745	297	Sierra Leone	18-Feb-2015	Ebola virus/H.sapiens-wt/SLE/2015/Makona-2607_C1_12106_EMLH
sGP Zaire ebolavirus.	ALX34136.1	973434744	364	Sierra Leone	18-Feb-2015	Ebola virus/H.sapiens-wt/SLE/2015/Makona-2607_C1_12106_EMLH
ssGP Zaire ebolavirus.	ALX34111.1	973434715	297	Sierra Leone	09-Dec-2014	Ebola virus/H.sapiens-wt/SLE/2014/Makona-1007_C2_MK0045
sGP Zaire ebolavirus.	ALX34110.1	973434714	364	Sierra Leone	09-Dec-2014	Ebola virus/H.sapiens-wt/SLE/2014/Makona-1007_C2_MK0045
ssGP Zaire ebolavirus.	ALX34104.1	973434707	297	Sierra Leone	28-Aug-2015	Ebola virus/H.sapiens-wt/SLE/2015/Makona-0109_C2_020380_EMLK
sGP Zaire ebolavirus.	ALX34103.1	973434706	364	Sierra Leone	28-Aug-2015	Ebola virus/H.sapiens-wt/SLE/2015/Makona-0109_C2_020380_EMLK
ssGP Zaire ebolavirus.	ALX34092.1	973434693	297	Sierra Leone	29-Jan-2015	Ebola virus/H.sapiens-wt/SLE/2015/Makona-2807_C1_468_EMLH
sGP Zaire ebolavirus.	ALX34091.1	973434692	364	Sierra Leone	29-Jan-2015	Ebola virus/H.sapiens-wt/SLE/2015/Makona-2807_C1_468_EMLH
virion spike glycoprotein precursor Zaire ebolavirus.	ALX34090.1	973434691	676	Sierra Leone	29-Jan-2015	Ebola virus/H.sapiens-wt/SLE/2015/Makona-2807_C1_468_EMLH
ssGP Zaire ebolavirus.	ALX34071.1	973434669	297	Sierra Leone	21-Dec-2014	Ebola virus/H.sapiens-wt/SLE/2014/Makona-1708_C1_MK0367R
sGP Zaire ebolavirus.	ALX34070.1	973434668	364	Sierra Leone	21-Dec-2014	Ebola virus/H.sapiens-wt/SLE/2014/Makona-1708_C1_MK0367R
ssGP Zaire ebolavirus.	ALX34063.1	973434660	297	Sierra Leone	19-Apr-2015	Ebola virus/H.sapiens-wt/SLE/2015/Makona-0807_C1_14748_EMLK
sGP Zaire ebolavirus.	ALX34062.1	973434659	364	Sierra Leone	19-Apr-2015	Ebola virus/H.sapiens-wt/SLE/2015/Makona-0807_C1_14748_EMLK
virion spike glycoprotein precursor Zaire ebolavirus.	ALX34061.1	973434658	676	Sierra Leone	19-Apr-2015	Ebola virus/H.sapiens-wt/SLE/2015/Makona-0807_C1_14748_EMLK
ssGP Zaire ebolavirus.	ALX34042.1	973434636	297	Sierra Leone	15-Mar-2015	Ebola virus/H.sapiens-wt/SLE/2015/Makona-0807_C1_PL4804
sGP Zaire ebolavirus.	ALX34041.1	973434635	364	Sierra Leone	15-Mar-2015	Ebola virus/H.sapiens-wt/SLE/2015/Makona-0807_C1_PL4804
virion spike glycoprotein precursor Zaire ebolavirus.	ALX34040.1	973434634	676	Sierra Leone	15-Mar-2015	Ebola virus/H.sapiens-wt/SLE/2015/Makona-0807_C1_PL4804
ssGP Zaire ebolavirus.	ALX34027.1	973434619	297	Sierra Leone	24-Mar-2015	Ebola virus/H.sapiens-wt/SLE/2015/Makona-0205_C1_PL5294
sGP Zaire ebolavirus.	ALX34026.1	973434618	364	Sierra Leone	24-Mar-2015	Ebola virus/H.sapiens-wt/SLE/2015/Makona-0205_C1_PL5294
virion spike glycoprotein precursor Zaire ebolavirus.	ALX34025.1	973434617	676	Sierra Leone	24-Mar-2015	Ebola virus/H.sapiens-wt/SLE/2015/Makona-0205_C1_PL5294
ssGP Zaire ebolavirus.	ALX33998.1	973434585	297	Sierra Leone	25-Feb-2015	Ebola virus/H.sapiens-wt/SLE/2015/Makona-1105_C1_MK2427
sGP Zaire ebolavirus.	ALX33997.1	973434584	364	Sierra Leone	25-Feb-2015	Ebola virus/H.sapiens-wt/SLE/2015/Makona-1105_C1_MK2427
ssGP Zaire ebolavirus.	ALX33990.1	973434576	297	Sierra Leone	06-Jan-2015	Ebola virus/H.sapiens-wt/SLE/2015/Makona-2605_C1_MK0885
sGP Zaire ebolavirus.	ALX33989.1	973434575	364	Sierra Leone	06-Jan-2015	Ebola virus/H.sapiens-wt/SLE/2015/Makona-2605_C1_MK0885
ssGP Zaire ebolavirus.	ALX33983.1	973434568	297	Sierra Leone	15-May-2015	Ebola virus/H.sapiens-wt/SLE/2015/Makona-2005_C2_PL7053
sGP Zaire ebolavirus.	ALX33982.1	973434567	364	Sierra Leone	15-May-2015	Ebola virus/H.sapiens-wt/SLE/2015/Makona-2005_C2_PL7053
ssGP Zaire ebolavirus.	ALX33969.1	973434552	297	Sierra Leone	13-Feb-2015	Ebola virus/H.sapiens-wt/SLE/2015/Makona-1807_C2_14521_EMLK
sGP Zaire ebolavirus.	ALX33968.1	973434551	364	Sierra Leone	13-Feb-2015	Ebola virus/H.sapiens-wt/SLE/2015/Makona-1807_C2_14521_EMLK
ssGP Zaire ebolavirus.	ALX33949.1	973434529	297	Sierra Leone	28-Feb-2015	Ebola virus/H.sapiens-wt/SLE/2015/Makona-0807_C1_PL4123
sGP Zaire ebolavirus.	ALX33948.1	973434528	364	Sierra Leone	28-Feb-2015	Ebola virus/H.sapiens-wt/SLE/2015/Makona-0807_C1_PL4123
ssGP Zaire ebolavirus.	ALX33929.1	973434506	297	Sierra Leone	03-Mar-2015	Ebola virus/H.sapiens-wt/SLE/2015/Makona-1105_C1_MK2673
sGP Zaire ebolavirus.	ALX33928.1	973434505	364	Sierra Leone	03-Mar-2015	Ebola virus/H.sapiens-wt/SLE/2015/Makona-1105_C1_MK2673
ssGP Zaire ebolavirus.	ALX33904.1	973434477	297	Sierra Leone	10-Feb-2015	Ebola virus/H.sapiens-wt/SLE/2015/Makona-0208_C2_KT4828R
sGP Zaire ebolavirus.	ALX33903.1	973434476	364	Sierra Leone	10-Feb-2015	Ebola virus/H.sapiens-wt/SLE/2015/Makona-0208_C2_KT4828R
ssGP Zaire ebolavirus.	ALX33878.1	973434447	297	Sierra Leone	10-Feb-2015	Ebola virus/H.sapiens-wt/SLE/2015/Makona-1807_C2_10415_EMLK
sGP Zaire ebolavirus.	ALX33877.1	973434446	364	Sierra Leone	10-Feb-2015	Ebola virus/H.sapiens-wt/SLE/2015/Makona-1807_C2_10415_EMLK
ssGP Zaire ebolavirus.	ALX33870.1	973434438	297	Sierra Leone	27-May-2015	Ebola virus/H.sapiens-wt/SLE/2015/Makona-0806_C1_PL7376
sGP Zaire ebolavirus.	ALX33869.1	973434437	364	Sierra Leone	27-May-2015	Ebola virus/H.sapiens-wt/SLE/2015/Makona-0806_C1_PL7376
ssGP Zaire ebolavirus.	ALX33780.1	973434333	297	Sierra Leone	10-Mar-2015	Ebola virus/H.sapiens-wt/SLE/2015/Makona-2906_C1_PL4561
sGP Zaire ebolavirus.	ALX33779.1	973434332	364	Sierra Leone	10-Mar-2015	Ebola virus/H.sapiens-wt/SLE/2015/Makona-2906_C1_PL4561
ssGP Zaire ebolavirus.	ALX33773.1	973434325	297	Sierra Leone	13-Mar-2015	Ebola virus/H.sapiens-wt/SLE/2015/Makona-2208_C1_PL4736R
sGP Zaire ebolavirus.	ALX33772.1	973434324	364	Sierra Leone	13-Mar-2015	Ebola virus/H.sapiens-wt/SLE/2015/Makona-2208_C1_PL4736R
ssGP Zaire ebolavirus.	ALX33741.1	973434288	297	Sierra Leone	24-Feb-2015	Ebola virus/H.sapiens-wt/SLE/2015/Makona-2104_C1_MK2364
sGP Zaire ebolavirus.	ALX33740.1	973434287	364	Sierra Leone	24-Feb-2015	Ebola virus/H.sapiens-wt/SLE/2015/Makona-2104_C1_MK2364
ssGP Zaire ebolavirus.	ALX33727.1	973434272	297	Sierra Leone	27-Dec-2014	Ebola virus/H.sapiens-wt/SLE/2014/Makona-1807_C1_MK0551
sGP Zaire ebolavirus.	ALX33726.1	973434271	364	Sierra Leone	27-Dec-2014	Ebola virus/H.sapiens-wt/SLE/2014/Makona-1807_C1_MK0551
ssGP Zaire ebolavirus.	ALX33702.1	973434243	297	Sierra Leone	07-Mar-2015	Ebola virus/H.sapiens-wt/SLE/2015/Makona-3004_C1_KT5789
sGP Zaire ebolavirus.	ALX33701.1	973434242	364	Sierra Leone	07-Mar-2015	Ebola virus/H.sapiens-wt/SLE/2015/Makona-3004_C1_KT5789
ssGP Zaire ebolavirus.	ALX33666.1	973434201	297	Sierra Leone	06-Feb-2015	Ebola virus/H.sapiens-wt/SLE/2015/Makona-0806_C1_KT4715
sGP Zaire ebolavirus.	ALX33665.1	973434200	364	Sierra Leone	06-Feb-2015	Ebola virus/H.sapiens-wt/SLE/2015/Makona-0806_C1_KT4715
virion spike glycoprotein precursor Zaire ebolavirus.	ALX33664.1	973434199	676	Sierra Leone	06-Feb-2015	Ebola virus/H.sapiens-wt/SLE/2015/Makona-0806_C1_KT4715
ssGP Zaire ebolavirus.	ALX33645.1	973434177	297	Sierra Leone	07-Mar-2015	Ebola virus/H.sapiens-wt/SLE/2015/Makona-3004_C1_KT5788
sGP Zaire ebolavirus.	ALX33644.1	973434176	364	Sierra Leone	07-Mar-2015	Ebola virus/H.sapiens-wt/SLE/2015/Makona-3004_C1_KT5788
ssGP Zaire ebolavirus.	ALX33631.1	973434161	297	Sierra Leone	01-Mar-2015	Ebola virus/H.sapiens-wt/SLE/2015/Makona-2607_C2_12257_EMLH
sGP Zaire ebolavirus.	ALX33630.1	973434160	364	Sierra Leone	01-Mar-2015	Ebola virus/H.sapiens-wt/SLE/2015/Makona-2607_C2_12257_EMLH
ssGP Zaire ebolavirus.	ALX33611.1	973434138	297	Sierra Leone	31-Mar-2015	Ebola virus/H.sapiens-wt/SLE/2015/Makona-0205_C2_PL5674
sGP Zaire ebolavirus.	ALX33610.1	973434137	364	Sierra Leone	31-Mar-2015	Ebola virus/H.sapiens-wt/SLE/2015/Makona-0205_C2_PL5674
ssGP Zaire ebolavirus.	ALX33550.1	973434067	297	Sierra Leone	12-Mar-2015	Ebola virus/H.sapiens-wt/SLE/2015/Makona-0507_C1_PL4680
sGP Zaire ebolavirus.	ALX33549.1	973434066	364	Sierra Leone	12-Mar-2015	Ebola virus/H.sapiens-wt/SLE/2015/Makona-0507_C1_PL4680
ssGP Zaire ebolavirus.	ALX33525.1	973434038	297	Sierra Leone	01-Jun-2015	Ebola virus/H.sapiens-wt/SLE/2015/Makona-0806_C1_PL7511
sGP Zaire ebolavirus.	ALX33524.1	973434037	364	Sierra Leone	01-Jun-2015	Ebola virus/H.sapiens-wt/SLE/2015/Makona-0806_C1_PL7511
ssGP Zaire ebolavirus.	ALX33517.1	973434029	297	Sierra Leone	23-Jul-2015	Ebola virus/H.sapiens-wt/SLE/2015/Makona-2507_C1_MK8878
sGP Zaire ebolavirus.	ALX33516.1	973434028	364	Sierra Leone	23-Jul-2015	Ebola virus/H.sapiens-wt/SLE/2015/Makona-2507_C1_MK8878
ssGP Zaire ebolavirus.	ALX33497.1	973434006	297	Sierra Leone	28-Dec-2014	Ebola virus/H.sapiens-wt/SLE/2014/Makona-1507_C2_MK0575
sGP Zaire ebolavirus.	ALX33496.1	973434005	364	Sierra Leone	28-Dec-2014	Ebola virus/H.sapiens-wt/SLE/2014/Makona-1507_C2_MK0575
ssGP Zaire ebolavirus.	ALX33483.1	973433990	297	Sierra Leone	12-Feb-2015	Ebola virus/H.sapiens-wt/SLE/2015/Makona-1807_C2_10454_EMLK
sGP Zaire ebolavirus.	ALX33482.1	973433989	364	Sierra Leone	12-Feb-2015	Ebola virus/H.sapiens-wt/SLE/2015/Makona-1807_C2_10454_EMLK
virion spike glycoprotein precursor Zaire ebolavirus.	ALX33481.1	973433988	676	Sierra Leone	12-Feb-2015	Ebola virus/H.sapiens-wt/SLE/2015/Makona-1807_C2_10454_EMLK
ssGP Zaire ebolavirus.	ALX33468.1	973433973	297	Sierra Leone	05-Mar-2015	Ebola virus/H.sapiens-wt/SLE/2015/Makona-0507_C1_PL4322
sGP Zaire ebolavirus.	ALX33467.1	973433972	364	Sierra Leone	05-Mar-2015	Ebola virus/H.sapiens-wt/SLE/2015/Makona-0507_C1_PL4322
ssGP Zaire ebolavirus.	ALX33454.1	973433957	297	Sierra Leone	22-Dec-2014	Ebola virus/H.sapiens-wt/SLE/2014/Makona-1007_C2_MK0391
sGP Zaire ebolavirus.	ALX33453.1	973433956	364	Sierra Leone	22-Dec-2014	Ebola virus/H.sapiens-wt/SLE/2014/Makona-1007_C2_MK0391
ssGP Zaire ebolavirus.	ALX33446.1	973433948	297	Sierra Leone	02-Feb-2015	Ebola virus/H.sapiens-wt/SLE/2015/Makona-2507_C2_10247_EMLK
sGP Zaire ebolavirus.	ALX33445.1	973433947	364	Sierra Leone	02-Feb-2015	Ebola virus/H.sapiens-wt/SLE/2015/Makona-2507_C2_10247_EMLK
ssGP Zaire ebolavirus.	ALX33432.1	973433932	297	Sierra Leone	14-Jan-2015	Ebola virus/H.sapiens-wt/SLE/2015/Makona-2807_C1_75688_EMLH
sGP Zaire ebolavirus.	ALX33431.1	973433931	364	Sierra Leone	14-Jan-2015	Ebola virus/H.sapiens-wt/SLE/2015/Makona-2807_C1_75688_EMLH
ssGP Zaire ebolavirus.	ALX33406.1	973433902	297	Sierra Leone	07-Jun-2015	Ebola virus/H.sapiens-wt/SLE/2015/Makona-1807_C1_15323_EMLK
sGP Zaire ebolavirus.	ALX33405.1	973433901	364	Sierra Leone	07-Jun-2015	Ebola virus/H.sapiens-wt/SLE/2015/Makona-1807_C1_15323_EMLK
ssGP Zaire ebolavirus.	ALX33374.1	973433865	297	Sierra Leone	31-Dec-2014	Ebola virus/H.sapiens-wt/SLE/2014/Makona-1708_C1_MK0704R
sGP Zaire ebolavirus.	ALX33373.1	973433864	364	Sierra Leone	31-Dec-2014	Ebola virus/H.sapiens-wt/SLE/2014/Makona-1708_C1_MK0704R
virion spike glycoprotein precursor Zaire ebolavirus.	ALX33372.1	973433863	676	Sierra Leone	31-Dec-2014	Ebola virus/H.sapiens-wt/SLE/2014/Makona-1708_C1_MK0704R
ssGP Zaire ebolavirus.	ALX33359.1	973433848	297	Sierra Leone	11-Feb-2015	Ebola virus/H.sapiens-wt/SLE/2015/Makona-2607_C1_735_EMLH
sGP Zaire ebolavirus.	ALX33358.1	973433847	364	Sierra Leone	11-Feb-2015	Ebola virus/H.sapiens-wt/SLE/2015/Makona-2607_C1_735_EMLH
ssGP Zaire ebolavirus.	ALX33351.1	973433839	297	Sierra Leone	14-Mar-2015	Ebola virus/H.sapiens-wt/SLE/2015/Makona-0807_C1_PL4784
sGP Zaire ebolavirus.	ALX33350.1	973433838	364	Sierra Leone	14-Mar-2015	Ebola virus/H.sapiens-wt/SLE/2015/Makona-0807_C1_PL4784
ssGP Zaire ebolavirus.	ALX33337.1	973433823	297	Sierra Leone	03-Mar-2015	Ebola virus/H.sapiens-wt/SLE/2015/Makona-0507_C1_PL4248
sGP Zaire ebolavirus.	ALX33336.1	973433822	364	Sierra Leone	03-Mar-2015	Ebola virus/H.sapiens-wt/SLE/2015/Makona-0507_C1_PL4248
ssGP Zaire ebolavirus.	ALX33311.1	973433793	297	Sierra Leone	09-Sep-2015	Ebola virus/H.sapiens-wt/SLE/2015/Makona-1209_C1_20573_EMLK
sGP Zaire ebolavirus.	ALX33310.1	973433792	364	Sierra Leone	09-Sep-2015	Ebola virus/H.sapiens-wt/SLE/2015/Makona-1209_C1_20573_EMLK
ssGP Zaire ebolavirus.	ALX33297.1	973433777	297	Sierra Leone	25-Feb-2015	Ebola virus/H.sapiens-wt/SLE/2015/Makona-2104_C1_MK2367
sGP Zaire ebolavirus.	ALX33296.1	973433776	364	Sierra Leone	25-Feb-2015	Ebola virus/H.sapiens-wt/SLE/2015/Makona-2104_C1_MK2367
ssGP Zaire ebolavirus.	ALX33283.1	973433761	297	Sierra Leone	12-Jul-2015	Ebola virus/H.sapiens-wt/SLE/2015/Makona-2208_C2_18687R_EMLH
sGP Zaire ebolavirus.	ALX33282.1	973433760	364	Sierra Leone	12-Jul-2015	Ebola virus/H.sapiens-wt/SLE/2015/Makona-2208_C2_18687R_EMLH
ssGP Zaire ebolavirus.	ALX33240.1	973433711	297	Sierra Leone	27-Feb-2015	Ebola virus/H.sapiens-wt/SLE/2015/Makona-2607_C2_12229_EMLH
sGP Zaire ebolavirus.	ALX33239.1	973433710	364	Sierra Leone	27-Feb-2015	Ebola virus/H.sapiens-wt/SLE/2015/Makona-2607_C2_12229_EMLH
ssGP Zaire ebolavirus.	ALX33226.1	973433695	297	Sierra Leone	04-Mar-2015	Ebola virus/H.sapiens-wt/SLE/2015/Makona-1007_C1_PL4346
sGP Zaire ebolavirus.	ALX33225.1	973433694	364	Sierra Leone	04-Mar-2015	Ebola virus/H.sapiens-wt/SLE/2015/Makona-1007_C1_PL4346
ssGP Zaire ebolavirus.	ALX33218.1	973433686	297	Sierra Leone	24-Feb-2015	Ebola virus/H.sapiens-wt/SLE/2015/Makona-2104_C1_MK2343
sGP Zaire ebolavirus.	ALX33217.1	973433685	364	Sierra Leone	24-Feb-2015	Ebola virus/H.sapiens-wt/SLE/2015/Makona-2104_C1_MK2343
ssGP Zaire ebolavirus.	ALX33210.1	973433677	297	Sierra Leone	23-Apr-2015	Ebola virus/H.sapiens-wt/SLE/2015/Makona-1807_C2_14782_EMLK
sGP Zaire ebolavirus.	ALX33209.1	973433676	364	Sierra Leone	23-Apr-2015	Ebola virus/H.sapiens-wt/SLE/2015/Makona-1807_C2_14782_EMLK
ssGP Zaire ebolavirus.	ALX33202.1	973433668	297	Sierra Leone	22-Mar-2015	Ebola virus/H.sapiens-wt/SLE/2015/Makona-0507_C1_PL5179
sGP Zaire ebolavirus.	ALX33201.1	973433667	364	Sierra Leone	22-Mar-2015	Ebola virus/H.sapiens-wt/SLE/2015/Makona-0507_C1_PL5179
ssGP Zaire ebolavirus.	ALX33194.1	973433659	297	Sierra Leone	22-Jan-2015	Ebola virus/H.sapiens-wt/SLE/2015/Makona-2507_C2_10066_EMLK
sGP Zaire ebolavirus.	ALX33193.1	973433658	364	Sierra Leone	22-Jan-2015	Ebola virus/H.sapiens-wt/SLE/2015/Makona-2507_C2_10066_EMLK
ssGP Zaire ebolavirus.	ALX33186.1	973433650	297	Sierra Leone	05-Jan-2015	Ebola virus/H.sapiens-wt/SLE/2015/Makona-3007_C2_77612_EMLK
sGP Zaire ebolavirus.	ALX33185.1	973433649	364	Sierra Leone	05-Jan-2015	Ebola virus/H.sapiens-wt/SLE/2015/Makona-3007_C2_77612_EMLK
ssGP Zaire ebolavirus.	ALX33166.1	973433627	297	Sierra Leone	16-Mar-2015	Ebola virus/H.sapiens-wt/SLE/2015/Makona-0807_C1_PL4865
sGP Zaire ebolavirus.	ALX33165.1	973433626	364	Sierra Leone	16-Mar-2015	Ebola virus/H.sapiens-wt/SLE/2015/Makona-0807_C1_PL4865
ssGP Zaire ebolavirus.	ALX33123.1	973433577	297	Sierra Leone	26-Feb-2015	Ebola virus/H.sapiens-wt/SLE/2015/Makona-1105_C1_MK2436
sGP Zaire ebolavirus.	ALX33122.1	973433576	364	Sierra Leone	26-Feb-2015	Ebola virus/H.sapiens-wt/SLE/2015/Makona-1105_C1_MK2436
ssGP Zaire ebolavirus.	ALX33103.1	973433554	297	Sierra Leone	12-Mar-2015	Ebola virus/H.sapiens-wt/SLE/2015/Makona-0507_C1_PL4679
sGP Zaire ebolavirus.	ALX33102.1	973433553	364	Sierra Leone	12-Mar-2015	Ebola virus/H.sapiens-wt/SLE/2015/Makona-0507_C1_PL4679
ssGP Zaire ebolavirus.	ALX33071.1	973433517	297	Sierra Leone	21-Jun-2015	Ebola virus/H.sapiens-wt/SLE/2015/Makona-1807_C1_PL8310b
sGP Zaire ebolavirus.	ALX33070.1	973433516	364	Sierra Leone	21-Jun-2015	Ebola virus/H.sapiens-wt/SLE/2015/Makona-1807_C1_PL8310b
ssGP Zaire ebolavirus.	ALX33063.1	973433508	297	Sierra Leone	29-May-2015	Ebola virus/H.sapiens-wt/SLE/2015/Makona-0806_C1_PL7429
sGP Zaire ebolavirus.	ALX33062.1	973433507	364	Sierra Leone	29-May-2015	Ebola virus/H.sapiens-wt/SLE/2015/Makona-0806_C1_PL7429
virion spike glycoprotein precursor Zaire ebolavirus.	ALX33061.1	973433506	676	Sierra Leone	29-May-2015	Ebola virus/H.sapiens-wt/SLE/2015/Makona-0806_C1_PL7429
ssGP Zaire ebolavirus.	ALX33048.1	973433491	297	Sierra Leone	02-Mar-2015	Ebola virus/H.sapiens-wt/SLE/2015/Makona-0507_C1_PL4226
sGP Zaire ebolavirus.	ALX33047.1	973433490	364	Sierra Leone	02-Mar-2015	Ebola virus/H.sapiens-wt/SLE/2015/Makona-0507_C1_PL4226
ssGP Zaire ebolavirus.	ALX33029.1	973433469	297	Sierra Leone	23-Mar-2015	Ebola virus/H.sapiens-wt/SLE/2015/Makona-0305_C1_PL5201
sGP Zaire ebolavirus.	ALX33028.1	973433468	364	Sierra Leone	23-Mar-2015	Ebola virus/H.sapiens-wt/SLE/2015/Makona-0305_C1_PL5201
ssGP Zaire ebolavirus.	ALX33003.1	973433439	297	Sierra Leone	03-Feb-2015	Ebola virus/H.sapiens-wt/SLE/2015/Makona-0806_C1_KT4677
sGP Zaire ebolavirus.	ALX33002.1	973433438	364	Sierra Leone	03-Feb-2015	Ebola virus/H.sapiens-wt/SLE/2015/Makona-0806_C1_KT4677
ssGP Zaire ebolavirus.	ALX32978.1	973433410	297	Sierra Leone	28-Feb-2015	Ebola virus/H.sapiens-wt/SLE/2015/Makona-2607_C2_12242_EMLH
sGP Zaire ebolavirus.	ALX32977.1	973433409	364	Sierra Leone	28-Feb-2015	Ebola virus/H.sapiens-wt/SLE/2015/Makona-2607_C2_12242_EMLH
ssGP Zaire ebolavirus.	ALX32965.1	973433395	297	Sierra Leone	15-Jan-2015	Ebola virus/H.sapiens-wt/SLE/2015/Makona-2807_C1_75705_EMLH
sGP Zaire ebolavirus.	ALX32964.1	973433394	364	Sierra Leone	15-Jan-2015	Ebola virus/H.sapiens-wt/SLE/2015/Makona-2807_C1_75705_EMLH
ssGP Zaire ebolavirus.	ALX32921.1	973433344	297	Sierra Leone	06-Mar-2015	Ebola virus/H.sapiens-wt/SLE/2015/Makona-3004_C1_KT5734
sGP Zaire ebolavirus.	ALX32920.1	973433343	364	Sierra Leone	06-Mar-2015	Ebola virus/H.sapiens-wt/SLE/2015/Makona-3004_C1_KT5734
ssGP Zaire ebolavirus.	ALX32913.1	973433335	297	Sierra Leone	15-Feb-2015	Ebola virus/H.sapiens-wt/SLE/2015/Makona-1807_C2_14549_EMLK
sGP Zaire ebolavirus.	ALX32912.1	973433334	364	Sierra Leone	15-Feb-2015	Ebola virus/H.sapiens-wt/SLE/2015/Makona-1807_C2_14549_EMLK
ssGP Zaire ebolavirus.	ALX32899.1	973433319	297	Sierra Leone	04-Jun-2015	Ebola virus/H.sapiens-wt/SLE/2015/Makona-1706_C1_PL7604
sGP Zaire ebolavirus.	ALX32898.1	973433318	364	Sierra Leone	04-Jun-2015	Ebola virus/H.sapiens-wt/SLE/2015/Makona-1706_C1_PL7604
ssGP Zaire ebolavirus.	ALX32861.1	973433275	297	Sierra Leone	24-Feb-2015	Ebola virus/H.sapiens-wt/SLE/2015/Makona-2104_C1_MK2344
sGP Zaire ebolavirus.	ALX32860.1	973433274	364	Sierra Leone	24-Feb-2015	Ebola virus/H.sapiens-wt/SLE/2015/Makona-2104_C1_MK2344
ssGP Zaire ebolavirus.	ALX32830.1	973433239	297	Sierra Leone	17-Jan-2015	Ebola virus/H.sapiens-wt/SLE/2015/Makona-2605_C1_MK1202
sGP Zaire ebolavirus.	ALX32829.1	973433238	364	Sierra Leone	17-Jan-2015	Ebola virus/H.sapiens-wt/SLE/2015/Makona-2605_C1_MK1202
virion spike glycoprotein precursor Zaire ebolavirus.	ALX32828.1	973433237	676	Sierra Leone	17-Jan-2015	Ebola virus/H.sapiens-wt/SLE/2015/Makona-2605_C1_MK1202
ssGP Zaire ebolavirus.	ALX32821.1	973433229	297	Sierra Leone	07-Jul-2015	Ebola virus/H.sapiens-wt/SLE/2015/Makona-2208_C2_19560R_EMLK
sGP Zaire ebolavirus.	ALX32820.1	973433228	364	Sierra Leone	07-Jul-2015	Ebola virus/H.sapiens-wt/SLE/2015/Makona-2208_C2_19560R_EMLK
ssGP Zaire ebolavirus.	ALX32813.1	973433220	297	Sierra Leone	05-Jan-2015	Ebola virus/H.sapiens-wt/SLE/2015/Makona-3007_C2_77613_EMLK
sGP Zaire ebolavirus.	ALX32812.1	973433219	364	Sierra Leone	05-Jan-2015	Ebola virus/H.sapiens-wt/SLE/2015/Makona-3007_C2_77613_EMLK
ssGP Zaire ebolavirus.	ALX32789.1	973433192	297	Sierra Leone	16-Apr-2015	Ebola virus/H.sapiens-wt/SLE/2015/Makona-2104_C2_MK4165
sGP Zaire ebolavirus.	ALX32788.1	973433191	364	Sierra Leone	16-Apr-2015	Ebola virus/H.sapiens-wt/SLE/2015/Makona-2104_C2_MK4165
ssGP Zaire ebolavirus.	ALX32746.1	973433142	297	Sierra Leone	02-Feb-2015	Ebola virus/H.sapiens-wt/SLE/2015/Makona-2507_C2_10244_EMLK
sGP Zaire ebolavirus.	ALX32745.1	973433141	364	Sierra Leone	02-Feb-2015	Ebola virus/H.sapiens-wt/SLE/2015/Makona-2507_C2_10244_EMLK
ssGP Zaire ebolavirus.	ALX32738.1	973433133	297	Sierra Leone	01-Mar-2015	Ebola virus/H.sapiens-wt/SLE/2015/Makona-1007_C1_PL4187
sGP Zaire ebolavirus.	ALX32737.1	973433132	364	Sierra Leone	01-Mar-2015	Ebola virus/H.sapiens-wt/SLE/2015/Makona-1007_C1_PL4187
ssGP Zaire ebolavirus.	ALX32713.1	973433104	297	Sierra Leone	10-Jan-2015	Ebola virus/H.sapiens-wt/SLE/2015/Makona-2507_C2_77723_EMLK
sGP Zaire ebolavirus.	ALX32712.1	973433103	364	Sierra Leone	10-Jan-2015	Ebola virus/H.sapiens-wt/SLE/2015/Makona-2507_C2_77723_EMLK
ssGP Zaire ebolavirus.	ALX32705.1	973433095	297	Sierra Leone	25-Feb-2015	Ebola virus/H.sapiens-wt/SLE/2015/Makona-1105_C1_MK2431
sGP Zaire ebolavirus.	ALX32704.1	973433094	364	Sierra Leone	25-Feb-2015	Ebola virus/H.sapiens-wt/SLE/2015/Makona-1105_C1_MK2431
ssGP Zaire ebolavirus.	ALX32650.1	973433031	297	Sierra Leone	16-Feb-2015	Ebola virus/H.sapiens-wt/SLE/2015/Makona-0806_C1_KT5073
sGP Zaire ebolavirus.	ALX32649.1	973433030	364	Sierra Leone	16-Feb-2015	Ebola virus/H.sapiens-wt/SLE/2015/Makona-0806_C1_KT5073
ssGP Zaire ebolavirus.	ALX32642.1	973433022	297	Sierra Leone	26-Feb-2015	Ebola virus/H.sapiens-wt/SLE/2015/Makona-1007_C1_PL4028
sGP Zaire ebolavirus.	ALX32641.1	973433021	364	Sierra Leone	26-Feb-2015	Ebola virus/H.sapiens-wt/SLE/2015/Makona-1007_C1_PL4028
ssGP Zaire ebolavirus.	ALX32628.1	973433006	297	Sierra Leone	06-Apr-2015	Ebola virus/H.sapiens-wt/SLE/2015/Makona-0205_C2_PL5868
sGP Zaire ebolavirus.	ALX32627.1	973433005	364	Sierra Leone	06-Apr-2015	Ebola virus/H.sapiens-wt/SLE/2015/Makona-0205_C2_PL5868
ssGP Zaire ebolavirus.	ALX32620.1	973432997	297	Sierra Leone	04-Feb-2015	Ebola virus/H.sapiens-wt/SLE/2015/Makona-0806_C1_KT4695
sGP Zaire ebolavirus.	ALX32619.1	973432996	364	Sierra Leone	04-Feb-2015	Ebola virus/H.sapiens-wt/SLE/2015/Makona-0806_C1_KT4695
virion spike glycoprotein precursor Zaire ebolavirus.	ALX32618.1	973432995	676	Sierra Leone	04-Feb-2015	Ebola virus/H.sapiens-wt/SLE/2015/Makona-0806_C1_KT4695
ssGP Zaire ebolavirus.	ALX32605.1	973432980	297	Sierra Leone	18-Mar-2015	Ebola virus/H.sapiens-wt/SLE/2015/Makona-0305_C1_PL4932
sGP Zaire ebolavirus.	ALX32604.1	973432979	364	Sierra Leone	18-Mar-2015	Ebola virus/H.sapiens-wt/SLE/2015/Makona-0305_C1_PL4932
virion spike glycoprotein precursor Zaire ebolavirus.	ALX32603.1	973432978	676	Sierra Leone	18-Mar-2015	Ebola virus/H.sapiens-wt/SLE/2015/Makona-0305_C1_PL4932
ssGP Zaire ebolavirus.	ALX32572.1	973432942	297	Sierra Leone	25-Feb-2015	Ebola virus/H.sapiens-wt/SLE/2015/Makona-1105_C1_MK2405
sGP Zaire ebolavirus.	ALX32571.1	973432941	364	Sierra Leone	25-Feb-2015	Ebola virus/H.sapiens-wt/SLE/2015/Makona-1105_C1_MK2405
ssGP Zaire ebolavirus.	ALX32564.1	973432933	297	Sierra Leone	18-Apr-2015	Ebola virus/H.sapiens-wt/SLE/2015/Makona-1807_C2_14723_EMLK
sGP Zaire ebolavirus.	ALX32563.1	973432932	364	Sierra Leone	18-Apr-2015	Ebola virus/H.sapiens-wt/SLE/2015/Makona-1807_C2_14723_EMLK
ssGP Zaire ebolavirus.	ALX32550.1	973432917	297	Sierra Leone	26-Jan-2015	Ebola virus/H.sapiens-wt/SLE/2015/Makona-3007_C1_443_EMLH
sGP Zaire ebolavirus.	ALX32549.1	973432916	364	Sierra Leone	26-Jan-2015	Ebola virus/H.sapiens-wt/SLE/2015/Makona-3007_C1_443_EMLH
ssGP Zaire ebolavirus.	ALX32537.1	973432902	297	Sierra Leone	05-Jan-2015	Ebola virus/H.sapiens-wt/SLE/2015/Makona-1507_C2_MK0868
sGP Zaire ebolavirus.	ALX32536.1	973432901	364	Sierra Leone	05-Jan-2015	Ebola virus/H.sapiens-wt/SLE/2015/Makona-1507_C2_MK0868
ssGP Zaire ebolavirus.	ALX32524.1	973432887	297	Sierra Leone	23-Mar-2015	Ebola virus/H.sapiens-wt/SLE/2015/Makona-0305_C1_PL5228
sGP Zaire ebolavirus.	ALX32523.1	973432886	364	Sierra Leone	23-Mar-2015	Ebola virus/H.sapiens-wt/SLE/2015/Makona-0305_C1_PL5228
ssGP Zaire ebolavirus.	ALX32516.1	973432878	297	Sierra Leone	05-Jan-2015	Ebola virus/H.sapiens-wt/SLE/2015/Makona-1507_C2_MK0869
sGP Zaire ebolavirus.	ALX32515.1	973432877	364	Sierra Leone	05-Jan-2015	Ebola virus/H.sapiens-wt/SLE/2015/Makona-1507_C2_MK0869
ssGP Zaire ebolavirus.	ALX32485.1	973432842	297	Sierra Leone	28-Feb-2015	Ebola virus/H.sapiens-wt/SLE/2015/Makona-2208_C1_PL4127R
sGP Zaire ebolavirus.	ALX32484.1	973432841	364	Sierra Leone	28-Feb-2015	Ebola virus/H.sapiens-wt/SLE/2015/Makona-2208_C1_PL4127R
ssGP Zaire ebolavirus.	ALX32477.1	973432833	297	Sierra Leone	11-Jan-2015	Ebola virus/H.sapiens-wt/SLE/2015/Makona-0806_C1_MK1040
sGP Zaire ebolavirus.	ALX32476.1	973432832	364	Sierra Leone	11-Jan-2015	Ebola virus/H.sapiens-wt/SLE/2015/Makona-0806_C1_MK1040
virion spike glycoprotein precursor Zaire ebolavirus.	ALX32475.1	973432831	676	Sierra Leone	11-Jan-2015	Ebola virus/H.sapiens-wt/SLE/2015/Makona-0806_C1_MK1040
ssGP Zaire ebolavirus.	ALX32468.1	973432823	297	Sierra Leone	16-Mar-2015	Ebola virus/H.sapiens-wt/SLE/2015/Makona-0305_C1_PL4844
sGP Zaire ebolavirus.	ALX32467.1	973432822	364	Sierra Leone	16-Mar-2015	Ebola virus/H.sapiens-wt/SLE/2015/Makona-0305_C1_PL4844
virion spike glycoprotein precursor Zaire ebolavirus.	ALX32466.1	973432821	676	Sierra Leone	16-Mar-2015	Ebola virus/H.sapiens-wt/SLE/2015/Makona-0305_C1_PL4844
ssGP Zaire ebolavirus.	ALX32460.1	973432814	297	Sierra Leone	12-Feb-2015	Ebola virus/H.sapiens-wt/SLE/2015/Makona-1708_C2_MK2008R2
sGP Zaire ebolavirus.	ALX32459.1	973432813	364	Sierra Leone	12-Feb-2015	Ebola virus/H.sapiens-wt/SLE/2015/Makona-1708_C2_MK2008R2
ssGP Zaire ebolavirus.	ALX32446.1	973432798	297	Sierra Leone	29-Jan-2015	Ebola virus/H.sapiens-wt/SLE/2015/Makona-2807_C1_473_EMLH
sGP Zaire ebolavirus.	ALX32445.1	973432797	364	Sierra Leone	29-Jan-2015	Ebola virus/H.sapiens-wt/SLE/2015/Makona-2807_C1_473_EMLH
ssGP Zaire ebolavirus.	ALX32439.1	973432790	297	Sierra Leone	01-May-2015	Ebola virus/H.sapiens-wt/SLE/2015/Makona-2005_C2_PL6656
sGP Zaire ebolavirus.	ALX32438.1	973432789	364	Sierra Leone	01-May-2015	Ebola virus/H.sapiens-wt/SLE/2015/Makona-2005_C2_PL6656
ssGP Zaire ebolavirus.	ALX32413.1	973432760	297	Sierra Leone	13-Feb-2015	Ebola virus/H.sapiens-wt/SLE/2015/Makona-0208_C2_KT5022R
sGP Zaire ebolavirus.	ALX32412.1	973432759	364	Sierra Leone	13-Feb-2015	Ebola virus/H.sapiens-wt/SLE/2015/Makona-0208_C2_KT5022R
ssGP Zaire ebolavirus.	ALX32406.1	973432752	297	Sierra Leone	21-Apr-2015	Ebola virus/H.sapiens-wt/SLE/2015/Makona-1807_C2_14763_EMLK
sGP Zaire ebolavirus.	ALX32405.1	973432751	364	Sierra Leone	21-Apr-2015	Ebola virus/H.sapiens-wt/SLE/2015/Makona-1807_C2_14763_EMLK
ssGP Zaire ebolavirus.	ALX32374.1	973432715	297	Sierra Leone	13-Mar-2015	Ebola virus/H.sapiens-wt/SLE/2015/Makona-0305_C1_PL4696
sGP Zaire ebolavirus.	ALX32373.1	973432714	364	Sierra Leone	13-Mar-2015	Ebola virus/H.sapiens-wt/SLE/2015/Makona-0305_C1_PL4696
ssGP Zaire ebolavirus.	ALX32361.1	973432700	297	Sierra Leone	23-Feb-2015	Ebola virus/H.sapiens-wt/SLE/2015/Makona-2607_C2_12192_EMLH
sGP Zaire ebolavirus.	ALX32360.1	973432699	364	Sierra Leone	23-Feb-2015	Ebola virus/H.sapiens-wt/SLE/2015/Makona-2607_C2_12192_EMLH
ssGP Zaire ebolavirus.	ALX32353.1	973432691	297	Sierra Leone	23-Dec-2014	Ebola virus/H.sapiens-wt/SLE/2014/Makona-1708_C1_MK0491R
sGP Zaire ebolavirus.	ALX32352.1	973432690	364	Sierra Leone	23-Dec-2014	Ebola virus/H.sapiens-wt/SLE/2014/Makona-1708_C1_MK0491R
ssGP Zaire ebolavirus.	ALX32311.1	973432642	297	Sierra Leone	14-Mar-2015	Ebola virus/H.sapiens-wt/SLE/2015/Makona-0807_C1_PL4763
sGP Zaire ebolavirus.	ALX32310.1	973432641	364	Sierra Leone	14-Mar-2015	Ebola virus/H.sapiens-wt/SLE/2015/Makona-0807_C1_PL4763
ssGP Zaire ebolavirus.	ALX32254.1	973432575	297	Sierra Leone	10-Mar-2015	Ebola virus/H.sapiens-wt/SLE/2015/Makona-3004_C1_KT5832
sGP Zaire ebolavirus.	ALX32253.1	973432574	364	Sierra Leone	10-Mar-2015	Ebola virus/H.sapiens-wt/SLE/2015/Makona-3004_C1_KT5832
ssGP Zaire ebolavirus.	ALX32204.1	973432517	297	Sierra Leone	26-Feb-2015	Ebola virus/H.sapiens-wt/SLE/2015/Makona-1007_C1_PL4059
sGP Zaire ebolavirus.	ALX32203.1	973432516	364	Sierra Leone	26-Feb-2015	Ebola virus/H.sapiens-wt/SLE/2015/Makona-1007_C1_PL4059
ssGP Zaire ebolavirus.	ALX32197.1	973432509	297	Sierra Leone	15-May-2015	Ebola virus/H.sapiens-wt/SLE/2015/Makona-2005_C2_PL7055
sGP Zaire ebolavirus.	ALX32196.1	973432508	364	Sierra Leone	15-May-2015	Ebola virus/H.sapiens-wt/SLE/2015/Makona-2005_C2_PL7055
ssGP Zaire ebolavirus.	ALX32166.1	973432473	297	Sierra Leone	10-Jan-2015	Ebola virus/H.sapiens-wt/SLE/2015/Makona-2507_C2_77722_EMLK
sGP Zaire ebolavirus.	ALX32165.1	973432472	364	Sierra Leone	10-Jan-2015	Ebola virus/H.sapiens-wt/SLE/2015/Makona-2507_C2_77722_EMLK
ssGP Zaire ebolavirus.	ALX32159.1	973432465	297	Sierra Leone	28-Feb-2015	Ebola virus/H.sapiens-wt/SLE/2015/Makona-0807_C1_PL4126
sGP Zaire ebolavirus.	ALX32158.1	973432464	364	Sierra Leone	28-Feb-2015	Ebola virus/H.sapiens-wt/SLE/2015/Makona-0807_C1_PL4126
ssGP Zaire ebolavirus.	ALX32145.1	973432449	297	Sierra Leone	27-Feb-2015	Ebola virus/H.sapiens-wt/SLE/2015/Makona-1007_C1_PL4094
sGP Zaire ebolavirus.	ALX32144.1	973432448	364	Sierra Leone	27-Feb-2015	Ebola virus/H.sapiens-wt/SLE/2015/Makona-1007_C1_PL4094
ssGP Zaire ebolavirus.	ALX32137.1	973432440	297	Sierra Leone	16-Mar-2015	Ebola virus/H.sapiens-wt/SLE/2015/Makona-3004_C1_KT5974
sGP Zaire ebolavirus.	ALX32136.1	973432439	364	Sierra Leone	16-Mar-2015	Ebola virus/H.sapiens-wt/SLE/2015/Makona-3004_C1_KT5974
ssGP Zaire ebolavirus.	ALX32124.1	973432425	297	Sierra Leone	10-Feb-2015	Ebola virus/H.sapiens-wt/SLE/2015/Makona-1807_C2_10398_EMLK
sGP Zaire ebolavirus.	ALX32123.1	973432424	364	Sierra Leone	10-Feb-2015	Ebola virus/H.sapiens-wt/SLE/2015/Makona-1807_C2_10398_EMLK
ssGP Zaire ebolavirus.	ALX32116.1	973432416	297	Sierra Leone	24-Jan-2015	Ebola virus/H.sapiens-wt/SLE/2015/Makona-2807_C1_413_EMLH
sGP Zaire ebolavirus.	ALX32115.1	973432415	364	Sierra Leone	24-Jan-2015	Ebola virus/H.sapiens-wt/SLE/2015/Makona-2807_C1_413_EMLH
ssGP Zaire ebolavirus.	ALX32108.1	973432407	297	Sierra Leone	28-Feb-2015	Ebola virus/H.sapiens-wt/SLE/2015/Makona-0807_C1_PL4125
sGP Zaire ebolavirus.	ALX32107.1	973432406	364	Sierra Leone	28-Feb-2015	Ebola virus/H.sapiens-wt/SLE/2015/Makona-0807_C1_PL4125
ssGP Zaire ebolavirus.	ALX32094.1	973432391	297	Sierra Leone	26-Feb-2015	Ebola virus/H.sapiens-wt/SLE/2015/Makona-2104_C1_MK2437
sGP Zaire ebolavirus.	ALX32093.1	973432390	364	Sierra Leone	26-Feb-2015	Ebola virus/H.sapiens-wt/SLE/2015/Makona-2104_C1_MK2437
ssGP Zaire ebolavirus.	ALX32081.1	973432376	297	Sierra Leone	11-Feb-2015	Ebola virus/H.sapiens-wt/SLE/2015/Makona-0208_C2_KT4935R
sGP Zaire ebolavirus.	ALX32080.1	973432375	364	Sierra Leone	11-Feb-2015	Ebola virus/H.sapiens-wt/SLE/2015/Makona-0208_C2_KT4935R
ssGP Zaire ebolavirus.	ALX32073.1	973432367	297	Sierra Leone	26-Feb-2015	Ebola virus/H.sapiens-wt/SLE/2015/Makona-2104_C1_MK2449
sGP Zaire ebolavirus.	ALX32072.1	973432366	364	Sierra Leone	26-Feb-2015	Ebola virus/H.sapiens-wt/SLE/2015/Makona-2104_C1_MK2449
ssGP Zaire ebolavirus.	ALX32054.1	973432345	297	Sierra Leone	10-Mar-2015	Ebola virus/H.sapiens-wt/SLE/2015/Makona-3004_C1_KT5859
sGP Zaire ebolavirus.	ALX32053.1	973432344	364	Sierra Leone	10-Mar-2015	Ebola virus/H.sapiens-wt/SLE/2015/Makona-3004_C1_KT5859
ssGP Zaire ebolavirus.	ALX32036.1	973432324	297	Sierra Leone	08-Jul-2015	Ebola virus/H.sapiens-wt/SLE/2015/Makona-1507_C1_18636_EMLH
sGP Zaire ebolavirus.	ALX32035.1	973432323	364	Sierra Leone	08-Jul-2015	Ebola virus/H.sapiens-wt/SLE/2015/Makona-1507_C1_18636_EMLH
ssGP Zaire ebolavirus.	ALX32028.1	973432315	297	Sierra Leone	20-Apr-2015	Ebola virus/H.sapiens-wt/SLE/2015/Makona-0807_C1_14750_EMLK
sGP Zaire ebolavirus.	ALX32027.1	973432314	364	Sierra Leone	20-Apr-2015	Ebola virus/H.sapiens-wt/SLE/2015/Makona-0807_C1_14750_EMLK
ssGP Zaire ebolavirus.	ALX32011.1	973432295	297	Sierra Leone	10-Jul-2015	Ebola virus/H.sapiens-wt/SLE/2015/Makona-1507_C1_18649_EMLH
sGP Zaire ebolavirus.	ALX32010.1	973432294	364	Sierra Leone	10-Jul-2015	Ebola virus/H.sapiens-wt/SLE/2015/Makona-1507_C1_18649_EMLH
virion spike glycoprotein precursor Zaire ebolavirus.	ALX32009.1	973432293	676	Sierra Leone	10-Jul-2015	Ebola virus/H.sapiens-wt/SLE/2015/Makona-1507_C1_18649_EMLH
ssGP Zaire ebolavirus.	ALX32003.1	973432286	297	Sierra Leone	07-Sep-2015	Ebola virus/H.sapiens-wt/SLE/2015/Makona-1009_C1_20547_EMLK
sGP Zaire ebolavirus.	ALX32002.1	973432285	364	Sierra Leone	07-Sep-2015	Ebola virus/H.sapiens-wt/SLE/2015/Makona-1009_C1_20547_EMLK
ssGP Zaire ebolavirus.	ALX31995.1	973432277	297	Sierra Leone	12-Sep-2015	Ebola virus/H.sapiens-wt/SLE/2015/Makona-1309_C2_MK13013
sGP Zaire ebolavirus.	ALX31994.1	973432276	364	Sierra Leone	12-Sep-2015	Ebola virus/H.sapiens-wt/SLE/2015/Makona-1309_C2_MK13013
ssGP Zaire ebolavirus.	ALX31981.1	973432261	297	Sierra Leone	07-Mar-2015	Ebola virus/H.sapiens-wt/SLE/2015/Makona-1105_C1_MK2790
sGP Zaire ebolavirus.	ALX31980.1	973432260	364	Sierra Leone	07-Mar-2015	Ebola virus/H.sapiens-wt/SLE/2015/Makona-1105_C1_MK2790
ssGP Zaire ebolavirus.	ALX31943.1	973432217	297	Sierra Leone	25-Jun-2015	Ebola virus/H.sapiens-wt/SLE/2015/Makona-0807_C1_PL8486
sGP Zaire ebolavirus.	ALX31942.1	973432216	364	Sierra Leone	25-Jun-2015	Ebola virus/H.sapiens-wt/SLE/2015/Makona-0807_C1_PL8486
ssGP Zaire ebolavirus.	ALX31923.1	973432194	297	Sierra Leone	21-Feb-2015	Ebola virus/H.sapiens-wt/SLE/2015/Makona-1807_C2_14687_EMLK
sGP Zaire ebolavirus.	ALX31922.1	973432193	364	Sierra Leone	21-Feb-2015	Ebola virus/H.sapiens-wt/SLE/2015/Makona-1807_C2_14687_EMLK
ssGP Zaire ebolavirus.	ALX31903.1	973432171	297	Sierra Leone	24-Jun-2015	Ebola virus/H.sapiens-wt/SLE/2015/Makona-0807_C1_PL8429
sGP Zaire ebolavirus.	ALX31902.1	973432170	364	Sierra Leone	24-Jun-2015	Ebola virus/H.sapiens-wt/SLE/2015/Makona-0807_C1_PL8429
ssGP Zaire ebolavirus.	ALX31883.1	973432148	297	Sierra Leone	16-Mar-2015	Ebola virus/H.sapiens-wt/SLE/2015/Makona-0807_C1_PL4864
sGP Zaire ebolavirus.	ALX31882.1	973432147	364	Sierra Leone	16-Mar-2015	Ebola virus/H.sapiens-wt/SLE/2015/Makona-0807_C1_PL4864
ssGP Zaire ebolavirus.	ALX31827.1	973432083	297	Sierra Leone	18-Jun-2015	Ebola virus/H.sapiens-wt/SLE/2015/Makona-2906_C1_PL8172
sGP Zaire ebolavirus.	ALX31826.1	973432082	364	Sierra Leone	18-Jun-2015	Ebola virus/H.sapiens-wt/SLE/2015/Makona-2906_C1_PL8172
virion spike glycoprotein precursor Zaire ebolavirus.	ALX31825.1	973432081	676	Sierra Leone	18-Jun-2015	Ebola virus/H.sapiens-wt/SLE/2015/Makona-2906_C1_PL8172
ssGP Zaire ebolavirus.	ALX31795.1	973432046	297	Sierra Leone	03-May-2015	Ebola virus/H.sapiens-wt/SLE/2015/Makona-1807_C1_14888_EMLK
sGP Zaire ebolavirus.	ALX31794.1	973432045	364	Sierra Leone	03-May-2015	Ebola virus/H.sapiens-wt/SLE/2015/Makona-1807_C1_14888_EMLK
ssGP Zaire ebolavirus.	ALX31763.1	973432009	297	Sierra Leone	07-Mar-2015	Ebola virus/H.sapiens-wt/SLE/2015/Makona-0507_C1_PL4443
sGP Zaire ebolavirus.	ALX31762.1	973432008	364	Sierra Leone	07-Mar-2015	Ebola virus/H.sapiens-wt/SLE/2015/Makona-0507_C1_PL4443
ssGP Zaire ebolavirus.	ALX31749.1	973431993	297	Sierra Leone	07-Feb-2015	Ebola virus/H.sapiens-wt/SLE/2015/Makona-0806_C1_KT4730
sGP Zaire ebolavirus.	ALX31748.1	973431992	364	Sierra Leone	07-Feb-2015	Ebola virus/H.sapiens-wt/SLE/2015/Makona-0806_C1_KT4730
ssGP Zaire ebolavirus.	ALX31741.1	973431984	297	Sierra Leone	26-Mar-2015	Ebola virus/H.sapiens-wt/SLE/2015/Makona-0205_C1_PL5361
sGP Zaire ebolavirus.	ALX31740.1	973431983	364	Sierra Leone	26-Mar-2015	Ebola virus/H.sapiens-wt/SLE/2015/Makona-0205_C1_PL5361
ssGP Zaire ebolavirus.	ALX31733.1	973431975	297	Sierra Leone	08-Jun-2015	Ebola virus/H.sapiens-wt/SLE/2015/Makona-1807_C1_15338_EMLK
sGP Zaire ebolavirus.	ALX31732.1	973431974	364	Sierra Leone	08-Jun-2015	Ebola virus/H.sapiens-wt/SLE/2015/Makona-1807_C1_15338_EMLK
ssGP Zaire ebolavirus.	ALX31719.1	973431959	297	Sierra Leone	20-Mar-2015	Ebola virus/H.sapiens-wt/SLE/2015/Makona-0305_C1_PL5025
sGP Zaire ebolavirus.	ALX31718.1	973431958	364	Sierra Leone	20-Mar-2015	Ebola virus/H.sapiens-wt/SLE/2015/Makona-0305_C1_PL5025
ssGP Zaire ebolavirus.	ALX31671.1	973431903	297	Sierra Leone	03-Jul-2015	Ebola virus/H.sapiens-wt/SLE/2015/Makona-1807_C1_PL8780b
sGP Zaire ebolavirus.	ALX31670.1	973431902	364	Sierra Leone	03-Jul-2015	Ebola virus/H.sapiens-wt/SLE/2015/Makona-1807_C1_PL8780b
ssGP Zaire ebolavirus.	ALX31651.1	973431880	297	Sierra Leone	13-Jul-2015	Ebola virus/H.sapiens-wt/SLE/2015/Makona-1807_C1_PL9192c
sGP Zaire ebolavirus.	ALX31650.1	973431879	364	Sierra Leone	13-Jul-2015	Ebola virus/H.sapiens-wt/SLE/2015/Makona-1807_C1_PL9192c
ssGP Zaire ebolavirus.	ALX31620.1	973431844	297	Sierra Leone	23-Mar-2015	Ebola virus/H.sapiens-wt/SLE/2015/Makona-0305_C1_PL5202
sGP Zaire ebolavirus.	ALX31619.1	973431843	364	Sierra Leone	23-Mar-2015	Ebola virus/H.sapiens-wt/SLE/2015/Makona-0305_C1_PL5202
ssGP Zaire ebolavirus.	ALX31607.1	973431829	297	Sierra Leone	06-Mar-2015	Ebola virus/H.sapiens-wt/SLE/2015/Makona-3004_C1_KT5738
sGP Zaire ebolavirus.	ALX31606.1	973431828	364	Sierra Leone	06-Mar-2015	Ebola virus/H.sapiens-wt/SLE/2015/Makona-3004_C1_KT5738
ssGP Zaire ebolavirus.	ALX31599.1	973431820	297	Sierra Leone	12-Mar-2015	Ebola virus/H.sapiens-wt/SLE/2015/Makona-2104_C2_MK2983
sGP Zaire ebolavirus.	ALX31598.1	973431819	364	Sierra Leone	12-Mar-2015	Ebola virus/H.sapiens-wt/SLE/2015/Makona-2104_C2_MK2983
ssGP Zaire ebolavirus.	ALX31591.1	973431811	297	Sierra Leone	18-Apr-2015	Ebola virus/H.sapiens-wt/SLE/2015/Makona-0807_C1_14729_EMLK
sGP Zaire ebolavirus.	ALX31590.1	973431810	364	Sierra Leone	18-Apr-2015	Ebola virus/H.sapiens-wt/SLE/2015/Makona-0807_C1_14729_EMLK
ssGP Zaire ebolavirus.	ALX31577.1	973431795	297	Sierra Leone	16-Mar-2015	Ebola virus/H.sapiens-wt/SLE/2015/Makona-0807_C1_PL4866
sGP Zaire ebolavirus.	ALX31576.1	973431794	364	Sierra Leone	16-Mar-2015	Ebola virus/H.sapiens-wt/SLE/2015/Makona-0807_C1_PL4866
ssGP Zaire ebolavirus.	ALX31563.1	973431779	297	Sierra Leone	12-Feb-2015	Ebola virus/H.sapiens-wt/SLE/2015/Makona-1807_C2_10455_EMLK
sGP Zaire ebolavirus.	ALX31562.1	973431778	364	Sierra Leone	12-Feb-2015	Ebola virus/H.sapiens-wt/SLE/2015/Makona-1807_C2_10455_EMLK
ssGP Zaire ebolavirus.	ALX31543.1	973431756	297	Sierra Leone	03-Jun-2015	Ebola virus/H.sapiens-wt/SLE/2015/Makona-0807_C1_PL7577
sGP Zaire ebolavirus.	ALX31542.1	973431755	364	Sierra Leone	03-Jun-2015	Ebola virus/H.sapiens-wt/SLE/2015/Makona-0807_C1_PL7577
ssGP Zaire ebolavirus.	ALX31535.1	973431747	297	Sierra Leone	10-Jan-2015	Ebola virus/H.sapiens-wt/SLE/2015/Makona-1007_C2_MK1000
sGP Zaire ebolavirus.	ALX31534.1	973431746	364	Sierra Leone	10-Jan-2015	Ebola virus/H.sapiens-wt/SLE/2015/Makona-1007_C2_MK1000
ssGP Zaire ebolavirus.	ALX31521.1	973431731	297	Sierra Leone	20-Jan-2015	Ebola virus/H.sapiens-wt/SLE/2015/Makona-2807_C1_75789_EMLH
sGP Zaire ebolavirus.	ALX31520.1	973431730	364	Sierra Leone	20-Jan-2015	Ebola virus/H.sapiens-wt/SLE/2015/Makona-2807_C1_75789_EMLH
ssGP Zaire ebolavirus.	ALX31454.1	973431653	297	Sierra Leone	13-Jul-2015	Ebola virus/H.sapiens-wt/SLE/2015/Makona-1807_C1_PL9199Rb
sGP Zaire ebolavirus.	ALX31453.1	973431652	364	Sierra Leone	13-Jul-2015	Ebola virus/H.sapiens-wt/SLE/2015/Makona-1807_C1_PL9199Rb
ssGP Zaire ebolavirus.	ALX31446.1	973431644	297	Sierra Leone	10-Jul-2015	Ebola virus/H.sapiens-wt/SLE/2015/Makona-1507_C1_18650_EMLH
sGP Zaire ebolavirus.	ALX31445.1	973431643	364	Sierra Leone	10-Jul-2015	Ebola virus/H.sapiens-wt/SLE/2015/Makona-1507_C1_18650_EMLH
virion spike glycoprotein precursor Zaire ebolavirus.	ALX31444.1	973431642	676	Sierra Leone	10-Jul-2015	Ebola virus/H.sapiens-wt/SLE/2015/Makona-1507_C1_18650_EMLH
ssGP Zaire ebolavirus.	ALX31415.1	973431608	297	Sierra Leone	14-Jan-2015	Ebola virus/H.sapiens-wt/SLE/2015/Makona-2807_C1_75685_EMLH
sGP Zaire ebolavirus.	ALX31414.1	973431607	364	Sierra Leone	14-Jan-2015	Ebola virus/H.sapiens-wt/SLE/2015/Makona-2807_C1_75685_EMLH
ssGP Zaire ebolavirus.	ALX31401.1	973431592	297	Sierra Leone	25-Feb-2015	Ebola virus/H.sapiens-wt/SLE/2015/Makona-2104_C1_MK2365
sGP Zaire ebolavirus.	ALX31400.1	973431591	364	Sierra Leone	25-Feb-2015	Ebola virus/H.sapiens-wt/SLE/2015/Makona-2104_C1_MK2365
ssGP Zaire ebolavirus.	ALX31382.1	973431570	297	Sierra Leone	27-Feb-2015	Ebola virus/H.sapiens-wt/SLE/2015/Makona-1708_C2_MK2506R
sGP Zaire ebolavirus.	ALX31381.1	973431569	364	Sierra Leone	27-Feb-2015	Ebola virus/H.sapiens-wt/SLE/2015/Makona-1708_C2_MK2506R
ssGP Zaire ebolavirus.	ALX31326.1	973431505	297	Sierra Leone	01-Mar-2015	Ebola virus/H.sapiens-wt/SLE/2015/Makona-1007_C1_PL4190
sGP Zaire ebolavirus.	ALX31325.1	973431504	364	Sierra Leone	01-Mar-2015	Ebola virus/H.sapiens-wt/SLE/2015/Makona-1007_C1_PL4190
ssGP Zaire ebolavirus.	ALX31312.1	973431489	297	Sierra Leone	03-Mar-2015	Ebola virus/H.sapiens-wt/SLE/2015/Makona-0507_C1_PL4249
sGP Zaire ebolavirus.	ALX31311.1	973431488	364	Sierra Leone	03-Mar-2015	Ebola virus/H.sapiens-wt/SLE/2015/Makona-0507_C1_PL4249
ssGP Zaire ebolavirus.	ALX31298.1	973431473	297	Sierra Leone	24-Feb-2015	Ebola virus/H.sapiens-wt/SLE/2015/Makona-2104_C1_MK2342
sGP Zaire ebolavirus.	ALX31297.1	973431472	364	Sierra Leone	24-Feb-2015	Ebola virus/H.sapiens-wt/SLE/2015/Makona-2104_C1_MK2342
ssGP Zaire ebolavirus.	ALX31290.1	973431464	297	Sierra Leone	01-Mar-2015	Ebola virus/H.sapiens-wt/SLE/2015/Makona-1804_C1_MK2570
sGP Zaire ebolavirus.	ALX31289.1	973431463	364	Sierra Leone	01-Mar-2015	Ebola virus/H.sapiens-wt/SLE/2015/Makona-1804_C1_MK2570
ssGP Zaire ebolavirus.	ALX31282.1	973431455	297	Sierra Leone	27-Apr-2015	Ebola virus/H.sapiens-wt/SLE/2015/Makona-1807_C2_14830_EMLK
sGP Zaire ebolavirus.	ALX31281.1	973431454	364	Sierra Leone	27-Apr-2015	Ebola virus/H.sapiens-wt/SLE/2015/Makona-1807_C2_14830_EMLK
ssGP Zaire ebolavirus.	ALX31274.1	973431446	297	Sierra Leone	15-Jan-2015	Ebola virus/H.sapiens-wt/SLE/2015/Makona-2807_C1_75707_EMLH
sGP Zaire ebolavirus.	ALX31273.1	973431445	364	Sierra Leone	15-Jan-2015	Ebola virus/H.sapiens-wt/SLE/2015/Makona-2807_C1_75707_EMLH
ssGP Zaire ebolavirus.	ALX31230.1	973431395	297	Sierra Leone	04-Jun-2015	Ebola virus/H.sapiens-wt/SLE/2015/Makona-1807_C1_15274_EMLK
sGP Zaire ebolavirus.	ALX31229.1	973431394	364	Sierra Leone	04-Jun-2015	Ebola virus/H.sapiens-wt/SLE/2015/Makona-1807_C1_15274_EMLK
ssGP Zaire ebolavirus.	ALX31192.1	973431351	297	Sierra Leone	16-Jan-2015	Ebola virus/H.sapiens-wt/SLE/2015/Makona-2807_C1_75728_EMLH
sGP Zaire ebolavirus.	ALX31191.1	973431350	364	Sierra Leone	16-Jan-2015	Ebola virus/H.sapiens-wt/SLE/2015/Makona-2807_C1_75728_EMLH
ssGP Zaire ebolavirus.	ALX31184.1	973431342	297	Sierra Leone	25-Feb-2015	Ebola virus/H.sapiens-wt/SLE/2015/Makona-0807_C1_PL3984
sGP Zaire ebolavirus.	ALX31183.1	973431341	364	Sierra Leone	25-Feb-2015	Ebola virus/H.sapiens-wt/SLE/2015/Makona-0807_C1_PL3984
ssGP Zaire ebolavirus.	ALX31153.1	973431306	297	Sierra Leone	29-Jun-2015	Ebola virus/H.sapiens-wt/SLE/2015/Makona-0807_C1_PL8630
sGP Zaire ebolavirus.	ALX31152.1	973431305	364	Sierra Leone	29-Jun-2015	Ebola virus/H.sapiens-wt/SLE/2015/Makona-0807_C1_PL8630
ssGP Zaire ebolavirus.	ALX31133.1	973431283	297	Sierra Leone	02-Jun-2015	Ebola virus/H.sapiens-wt/SLE/2015/Makona-0806_C1_PL7551
sGP Zaire ebolavirus.	ALX31132.1	973431282	364	Sierra Leone	02-Jun-2015	Ebola virus/H.sapiens-wt/SLE/2015/Makona-0806_C1_PL7551
ssGP Zaire ebolavirus.	ALX31113.1	973431260	297	Sierra Leone	16-Jul-2015	Ebola virus/H.sapiens-wt/SLE/2015/Makona-0908_C1_KT7105B
sGP Zaire ebolavirus.	ALX31112.1	973431259	364	Sierra Leone	16-Jul-2015	Ebola virus/H.sapiens-wt/SLE/2015/Makona-0908_C1_KT7105B
virion spike glycoprotein precursor Zaire ebolavirus.	ALX31111.1	973431258	676	Sierra Leone	16-Jul-2015	Ebola virus/H.sapiens-wt/SLE/2015/Makona-0908_C1_KT7105B
ssGP Zaire ebolavirus.	ALX31069.1	973431209	297	Sierra Leone	07-Jan-2015	Ebola virus/H.sapiens-wt/SLE/2015/Makona-3007_C2_77644_EMLK
sGP Zaire ebolavirus.	ALX31068.1	973431208	364	Sierra Leone	07-Jan-2015	Ebola virus/H.sapiens-wt/SLE/2015/Makona-3007_C2_77644_EMLK
ssGP Zaire ebolavirus.	ALX31056.1	973431194	297	Sierra Leone	22-Feb-2015	Ebola virus/H.sapiens-wt/SLE/2015/Makona-2607_C2_12180_EMLH
sGP Zaire ebolavirus.	ALX31055.1	973431193	364	Sierra Leone	22-Feb-2015	Ebola virus/H.sapiens-wt/SLE/2015/Makona-2607_C2_12180_EMLH
ssGP Zaire ebolavirus.	ALX31042.1	973431178	297	Sierra Leone	13-Apr-2015	Ebola virus/H.sapiens-wt/SLE/2015/Makona-0205_C2_PL6158
sGP Zaire ebolavirus.	ALX31041.1	973431177	364	Sierra Leone	13-Apr-2015	Ebola virus/H.sapiens-wt/SLE/2015/Makona-0205_C2_PL6158
ssGP Zaire ebolavirus.	ALX31022.1	973431155	297	Sierra Leone	28-Feb-2015	Ebola virus/H.sapiens-wt/SLE/2015/Makona-0807_C1_PL4121
sGP Zaire ebolavirus.	ALX31021.1	973431154	364	Sierra Leone	28-Feb-2015	Ebola virus/H.sapiens-wt/SLE/2015/Makona-0807_C1_PL4121
virion spike glycoprotein precursor Zaire ebolavirus.	ALX31020.1	973431153	676	Sierra Leone	28-Feb-2015	Ebola virus/H.sapiens-wt/SLE/2015/Makona-0807_C1_PL4121
ssGP Zaire ebolavirus.	ALX30995.1	973431124	297	Sierra Leone	17-Jan-2015	Ebola virus/H.sapiens-wt/SLE/2015/Makona-2605_C1_MK1197
sGP Zaire ebolavirus.	ALX30994.1	973431123	364	Sierra Leone	17-Jan-2015	Ebola virus/H.sapiens-wt/SLE/2015/Makona-2605_C1_MK1197
ssGP Zaire ebolavirus.	ALX30988.1	973431116	297	Sierra Leone	10-Mar-2015	Ebola virus/H.sapiens-wt/SLE/2015/Makona-2208_C1_MK2918R
sGP Zaire ebolavirus.	ALX30987.1	973431115	364	Sierra Leone	10-Mar-2015	Ebola virus/H.sapiens-wt/SLE/2015/Makona-2208_C1_MK2918R
ssGP Zaire ebolavirus.	ALX30975.1	973431101	297	Sierra Leone	19-Apr-2015	Ebola virus/H.sapiens-wt/SLE/2015/Makona-0807_C1_14743_EMLK
sGP Zaire ebolavirus.	ALX30974.1	973431100	364	Sierra Leone	19-Apr-2015	Ebola virus/H.sapiens-wt/SLE/2015/Makona-0807_C1_14743_EMLK
envelope glycoprotein Sudan ebolavirus.	ALT19781.1	965570407	676	Sudan	16-Oct-2000	Sudan virus/H. sapiens-tc/SDN/2000/Gulu-200011676
envelope glycoprotein Bundibugyo ebolavirus.	ALT19772.1	965570389	676	Uganda	14-Nov-2007	Bundibugyo virus/H. sapiens-tc/UGA/2007/Bundibugyo-200706291
envelope glycoprotein Tai Forest ebolavirus.	ALT19763.1	965570374	676	Cote dIvoire	27-Nov-1994	Tai Forest virus/H. sapiens-tc/CIV/1994/Tai Forest-CDC807212
envelope glycoprotein Ebola virus.	ALT19754.1	965570359	676	Zaire	04-May-1995	Ebola virus/H. sapiens-tc/COD/1995/Kikwit-9510622
envelope glycoprotein Ebola virus.	ALT19745.1	965570347	676	Zaire	04-May-1995	Ebola virus/H. sapiens-tc/COD/1995/Kikwit-9510632
envelope glycoprotein Ebola virus.	ALT19736.1	965570336	676	Zaire	04-May-1995	Ebola virus/H. sapiens-tc/COD/1995/Kikwit-9510627
envelope glycoprotein Ebola virus.	ALT19727.1	965570325	676	Zaire	04-May-1995	Ebola virus/H. sapiens-tc/COD/1995/Kikwit-9510628
envelope glycoprotein Ebola virus.	ALT19718.1	965570314	676	Zaire	04-May-1995	Ebola virus/H. sapiens-tc/COD/1995/Kikwit-9510621
envelope glycoprotein Ebola virus.	ALT19709.1	965570302	676	Zaire	04-May-1995	Ebola virus/H. sapiens-tc/COD/1995/Kikwit-9510626
envelope glycoprotein Ebola virus.	ALT19700.1	965570291	676	Zaire	04-May-1995	Ebola virus/H. sapiens-tc/COD/1995/Kikwit-9510625
envelope glycoprotein Ebola virus.	ALT19691.1	965570279	676	Zaire	04-May-1995	Ebola virus/H. sapiens-tc/COD/1995/Kikwit-9510624
envelope glycoprotein Ebola virus.	ALT19682.1	965570267	676	Zaire	04-May-1995	Ebola virus/H. sapiens-tc/COD/1995/Kikwit-9510629
envelope glycoprotein Ebola virus.	ALT19673.1	965570256	676	Zaire	04-May-1995	Ebola virus/H. sapiens-tc/COD/1995/Kikwit-9510630
envelope glycoprotein Ebola virus.	ALT19664.1	965570245	676	Zaire	04-May-1995	Ebola virus/H. sapiens-tc/COD/1995/Kikwit-9510631
envelope glycoprotein Ebola virus.	ALT19655.1	965570227	676	Zaire	04-May-1995	Ebola virus/H. sapiens-tc/COD/1995/Kikwit-9510623
sGP Zaire ebolavirus.	ALT19604.1	965569740	372	N/A	N/A	Ebola virus/H.sapiens-rec/COD/1976/Yambuku-Mayinga-eGFP-SUDV_GP
GP Zaire ebolavirus.	ALT19603.1	965569739	676	N/A	N/A	Ebola virus/H.sapiens-rec/COD/1976/Yambuku-Mayinga-eGFP-SUDV_GP
GP Zaire ebolavirus.	ALT19595.1	965569728	674	N/A	N/A	Ebola virus/H.sapiens-rec/COD/1976/Yambuku-Mayinga-eGFP- MARV_GPed
GP Zaire ebolavirus.	ALT19587.1	965569718	681	N/A	N/A	Ebola virus/H.sapiens-rec/COD/1976/Yambuku-Mayinga-eGFP-MARV_GP
GP Zaire ebolavirus.	ALT19570.1	965569696	676	N/A	N/A	Ebola virus/H.sapiens-rec/COD/1976/Yambuku-Mayinga-eGFP- BDBV_GPdelta_sGP
putative ssGP Zaire ebolavirus.	ALT19562.1	965569685	302	N/A	N/A	Ebola virus/H.sapiens-rec/COD/1976/Yambuku-Mayinga-eGFP-BDBV_GP
sGP Zaire ebolavirus.	ALT19561.1	965569684	373	N/A	N/A	Ebola virus/H.sapiens-rec/COD/1976/Yambuku-Mayinga-eGFP-BDBV_GP
GP Zaire ebolavirus.	ALT19560.1	965569683	676	N/A	N/A	Ebola virus/H.sapiens-rec/COD/1976/Yambuku-Mayinga-eGFP-BDBV_GP
ssGP Zaire ebolavirus.	ALQ12278.1	957742315	297	United Kingdom	08-Oct-2015	Ebola virus/H.sapiens-wt/GBR/2015/Makona-UK2
sGP Zaire ebolavirus.	ALQ12277.1	957742314	364	United Kingdom	08-Oct-2015	Ebola virus/H.sapiens-wt/GBR/2015/Makona-UK2
virion spike glycoprotein precursor Zaire ebolavirus.	ALQ12276.1	957742313	676	United Kingdom	08-Oct-2015	Ebola virus/H.sapiens-wt/GBR/2015/Makona-UK2
ssGP Zaire ebolavirus.	ALQ12269.1	957742305	297	United Kingdom	08-Oct-2015	Ebola virus/H.sapiens-wt/GBR/2015/Makona-UK2
sGP Zaire ebolavirus.	ALQ12268.1	957742304	364	United Kingdom	08-Oct-2015	Ebola virus/H.sapiens-wt/GBR/2015/Makona-UK2
virion spike glycoprotein precursor Zaire ebolavirus.	ALQ12267.1	957742303	676	United Kingdom	08-Oct-2015	Ebola virus/H.sapiens-wt/GBR/2015/Makona-UK2
ssGP Zaire ebolavirus.	ALO75891.1	953525496	297	Italy	May-2015	Ebola virus/H.sapiens-tc/ITA/2015/Makona-INMI2
sGP Zaire ebolavirus.	ALO75890.1	953525495	364	Italy	May-2015	Ebola virus/H.sapiens-tc/ITA/2015/Makona-INMI2
virion spike glycoprotein precursor Zaire ebolavirus.	ALO75889.1	953525494	676	Italy	May-2015	Ebola virus/H.sapiens-tc/ITA/2015/Makona-INMI2
ssGP Zaire ebolavirus.	ALG01263.1	930627132	297	Liberia: Grand Bassa	26-Aug-2014	Ebola virus/H.sapiens-wt/LBR/2014/Makona-LIBR10078
sGP Zaire ebolavirus.	ALG01262.1	930627131	364	Liberia: Grand Bassa	26-Aug-2014	Ebola virus/H.sapiens-wt/LBR/2014/Makona-LIBR10078
virion spike glycoprotein precursor Zaire ebolavirus.	ALG01261.1	930627130	676	Liberia: Grand Bassa	26-Aug-2014	Ebola virus/H.sapiens-wt/LBR/2014/Makona-LIBR10078
ssGP Zaire ebolavirus.	ALG01254.1	930627122	297	Liberia: Grand Bassa	13-Sep-2014	Ebola virus/H.sapiens-wt/LBR/2014/Makona-LIBR10155
sGP Zaire ebolavirus.	ALG01253.1	930627121	364	Liberia: Grand Bassa	13-Sep-2014	Ebola virus/H.sapiens-wt/LBR/2014/Makona-LIBR10155
virion spike glycoprotein precursor Zaire ebolavirus.	ALG01252.1	930627120	676	Liberia: Grand Bassa	13-Sep-2014	Ebola virus/H.sapiens-wt/LBR/2014/Makona-LIBR10155
ssGP Zaire ebolavirus.	ALG01245.1	930627112	297	Liberia: Nimba	20-Sep-2014	Ebola virus/H.sapiens-wt/LBR/2014/Makona-LIBR10148
sGP Zaire ebolavirus.	ALG01244.1	930627111	364	Liberia: Nimba	20-Sep-2014	Ebola virus/H.sapiens-wt/LBR/2014/Makona-LIBR10148
virion spike glycoprotein precursor Zaire ebolavirus.	ALG01243.1	930627110	676	Liberia: Nimba	20-Sep-2014	Ebola virus/H.sapiens-wt/LBR/2014/Makona-LIBR10148
ssGP Zaire ebolavirus.	ALG01236.1	930627102	297	Liberia	16-Aug-2014	Ebola virus/H.sapiens-wt/LBR/2014/Makona-LIBR10027
sGP Zaire ebolavirus.	ALG01235.1	930627101	364	Liberia	16-Aug-2014	Ebola virus/H.sapiens-wt/LBR/2014/Makona-LIBR10027
virion spike glycoprotein precursor Zaire ebolavirus.	ALG01234.1	930627100	676	Liberia	16-Aug-2014	Ebola virus/H.sapiens-wt/LBR/2014/Makona-LIBR10027
ssGP Zaire ebolavirus.	ALG01227.1	930627092	297	Liberia: Montserrado	19-Aug-2014	Ebola virus/H.sapiens-wt/LBR/2014/Makona-LIBR10017
sGP Zaire ebolavirus.	ALG01226.1	930627091	364	Liberia: Montserrado	19-Aug-2014	Ebola virus/H.sapiens-wt/LBR/2014/Makona-LIBR10017
virion spike glycoprotein precursor Zaire ebolavirus.	ALG01225.1	930627090	676	Liberia: Montserrado	19-Aug-2014	Ebola virus/H.sapiens-wt/LBR/2014/Makona-LIBR10017
ssGP Zaire ebolavirus.	ALG01218.1	930627082	297	Liberia	18-Aug-2014	Ebola virus/H.sapiens-wt/LBR/2014/Makona-LIBR10020
sGP Zaire ebolavirus.	ALG01217.1	930627081	364	Liberia	18-Aug-2014	Ebola virus/H.sapiens-wt/LBR/2014/Makona-LIBR10020
virion spike glycoprotein precursor Zaire ebolavirus.	ALG01216.1	930627080	676	Liberia	18-Aug-2014	Ebola virus/H.sapiens-wt/LBR/2014/Makona-LIBR10020
ssGP Zaire ebolavirus.	ALG01209.1	930627072	297	Liberia: Bomi	10-Nov-2014	Ebola virus/H.sapiens-wt/LBR/2014/Makona-LIBR0118
sGP Zaire ebolavirus.	ALG01208.1	930627071	364	Liberia: Bomi	10-Nov-2014	Ebola virus/H.sapiens-wt/LBR/2014/Makona-LIBR0118
virion spike glycoprotein precursor Zaire ebolavirus.	ALG01207.1	930627070	676	Liberia: Bomi	10-Nov-2014	Ebola virus/H.sapiens-wt/LBR/2014/Makona-LIBR0118
ssGP Zaire ebolavirus.	ALG01200.1	930627062	297	Liberia: Montserrado	28-Nov-2014	Ebola virus/H.sapiens-wt/LBR/2014/Makona-LIBR0380
sGP Zaire ebolavirus.	ALG01199.1	930627061	364	Liberia: Montserrado	28-Nov-2014	Ebola virus/H.sapiens-wt/LBR/2014/Makona-LIBR0380
virion spike glycoprotein precursor Zaire ebolavirus.	ALG01198.1	930627060	676	Liberia: Montserrado	28-Nov-2014	Ebola virus/H.sapiens-wt/LBR/2014/Makona-LIBR0380
ssGP Zaire ebolavirus.	ALG01191.1	930627052	297	Liberia	01-Sep-2014	Ebola virus/H.sapiens-wt/LBR/2014/Makona-LIBR10172
sGP Zaire ebolavirus.	ALG01190.1	930627051	364	Liberia	01-Sep-2014	Ebola virus/H.sapiens-wt/LBR/2014/Makona-LIBR10172
virion spike glycoprotein precursor Zaire ebolavirus.	ALG01189.1	930627050	676	Liberia	01-Sep-2014	Ebola virus/H.sapiens-wt/LBR/2014/Makona-LIBR10172
ssGP Zaire ebolavirus.	ALG01182.1	930627042	297	Liberia: Montserrado	22-Dec-2014	Ebola virus/H.sapiens-wt/LBR/2014/Makona-LIBR0622
sGP Zaire ebolavirus.	ALG01181.1	930627041	364	Liberia: Montserrado	22-Dec-2014	Ebola virus/H.sapiens-wt/LBR/2014/Makona-LIBR0622
virion spike glycoprotein precursor Zaire ebolavirus.	ALG01180.1	930627040	676	Liberia: Montserrado	22-Dec-2014	Ebola virus/H.sapiens-wt/LBR/2014/Makona-LIBR0622
ssGP Zaire ebolavirus.	ALG01173.1	930627032	297	Liberia: Sinoe	14-Oct-2014	Ebola virus/H.sapiens-wt/LBR/2014/Makona-LIBR10261
sGP Zaire ebolavirus.	ALG01172.1	930627031	364	Liberia: Sinoe	14-Oct-2014	Ebola virus/H.sapiens-wt/LBR/2014/Makona-LIBR10261
virion spike glycoprotein precursor Zaire ebolavirus.	ALG01171.1	930627030	676	Liberia: Sinoe	14-Oct-2014	Ebola virus/H.sapiens-wt/LBR/2014/Makona-LIBR10261
ssGP Zaire ebolavirus.	ALG01164.1	930627022	297	Liberia	22-Aug-2014	Ebola virus/H.sapiens-wt/LBR/2014/Makona-LIBR10100
sGP Zaire ebolavirus.	ALG01163.1	930627021	364	Liberia	22-Aug-2014	Ebola virus/H.sapiens-wt/LBR/2014/Makona-LIBR10100
virion spike glycoprotein precursor Zaire ebolavirus.	ALG01162.1	930627020	676	Liberia	22-Aug-2014	Ebola virus/H.sapiens-wt/LBR/2014/Makona-LIBR10100
ssGP Zaire ebolavirus.	ALG01155.1	930627012	297	Liberia: Montserrado	16-Oct-2014	Ebola virus/H.sapiens-wt/LBR/2014/Makona-LIBR10262
sGP Zaire ebolavirus.	ALG01154.1	930627011	364	Liberia: Montserrado	16-Oct-2014	Ebola virus/H.sapiens-wt/LBR/2014/Makona-LIBR10262
virion spike glycoprotein precursor Zaire ebolavirus.	ALG01153.1	930627010	676	Liberia: Montserrado	16-Oct-2014	Ebola virus/H.sapiens-wt/LBR/2014/Makona-LIBR10262
ssGP Zaire ebolavirus.	ALG01146.1	930627002	297	Liberia	29-Sep-2014	Ebola virus/H.sapiens-wt/LBR/2014/Makona-LIBR10218
sGP Zaire ebolavirus.	ALG01145.1	930627001	364	Liberia	29-Sep-2014	Ebola virus/H.sapiens-wt/LBR/2014/Makona-LIBR10218
virion spike glycoprotein precursor Zaire ebolavirus.	ALG01144.1	930627000	676	Liberia	29-Sep-2014	Ebola virus/H.sapiens-wt/LBR/2014/Makona-LIBR10218
ssGP Zaire ebolavirus.	ALG01137.1	930626992	297	Liberia	26-Aug-2014	Ebola virus/H.sapiens-wt/LBR/2014/Makona-LIBR10196
sGP Zaire ebolavirus.	ALG01136.1	930626991	364	Liberia	26-Aug-2014	Ebola virus/H.sapiens-wt/LBR/2014/Makona-LIBR10196
virion spike glycoprotein precursor Zaire ebolavirus.	ALG01135.1	930626990	676	Liberia	26-Aug-2014	Ebola virus/H.sapiens-wt/LBR/2014/Makona-LIBR10196
ssGP Zaire ebolavirus.	ALG01128.1	930626982	297	Liberia: Margibi	16-Sep-2014	Ebola virus/H.sapiens-wt/LBR/2014/Makona-LIBR10253
sGP Zaire ebolavirus.	ALG01127.1	930626981	364	Liberia: Margibi	16-Sep-2014	Ebola virus/H.sapiens-wt/LBR/2014/Makona-LIBR10253
virion spike glycoprotein precursor Zaire ebolavirus.	ALG01126.1	930626980	676	Liberia: Margibi	16-Sep-2014	Ebola virus/H.sapiens-wt/LBR/2014/Makona-LIBR10253
ssGP Zaire ebolavirus.	ALG01119.1	930626972	297	Liberia	27-Aug-2014	Ebola virus/H.sapiens-wt/LBR/2014/Makona-LIBR10204
sGP Zaire ebolavirus.	ALG01118.1	930626971	364	Liberia	27-Aug-2014	Ebola virus/H.sapiens-wt/LBR/2014/Makona-LIBR10204
virion spike glycoprotein precursor Zaire ebolavirus.	ALG01117.1	930626970	676	Liberia	27-Aug-2014	Ebola virus/H.sapiens-wt/LBR/2014/Makona-LIBR10204
ssGP Zaire ebolavirus.	ALG01110.1	930626962	297	Liberia	22-Nov-2014	Ebola virus/H.sapiens-wt/LBR/2014/Makona-LIBR0279
sGP Zaire ebolavirus.	ALG01109.1	930626961	364	Liberia	22-Nov-2014	Ebola virus/H.sapiens-wt/LBR/2014/Makona-LIBR0279
virion spike glycoprotein precursor Zaire ebolavirus.	ALG01108.1	930626960	676	Liberia	22-Nov-2014	Ebola virus/H.sapiens-wt/LBR/2014/Makona-LIBR0279
ssGP Zaire ebolavirus.	ALG01101.1	930626952	297	Liberia: Montserrado	14-Nov-2014	Ebola virus/H.sapiens-wt/LBR/2014/Makona-LIBR0177
sGP Zaire ebolavirus.	ALG01100.1	930626951	364	Liberia: Montserrado	14-Nov-2014	Ebola virus/H.sapiens-wt/LBR/2014/Makona-LIBR0177
virion spike glycoprotein precursor Zaire ebolavirus.	ALG01099.1	930626950	676	Liberia: Montserrado	14-Nov-2014	Ebola virus/H.sapiens-wt/LBR/2014/Makona-LIBR0177
ssGP Zaire ebolavirus.	ALG01092.1	930626942	297	Liberia: Margibi	16-Aug-2014	Ebola virus/H.sapiens-wt/LBR/2014/Makona-LIBR10031
sGP Zaire ebolavirus.	ALG01091.1	930626941	364	Liberia: Margibi	16-Aug-2014	Ebola virus/H.sapiens-wt/LBR/2014/Makona-LIBR10031
virion spike glycoprotein precursor Zaire ebolavirus.	ALG01090.1	930626940	676	Liberia: Margibi	16-Aug-2014	Ebola virus/H.sapiens-wt/LBR/2014/Makona-LIBR10031
ssGP Zaire ebolavirus.	ALG01083.1	930626932	297	Liberia	14-Jul-2014	Ebola virus/H.sapiens-wt/LBR/2014/Makona-LIBR10248
sGP Zaire ebolavirus.	ALG01082.1	930626931	364	Liberia	14-Jul-2014	Ebola virus/H.sapiens-wt/LBR/2014/Makona-LIBR10248
virion spike glycoprotein precursor Zaire ebolavirus.	ALG01081.1	930626930	676	Liberia	14-Jul-2014	Ebola virus/H.sapiens-wt/LBR/2014/Makona-LIBR10248
ssGP Zaire ebolavirus.	ALG01074.1	930626922	297	Liberia: Margibi	23-Sep-2014	Ebola virus/H.sapiens-wt/LBR/2014/Makona-LIBR10056
sGP Zaire ebolavirus.	ALG01073.1	930626921	364	Liberia: Margibi	23-Sep-2014	Ebola virus/H.sapiens-wt/LBR/2014/Makona-LIBR10056
virion spike glycoprotein precursor Zaire ebolavirus.	ALG01072.1	930626920	676	Liberia: Margibi	23-Sep-2014	Ebola virus/H.sapiens-wt/LBR/2014/Makona-LIBR10056
ssGP Zaire ebolavirus.	ALG01065.1	930626912	297	Liberia	11-Jul-2014	Ebola virus/H.sapiens-wt/LBR/2014/Makona-LIBR10237
sGP Zaire ebolavirus.	ALG01064.1	930626911	364	Liberia	11-Jul-2014	Ebola virus/H.sapiens-wt/LBR/2014/Makona-LIBR10237
virion spike glycoprotein precursor Zaire ebolavirus.	ALG01063.1	930626910	676	Liberia	11-Jul-2014	Ebola virus/H.sapiens-wt/LBR/2014/Makona-LIBR10237
ssGP Zaire ebolavirus.	ALG01056.1	930626902	297	Liberia: Montserrado	07-Nov-2014	Ebola virus/H.sapiens-wt/LBR/2014/Makona-LIBR0079
sGP Zaire ebolavirus.	ALG01055.1	930626901	364	Liberia: Montserrado	07-Nov-2014	Ebola virus/H.sapiens-wt/LBR/2014/Makona-LIBR0079
virion spike glycoprotein precursor Zaire ebolavirus.	ALG01054.1	930626900	676	Liberia: Montserrado	07-Nov-2014	Ebola virus/H.sapiens-wt/LBR/2014/Makona-LIBR0079
ssGP Zaire ebolavirus.	ALG01047.1	930626892	297	Liberia: Grand Bassa	10-Nov-2014	Ebola virus/H.sapiens-wt/LBR/2014/Makona-LIBR0114
sGP Zaire ebolavirus.	ALG01046.1	930626891	364	Liberia: Grand Bassa	10-Nov-2014	Ebola virus/H.sapiens-wt/LBR/2014/Makona-LIBR0114
virion spike glycoprotein precursor Zaire ebolavirus.	ALG01045.1	930626890	676	Liberia: Grand Bassa	10-Nov-2014	Ebola virus/H.sapiens-wt/LBR/2014/Makona-LIBR0114
ssGP Zaire ebolavirus.	ALG01038.1	930626882	297	Liberia: Bong	22-Aug-2014	Ebola virus/H.sapiens-wt/LBR/2014/Makona-LIBR10127
sGP Zaire ebolavirus.	ALG01037.1	930626881	364	Liberia: Bong	22-Aug-2014	Ebola virus/H.sapiens-wt/LBR/2014/Makona-LIBR10127
virion spike glycoprotein precursor Zaire ebolavirus.	ALG01036.1	930626880	676	Liberia: Bong	22-Aug-2014	Ebola virus/H.sapiens-wt/LBR/2014/Makona-LIBR10127
ssGP Zaire ebolavirus.	ALG01029.1	930626872	297	Liberia	20-Sep-2014	Ebola virus/H.sapiens-wt/LBR/2014/Makona-LIBR10144
sGP Zaire ebolavirus.	ALG01028.1	930626871	364	Liberia	20-Sep-2014	Ebola virus/H.sapiens-wt/LBR/2014/Makona-LIBR10144
virion spike glycoprotein precursor Zaire ebolavirus.	ALG01027.1	930626870	676	Liberia	20-Sep-2014	Ebola virus/H.sapiens-wt/LBR/2014/Makona-LIBR10144
ssGP Zaire ebolavirus.	ALG01020.1	930626862	297	Liberia	01-Oct-2014	Ebola virus/H.sapiens-wt/LBR/2014/Makona-LIBR10050
sGP Zaire ebolavirus.	ALG01019.1	930626861	364	Liberia	01-Oct-2014	Ebola virus/H.sapiens-wt/LBR/2014/Makona-LIBR10050
virion spike glycoprotein precursor Zaire ebolavirus.	ALG01018.1	930626860	676	Liberia	01-Oct-2014	Ebola virus/H.sapiens-wt/LBR/2014/Makona-LIBR10050
ssGP Zaire ebolavirus.	ALG01011.1	930626852	297	Liberia: Bong	02-Oct-2014	Ebola virus/H.sapiens-wt/LBR/2014/Makona-LIBR10255
sGP Zaire ebolavirus.	ALG01010.1	930626851	364	Liberia: Bong	02-Oct-2014	Ebola virus/H.sapiens-wt/LBR/2014/Makona-LIBR10255
virion spike glycoprotein precursor Zaire ebolavirus.	ALG01009.1	930626850	676	Liberia: Bong	02-Oct-2014	Ebola virus/H.sapiens-wt/LBR/2014/Makona-LIBR10255
ssGP Zaire ebolavirus.	ALG01002.1	930626842	297	Liberia	02-Oct-2014	Ebola virus/H.sapiens-wt/LBR/2014/Makona-LIBR10254
sGP Zaire ebolavirus.	ALG01001.1	930626841	364	Liberia	02-Oct-2014	Ebola virus/H.sapiens-wt/LBR/2014/Makona-LIBR10254
virion spike glycoprotein precursor Zaire ebolavirus.	ALG01000.1	930626840	676	Liberia	02-Oct-2014	Ebola virus/H.sapiens-wt/LBR/2014/Makona-LIBR10254
ssGP Zaire ebolavirus.	ALG00993.1	930626832	297	Liberia	16-Aug-2014	Ebola virus/H.sapiens-wt/LBR/2014/Makona-LIBR10032
sGP Zaire ebolavirus.	ALG00992.1	930626831	364	Liberia	16-Aug-2014	Ebola virus/H.sapiens-wt/LBR/2014/Makona-LIBR10032
virion spike glycoprotein precursor Zaire ebolavirus.	ALG00991.1	930626830	676	Liberia	16-Aug-2014	Ebola virus/H.sapiens-wt/LBR/2014/Makona-LIBR10032
ssGP Zaire ebolavirus.	ALG00984.1	930626822	297	Liberia: Grand Kru	15-Sep-2014	Ebola virus/H.sapiens-wt/LBR/2014/Makona-LIBR10252
sGP Zaire ebolavirus.	ALG00983.1	930626821	364	Liberia: Grand Kru	15-Sep-2014	Ebola virus/H.sapiens-wt/LBR/2014/Makona-LIBR10252
virion spike glycoprotein precursor Zaire ebolavirus.	ALG00982.1	930626820	676	Liberia: Grand Kru	15-Sep-2014	Ebola virus/H.sapiens-wt/LBR/2014/Makona-LIBR10252
ssGP Zaire ebolavirus.	ALG00975.1	930626812	297	Liberia	09-Sep-2014	Ebola virus/H.sapiens-wt/LBR/2014/Makona-LIBR10139
sGP Zaire ebolavirus.	ALG00974.1	930626811	364	Liberia	09-Sep-2014	Ebola virus/H.sapiens-wt/LBR/2014/Makona-LIBR10139
virion spike glycoprotein precursor Zaire ebolavirus.	ALG00973.1	930626810	676	Liberia	09-Sep-2014	Ebola virus/H.sapiens-wt/LBR/2014/Makona-LIBR10139
ssGP Zaire ebolavirus.	ALG00966.1	930626802	297	Liberia	26-Aug-2014	Ebola virus/H.sapiens-wt/LBR/2014/Makona-LIBR10195
sGP Zaire ebolavirus.	ALG00965.1	930626801	364	Liberia	26-Aug-2014	Ebola virus/H.sapiens-wt/LBR/2014/Makona-LIBR10195
virion spike glycoprotein precursor Zaire ebolavirus.	ALG00964.1	930626800	676	Liberia	26-Aug-2014	Ebola virus/H.sapiens-wt/LBR/2014/Makona-LIBR10195
ssGP Zaire ebolavirus.	ALG00957.1	930626792	297	Liberia	09-Sep-2014	Ebola virus/H.sapiens-wt/LBR/2014/Makona-LIBR10136
sGP Zaire ebolavirus.	ALG00956.1	930626791	364	Liberia	09-Sep-2014	Ebola virus/H.sapiens-wt/LBR/2014/Makona-LIBR10136
virion spike glycoprotein precursor Zaire ebolavirus.	ALG00955.1	930626790	676	Liberia	09-Sep-2014	Ebola virus/H.sapiens-wt/LBR/2014/Makona-LIBR10136
ssGP Zaire ebolavirus.	ALG00948.1	930626782	297	Liberia	25-Jun-2014	Ebola virus/H.sapiens-wt/LBR/2014/Makona-LIBR10241
sGP Zaire ebolavirus.	ALG00947.1	930626781	364	Liberia	25-Jun-2014	Ebola virus/H.sapiens-wt/LBR/2014/Makona-LIBR10241
virion spike glycoprotein precursor Zaire ebolavirus.	ALG00946.1	930626780	676	Liberia	25-Jun-2014	Ebola virus/H.sapiens-wt/LBR/2014/Makona-LIBR10241
ssGP Zaire ebolavirus.	ALG00939.1	930626772	297	Liberia	04-Aug-2014	Ebola virus/H.sapiens-wt/LBR/2014/Makona-LIBR10042
sGP Zaire ebolavirus.	ALG00938.1	930626771	364	Liberia	04-Aug-2014	Ebola virus/H.sapiens-wt/LBR/2014/Makona-LIBR10042
virion spike glycoprotein precursor Zaire ebolavirus.	ALG00937.1	930626770	676	Liberia	04-Aug-2014	Ebola virus/H.sapiens-wt/LBR/2014/Makona-LIBR10042
ssGP Zaire ebolavirus.	ALG00930.1	930626762	297	Liberia	07-Sep-2014	Ebola virus/H.sapiens-wt/LBR/2014/Makona-LIBR10135
sGP Zaire ebolavirus.	ALG00929.1	930626761	364	Liberia	07-Sep-2014	Ebola virus/H.sapiens-wt/LBR/2014/Makona-LIBR10135
virion spike glycoprotein precursor Zaire ebolavirus.	ALG00928.1	930626760	676	Liberia	07-Sep-2014	Ebola virus/H.sapiens-wt/LBR/2014/Makona-LIBR10135
ssGP Zaire ebolavirus.	ALG00921.1	930626752	297	Liberia: Grand Bassa	15-Aug-2014	Ebola virus/H.sapiens-wt/LBR/2014/Makona-LIBR10035
sGP Zaire ebolavirus.	ALG00920.1	930626751	364	Liberia: Grand Bassa	15-Aug-2014	Ebola virus/H.sapiens-wt/LBR/2014/Makona-LIBR10035
virion spike glycoprotein precursor Zaire ebolavirus.	ALG00919.1	930626750	676	Liberia: Grand Bassa	15-Aug-2014	Ebola virus/H.sapiens-wt/LBR/2014/Makona-LIBR10035
ssGP Zaire ebolavirus.	ALG00912.1	930626742	297	Liberia	01-Oct-2014	Ebola virus/H.sapiens-wt/LBR/2014/Makona-LIBR10052
sGP Zaire ebolavirus.	ALG00911.1	930626741	364	Liberia	01-Oct-2014	Ebola virus/H.sapiens-wt/LBR/2014/Makona-LIBR10052
virion spike glycoprotein precursor Zaire ebolavirus.	ALG00910.1	930626740	676	Liberia	01-Oct-2014	Ebola virus/H.sapiens-wt/LBR/2014/Makona-LIBR10052
ssGP Zaire ebolavirus.	ALG00903.1	930626732	297	Liberia: Margibi	16-Aug-2014	Ebola virus/H.sapiens-wt/LBR/2014/Makona-LIBR10030
sGP Zaire ebolavirus.	ALG00902.1	930626731	364	Liberia: Margibi	16-Aug-2014	Ebola virus/H.sapiens-wt/LBR/2014/Makona-LIBR10030
virion spike glycoprotein precursor Zaire ebolavirus.	ALG00901.1	930626730	676	Liberia: Margibi	16-Aug-2014	Ebola virus/H.sapiens-wt/LBR/2014/Makona-LIBR10030
ssGP Zaire ebolavirus.	ALG00894.1	930626722	297	Liberia	26-Aug-2014	Ebola virus/H.sapiens-wt/LBR/2014/Makona-LIBR10270
sGP Zaire ebolavirus.	ALG00893.1	930626721	364	Liberia	26-Aug-2014	Ebola virus/H.sapiens-wt/LBR/2014/Makona-LIBR10270
virion spike glycoprotein precursor Zaire ebolavirus.	ALG00892.1	930626720	676	Liberia	26-Aug-2014	Ebola virus/H.sapiens-wt/LBR/2014/Makona-LIBR10270
ssGP Zaire ebolavirus.	ALG00885.1	930626712	297	Liberia: Margibi	08-Sep-2014	Ebola virus/H.sapiens-wt/LBR/2014/Makona-LIBR10132
sGP Zaire ebolavirus.	ALG00884.1	930626711	364	Liberia: Margibi	08-Sep-2014	Ebola virus/H.sapiens-wt/LBR/2014/Makona-LIBR10132
virion spike glycoprotein precursor Zaire ebolavirus.	ALG00883.1	930626710	676	Liberia: Margibi	08-Sep-2014	Ebola virus/H.sapiens-wt/LBR/2014/Makona-LIBR10132
ssGP Zaire ebolavirus.	ALG00876.1	930626702	297	Liberia: Grand Bassa	10-Nov-2014	Ebola virus/H.sapiens-wt/LBR/2014/Makona-LIBR0115
sGP Zaire ebolavirus.	ALG00875.1	930626701	364	Liberia: Grand Bassa	10-Nov-2014	Ebola virus/H.sapiens-wt/LBR/2014/Makona-LIBR0115
virion spike glycoprotein precursor Zaire ebolavirus.	ALG00874.1	930626700	676	Liberia: Grand Bassa	10-Nov-2014	Ebola virus/H.sapiens-wt/LBR/2014/Makona-LIBR0115
ssGP Zaire ebolavirus.	ALN12281.1	949601185	297	Sierra Leone	19-Dec-2014	Ebola virus/H.sapiens-wt/SLE/2014/Makona-Goderich2
sGP Zaire ebolavirus.	ALN12280.1	949601184	364	Sierra Leone	19-Dec-2014	Ebola virus/H.sapiens-wt/SLE/2014/Makona-Goderich2
virion spike glycoprotein precursor Zaire ebolavirus.	ALN12279.1	949601183	676	Sierra Leone	19-Dec-2014	Ebola virus/H.sapiens-wt/SLE/2014/Makona-Goderich2
ssGP Zaire ebolavirus.	ALH21468.1	936348112	297	Guinea	2014	H.sapiens-wt/GIN/2014/Makona-Conakry-CREMS-2214
sGP Zaire ebolavirus.	ALH21464.1	936348108	364	Guinea	2014	H.sapiens-wt/GIN/2014/Makona-Conakry-CREMS-2214
virion spike glycoprotein precursor Zaire ebolavirus.	ALH21463.1	936348107	676	Guinea	2014	H.sapiens-wt/GIN/2014/Makona-Conakry-CREMS-2214
ssGP Zaire ebolavirus.	ALH21459.1	936348082	297	Guinea	2014	H.sapiens-wt/GIN/2014/Makona-Conakry-CREMS-1022
sGP Zaire ebolavirus.	ALH21455.1	936348078	364	Guinea	2014	H.sapiens-wt/GIN/2014/Makona-Conakry-CREMS-1022
virion spike glycoprotein precursor Zaire ebolavirus.	ALH21454.1	936348077	676	Guinea	2014	H.sapiens-wt/GIN/2014/Makona-Conakry-CREMS-1022
ssGP Zaire ebolavirus.	AKT08842.1	908275472	297	Sierra Leone	19-Feb-2015	Ebola virus H.sapiens-wt/SLE/2015/Makona-Goderich1
sGP Zaire ebolavirus.	AKT08841.1	908275471	364	Sierra Leone	19-Feb-2015	Ebola virus H.sapiens-wt/SLE/2015/Makona-Goderich1
virion spike glycoprotein precursor Zaire ebolavirus.	AKT08840.1	908275470	676	Sierra Leone	19-Feb-2015	Ebola virus H.sapiens-wt/SLE/2015/Makona-Goderich1
envelope glycoprotein Zaire ebolavirus.	AKI84276.1	824041267	676	Zaire: Kikwit	04-May-1995	Ebola virus/H.sapiens-tc/COD/1995/Kikwit-9510621
envelope glycoprotein Bundibugyo ebolavirus.	AKB09565.1	803773911	676	Uganda	01-Oct-2007	Bundibugyo virus/H.sapiens-tc/UGA/2007/Butalya-811250
envelope glycoprotein Ebola virus.	AKB09556.1	803773888	676	Democratic Republic of the Congo	01-Apr-1995	Ebola virus/H.sapiens-tc/COD/1995/Kikwit-807223
envelope glycoprotein Ebola virus.	AKB09547.1	803773864	676	Democratic Republic of the Congo	01-Oct-1976	Ebola virus/H.sapiens-tc/COD/1976/Yambuku-Mayinga
envelope glycoprotein Sudan ebolavirus.	AKB09538.1	803773834	676	Uganda	01-Oct-2000	Ebola virus/H.sapiens-tc/UGA/2000/Gulu-808892
ssGP Zaire ebolavirus.	ALF04603.1	929048741	297	Guinea: Conakry	13-Oct-2014	Ebola virus/H.sapiens-wt/GIN/2014/Makona-Conakry-211
sGP Zaire ebolavirus.	ALF04602.1	929048740	364	Guinea: Conakry	13-Oct-2014	Ebola virus/H.sapiens-wt/GIN/2014/Makona-Conakry-211
virion spike glycoprotein precursor Zaire ebolavirus.	ALF04601.1	929048739	676	Guinea: Conakry	13-Oct-2014	Ebola virus/H.sapiens-wt/GIN/2014/Makona-Conakry-211
ssGP Zaire ebolavirus.	ALF04597.1	929048734	297	Guinea: Conakry	14-Oct-2014	Ebola virus/H.sapiens-wt/GIN/2014/Makona-Conakry-223
sGP Zaire ebolavirus.	ALF04596.1	929048733	364	Guinea: Conakry	14-Oct-2014	Ebola virus/H.sapiens-wt/GIN/2014/Makona-Conakry-223
virion spike glycoprotein precursor Zaire ebolavirus.	ALF04592.1	929048729	676	Guinea: Conakry	14-Oct-2014	Ebola virus/H.sapiens-wt/GIN/2014/Makona-Conakry-223
ssGP Zaire ebolavirus.	ALF04585.1	929048721	297	Guinea: Kindia	18-Dec-2014	Ebola virus/H.sapiens-wt/GIN/2014/Makona-Kindia-802
sGP Zaire ebolavirus.	ALF04584.1	929048720	364	Guinea: Kindia	18-Dec-2014	Ebola virus/H.sapiens-wt/GIN/2014/Makona-Kindia-802
virion spike glycoprotein precursor Zaire ebolavirus.	ALF04583.1	929048719	676	Guinea: Kindia	18-Dec-2014	Ebola virus/H.sapiens-wt/GIN/2014/Makona-Kindia-802
ssGP Zaire ebolavirus.	AKU75584.1	913075146	297	Sierra Leone: Western Urban	30-Jun-2015	EBOV/DML14077/SLe/WesternUrban/20150630
sGP Zaire ebolavirus.	AKU75583.1	913075145	364	Sierra Leone: Western Urban	30-Jun-2015	EBOV/DML14077/SLe/WesternUrban/20150630
virion spike glycoprotein precursor Zaire ebolavirus.	AKU75582.1	913075144	676	Sierra Leone: Western Urban	30-Jun-2015	EBOV/DML14077/SLe/WesternUrban/20150630
ssGP Zaire ebolavirus.	AKU75575.1	913075136	297	Sierra Leone: Western Urban	11-Jul-2015	EBOV/DML14366/SLe/WesternUrban/20150711
sGP Zaire ebolavirus.	AKU75574.1	913075135	364	Sierra Leone: Western Urban	11-Jul-2015	EBOV/DML14366/SLe/WesternUrban/20150711
virion spike glycoprotein precursor Zaire ebolavirus.	AKU75573.1	913075134	676	Sierra Leone: Western Urban	11-Jul-2015	EBOV/DML14366/SLe/WesternUrban/20150711
ssGP Zaire ebolavirus.	AKU75566.1	913075126	297	Sierra Leone: Western Urban	03-Jul-2015	EBOV/DML14163/SLe/WesternUrban/20150703
sGP Zaire ebolavirus.	AKU75565.1	913075125	364	Sierra Leone: Western Urban	03-Jul-2015	EBOV/DML14163/SLe/WesternUrban/20150703
virion spike glycoprotein precursor Zaire ebolavirus.	AKU75564.1	913075124	676	Sierra Leone: Western Urban	03-Jul-2015	EBOV/DML14163/SLe/WesternUrban/20150703
ssGP Zaire ebolavirus.	AKU75557.1	913075116	297	Sierra Leone: Kono	10-Mar-2015	EBOV/DML25411/SLe/Kono/20150310
sGP Zaire ebolavirus.	AKU75556.1	913075115	364	Sierra Leone: Kono	10-Mar-2015	EBOV/DML25411/SLe/Kono/20150310
virion spike glycoprotein precursor Zaire ebolavirus.	AKU75555.1	913075114	676	Sierra Leone: Kono	10-Mar-2015	EBOV/DML25411/SLe/Kono/20150310
ssGP Zaire ebolavirus.	AKU75548.1	913075106	297	Sierra Leone: Kono	06-Mar-2015	EBOV/DML25344/SLe/Kono/20150306
sGP Zaire ebolavirus.	AKU75547.1	913075105	364	Sierra Leone: Kono	06-Mar-2015	EBOV/DML25344/SLe/Kono/20150306
virion spike glycoprotein precursor Zaire ebolavirus.	AKU75546.1	913075104	676	Sierra Leone: Kono	06-Mar-2015	EBOV/DML25344/SLe/Kono/20150306
ssGP Zaire ebolavirus.	AKU75539.1	913075096	297	Sierra Leone: Kono	23-Feb-2015	EBOV/DML25180/SLe/Kono/20150223
sGP Zaire ebolavirus.	AKU75538.1	913075095	364	Sierra Leone: Kono	23-Feb-2015	EBOV/DML25180/SLe/Kono/20150223
virion spike glycoprotein precursor Zaire ebolavirus.	AKU75537.1	913075094	676	Sierra Leone: Kono	23-Feb-2015	EBOV/DML25180/SLe/Kono/20150223
ssGP Zaire ebolavirus.	AKU75530.1	913075086	297	Sierra Leone: Kenema	18-Feb-2015	EBOV/DML25123/SLe/Kenema/20150218
sGP Zaire ebolavirus.	AKU75529.1	913075085	364	Sierra Leone: Kenema	18-Feb-2015	EBOV/DML25123/SLe/Kenema/20150218
virion spike glycoprotein precursor Zaire ebolavirus.	AKU75528.1	913075084	676	Sierra Leone: Kenema	18-Feb-2015	EBOV/DML25123/SLe/Kenema/20150218
ssGP Zaire ebolavirus.	AKU75521.1	913075076	297	Sierra Leone: Kono	19-Feb-2015	EBOV/DML25103/SLe/Kono/20150219
sGP Zaire ebolavirus.	AKU75520.1	913075075	358	Sierra Leone: Kono	19-Feb-2015	EBOV/DML25103/SLe/Kono/20150219
virion spike glycoprotein precursor Zaire ebolavirus.	AKU75519.1	913075074	676	Sierra Leone: Kono	19-Feb-2015	EBOV/DML25103/SLe/Kono/20150219
ssGP Zaire ebolavirus.	AKU75512.1	913075066	297	Sierra Leone: Kono	18-Feb-2015	EBOV/DML25083/SLe/Kono/20150218
sGP Zaire ebolavirus.	AKU75511.1	913075065	358	Sierra Leone: Kono	18-Feb-2015	EBOV/DML25083/SLe/Kono/20150218
virion spike glycoprotein precursor Zaire ebolavirus.	AKU75510.1	913075064	676	Sierra Leone: Kono	18-Feb-2015	EBOV/DML25083/SLe/Kono/20150218
ssGP Zaire ebolavirus.	AKU75503.1	913075056	297	Sierra Leone: Kono	06-Feb-2015	EBOV/DML24854/SLe/Kono/20150206
sGP Zaire ebolavirus.	AKU75502.1	913075055	364	Sierra Leone: Kono	06-Feb-2015	EBOV/DML24854/SLe/Kono/20150206
virion spike glycoprotein precursor Zaire ebolavirus.	AKU75501.1	913075054	676	Sierra Leone: Kono	06-Feb-2015	EBOV/DML24854/SLe/Kono/20150206
ssGP Zaire ebolavirus.	AKU75494.1	913075046	297	Sierra Leone: Kono	06-Feb-2015	EBOV/DML24853/SLe/Kono/20150206
sGP Zaire ebolavirus.	AKU75493.1	913075045	364	Sierra Leone: Kono	06-Feb-2015	EBOV/DML24853/SLe/Kono/20150206
virion spike glycoprotein precursor Zaire ebolavirus.	AKU75492.1	913075044	676	Sierra Leone: Kono	06-Feb-2015	EBOV/DML24853/SLe/Kono/20150206
ssGP Zaire ebolavirus.	AKU75485.1	913075036	297	Sierra Leone: Tonkolili	04-Feb-2015	EBOV/DML24825/SLe/Tonkolili/20150204
sGP Zaire ebolavirus.	AKU75484.1	913075035	358	Sierra Leone: Tonkolili	04-Feb-2015	EBOV/DML24825/SLe/Tonkolili/20150204
virion spike glycoprotein precursor Zaire ebolavirus.	AKU75483.1	913075034	676	Sierra Leone: Tonkolili	04-Feb-2015	EBOV/DML24825/SLe/Tonkolili/20150204
ssGP Zaire ebolavirus.	AKU75476.1	913075026	297	Sierra Leone: Kono	03-Feb-2015	EBOV/DML24818/SLe/Kono/20150203
sGP Zaire ebolavirus.	AKU75475.1	913075025	358	Sierra Leone: Kono	03-Feb-2015	EBOV/DML24818/SLe/Kono/20150203
virion spike glycoprotein precursor Zaire ebolavirus.	AKU75474.1	913075024	676	Sierra Leone: Kono	03-Feb-2015	EBOV/DML24818/SLe/Kono/20150203
ssGP Zaire ebolavirus.	AKU75467.1	913075016	297	Sierra Leone: Kono	30-Jan-2015	EBOV/DML24758/SLe/Kono/20150130
sGP Zaire ebolavirus.	AKU75466.1	913075015	364	Sierra Leone: Kono	30-Jan-2015	EBOV/DML24758/SLe/Kono/20150130
virion spike glycoprotein precursor Zaire ebolavirus.	AKU75465.1	913075014	676	Sierra Leone: Kono	30-Jan-2015	EBOV/DML24758/SLe/Kono/20150130
ssGP Zaire ebolavirus.	AKU75458.1	913075006	297	Sierra Leone: Kono	29-Jan-2015	EBOV/DML24720/SLe/Kono/20150129
sGP Zaire ebolavirus.	AKU75457.1	913075005	364	Sierra Leone: Kono	29-Jan-2015	EBOV/DML24720/SLe/Kono/20150129
virion spike glycoprotein precursor Zaire ebolavirus.	AKU75456.1	913075004	676	Sierra Leone: Kono	29-Jan-2015	EBOV/DML24720/SLe/Kono/20150129
ssGP Zaire ebolavirus.	AKU75449.1	913074996	297	Sierra Leone: Kono	28-Jan-2015	EBOV/DML24708/SLe/Kono/20150128
sGP Zaire ebolavirus.	AKU75448.1	913074995	364	Sierra Leone: Kono	28-Jan-2015	EBOV/DML24708/SLe/Kono/20150128
virion spike glycoprotein precursor Zaire ebolavirus.	AKU75447.1	913074994	676	Sierra Leone: Kono	28-Jan-2015	EBOV/DML24708/SLe/Kono/20150128
ssGP Zaire ebolavirus.	AKU75440.1	913074986	297	Sierra Leone: Kono	28-Jan-2015	EBOV/DML24706/SLe/Kono/20150128
sGP Zaire ebolavirus.	AKU75439.1	913074985	358	Sierra Leone: Kono	28-Jan-2015	EBOV/DML24706/SLe/Kono/20150128
virion spike glycoprotein precursor Zaire ebolavirus.	AKU75438.1	913074984	676	Sierra Leone: Kono	28-Jan-2015	EBOV/DML24706/SLe/Kono/20150128
ssGP Zaire ebolavirus.	AKU75431.1	913074976	297	Sierra Leone: Kono	26-Jan-2015	EBOV/DML24683/SLe/Kono/20150126
sGP Zaire ebolavirus.	AKU75430.1	913074975	364	Sierra Leone: Kono	26-Jan-2015	EBOV/DML24683/SLe/Kono/20150126
virion spike glycoprotein precursor Zaire ebolavirus.	AKU75429.1	913074974	676	Sierra Leone: Kono	26-Jan-2015	EBOV/DML24683/SLe/Kono/20150126
ssGP Zaire ebolavirus.	AKU75422.1	913074966	297	Sierra Leone: Kono	25-Jan-2015	EBOV/DML24677/SLe/Kono/20150125
sGP Zaire ebolavirus.	AKU75421.1	913074965	364	Sierra Leone: Kono	25-Jan-2015	EBOV/DML24677/SLe/Kono/20150125
virion spike glycoprotein precursor Zaire ebolavirus.	AKU75420.1	913074964	676	Sierra Leone: Kono	25-Jan-2015	EBOV/DML24677/SLe/Kono/20150125
ssGP Zaire ebolavirus.	AKU75413.1	913074956	297	Sierra Leone: Kono	25-Jan-2015	EBOV/DML24669/SLe/Kono/20150125
sGP Zaire ebolavirus.	AKU75412.1	913074955	364	Sierra Leone: Kono	25-Jan-2015	EBOV/DML24669/SLe/Kono/20150125
virion spike glycoprotein precursor Zaire ebolavirus.	AKU75411.1	913074954	676	Sierra Leone: Kono	25-Jan-2015	EBOV/DML24669/SLe/Kono/20150125
ssGP Zaire ebolavirus.	AKU75404.1	913074946	297	Sierra Leone: Kono	21-Jan-2015	EBOV/DML24620/SLe/Kono/20150121
sGP Zaire ebolavirus.	AKU75403.1	913074945	364	Sierra Leone: Kono	21-Jan-2015	EBOV/DML24620/SLe/Kono/20150121
virion spike glycoprotein precursor Zaire ebolavirus.	AKU75402.1	913074944	676	Sierra Leone: Kono	21-Jan-2015	EBOV/DML24620/SLe/Kono/20150121
ssGP Zaire ebolavirus.	AKU75395.1	913074936	297	Sierra Leone: Kono	21-Jan-2015	EBOV/DML24611/SLe/Kono/20150121
sGP Zaire ebolavirus.	AKU75394.1	913074935	358	Sierra Leone: Kono	21-Jan-2015	EBOV/DML24611/SLe/Kono/20150121
virion spike glycoprotein precursor Zaire ebolavirus.	AKU75393.1	913074934	676	Sierra Leone: Kono	21-Jan-2015	EBOV/DML24611/SLe/Kono/20150121
ssGP Zaire ebolavirus.	AKU75386.1	913074926	297	Sierra Leone: Kono	20-Jan-2015	EBOV/DML24608/SLe/Kono/20150120
sGP Zaire ebolavirus.	AKU75385.1	913074925	358	Sierra Leone: Kono	20-Jan-2015	EBOV/DML24608/SLe/Kono/20150120
virion spike glycoprotein precursor Zaire ebolavirus.	AKU75384.1	913074924	676	Sierra Leone: Kono	20-Jan-2015	EBOV/DML24608/SLe/Kono/20150120
ssGP Zaire ebolavirus.	AKU75377.1	913074916	297	Sierra Leone: Kono	20-Jan-2015	EBOV/DML24606/SLe/Kono/20150120
sGP Zaire ebolavirus.	AKU75376.1	913074915	364	Sierra Leone: Kono	20-Jan-2015	EBOV/DML24606/SLe/Kono/20150120
virion spike glycoprotein precursor Zaire ebolavirus.	AKU75375.1	913074914	676	Sierra Leone: Kono	20-Jan-2015	EBOV/DML24606/SLe/Kono/20150120
ssGP Zaire ebolavirus.	AKU75368.1	913074906	297	Sierra Leone: Kono	20-Jan-2015	EBOV/DML24605/SLe/Kono/20150120
sGP Zaire ebolavirus.	AKU75367.1	913074905	364	Sierra Leone: Kono	20-Jan-2015	EBOV/DML24605/SLe/Kono/20150120
virion spike glycoprotein precursor Zaire ebolavirus.	AKU75366.1	913074904	676	Sierra Leone: Kono	20-Jan-2015	EBOV/DML24605/SLe/Kono/20150120
ssGP Zaire ebolavirus.	AKU75359.1	913074896	297	Sierra Leone: Kono	20-Jan-2015	EBOV/DML24604/SLe/Kono/20150120
sGP Zaire ebolavirus.	AKU75358.1	913074895	364	Sierra Leone: Kono	20-Jan-2015	EBOV/DML24604/SLe/Kono/20150120
virion spike glycoprotein precursor Zaire ebolavirus.	AKU75357.1	913074894	676	Sierra Leone: Kono	20-Jan-2015	EBOV/DML24604/SLe/Kono/20150120
ssGP Zaire ebolavirus.	AKU75352.1	913074888	297	Sierra Leone: Kono	20-Jan-2015	EBOV/DML24601/SLe/Kono/20150120
sGP Zaire ebolavirus.	AKU75351.1	913074887	358	Sierra Leone: Kono	20-Jan-2015	EBOV/DML24601/SLe/Kono/20150120
virion spike glycoprotein precursor Zaire ebolavirus.	AKU75350.1	913074886	676	Sierra Leone: Kono	20-Jan-2015	EBOV/DML24601/SLe/Kono/20150120
ssGP Zaire ebolavirus.	AKU75341.1	913074876	297	Sierra Leone: Kono	20-Jan-2015	EBOV/DML24592/SLe/Kono/20150120
sGP Zaire ebolavirus.	AKU75340.1	913074875	358	Sierra Leone: Kono	20-Jan-2015	EBOV/DML24592/SLe/Kono/20150120
virion spike glycoprotein precursor Zaire ebolavirus.	AKU75339.1	913074874	676	Sierra Leone: Kono	20-Jan-2015	EBOV/DML24592/SLe/Kono/20150120
ssGP Zaire ebolavirus.	AKU75332.1	913074866	297	Sierra Leone: Kono	19-Jan-2015	EBOV/DML24581/SLe/Kono/20150119
sGP Zaire ebolavirus.	AKU75331.1	913074865	364	Sierra Leone: Kono	19-Jan-2015	EBOV/DML24581/SLe/Kono/20150119
virion spike glycoprotein precursor Zaire ebolavirus.	AKU75330.1	913074864	676	Sierra Leone: Kono	19-Jan-2015	EBOV/DML24581/SLe/Kono/20150119
sGP Zaire ebolavirus.	AKU75326.1	913074859	358	Sierra Leone: Kono	18-Jan-2015	EBOV/DML24573/SLe/Kono/20150118
ssGP Zaire ebolavirus.	AKU75322.1	913074855	297	Sierra Leone: Kono	18-Jan-2015	EBOV/DML24573/SLe/Kono/20150118
virion spike glycoprotein precursor Zaire ebolavirus.	AKU75321.1	913074854	676	Sierra Leone: Kono	18-Jan-2015	EBOV/DML24573/SLe/Kono/20150118
ssGP Zaire ebolavirus.	AKU75314.1	913074846	297	Sierra Leone: Kono	17-Jan-2015	EBOV/DML24553/SLe/Kono/20150117
sGP Zaire ebolavirus.	AKU75313.1	913074845	358	Sierra Leone: Kono	17-Jan-2015	EBOV/DML24553/SLe/Kono/20150117
virion spike glycoprotein precursor Zaire ebolavirus.	AKU75312.1	913074844	676	Sierra Leone: Kono	17-Jan-2015	EBOV/DML24553/SLe/Kono/20150117
ssGP Zaire ebolavirus.	AKU75305.1	913074836	297	Sierra Leone: Kono	17-Jan-2015	EBOV/DML24552/SLe/Kono/20150117
sGP Zaire ebolavirus.	AKU75304.1	913074835	364	Sierra Leone: Kono	17-Jan-2015	EBOV/DML24552/SLe/Kono/20150117
virion spike glycoprotein precursor Zaire ebolavirus.	AKU75303.1	913074834	676	Sierra Leone: Kono	17-Jan-2015	EBOV/DML24552/SLe/Kono/20150117
ssGP Zaire ebolavirus.	AKU75296.1	913074826	297	Sierra Leone: Kono	14-Jan-2015	EBOV/DML24511/SLe/Kono/20150114
sGP Zaire ebolavirus.	AKU75295.1	913074825	364	Sierra Leone: Kono	14-Jan-2015	EBOV/DML24511/SLe/Kono/20150114
virion spike glycoprotein precursor Zaire ebolavirus.	AKU75294.1	913074824	676	Sierra Leone: Kono	14-Jan-2015	EBOV/DML24511/SLe/Kono/20150114
ssGP Zaire ebolavirus.	AKU75287.1	913074816	297	Sierra Leone: Kono	14-Jan-2015	EBOV/DML24506/SLe/Kono/20150114
sGP Zaire ebolavirus.	AKU75286.1	913074815	364	Sierra Leone: Kono	14-Jan-2015	EBOV/DML24506/SLe/Kono/20150114
virion spike glycoprotein precursor Zaire ebolavirus.	AKU75285.1	913074814	676	Sierra Leone: Kono	14-Jan-2015	EBOV/DML24506/SLe/Kono/20150114
ssGP Zaire ebolavirus.	AKU75278.1	913074806	297	Sierra Leone: Kono	13-Jan-2015	EBOV/DML24504/SLe/Kono/20150113
sGP Zaire ebolavirus.	AKU75277.1	913074805	364	Sierra Leone: Kono	13-Jan-2015	EBOV/DML24504/SLe/Kono/20150113
virion spike glycoprotein precursor Zaire ebolavirus.	AKU75276.1	913074804	676	Sierra Leone: Kono	13-Jan-2015	EBOV/DML24504/SLe/Kono/20150113
ssGP Zaire ebolavirus.	AKU75269.1	913074796	297	Sierra Leone: Kono	13-Jan-2015	EBOV/DML24502/SLe/Kono/20150113
sGP Zaire ebolavirus.	AKU75268.1	913074795	364	Sierra Leone: Kono	13-Jan-2015	EBOV/DML24502/SLe/Kono/20150113
virion spike glycoprotein precursor Zaire ebolavirus.	AKU75267.1	913074794	676	Sierra Leone: Kono	13-Jan-2015	EBOV/DML24502/SLe/Kono/20150113
ssGP Zaire ebolavirus.	AKU75260.1	913074786	297	Sierra Leone: Western Urban	31-Mar-2015	EBOV/DML12485/SLe/WesternUrban/20150331
sGP Zaire ebolavirus.	AKU75259.1	913074785	364	Sierra Leone: Western Urban	31-Mar-2015	EBOV/DML12485/SLe/WesternUrban/20150331
virion spike glycoprotein precursor Zaire ebolavirus.	AKU75258.1	913074784	676	Sierra Leone: Western Urban	31-Mar-2015	EBOV/DML12485/SLe/WesternUrban/20150331
ssGP Zaire ebolavirus.	AKU75251.1	913074776	297	Sierra Leone: Western Urban	28-Mar-2015	EBOV/DML12458/SLe/WesternUrban/20150328
sGP Zaire ebolavirus.	AKU75250.1	913074775	364	Sierra Leone: Western Urban	28-Mar-2015	EBOV/DML12458/SLe/WesternUrban/20150328
virion spike glycoprotein precursor Zaire ebolavirus.	AKU75249.1	913074774	676	Sierra Leone: Western Urban	28-Mar-2015	EBOV/DML12458/SLe/WesternUrban/20150328
ssGP Zaire ebolavirus.	AKU75242.1	913074766	297	Sierra Leone: Western Urban	10-Mar-2015	EBOV/DML12268/SLe/WesternUrban/20150310
sGP Zaire ebolavirus.	AKU75241.1	913074765	364	Sierra Leone: Western Urban	10-Mar-2015	EBOV/DML12268/SLe/WesternUrban/20150310
virion spike glycoprotein precursor Zaire ebolavirus.	AKU75240.1	913074764	676	Sierra Leone: Western Urban	10-Mar-2015	EBOV/DML12268/SLe/WesternUrban/20150310
ssGP Zaire ebolavirus.	AKU75233.1	913074756	297	Sierra Leone: Western Urban	09-Mar-2015	EBOV/DML12260/SLe/WesternUrban/20150309
sGP Zaire ebolavirus.	AKU75232.1	913074755	364	Sierra Leone: Western Urban	09-Mar-2015	EBOV/DML12260/SLe/WesternUrban/20150309
virion spike glycoprotein precursor Zaire ebolavirus.	AKU75231.1	913074754	676	Sierra Leone: Western Urban	09-Mar-2015	EBOV/DML12260/SLe/WesternUrban/20150309
ssGP Zaire ebolavirus.	AKU75224.1	913074746	297	Sierra Leone: Western Urban	07-Mar-2015	EBOV/DML12239/SLe/WesternUrban/20150309
sGP Zaire ebolavirus.	AKU75223.1	913074745	364	Sierra Leone: Western Urban	07-Mar-2015	EBOV/DML12239/SLe/WesternUrban/20150309
virion spike glycoprotein precursor Zaire ebolavirus.	AKU75222.1	913074744	676	Sierra Leone: Western Urban	07-Mar-2015	EBOV/DML12239/SLe/WesternUrban/20150309
ssGP Zaire ebolavirus.	AKU75215.1	913074736	297	Sierra Leone: Western Urban	28-Feb-2015	EBOV/DML12137/SLe/WesternUrban/20150228
sGP Zaire ebolavirus.	AKU75214.1	913074735	364	Sierra Leone: Western Urban	28-Feb-2015	EBOV/DML12137/SLe/WesternUrban/20150228
virion spike glycoprotein precursor Zaire ebolavirus.	AKU75213.1	913074734	676	Sierra Leone: Western Urban	28-Feb-2015	EBOV/DML12137/SLe/WesternUrban/20150228
ssGP Zaire ebolavirus.	AKU75206.1	913074726	297	Sierra Leone: Western Urban	04-Mar-2015	EBOV/DML12194/SLe/WesternUrban/20150304
sGP Zaire ebolavirus.	AKU75205.1	913074725	364	Sierra Leone: Western Urban	04-Mar-2015	EBOV/DML12194/SLe/WesternUrban/20150304
virion spike glycoprotein precursor Zaire ebolavirus.	AKU75204.1	913074724	676	Sierra Leone: Western Urban	04-Mar-2015	EBOV/DML12194/SLe/WesternUrban/20150304
ssGP Zaire ebolavirus.	AKU75197.1	913074716	297	Sierra Leone: Western Urban	27-Feb-2015	EBOV/DML12120/SLe/WesternUrban/20150227
sGP Zaire ebolavirus.	AKU75196.1	913074715	364	Sierra Leone: Western Urban	27-Feb-2015	EBOV/DML12120/SLe/WesternUrban/20150227
virion spike glycoprotein precursor Zaire ebolavirus.	AKU75195.1	913074714	676	Sierra Leone: Western Urban	27-Feb-2015	EBOV/DML12120/SLe/WesternUrban/20150227
ssGP Zaire ebolavirus.	AKU75188.1	913074706	297	Sierra Leone: Western Urban	26-Feb-2015	EBOV/DML12117/SLe/WesternUrban/20150226
sGP Zaire ebolavirus.	AKU75187.1	913074705	364	Sierra Leone: Western Urban	26-Feb-2015	EBOV/DML12117/SLe/WesternUrban/20150226
virion spike glycoprotein precursor Zaire ebolavirus.	AKU75186.1	913074704	676	Sierra Leone: Western Urban	26-Feb-2015	EBOV/DML12117/SLe/WesternUrban/20150226
ssGP Zaire ebolavirus.	AKU75179.1	913074696	297	Sierra Leone: Western Urban	26-Feb-2015	EBOV/DML12116/SLe/WesternUrban/20150226
sGP Zaire ebolavirus.	AKU75178.1	913074695	364	Sierra Leone: Western Urban	26-Feb-2015	EBOV/DML12116/SLe/WesternUrban/20150226
virion spike glycoprotein precursor Zaire ebolavirus.	AKU75177.1	913074694	676	Sierra Leone: Western Urban	26-Feb-2015	EBOV/DML12116/SLe/WesternUrban/20150226
ssGP Zaire ebolavirus.	AKU75170.1	913074686	297	Sierra Leone: Western Urban	21-Feb-2015	EBOV/DML12051/SLe/WesternUrban/20150221
sGP Zaire ebolavirus.	AKU75169.1	913074685	364	Sierra Leone: Western Urban	21-Feb-2015	EBOV/DML12051/SLe/WesternUrban/20150221
virion spike glycoprotein precursor Zaire ebolavirus.	AKU75168.1	913074684	676	Sierra Leone: Western Urban	21-Feb-2015	EBOV/DML12051/SLe/WesternUrban/20150221
ssGP Zaire ebolavirus.	AKU75161.1	913074676	297	Sierra Leone: Western Urban	19-Feb-2015	EBOV/DML12033/SLe/WesternUrban/20150219
sGP Zaire ebolavirus.	AKU75160.1	913074675	364	Sierra Leone: Western Urban	19-Feb-2015	EBOV/DML12033/SLe/WesternUrban/20150219
virion spike glycoprotein precursor Zaire ebolavirus.	AKU75159.1	913074674	676	Sierra Leone: Western Urban	19-Feb-2015	EBOV/DML12033/SLe/WesternUrban/20150219
ssGP Zaire ebolavirus.	AKG65270.1	833552694	297	Guinea	15-Sep-2014	Ebola virus/H.sapiens-wt/GIN/2014/Makona-Forecariah-989
sGP Zaire ebolavirus.	AKG65269.1	833552693	364	Guinea	15-Sep-2014	Ebola virus/H.sapiens-wt/GIN/2014/Makona-Forecariah-989
GP Zaire ebolavirus.	AKG65268.1	833552692	676	Guinea	15-Sep-2014	Ebola virus/H.sapiens-wt/GIN/2014/Makona-Forecariah-989
ssGP Zaire ebolavirus.	AKG65855.1	820744101	297	Guinea	07-Oct-2014	Ebola virus/H.sapiens-wt/GIN/2014/Makona-Coyah-1327
sGP Zaire ebolavirus.	AKG65854.1	820744100	364	Guinea	07-Oct-2014	Ebola virus/H.sapiens-wt/GIN/2014/Makona-Coyah-1327
GP Zaire ebolavirus.	AKG65853.1	820744099	676	Guinea	07-Oct-2014	Ebola virus/H.sapiens-wt/GIN/2014/Makona-Coyah-1327
ssGP Zaire ebolavirus.	AKG65846.1	820744091	297	Guinea	07-Oct-2014	Ebola virus/H.sapiens-wt/GIN/2014/Makona-Coyah-1320
sGP Zaire ebolavirus.	AKG65845.1	820744090	364	Guinea	07-Oct-2014	Ebola virus/H.sapiens-wt/GIN/2014/Makona-Coyah-1320
GP Zaire ebolavirus.	AKG65844.1	820744089	676	Guinea	07-Oct-2014	Ebola virus/H.sapiens-wt/GIN/2014/Makona-Coyah-1320
ssGP Zaire ebolavirus.	AKG65837.1	820744081	297	Guinea	04-Oct-2014	Ebola virus/H.sapiens-wt/GIN/2014/Makona-Coyah-1279
sGP Zaire ebolavirus.	AKG65836.1	820744080	364	Guinea	04-Oct-2014	Ebola virus/H.sapiens-wt/GIN/2014/Makona-Coyah-1279
GP Zaire ebolavirus.	AKG65835.1	820744079	676	Guinea	04-Oct-2014	Ebola virus/H.sapiens-wt/GIN/2014/Makona-Coyah-1279
ssGP Zaire ebolavirus.	AKG65828.1	820744071	297	Guinea	27-Aug-2014	Ebola virus/H.sapiens-wt/GIN/2014/Makona-Conakry-768
sGP Zaire ebolavirus.	AKG65827.1	820744070	364	Guinea	27-Aug-2014	Ebola virus/H.sapiens-wt/GIN/2014/Makona-Conakry-768
GP Zaire ebolavirus.	AKG65826.1	820744069	676	Guinea	27-Aug-2014	Ebola virus/H.sapiens-wt/GIN/2014/Makona-Conakry-768
ssGP Zaire ebolavirus.	AKG65819.1	820744061	297	Guinea	26-Aug-2014	Ebola virus/H.sapiens-wt/GIN/2014/Makona-Conakry-742
sGP Zaire ebolavirus.	AKG65818.1	820744060	364	Guinea	26-Aug-2014	Ebola virus/H.sapiens-wt/GIN/2014/Makona-Conakry-742
GP Zaire ebolavirus.	AKG65817.1	820744059	676	Guinea	26-Aug-2014	Ebola virus/H.sapiens-wt/GIN/2014/Makona-Conakry-742
ssGP Zaire ebolavirus.	AKG65810.1	820744051	297	Guinea	24-Jul-2014	Ebola virus/H.sapiens-wt/GIN/2014/Makona-Conakry-507
sGP Zaire ebolavirus.	AKG65809.1	820744050	364	Guinea	24-Jul-2014	Ebola virus/H.sapiens-wt/GIN/2014/Makona-Conakry-507
GP Zaire ebolavirus.	AKG65808.1	820744049	676	Guinea	24-Jul-2014	Ebola virus/H.sapiens-wt/GIN/2014/Makona-Conakry-507
ssGP Zaire ebolavirus.	AKG65801.1	820744041	297	Guinea	04-Oct-2014	Ebola virus/H.sapiens-wt/GIN/2014/Makona-Conakry-1250
sGP Zaire ebolavirus.	AKG65800.1	820744040	364	Guinea	04-Oct-2014	Ebola virus/H.sapiens-wt/GIN/2014/Makona-Conakry-1250
GP Zaire ebolavirus.	AKG65799.1	820744039	676	Guinea	04-Oct-2014	Ebola virus/H.sapiens-wt/GIN/2014/Makona-Conakry-1250
ssGP Zaire ebolavirus.	AKG65792.1	820744031	297	Guinea	02-Oct-2014	Ebola virus/H.sapiens-wt/GIN/2014/Makona-Conakry-1215
sGP Zaire ebolavirus.	AKG65791.1	820744030	364	Guinea	02-Oct-2014	Ebola virus/H.sapiens-wt/GIN/2014/Makona-Conakry-1215
GP Zaire ebolavirus.	AKG65790.1	820744029	676	Guinea	02-Oct-2014	Ebola virus/H.sapiens-wt/GIN/2014/Makona-Conakry-1215
ssGP Zaire ebolavirus.	AKG65783.1	820744021	297	Guinea	02-Oct-2014	Ebola virus/H.sapiens-wt/GIN/2014/Makona-Conakry-1213
sGP Zaire ebolavirus.	AKG65782.1	820744020	364	Guinea	02-Oct-2014	Ebola virus/H.sapiens-wt/GIN/2014/Makona-Conakry-1213
GP Zaire ebolavirus.	AKG65781.1	820744019	676	Guinea	02-Oct-2014	Ebola virus/H.sapiens-wt/GIN/2014/Makona-Conakry-1213
ssGP Zaire ebolavirus.	AKG65774.1	820744011	297	Guinea	27-Sep-2014	Ebola virus/H.sapiens-wt/GIN/2014/Makona-Conakry-1149
sGP Zaire ebolavirus.	AKG65773.1	820744010	364	Guinea	27-Sep-2014	Ebola virus/H.sapiens-wt/GIN/2014/Makona-Conakry-1149
GP Zaire ebolavirus.	AKG65772.1	820744009	676	Guinea	27-Sep-2014	Ebola virus/H.sapiens-wt/GIN/2014/Makona-Conakry-1149
ssGP Zaire ebolavirus.	AKG65765.1	820744001	297	Guinea	25-Sep-2014	Ebola virus/H.sapiens-wt/GIN/2014/Makona-Conakry-1129
sGP Zaire ebolavirus.	AKG65764.1	820744000	364	Guinea	25-Sep-2014	Ebola virus/H.sapiens-wt/GIN/2014/Makona-Conakry-1129
GP Zaire ebolavirus.	AKG65763.1	820743999	676	Guinea	25-Sep-2014	Ebola virus/H.sapiens-wt/GIN/2014/Makona-Conakry-1129
ssGP Zaire ebolavirus.	AKG65756.1	820743991	297	Guinea	25-Sep-2014	Ebola virus/H.sapiens-wt/GIN/2014/Makona-Conakry-1128
sGP Zaire ebolavirus.	AKG65755.1	820743990	364	Guinea	25-Sep-2014	Ebola virus/H.sapiens-wt/GIN/2014/Makona-Conakry-1128
GP Zaire ebolavirus.	AKG65754.1	820743989	676	Guinea	25-Sep-2014	Ebola virus/H.sapiens-wt/GIN/2014/Makona-Conakry-1128
ssGP Zaire ebolavirus.	AKG65747.1	820743981	297	Guinea	24-Sep-2014	Ebola virus/H.sapiens-wt/GIN/2014/Makona-Conakry-1105
sGP Zaire ebolavirus.	AKG65746.1	820743980	364	Guinea	24-Sep-2014	Ebola virus/H.sapiens-wt/GIN/2014/Makona-Conakry-1105
GP Zaire ebolavirus.	AKG65745.1	820743979	676	Guinea	24-Sep-2014	Ebola virus/H.sapiens-wt/GIN/2014/Makona-Conakry-1105
ssGP Zaire ebolavirus.	AKG65738.1	820743971	297	Guinea	19-Sep-2014	Ebola virus/H.sapiens-wt/GIN/2014/Makona-Conakry-1039
sGP Zaire ebolavirus.	AKG65737.1	820743970	364	Guinea	19-Sep-2014	Ebola virus/H.sapiens-wt/GIN/2014/Makona-Conakry-1039
GP Zaire ebolavirus.	AKG65736.1	820743969	676	Guinea	19-Sep-2014	Ebola virus/H.sapiens-wt/GIN/2014/Makona-Conakry-1039
ssGP Zaire ebolavirus.	AKG65729.1	820743961	297	Guinea	18-Sep-2014	Ebola virus/H.sapiens-wt/GIN/2014/Makona-Conakry-1027
sGP Zaire ebolavirus.	AKG65728.1	820743960	364	Guinea	18-Sep-2014	Ebola virus/H.sapiens-wt/GIN/2014/Makona-Conakry-1027
GP Zaire ebolavirus.	AKG65727.1	820743959	676	Guinea	18-Sep-2014	Ebola virus/H.sapiens-wt/GIN/2014/Makona-Conakry-1027
ssGP Zaire ebolavirus.	AKG65720.1	820743951	297	Guinea	16-Oct-2014	Ebola virus/H.sapiens-wt/GIN/2014/Makona-Conakry-1491
sGP Zaire ebolavirus.	AKG65719.1	820743950	364	Guinea	16-Oct-2014	Ebola virus/H.sapiens-wt/GIN/2014/Makona-Conakry-1491
GP Zaire ebolavirus.	AKG65718.1	820743949	676	Guinea	16-Oct-2014	Ebola virus/H.sapiens-wt/GIN/2014/Makona-Conakry-1491
ssGP Zaire ebolavirus.	AKG65711.1	820743941	297	Guinea	15-Oct-2014	Ebola virus/H.sapiens-wt/GIN/2014/Makona-Conakry-1481
sGP Zaire ebolavirus.	AKG65710.1	820743940	364	Guinea	15-Oct-2014	Ebola virus/H.sapiens-wt/GIN/2014/Makona-Conakry-1481
GP Zaire ebolavirus.	AKG65709.1	820743939	676	Guinea	15-Oct-2014	Ebola virus/H.sapiens-wt/GIN/2014/Makona-Conakry-1481
ssGP Zaire ebolavirus.	AKG65702.1	820743931	297	Guinea	25-Oct-2014	Ebola virus/H.sapiens-wt/GIN/2014/Makona-Coyah-1690
sGP Zaire ebolavirus.	AKG65701.1	820743930	364	Guinea	25-Oct-2014	Ebola virus/H.sapiens-wt/GIN/2014/Makona-Coyah-1690
GP Zaire ebolavirus.	AKG65700.1	820743929	676	Guinea	25-Oct-2014	Ebola virus/H.sapiens-wt/GIN/2014/Makona-Coyah-1690
ssGP Zaire ebolavirus.	AKG65693.1	820743921	297	Guinea	25-Oct-2014	Ebola virus/H.sapiens-wt/GIN/2014/Makona-Coyah-1689
sGP Zaire ebolavirus.	AKG65692.1	820743920	364	Guinea	25-Oct-2014	Ebola virus/H.sapiens-wt/GIN/2014/Makona-Coyah-1689
GP Zaire ebolavirus.	AKG65691.1	820743919	676	Guinea	25-Oct-2014	Ebola virus/H.sapiens-wt/GIN/2014/Makona-Coyah-1689
ssGP Zaire ebolavirus.	AKG65684.1	820743911	297	Guinea	24-Oct-2014	Ebola virus/H.sapiens-wt/GIN/2014/Makona-Coyah-1686
sGP Zaire ebolavirus.	AKG65683.1	820743910	364	Guinea	24-Oct-2014	Ebola virus/H.sapiens-wt/GIN/2014/Makona-Coyah-1686
GP Zaire ebolavirus.	AKG65682.1	820743909	676	Guinea	24-Oct-2014	Ebola virus/H.sapiens-wt/GIN/2014/Makona-Coyah-1686
ssGP Zaire ebolavirus.	AKG65675.1	820743901	297	Guinea	24-Oct-2014	Ebola virus/H.sapiens-wt/GIN/2014/Makona-Coyah-1652
sGP Zaire ebolavirus.	AKG65674.1	820743900	364	Guinea	24-Oct-2014	Ebola virus/H.sapiens-wt/GIN/2014/Makona-Coyah-1652
GP Zaire ebolavirus.	AKG65673.1	820743899	676	Guinea	24-Oct-2014	Ebola virus/H.sapiens-wt/GIN/2014/Makona-Coyah-1652
ssGP Zaire ebolavirus.	AKG65666.1	820743891	297	Guinea	24-Oct-2014	Ebola virus/H.sapiens-wt/GIN/2014/Makona-Conakry-1651
sGP Zaire ebolavirus.	AKG65665.1	820743890	364	Guinea	24-Oct-2014	Ebola virus/H.sapiens-wt/GIN/2014/Makona-Conakry-1651
GP Zaire ebolavirus.	AKG65664.1	820743889	676	Guinea	24-Oct-2014	Ebola virus/H.sapiens-wt/GIN/2014/Makona-Conakry-1651
ssGP Zaire ebolavirus.	AKG65657.1	820743881	297	Guinea	23-Oct-2014	Ebola virus/H.sapiens-wt/GIN/2014/Makona-Kindia-1648
sGP Zaire ebolavirus.	AKG65656.1	820743880	364	Guinea	23-Oct-2014	Ebola virus/H.sapiens-wt/GIN/2014/Makona-Kindia-1648
GP Zaire ebolavirus.	AKG65655.1	820743879	676	Guinea	23-Oct-2014	Ebola virus/H.sapiens-wt/GIN/2014/Makona-Kindia-1648
ssGP Zaire ebolavirus.	AKG65648.1	820743871	297	Guinea	24-Oct-2014	Ebola virus/H.sapiens-wt/GIN/2014/Makona-Forecariah-1623
sGP Zaire ebolavirus.	AKG65647.1	820743870	364	Guinea	24-Oct-2014	Ebola virus/H.sapiens-wt/GIN/2014/Makona-Forecariah-1623
GP Zaire ebolavirus.	AKG65646.1	820743869	676	Guinea	24-Oct-2014	Ebola virus/H.sapiens-wt/GIN/2014/Makona-Forecariah-1623
ssGP Zaire ebolavirus.	AKG65639.1	820743861	297	Guinea	22-Oct-2014	Ebola virus/H.sapiens-wt/GIN/2014/Makona-Nzeerekore-1622
sGP Zaire ebolavirus.	AKG65638.1	820743860	364	Guinea	22-Oct-2014	Ebola virus/H.sapiens-wt/GIN/2014/Makona-Nzeerekore-1622
GP Zaire ebolavirus.	AKG65637.1	820743859	676	Guinea	22-Oct-2014	Ebola virus/H.sapiens-wt/GIN/2014/Makona-Nzeerekore-1622
ssGP Zaire ebolavirus.	AKG65630.1	820743851	297	Guinea	20-Oct-2014	Ebola virus/H.sapiens-wt/GIN/2014/Makona-Forecariah-1571
sGP Zaire ebolavirus.	AKG65629.1	820743850	364	Guinea	20-Oct-2014	Ebola virus/H.sapiens-wt/GIN/2014/Makona-Forecariah-1571
GP Zaire ebolavirus.	AKG65628.1	820743849	676	Guinea	20-Oct-2014	Ebola virus/H.sapiens-wt/GIN/2014/Makona-Forecariah-1571
ssGP Zaire ebolavirus.	AKG65621.1	820743841	297	Guinea	18-Oct-2014	Ebola virus/H.sapiens-wt/GIN/2014/Makona-Forecariah-1568
sGP Zaire ebolavirus.	AKG65620.1	820743840	364	Guinea	18-Oct-2014	Ebola virus/H.sapiens-wt/GIN/2014/Makona-Forecariah-1568
GP Zaire ebolavirus.	AKG65619.1	820743839	676	Guinea	18-Oct-2014	Ebola virus/H.sapiens-wt/GIN/2014/Makona-Forecariah-1568
ssGP Zaire ebolavirus.	AKG65612.1	820743831	297	Guinea	18-Oct-2014	Ebola virus/H.sapiens-wt/GIN/2014/Makona-Forecariah-1567
sGP Zaire ebolavirus.	AKG65611.1	820743830	364	Guinea	18-Oct-2014	Ebola virus/H.sapiens-wt/GIN/2014/Makona-Forecariah-1567
GP Zaire ebolavirus.	AKG65610.1	820743829	676	Guinea	18-Oct-2014	Ebola virus/H.sapiens-wt/GIN/2014/Makona-Forecariah-1567
ssGP Zaire ebolavirus.	AKG65603.1	820743821	297	Guinea	19-Oct-2014	Ebola virus/H.sapiens-wt/GIN/2014/Makona-Conakry-1561
sGP Zaire ebolavirus.	AKG65602.1	820743820	364	Guinea	19-Oct-2014	Ebola virus/H.sapiens-wt/GIN/2014/Makona-Conakry-1561
GP Zaire ebolavirus.	AKG65601.1	820743819	676	Guinea	19-Oct-2014	Ebola virus/H.sapiens-wt/GIN/2014/Makona-Conakry-1561
ssGP Zaire ebolavirus.	AKG65594.1	820743811	297	Guinea	18-Oct-2014	Ebola virus/H.sapiens-wt/GIN/2014/Makona-Conakry-1551
sGP Zaire ebolavirus.	AKG65593.1	820743810	364	Guinea	18-Oct-2014	Ebola virus/H.sapiens-wt/GIN/2014/Makona-Conakry-1551
GP Zaire ebolavirus.	AKG65592.1	820743809	676	Guinea	18-Oct-2014	Ebola virus/H.sapiens-wt/GIN/2014/Makona-Conakry-1551
ssGP Zaire ebolavirus.	AKG65585.1	820743801	297	Guinea	15-Oct-2014	Ebola virus/H.sapiens-wt/GIN/2014/Makona-Conakry-1480
sGP Zaire ebolavirus.	AKG65584.1	820743800	364	Guinea	15-Oct-2014	Ebola virus/H.sapiens-wt/GIN/2014/Makona-Conakry-1480
GP Zaire ebolavirus.	AKG65583.1	820743799	676	Guinea	15-Oct-2014	Ebola virus/H.sapiens-wt/GIN/2014/Makona-Conakry-1480
ssGP Zaire ebolavirus.	AKG65576.1	820743791	297	Guinea	14-Oct-2014	Ebola virus/H.sapiens-wt/GIN/2014/Makona-Conakry-1454
sGP Zaire ebolavirus.	AKG65575.1	820743790	364	Guinea	14-Oct-2014	Ebola virus/H.sapiens-wt/GIN/2014/Makona-Conakry-1454
GP Zaire ebolavirus.	AKG65574.1	820743789	676	Guinea	14-Oct-2014	Ebola virus/H.sapiens-wt/GIN/2014/Makona-Conakry-1454
ssGP Zaire ebolavirus.	AKG65567.1	820743781	297	Guinea	14-Oct-2014	Ebola virus/H.sapiens-wt/GIN/2014/Makona-Conakry-1445
sGP Zaire ebolavirus.	AKG65566.1	820743780	364	Guinea	14-Oct-2014	Ebola virus/H.sapiens-wt/GIN/2014/Makona-Conakry-1445
GP Zaire ebolavirus.	AKG65565.1	820743779	676	Guinea	14-Oct-2014	Ebola virus/H.sapiens-wt/GIN/2014/Makona-Conakry-1445
ssGP Zaire ebolavirus.	AKG65558.1	820743771	297	Guinea	13-Oct-2014	Ebola virus/H.sapiens-wt/GIN/2014/Makona-Coyah-1436
sGP Zaire ebolavirus.	AKG65557.1	820743770	364	Guinea	13-Oct-2014	Ebola virus/H.sapiens-wt/GIN/2014/Makona-Coyah-1436
GP Zaire ebolavirus.	AKG65556.1	820743769	676	Guinea	13-Oct-2014	Ebola virus/H.sapiens-wt/GIN/2014/Makona-Coyah-1436
ssGP Zaire ebolavirus.	AKG65549.1	820743761	297	Guinea	11-Oct-2014	Ebola virus/H.sapiens-wt/GIN/2014/Makona-Coyah-1394
sGP Zaire ebolavirus.	AKG65548.1	820743760	364	Guinea	11-Oct-2014	Ebola virus/H.sapiens-wt/GIN/2014/Makona-Coyah-1394
GP Zaire ebolavirus.	AKG65547.1	820743759	676	Guinea	11-Oct-2014	Ebola virus/H.sapiens-wt/GIN/2014/Makona-Coyah-1394
ssGP Zaire ebolavirus.	AKG65540.1	820743751	297	Guinea	10-Oct-2014	Ebola virus/H.sapiens-wt/GIN/2014/Makona-Coyah-1374
sGP Zaire ebolavirus.	AKG65539.1	820743750	364	Guinea	10-Oct-2014	Ebola virus/H.sapiens-wt/GIN/2014/Makona-Coyah-1374
GP Zaire ebolavirus.	AKG65538.1	820743749	676	Guinea	10-Oct-2014	Ebola virus/H.sapiens-wt/GIN/2014/Makona-Coyah-1374
ssGP Zaire ebolavirus.	AKG65531.1	820743741	297	Guinea	10-Oct-2014	Ebola virus/H.sapiens-wt/GIN/2014/Makona-Conakry-1371
sGP Zaire ebolavirus.	AKG65530.1	820743740	364	Guinea	10-Oct-2014	Ebola virus/H.sapiens-wt/GIN/2014/Makona-Conakry-1371
GP Zaire ebolavirus.	AKG65529.1	820743739	676	Guinea	10-Oct-2014	Ebola virus/H.sapiens-wt/GIN/2014/Makona-Conakry-1371
ssGP Zaire ebolavirus.	AKG65522.1	820743731	297	Guinea	09-Oct-2014	Ebola virus/H.sapiens-wt/GIN/2014/Makona-Forecariah-1365
sGP Zaire ebolavirus.	AKG65521.1	820743730	364	Guinea	09-Oct-2014	Ebola virus/H.sapiens-wt/GIN/2014/Makona-Forecariah-1365
GP Zaire ebolavirus.	AKG65520.1	820743729	676	Guinea	09-Oct-2014	Ebola virus/H.sapiens-wt/GIN/2014/Makona-Forecariah-1365
ssGP Zaire ebolavirus.	AKG65513.1	820743721	297	Guinea	09-Oct-2014	Ebola virus/H.sapiens-wt/GIN/2014/Makona-Coyah-1355
sGP Zaire ebolavirus.	AKG65512.1	820743720	364	Guinea	09-Oct-2014	Ebola virus/H.sapiens-wt/GIN/2014/Makona-Coyah-1355
GP Zaire ebolavirus.	AKG65511.1	820743719	676	Guinea	09-Oct-2014	Ebola virus/H.sapiens-wt/GIN/2014/Makona-Coyah-1355
ssGP Zaire ebolavirus.	AKG65504.1	820743711	297	Guinea	08-Oct-2014	Ebola virus/H.sapiens-wt/GIN/2014/Makona-Conakry-1342
sGP Zaire ebolavirus.	AKG65503.1	820743710	364	Guinea	08-Oct-2014	Ebola virus/H.sapiens-wt/GIN/2014/Makona-Conakry-1342
GP Zaire ebolavirus.	AKG65502.1	820743709	676	Guinea	08-Oct-2014	Ebola virus/H.sapiens-wt/GIN/2014/Makona-Conakry-1342
ssGP Zaire ebolavirus.	AKG65495.1	820743701	297	Guinea	08-Oct-2014	Ebola virus/H.sapiens-wt/GIN/2014/Makona-Conakry-1340
sGP Zaire ebolavirus.	AKG65494.1	820743700	364	Guinea	08-Oct-2014	Ebola virus/H.sapiens-wt/GIN/2014/Makona-Conakry-1340
GP Zaire ebolavirus.	AKG65493.1	820743699	676	Guinea	08-Oct-2014	Ebola virus/H.sapiens-wt/GIN/2014/Makona-Conakry-1340
ssGP Zaire ebolavirus.	AKG65486.1	820743691	297	Guinea	08-Oct-2014	Ebola virus/H.sapiens-wt/GIN/2014/Makona-Coyah-1339
sGP Zaire ebolavirus.	AKG65485.1	820743690	364	Guinea	08-Oct-2014	Ebola virus/H.sapiens-wt/GIN/2014/Makona-Coyah-1339
GP Zaire ebolavirus.	AKG65484.1	820743689	676	Guinea	08-Oct-2014	Ebola virus/H.sapiens-wt/GIN/2014/Makona-Coyah-1339
ssGP Zaire ebolavirus.	AKG65477.1	820743681	297	Guinea	07-Oct-2014	Ebola virus/H.sapiens-wt/GIN/2014/Makona-Coyah-1333
sGP Zaire ebolavirus.	AKG65476.1	820743680	364	Guinea	07-Oct-2014	Ebola virus/H.sapiens-wt/GIN/2014/Makona-Coyah-1333
GP Zaire ebolavirus.	AKG65475.1	820743679	676	Guinea	07-Oct-2014	Ebola virus/H.sapiens-wt/GIN/2014/Makona-Coyah-1333
ssGP Zaire ebolavirus.	AKG65468.1	820743671	297	Guinea	07-Oct-2014	Ebola virus/H.sapiens-wt/GIN/2014/Makona-Kerouane-1331
sGP Zaire ebolavirus.	AKG65467.1	820743670	364	Guinea	07-Oct-2014	Ebola virus/H.sapiens-wt/GIN/2014/Makona-Kerouane-1331
GP Zaire ebolavirus.	AKG65466.1	820743669	676	Guinea	07-Oct-2014	Ebola virus/H.sapiens-wt/GIN/2014/Makona-Kerouane-1331
ssGP Zaire ebolavirus.	AKG65459.1	820743661	297	Guinea	07-Oct-2014	Ebola virus/H.sapiens-wt/GIN/2014/Makona-Coyah-1321
sGP Zaire ebolavirus.	AKG65458.1	820743660	364	Guinea	07-Oct-2014	Ebola virus/H.sapiens-wt/GIN/2014/Makona-Coyah-1321
GP Zaire ebolavirus.	AKG65457.1	820743659	676	Guinea	07-Oct-2014	Ebola virus/H.sapiens-wt/GIN/2014/Makona-Coyah-1321
ssGP Zaire ebolavirus.	AKG65450.1	820743651	297	Guinea	07-Oct-2014	Ebola virus/H.sapiens-wt/GIN/2014/Makona-Coyah-1316
sGP Zaire ebolavirus.	AKG65449.1	820743650	364	Guinea	07-Oct-2014	Ebola virus/H.sapiens-wt/GIN/2014/Makona-Coyah-1316
GP Zaire ebolavirus.	AKG65448.1	820743649	676	Guinea	07-Oct-2014	Ebola virus/H.sapiens-wt/GIN/2014/Makona-Coyah-1316
ssGP Zaire ebolavirus.	AKG65441.1	820743641	297	Guinea	06-Oct-2014	Ebola virus/H.sapiens-wt/GIN/2014/Makona-Conakry-1298
sGP Zaire ebolavirus.	AKG65440.1	820743640	364	Guinea	06-Oct-2014	Ebola virus/H.sapiens-wt/GIN/2014/Makona-Conakry-1298
GP Zaire ebolavirus.	AKG65439.1	820743639	676	Guinea	06-Oct-2014	Ebola virus/H.sapiens-wt/GIN/2014/Makona-Conakry-1298
ssGP Zaire ebolavirus.	AKG65432.1	820743631	297	Guinea	04-Oct-2014	Ebola virus/H.sapiens-wt/GIN/2014/Makona-Coyah-1278
sGP Zaire ebolavirus.	AKG65431.1	820743630	364	Guinea	04-Oct-2014	Ebola virus/H.sapiens-wt/GIN/2014/Makona-Coyah-1278
GP Zaire ebolavirus.	AKG65430.1	820743629	676	Guinea	04-Oct-2014	Ebola virus/H.sapiens-wt/GIN/2014/Makona-Coyah-1278
ssGP Zaire ebolavirus.	AKG65423.1	820743621	297	Guinea	04-Oct-2014	Ebola virus/H.sapiens-wt/GIN/2014/Makona-Coyah-1277
sGP Zaire ebolavirus.	AKG65422.1	820743620	364	Guinea	04-Oct-2014	Ebola virus/H.sapiens-wt/GIN/2014/Makona-Coyah-1277
GP Zaire ebolavirus.	AKG65421.1	820743619	676	Guinea	04-Oct-2014	Ebola virus/H.sapiens-wt/GIN/2014/Makona-Coyah-1277
ssGP Zaire ebolavirus.	AKG65414.1	820743611	297	Guinea	04-Oct-2014	Ebola virus/H.sapiens-wt/GIN/2014/Makona-Coyah-1274
sGP Zaire ebolavirus.	AKG65413.1	820743610	364	Guinea	04-Oct-2014	Ebola virus/H.sapiens-wt/GIN/2014/Makona-Coyah-1274
GP Zaire ebolavirus.	AKG65412.1	820743609	676	Guinea	04-Oct-2014	Ebola virus/H.sapiens-wt/GIN/2014/Makona-Coyah-1274
ssGP Zaire ebolavirus.	AKG65405.1	820743601	297	Guinea	04-Oct-2014	Ebola virus/H.sapiens-wt/GIN/2014/Makona-Conakry-1249
sGP Zaire ebolavirus.	AKG65404.1	820743600	364	Guinea	04-Oct-2014	Ebola virus/H.sapiens-wt/GIN/2014/Makona-Conakry-1249
GP Zaire ebolavirus.	AKG65403.1	820743599	676	Guinea	04-Oct-2014	Ebola virus/H.sapiens-wt/GIN/2014/Makona-Conakry-1249
ssGP Zaire ebolavirus.	AKG65396.1	820743591	297	Guinea	02-Oct-2014	Ebola virus/H.sapiens-wt/GIN/2014/Makona-Dalaba-1211
sGP Zaire ebolavirus.	AKG65395.1	820743590	364	Guinea	02-Oct-2014	Ebola virus/H.sapiens-wt/GIN/2014/Makona-Dalaba-1211
GP Zaire ebolavirus.	AKG65394.1	820743589	676	Guinea	02-Oct-2014	Ebola virus/H.sapiens-wt/GIN/2014/Makona-Dalaba-1211
ssGP Zaire ebolavirus.	AKG65387.1	820743581	297	Guinea	02-Oct-2014	Ebola virus/H.sapiens-wt/GIN/2014/Makona-Conakry-1210
sGP Zaire ebolavirus.	AKG65386.1	820743580	364	Guinea	02-Oct-2014	Ebola virus/H.sapiens-wt/GIN/2014/Makona-Conakry-1210
GP Zaire ebolavirus.	AKG65385.1	820743579	676	Guinea	02-Oct-2014	Ebola virus/H.sapiens-wt/GIN/2014/Makona-Conakry-1210
ssGP Zaire ebolavirus.	AKG65378.1	820743571	297	Guinea	02-Oct-2014	Ebola virus/H.sapiens-wt/GIN/2014/Makona-Conakry-1205
sGP Zaire ebolavirus.	AKG65377.1	820743570	364	Guinea	02-Oct-2014	Ebola virus/H.sapiens-wt/GIN/2014/Makona-Conakry-1205
GP Zaire ebolavirus.	AKG65376.1	820743569	676	Guinea	02-Oct-2014	Ebola virus/H.sapiens-wt/GIN/2014/Makona-Conakry-1205
ssGP Zaire ebolavirus.	AKG65369.1	820743561	297	Guinea	28-Sep-2014	Ebola virus/H.sapiens-wt/GIN/2014/Makona-Conakry-1193
sGP Zaire ebolavirus.	AKG65368.1	820743560	364	Guinea	28-Sep-2014	Ebola virus/H.sapiens-wt/GIN/2014/Makona-Conakry-1193
GP Zaire ebolavirus.	AKG65367.1	820743559	676	Guinea	28-Sep-2014	Ebola virus/H.sapiens-wt/GIN/2014/Makona-Conakry-1193
ssGP Zaire ebolavirus.	AKG65360.1	820743551	297	Guinea	25-Sep-2014	Ebola virus/H.sapiens-wt/GIN/2014/Makona-Conakry-1121
sGP Zaire ebolavirus.	AKG65359.1	820743550	364	Guinea	25-Sep-2014	Ebola virus/H.sapiens-wt/GIN/2014/Makona-Conakry-1121
GP Zaire ebolavirus.	AKG65358.1	820743549	676	Guinea	25-Sep-2014	Ebola virus/H.sapiens-wt/GIN/2014/Makona-Conakry-1121
ssGP Zaire ebolavirus.	AKG65351.1	820743541	297	Guinea	25-Sep-2014	Ebola virus/H.sapiens-wt/GIN/2014/Makona-Conakry-1120
sGP Zaire ebolavirus.	AKG65350.1	820743540	364	Guinea	25-Sep-2014	Ebola virus/H.sapiens-wt/GIN/2014/Makona-Conakry-1120
GP Zaire ebolavirus.	AKG65349.1	820743539	676	Guinea	25-Sep-2014	Ebola virus/H.sapiens-wt/GIN/2014/Makona-Conakry-1120
ssGP Zaire ebolavirus.	AKG65342.1	820743531	297	Guinea	24-Sep-2014	Ebola virus/H.sapiens-wt/GIN/2014/Makona-Dalaba-1116
sGP Zaire ebolavirus.	AKG65341.1	820743530	364	Guinea	24-Sep-2014	Ebola virus/H.sapiens-wt/GIN/2014/Makona-Dalaba-1116
GP Zaire ebolavirus.	AKG65340.1	820743529	676	Guinea	24-Sep-2014	Ebola virus/H.sapiens-wt/GIN/2014/Makona-Dalaba-1116
ssGP Zaire ebolavirus.	AKG65333.1	820743521	297	Guinea	24-Sep-2014	Ebola virus/H.sapiens-wt/GIN/2014/Makona-Dalaba-1104
sGP Zaire ebolavirus.	AKG65332.1	820743520	364	Guinea	24-Sep-2014	Ebola virus/H.sapiens-wt/GIN/2014/Makona-Dalaba-1104
GP Zaire ebolavirus.	AKG65331.1	820743519	676	Guinea	24-Sep-2014	Ebola virus/H.sapiens-wt/GIN/2014/Makona-Dalaba-1104
ssGP Zaire ebolavirus.	AKG65324.1	820743511	297	Guinea	22-Sep-2014	Ebola virus/H.sapiens-wt/GIN/2014/Makona-Conakry-1081
sGP Zaire ebolavirus.	AKG65323.1	820743510	364	Guinea	22-Sep-2014	Ebola virus/H.sapiens-wt/GIN/2014/Makona-Conakry-1081
GP Zaire ebolavirus.	AKG65322.1	820743509	676	Guinea	22-Sep-2014	Ebola virus/H.sapiens-wt/GIN/2014/Makona-Conakry-1081
ssGP Zaire ebolavirus.	AKG65315.1	820743501	297	Guinea	21-Sep-2014	Ebola virus/H.sapiens-wt/GIN/2014/Makona-Forecariah-1069
sGP Zaire ebolavirus.	AKG65314.1	820743500	364	Guinea	21-Sep-2014	Ebola virus/H.sapiens-wt/GIN/2014/Makona-Forecariah-1069
GP Zaire ebolavirus.	AKG65313.1	820743499	676	Guinea	21-Sep-2014	Ebola virus/H.sapiens-wt/GIN/2014/Makona-Forecariah-1069
ssGP Zaire ebolavirus.	AKG65306.1	820743491	297	Guinea	21-Sep-2014	Ebola virus/H.sapiens-wt/GIN/2014/Makona-Coyah-1063
sGP Zaire ebolavirus.	AKG65305.1	820743490	364	Guinea	21-Sep-2014	Ebola virus/H.sapiens-wt/GIN/2014/Makona-Coyah-1063
GP Zaire ebolavirus.	AKG65304.1	820743489	676	Guinea	21-Sep-2014	Ebola virus/H.sapiens-wt/GIN/2014/Makona-Coyah-1063
ssGP Zaire ebolavirus.	AKG65297.1	820743481	297	Guinea	21-Sep-2014	Ebola virus/H.sapiens-wt/GIN/2014/Makona-Conakry-1059
sGP Zaire ebolavirus.	AKG65296.1	820743480	364	Guinea	21-Sep-2014	Ebola virus/H.sapiens-wt/GIN/2014/Makona-Conakry-1059
GP Zaire ebolavirus.	AKG65295.1	820743479	676	Guinea	21-Sep-2014	Ebola virus/H.sapiens-wt/GIN/2014/Makona-Conakry-1059
ssGP Zaire ebolavirus.	AKG65288.1	820743471	297	Guinea	20-Sep-2014	Ebola virus/H.sapiens-wt/GIN/2014/Makona-Kindia-1047
sGP Zaire ebolavirus.	AKG65287.1	820743470	364	Guinea	20-Sep-2014	Ebola virus/H.sapiens-wt/GIN/2014/Makona-Kindia-1047
GP Zaire ebolavirus.	AKG65286.1	820743469	676	Guinea	20-Sep-2014	Ebola virus/H.sapiens-wt/GIN/2014/Makona-Kindia-1047
ssGP Zaire ebolavirus.	AKG65279.1	820743461	297	Guinea	19-Sep-2014	Ebola virus/H.sapiens-wt/GIN/2014/Makona-Conakry-1043
sGP Zaire ebolavirus.	AKG65278.1	820743460	364	Guinea	19-Sep-2014	Ebola virus/H.sapiens-wt/GIN/2014/Makona-Conakry-1043
GP Zaire ebolavirus.	AKG65277.1	820743459	676	Guinea	19-Sep-2014	Ebola virus/H.sapiens-wt/GIN/2014/Makona-Conakry-1043
ssGP Zaire ebolavirus.	AKG65261.1	820743441	297	Guinea	14-Sep-2014	Ebola virus/H.sapiens-wt/GIN/2014/Makona-Conakry-976
sGP Zaire ebolavirus.	AKG65260.1	820743440	364	Guinea	14-Sep-2014	Ebola virus/H.sapiens-wt/GIN/2014/Makona-Conakry-976
GP Zaire ebolavirus.	AKG65259.1	820743439	676	Guinea	14-Sep-2014	Ebola virus/H.sapiens-wt/GIN/2014/Makona-Conakry-976
ssGP Zaire ebolavirus.	AKG65252.1	820743431	297	Guinea	11-Sep-2014	Ebola virus/H.sapiens-wt/GIN/2014/Makona-Coyah-955
sGP Zaire ebolavirus.	AKG65251.1	820743430	364	Guinea	11-Sep-2014	Ebola virus/H.sapiens-wt/GIN/2014/Makona-Coyah-955
GP Zaire ebolavirus.	AKG65250.1	820743429	676	Guinea	11-Sep-2014	Ebola virus/H.sapiens-wt/GIN/2014/Makona-Coyah-955
ssGP Zaire ebolavirus.	AKG65243.1	820743421	297	Guinea	29-Aug-2014	Ebola virus/H.sapiens-wt/GIN/2014/Makona-Dubreka-789
sGP Zaire ebolavirus.	AKG65242.1	820743420	364	Guinea	29-Aug-2014	Ebola virus/H.sapiens-wt/GIN/2014/Makona-Dubreka-789
GP Zaire ebolavirus.	AKG65241.1	820743419	676	Guinea	29-Aug-2014	Ebola virus/H.sapiens-wt/GIN/2014/Makona-Dubreka-789
ssGP Zaire ebolavirus.	AKG65234.1	820743411	297	Guinea	28-Aug-2014	Ebola virus/H.sapiens-wt/GIN/2014/Makona-Conakry-787
sGP Zaire ebolavirus.	AKG65233.1	820743410	364	Guinea	28-Aug-2014	Ebola virus/H.sapiens-wt/GIN/2014/Makona-Conakry-787
GP Zaire ebolavirus.	AKG65232.1	820743409	676	Guinea	28-Aug-2014	Ebola virus/H.sapiens-wt/GIN/2014/Makona-Conakry-787
ssGP Zaire ebolavirus.	AKG65225.1	820743401	297	Guinea	28-Aug-2014	Ebola virus/H.sapiens-wt/GIN/2014/Makona-Conakry-786
sGP Zaire ebolavirus.	AKG65224.1	820743400	364	Guinea	28-Aug-2014	Ebola virus/H.sapiens-wt/GIN/2014/Makona-Conakry-786
GP Zaire ebolavirus.	AKG65223.1	820743399	676	Guinea	28-Aug-2014	Ebola virus/H.sapiens-wt/GIN/2014/Makona-Conakry-786
ssGP Zaire ebolavirus.	AKG65216.1	820743391	297	Guinea	26-Aug-2014	Ebola virus/H.sapiens-wt/GIN/2014/Makona-Conakry-740
sGP Zaire ebolavirus.	AKG65215.1	820743390	364	Guinea	26-Aug-2014	Ebola virus/H.sapiens-wt/GIN/2014/Makona-Conakry-740
GP Zaire ebolavirus.	AKG65214.1	820743389	676	Guinea	26-Aug-2014	Ebola virus/H.sapiens-wt/GIN/2014/Makona-Conakry-740
ssGP Zaire ebolavirus.	AKG65207.1	820743381	297	Guinea	22-Aug-2014	Ebola virus/H.sapiens-wt/GIN/2014/Makona-Conakry-701
sGP Zaire ebolavirus.	AKG65206.1	820743380	364	Guinea	22-Aug-2014	Ebola virus/H.sapiens-wt/GIN/2014/Makona-Conakry-701
GP Zaire ebolavirus.	AKG65205.1	820743379	676	Guinea	22-Aug-2014	Ebola virus/H.sapiens-wt/GIN/2014/Makona-Conakry-701
ssGP Zaire ebolavirus.	AKG65198.1	820743371	297	Guinea	21-Aug-2014	Ebola virus/H.sapiens-wt/GIN/2014/Makona-Conakry-691
sGP Zaire ebolavirus.	AKG65197.1	820743370	364	Guinea	21-Aug-2014	Ebola virus/H.sapiens-wt/GIN/2014/Makona-Conakry-691
GP Zaire ebolavirus.	AKG65196.1	820743369	676	Guinea	21-Aug-2014	Ebola virus/H.sapiens-wt/GIN/2014/Makona-Conakry-691
ssGP Zaire ebolavirus.	AKG65189.1	820743361	297	Guinea	20-Aug-2014	Ebola virus/H.sapiens-wt/GIN/2014/Makona-Conakry-684
sGP Zaire ebolavirus.	AKG65188.1	820743360	364	Guinea	20-Aug-2014	Ebola virus/H.sapiens-wt/GIN/2014/Makona-Conakry-684
GP Zaire ebolavirus.	AKG65187.1	820743359	676	Guinea	20-Aug-2014	Ebola virus/H.sapiens-wt/GIN/2014/Makona-Conakry-684
ssGP Zaire ebolavirus.	AKG65180.1	820743351	297	Guinea	19-Aug-2014	Ebola virus/H.sapiens-wt/GIN/2014/Makona-Conakry-678
sGP Zaire ebolavirus.	AKG65179.1	820743350	364	Guinea	19-Aug-2014	Ebola virus/H.sapiens-wt/GIN/2014/Makona-Conakry-678
GP Zaire ebolavirus.	AKG65178.1	820743349	676	Guinea	19-Aug-2014	Ebola virus/H.sapiens-wt/GIN/2014/Makona-Conakry-678
ssGP Zaire ebolavirus.	AKG65171.1	820743341	297	Guinea	16-Aug-2014	Ebola virus/H.sapiens-wt/GIN/2014/Makona-Conakry-657
sGP Zaire ebolavirus.	AKG65170.1	820743340	364	Guinea	16-Aug-2014	Ebola virus/H.sapiens-wt/GIN/2014/Makona-Conakry-657
GP Zaire ebolavirus.	AKG65169.1	820743339	676	Guinea	16-Aug-2014	Ebola virus/H.sapiens-wt/GIN/2014/Makona-Conakry-657
ssGP Zaire ebolavirus.	AKG65162.1	820743331	297	Guinea	15-Aug-2014	Ebola virus/H.sapiens-wt/GIN/2014/Makona-Conakry-653
sGP Zaire ebolavirus.	AKG65161.1	820743330	364	Guinea	15-Aug-2014	Ebola virus/H.sapiens-wt/GIN/2014/Makona-Conakry-653
GP Zaire ebolavirus.	AKG65160.1	820743329	676	Guinea	15-Aug-2014	Ebola virus/H.sapiens-wt/GIN/2014/Makona-Conakry-653
ssGP Zaire ebolavirus.	AKG65153.1	820743321	297	Guinea	14-Aug-2014	Ebola virus/H.sapiens-wt/GIN/2014/Makona-Macenta-645
sGP Zaire ebolavirus.	AKG65152.1	820743320	364	Guinea	14-Aug-2014	Ebola virus/H.sapiens-wt/GIN/2014/Makona-Macenta-645
GP Zaire ebolavirus.	AKG65151.1	820743319	676	Guinea	14-Aug-2014	Ebola virus/H.sapiens-wt/GIN/2014/Makona-Macenta-645
ssGP Zaire ebolavirus.	AKG65144.1	820743311	297	Guinea	12-Aug-2014	Ebola virus/H.sapiens-wt/GIN/2014/Makona-Gueckedou-633
sGP Zaire ebolavirus.	AKG65143.1	820743310	364	Guinea	12-Aug-2014	Ebola virus/H.sapiens-wt/GIN/2014/Makona-Gueckedou-633
GP Zaire ebolavirus.	AKG65142.1	820743309	676	Guinea	12-Aug-2014	Ebola virus/H.sapiens-wt/GIN/2014/Makona-Gueckedou-633
ssGP Zaire ebolavirus.	AKG65135.1	820743301	297	Guinea	02-Aug-2014	Ebola virus/H.sapiens-wt/GIN/2014/Makona-Conakry-573
sGP Zaire ebolavirus.	AKG65134.1	820743300	364	Guinea	02-Aug-2014	Ebola virus/H.sapiens-wt/GIN/2014/Makona-Conakry-573
GP Zaire ebolavirus.	AKG65133.1	820743299	676	Guinea	02-Aug-2014	Ebola virus/H.sapiens-wt/GIN/2014/Makona-Conakry-573
ssGP Zaire ebolavirus.	AKG65126.1	820743291	297	Guinea	27-Jul-2014	Ebola virus/H.sapiens-wt/GIN/2014/Makona-Kouroussa-531
sGP Zaire ebolavirus.	AKG65125.1	820743290	364	Guinea	27-Jul-2014	Ebola virus/H.sapiens-wt/GIN/2014/Makona-Kouroussa-531
GP Zaire ebolavirus.	AKG65124.1	820743289	676	Guinea	27-Jul-2014	Ebola virus/H.sapiens-wt/GIN/2014/Makona-Kouroussa-531
ssGP Zaire ebolavirus.	AKG65117.1	820743281	297	Guinea	24-Jul-2014	Ebola virus/H.sapiens-wt/GIN/2014/Makona-Siguiri-517
sGP Zaire ebolavirus.	AKG65116.1	820743280	364	Guinea	24-Jul-2014	Ebola virus/H.sapiens-wt/GIN/2014/Makona-Siguiri-517
GP Zaire ebolavirus.	AKG65115.1	820743279	676	Guinea	24-Jul-2014	Ebola virus/H.sapiens-wt/GIN/2014/Makona-Siguiri-517
ssGP Zaire ebolavirus.	AKG65108.1	820743271	297	Guinea	24-Jul-2014	Ebola virus/H.sapiens-wt/GIN/2014/Makona-Conakry-509
sGP Zaire ebolavirus.	AKG65107.1	820743270	364	Guinea	24-Jul-2014	Ebola virus/H.sapiens-wt/GIN/2014/Makona-Conakry-509
GP Zaire ebolavirus.	AKG65106.1	820743269	676	Guinea	24-Jul-2014	Ebola virus/H.sapiens-wt/GIN/2014/Makona-Conakry-509
ssGP Zaire ebolavirus.	AKG65099.1	820743261	297	Guinea	24-Jul-2014	Ebola virus/H.sapiens-wt/GIN/2014/Makona-Conakry-505
GP Zaire ebolavirus.	AKG65098.1	820743260	676	Guinea	24-Jul-2014	Ebola virus/H.sapiens-wt/GIN/2014/Makona-Conakry-505
sGP Zaire ebolavirus.	AKG65097.1	820743259	364	Guinea	24-Jul-2014	Ebola virus/H.sapiens-wt/GIN/2014/Makona-Conakry-505
ssGP Zaire ebolavirus.	AJP15506.1	760243812	297	Sierra Leone: western urban	29-Oct-2014	Ebolavirus/H.sapiens-wt/SLE/2014/Makona-J0107
sGP Zaire ebolavirus.	AJP15505.1	760243811	364	Sierra Leone: western urban	29-Oct-2014	Ebolavirus/H.sapiens-wt/SLE/2014/Makona-J0107
virion spike glycoprotein precursor Zaire ebolavirus.	AJP15504.1	760243810	676	Sierra Leone: western urban	29-Oct-2014	Ebolavirus/H.sapiens-wt/SLE/2014/Makona-J0107
ssGP Zaire ebolavirus.	AJP15497.1	760243802	297	Sierra Leone: western rural	28-Oct-2014	Ebolavirus/H.sapiens-wt/SLE/2014/Makona-J0106
sGP Zaire ebolavirus.	AJP15496.1	760243801	364	Sierra Leone: western rural	28-Oct-2014	Ebolavirus/H.sapiens-wt/SLE/2014/Makona-J0106
virion spike glycoprotein precursor Zaire ebolavirus.	AJP15495.1	760243800	676	Sierra Leone: western rural	28-Oct-2014	Ebolavirus/H.sapiens-wt/SLE/2014/Makona-J0106
ssGP Zaire ebolavirus.	AJP15488.1	760243792	297	Sierra Leone: Port Loko	29-Oct-2014	Ebolavirus/H.sapiens-wt/SLE/2014/Makona-J0105
sGP Zaire ebolavirus.	AJP15487.1	760243791	364	Sierra Leone: Port Loko	29-Oct-2014	Ebolavirus/H.sapiens-wt/SLE/2014/Makona-J0105
virion spike glycoprotein precursor Zaire ebolavirus.	AJP15486.1	760243790	676	Sierra Leone: Port Loko	29-Oct-2014	Ebolavirus/H.sapiens-wt/SLE/2014/Makona-J0105
ssGP Zaire ebolavirus.	AJP15479.1	760243782	297	Sierra Leone: Port Loko	29-Oct-2014	Ebolavirus/H.sapiens-wt/SLE/2014/Makona-J0104
sGP Zaire ebolavirus.	AJP15478.1	760243781	364	Sierra Leone: Port Loko	29-Oct-2014	Ebolavirus/H.sapiens-wt/SLE/2014/Makona-J0104
virion spike glycoprotein precursor Zaire ebolavirus.	AJP15477.1	760243780	676	Sierra Leone: Port Loko	29-Oct-2014	Ebolavirus/H.sapiens-wt/SLE/2014/Makona-J0104
ssGP Zaire ebolavirus.	AJP15470.1	760243772	297	Sierra Leone: Kambia	28-Oct-2014	Ebolavirus/H.sapiens-wt/SLE/2014/Makona-J0099
sGP Zaire ebolavirus.	AJP15469.1	760243771	364	Sierra Leone: Kambia	28-Oct-2014	Ebolavirus/H.sapiens-wt/SLE/2014/Makona-J0099
virion spike glycoprotein precursor Zaire ebolavirus.	AJP15468.1	760243770	676	Sierra Leone: Kambia	28-Oct-2014	Ebolavirus/H.sapiens-wt/SLE/2014/Makona-J0099
ssGP Zaire ebolavirus.	AJP15461.1	760243762	297	Sierra Leone: western rural	28-Oct-2014	Ebolavirus/H.sapiens-wt/SLE/2014/Makona-J0098
sGP Zaire ebolavirus.	AJP15460.1	760243761	364	Sierra Leone: western rural	28-Oct-2014	Ebolavirus/H.sapiens-wt/SLE/2014/Makona-J0098
virion spike glycoprotein precursor Zaire ebolavirus.	AJP15459.1	760243760	676	Sierra Leone: western rural	28-Oct-2014	Ebolavirus/H.sapiens-wt/SLE/2014/Makona-J0098
ssGP Zaire ebolavirus.	AJP15452.1	760243752	297	Sierra Leone: western rural	28-Oct-2014	Ebolavirus/H.sapiens-wt/SLE/2014/Makona-J0097
virion spike glycoprotein precursor Zaire ebolavirus.	AJP15451.1	760243751	676	Sierra Leone: western rural	28-Oct-2014	Ebolavirus/H.sapiens-wt/SLE/2014/Makona-J0097
ssGP Zaire ebolavirus.	AJP15444.1	760243743	297	Sierra Leone: western rural	27-Oct-2014	Ebolavirus/H.sapiens-wt/SLE/2014/Makona-J0094
sGP Zaire ebolavirus.	AJP15443.1	760243742	364	Sierra Leone: western rural	27-Oct-2014	Ebolavirus/H.sapiens-wt/SLE/2014/Makona-J0094
virion spike glycoprotein precursor Zaire ebolavirus.	AJP15442.1	760243741	676	Sierra Leone: western rural	27-Oct-2014	Ebolavirus/H.sapiens-wt/SLE/2014/Makona-J0094
ssGP Zaire ebolavirus.	AJP15435.1	760243733	297	Sierra Leone: western rural	24-Oct-2014	Ebolavirus/H.sapiens-wt/SLE/2014/Makona-J0093
sGP Zaire ebolavirus.	AJP15434.1	760243732	364	Sierra Leone: western rural	24-Oct-2014	Ebolavirus/H.sapiens-wt/SLE/2014/Makona-J0093
virion spike glycoprotein precursor Zaire ebolavirus.	AJP15433.1	760243731	676	Sierra Leone: western rural	24-Oct-2014	Ebolavirus/H.sapiens-wt/SLE/2014/Makona-J0093
ssGP Zaire ebolavirus.	AJP15426.1	760243723	297	Sierra Leone: western area	25-Oct-2014	Ebolavirus/H.sapiens-wt/SLE/2014/Makona-J0091
sGP Zaire ebolavirus.	AJP15425.1	760243722	364	Sierra Leone: western area	25-Oct-2014	Ebolavirus/H.sapiens-wt/SLE/2014/Makona-J0091
virion spike glycoprotein precursor Zaire ebolavirus.	AJP15424.1	760243721	676	Sierra Leone: western area	25-Oct-2014	Ebolavirus/H.sapiens-wt/SLE/2014/Makona-J0091
ssGP Zaire ebolavirus.	AJP15417.1	760243713	297	Sierra Leone: western area	23-Oct-2014	Ebolavirus/H.sapiens-wt/SLE/2014/Makona-J0089
sGP Zaire ebolavirus.	AJP15416.1	760243712	364	Sierra Leone: western area	23-Oct-2014	Ebolavirus/H.sapiens-wt/SLE/2014/Makona-J0089
virion spike glycoprotein precursor Zaire ebolavirus.	AJP15415.1	760243711	676	Sierra Leone: western area	23-Oct-2014	Ebolavirus/H.sapiens-wt/SLE/2014/Makona-J0089
ssGP Zaire ebolavirus.	AJP15408.1	760243703	297	Sierra Leone: Bombali	25-Sep-2014	Ebolavirus/H.sapiens-wt/SLE/2014/Makona-J0022
sGP Zaire ebolavirus.	AJP15407.1	760243702	364	Sierra Leone: Bombali	25-Sep-2014	Ebolavirus/H.sapiens-wt/SLE/2014/Makona-J0022
virion spike glycoprotein precursor Zaire ebolavirus.	AJP15406.1	760243701	676	Sierra Leone: Bombali	25-Sep-2014	Ebolavirus/H.sapiens-wt/SLE/2014/Makona-J0022
ssGP Zaire ebolavirus.	AJP15399.1	760243693	297	Sierra Leone: Bombali	29-Sep-2014	Ebolavirus/H.sapiens-wt/SLE/2014/Makona-J0021
sGP Zaire ebolavirus.	AJP15398.1	760243692	364	Sierra Leone: Bombali	29-Sep-2014	Ebolavirus/H.sapiens-wt/SLE/2014/Makona-J0021
virion spike glycoprotein precursor Zaire ebolavirus.	AJP15397.1	760243691	676	Sierra Leone: Bombali	29-Sep-2014	Ebolavirus/H.sapiens-wt/SLE/2014/Makona-J0021
ssGP Zaire ebolavirus.	AJP15390.1	760243683	297	Sierra Leone: Bombali	25-Sep-2014	Ebolavirus/H.sapiens-wt/SLE/2014/Makona-J0020
sGP Zaire ebolavirus.	AJP15389.1	760243682	364	Sierra Leone: Bombali	25-Sep-2014	Ebolavirus/H.sapiens-wt/SLE/2014/Makona-J0020
virion spike glycoprotein precursor Zaire ebolavirus.	AJP15388.1	760243681	676	Sierra Leone: Bombali	25-Sep-2014	Ebolavirus/H.sapiens-wt/SLE/2014/Makona-J0020
ssGP Zaire ebolavirus.	AJP15381.1	760243673	297	Sierra Leone: Bombali	25-Sep-2014	Ebolavirus/H.sapiens-wt/SLE/2014/Makona-J0019
sGP Zaire ebolavirus.	AJP15380.1	760243672	364	Sierra Leone: Bombali	25-Sep-2014	Ebolavirus/H.sapiens-wt/SLE/2014/Makona-J0019
virion spike glycoprotein precursor Zaire ebolavirus.	AJP15379.1	760243671	676	Sierra Leone: Bombali	25-Sep-2014	Ebolavirus/H.sapiens-wt/SLE/2014/Makona-J0019
ssGP Zaire ebolavirus.	AJP15372.1	760243663	297	Sierra Leone: Port Loko	16-Oct-2014	Ebolavirus/H.sapiens-wt/SLE/2014/Makona-J0084
sGP Zaire ebolavirus.	AJP15371.1	760243662	364	Sierra Leone: Port Loko	16-Oct-2014	Ebolavirus/H.sapiens-wt/SLE/2014/Makona-J0084
virion spike glycoprotein precursor Zaire ebolavirus.	AJP15370.1	760243661	676	Sierra Leone: Port Loko	16-Oct-2014	Ebolavirus/H.sapiens-wt/SLE/2014/Makona-J0084
ssGP Zaire ebolavirus.	AJP15363.1	760243653	297	Sierra Leone: Port Loko	18-Oct-2014	Ebolavirus/H.sapiens-wt/SLE/2014/Makona-J0083
sGP Zaire ebolavirus.	AJP15362.1	760243652	364	Sierra Leone: Port Loko	18-Oct-2014	Ebolavirus/H.sapiens-wt/SLE/2014/Makona-J0083
virion spike glycoprotein precursor Zaire ebolavirus.	AJP15361.1	760243651	676	Sierra Leone: Port Loko	18-Oct-2014	Ebolavirus/H.sapiens-wt/SLE/2014/Makona-J0083
ssGP Zaire ebolavirus.	AJP15354.1	760243643	297	Sierra Leone: western rural	16-Oct-2014	Ebolavirus/H.sapiens-wt/SLE/2014/Makona-J0082
sGP Zaire ebolavirus.	AJP15353.1	760243642	364	Sierra Leone: western rural	16-Oct-2014	Ebolavirus/H.sapiens-wt/SLE/2014/Makona-J0082
virion spike glycoprotein precursor Zaire ebolavirus.	AJP15352.1	760243641	676	Sierra Leone: western rural	16-Oct-2014	Ebolavirus/H.sapiens-wt/SLE/2014/Makona-J0082
ssGP Zaire ebolavirus.	AJP15345.1	760243633	297	Sierra Leone: western rural	16-Oct-2014	Ebolavirus/H.sapiens-wt/SLE/2014/Makona-J0081
sGP Zaire ebolavirus.	AJP15344.1	760243632	364	Sierra Leone: western rural	16-Oct-2014	Ebolavirus/H.sapiens-wt/SLE/2014/Makona-J0081
virion spike glycoprotein precursor Zaire ebolavirus.	AJP15343.1	760243631	676	Sierra Leone: western rural	16-Oct-2014	Ebolavirus/H.sapiens-wt/SLE/2014/Makona-J0081
ssGP Zaire ebolavirus.	AJP15336.1	760243623	297	Sierra Leone: Port Loko	18-Oct-2014	Ebolavirus/H.sapiens-wt/SLE/2014/Makona-J0080
sGP Zaire ebolavirus.	AJP15335.1	760243622	364	Sierra Leone: Port Loko	18-Oct-2014	Ebolavirus/H.sapiens-wt/SLE/2014/Makona-J0080
virion spike glycoprotein precursor Zaire ebolavirus.	AJP15334.1	760243621	676	Sierra Leone: Port Loko	18-Oct-2014	Ebolavirus/H.sapiens-wt/SLE/2014/Makona-J0080
ssGP Zaire ebolavirus.	AJP15327.1	760243613	297	Sierra Leone: western rural	16-Oct-2014	Ebolavirus/H.sapiens-wt/SLE/2014/Makona-J0079
sGP Zaire ebolavirus.	AJP15326.1	760243612	364	Sierra Leone: western rural	16-Oct-2014	Ebolavirus/H.sapiens-wt/SLE/2014/Makona-J0079
virion spike glycoprotein precursor Zaire ebolavirus.	AJP15325.1	760243611	676	Sierra Leone: western rural	16-Oct-2014	Ebolavirus/H.sapiens-wt/SLE/2014/Makona-J0079
ssGP Zaire ebolavirus.	AJP15318.1	760243603	297	Sierra Leone: Bombali	26-Sep-2014	Ebolavirus/H.sapiens-wt/SLE/2014/Makona-J0017
sGP Zaire ebolavirus.	AJP15317.1	760243602	364	Sierra Leone: Bombali	26-Sep-2014	Ebolavirus/H.sapiens-wt/SLE/2014/Makona-J0017
virion spike glycoprotein precursor Zaire ebolavirus.	AJP15316.1	760243601	676	Sierra Leone: Bombali	26-Sep-2014	Ebolavirus/H.sapiens-wt/SLE/2014/Makona-J0017
ssGP Zaire ebolavirus.	AJP15309.1	760243593	297	Sierra Leone: western urban	18-Oct-2014	Ebolavirus/H.sapiens-wt/SLE/2014/Makona-J0078
sGP Zaire ebolavirus.	AJP15308.1	760243592	364	Sierra Leone: western urban	18-Oct-2014	Ebolavirus/H.sapiens-wt/SLE/2014/Makona-J0078
virion spike glycoprotein precursor Zaire ebolavirus.	AJP15307.1	760243591	676	Sierra Leone: western urban	18-Oct-2014	Ebolavirus/H.sapiens-wt/SLE/2014/Makona-J0078
ssGP Zaire ebolavirus.	AJP15300.1	760243583	297	Sierra Leone: western rural	17-Oct-2014	Ebolavirus/H.sapiens-wt/SLE/2014/Makona-J0077
sGP Zaire ebolavirus.	AJP15299.1	760243582	364	Sierra Leone: western rural	17-Oct-2014	Ebolavirus/H.sapiens-wt/SLE/2014/Makona-J0077
virion spike glycoprotein precursor Zaire ebolavirus.	AJP15298.1	760243581	676	Sierra Leone: western rural	17-Oct-2014	Ebolavirus/H.sapiens-wt/SLE/2014/Makona-J0077
ssGP Zaire ebolavirus.	AJP15291.1	760243573	297	Sierra Leone: western rural	17-Oct-2014	Ebolavirus/H.sapiens-wt/SLE/2014/Makona-J0076
sGP Zaire ebolavirus.	AJP15290.1	760243572	364	Sierra Leone: western rural	17-Oct-2014	Ebolavirus/H.sapiens-wt/SLE/2014/Makona-J0076
virion spike glycoprotein precursor Zaire ebolavirus.	AJP15289.1	760243571	676	Sierra Leone: western rural	17-Oct-2014	Ebolavirus/H.sapiens-wt/SLE/2014/Makona-J0076
ssGP Zaire ebolavirus.	AJP15282.1	760243563	297	Sierra Leone: western rural	17-Oct-2014	Ebolavirus/H.sapiens-wt/SLE/2014/Makona-J0075
sGP Zaire ebolavirus.	AJP15281.1	760243562	364	Sierra Leone: western rural	17-Oct-2014	Ebolavirus/H.sapiens-wt/SLE/2014/Makona-J0075
virion spike glycoprotein precursor Zaire ebolavirus.	AJP15280.1	760243561	676	Sierra Leone: western rural	17-Oct-2014	Ebolavirus/H.sapiens-wt/SLE/2014/Makona-J0075
ssGP Zaire ebolavirus.	AJP15273.1	760243553	297	Sierra Leone: western rural	30-Sep-2014	Ebolavirus/H.sapiens-wt/SLE/2014/Makona-J0016
sGP Zaire ebolavirus.	AJP15272.1	760243552	364	Sierra Leone: western rural	30-Sep-2014	Ebolavirus/H.sapiens-wt/SLE/2014/Makona-J0016
virion spike glycoprotein precursor Zaire ebolavirus.	AJP15271.1	760243551	676	Sierra Leone: western rural	30-Sep-2014	Ebolavirus/H.sapiens-wt/SLE/2014/Makona-J0016
ssGP Zaire ebolavirus.	AJP15264.1	760243543	297	Sierra Leone: Bombali	26-Sep-2014	Ebolavirus/H.sapiens-wt/SLE/2014/Makona-J0015
sGP Zaire ebolavirus.	AJP15263.1	760243542	364	Sierra Leone: Bombali	26-Sep-2014	Ebolavirus/H.sapiens-wt/SLE/2014/Makona-J0015
virion spike glycoprotein precursor Zaire ebolavirus.	AJP15262.1	760243541	676	Sierra Leone: Bombali	26-Sep-2014	Ebolavirus/H.sapiens-wt/SLE/2014/Makona-J0015
ssGP Zaire ebolavirus.	AJP15255.1	760243533	297	Sierra Leone: Port Loko	29-Sep-2014	Ebolavirus/H.sapiens-wt/SLE/2014/Makona-J0014
sGP Zaire ebolavirus.	AJP15254.1	760243532	364	Sierra Leone: Port Loko	29-Sep-2014	Ebolavirus/H.sapiens-wt/SLE/2014/Makona-J0014
virion spike glycoprotein precursor Zaire ebolavirus.	AJP15253.1	760243531	676	Sierra Leone: Port Loko	29-Sep-2014	Ebolavirus/H.sapiens-wt/SLE/2014/Makona-J0014
ssGP Zaire ebolavirus.	AJP15246.1	760243523	297	Sierra Leone: western rural	13-Oct-2014	Ebolavirus/H.sapiens-wt/SLE/2014/Makona-J0074
sGP Zaire ebolavirus.	AJP15245.1	760243522	364	Sierra Leone: western rural	13-Oct-2014	Ebolavirus/H.sapiens-wt/SLE/2014/Makona-J0074
virion spike glycoprotein precursor Zaire ebolavirus.	AJP15244.1	760243521	676	Sierra Leone: western rural	13-Oct-2014	Ebolavirus/H.sapiens-wt/SLE/2014/Makona-J0074
ssGP Zaire ebolavirus.	AJP15237.1	760243513	297	Sierra Leone: Port Loko	12-Oct-2014	Ebolavirus/H.sapiens-wt/SLE/2014/Makona-J0073
sGP Zaire ebolavirus.	AJP15236.1	760243512	364	Sierra Leone: Port Loko	12-Oct-2014	Ebolavirus/H.sapiens-wt/SLE/2014/Makona-J0073
virion spike glycoprotein precursor Zaire ebolavirus.	AJP15235.1	760243511	676	Sierra Leone: Port Loko	12-Oct-2014	Ebolavirus/H.sapiens-wt/SLE/2014/Makona-J0073
ssGP Zaire ebolavirus.	AJP15228.1	760243503	297	Sierra Leone: Port Loko	09-Oct-2014	Ebolavirus/H.sapiens-wt/SLE/2014/Makona-J0072
sGP Zaire ebolavirus.	AJP15227.1	760243502	364	Sierra Leone: Port Loko	09-Oct-2014	Ebolavirus/H.sapiens-wt/SLE/2014/Makona-J0072
virion spike glycoprotein precursor Zaire ebolavirus.	AJP15226.1	760243501	676	Sierra Leone: Port Loko	09-Oct-2014	Ebolavirus/H.sapiens-wt/SLE/2014/Makona-J0072
ssGP Zaire ebolavirus.	AJP15219.1	760243493	297	Sierra Leone: Port Loko	09-Oct-2014	Ebolavirus/H.sapiens-wt/SLE/2014/Makona-J0071
sGP Zaire ebolavirus.	AJP15218.1	760243492	364	Sierra Leone: Port Loko	09-Oct-2014	Ebolavirus/H.sapiens-wt/SLE/2014/Makona-J0071
virion spike glycoprotein precursor Zaire ebolavirus.	AJP15217.1	760243491	676	Sierra Leone: Port Loko	09-Oct-2014	Ebolavirus/H.sapiens-wt/SLE/2014/Makona-J0071
ssGP Zaire ebolavirus.	AJP15210.1	760243483	297	Sierra Leone: Port Loko	09-Oct-2014	Ebolavirus/H.sapiens-wt/SLE/2014/Makona-J0070
sGP Zaire ebolavirus.	AJP15209.1	760243482	364	Sierra Leone: Port Loko	09-Oct-2014	Ebolavirus/H.sapiens-wt/SLE/2014/Makona-J0070
virion spike glycoprotein precursor Zaire ebolavirus.	AJP15208.1	760243481	676	Sierra Leone: Port Loko	09-Oct-2014	Ebolavirus/H.sapiens-wt/SLE/2014/Makona-J0070
ssGP Zaire ebolavirus.	AJP15201.1	760243473	297	Sierra Leone: Port Loko	28-Sep-2014	Ebolavirus/H.sapiens-wt/SLE/2014/Makona-J0009
sGP Zaire ebolavirus.	AJP15200.1	760243472	364	Sierra Leone: Port Loko	28-Sep-2014	Ebolavirus/H.sapiens-wt/SLE/2014/Makona-J0009
virion spike glycoprotein precursor Zaire ebolavirus.	AJP15199.1	760243471	676	Sierra Leone: Port Loko	28-Sep-2014	Ebolavirus/H.sapiens-wt/SLE/2014/Makona-J0009
ssGP Zaire ebolavirus.	AJP15192.1	760243463	297	Sierra Leone: western rural	09-Oct-2014	Ebolavirus/H.sapiens-wt/SLE/2014/Makona-J0069
sGP Zaire ebolavirus.	AJP15191.1	760243462	364	Sierra Leone: western rural	09-Oct-2014	Ebolavirus/H.sapiens-wt/SLE/2014/Makona-J0069
virion spike glycoprotein precursor Zaire ebolavirus.	AJP15190.1	760243461	676	Sierra Leone: western rural	09-Oct-2014	Ebolavirus/H.sapiens-wt/SLE/2014/Makona-J0069
ssGP Zaire ebolavirus.	AJP15183.1	760243453	297	Sierra Leone: western rural	09-Oct-2014	Ebolavirus/H.sapiens-wt/SLE/2014/Makona-J0068
sGP Zaire ebolavirus.	AJP15182.1	760243452	364	Sierra Leone: western rural	09-Oct-2014	Ebolavirus/H.sapiens-wt/SLE/2014/Makona-J0068
virion spike glycoprotein precursor Zaire ebolavirus.	AJP15181.1	760243451	676	Sierra Leone: western rural	09-Oct-2014	Ebolavirus/H.sapiens-wt/SLE/2014/Makona-J0068
ssGP Zaire ebolavirus.	AJP15174.1	760243443	297	Sierra Leone: Port Loko	09-Oct-2014	Ebolavirus/H.sapiens-wt/SLE/2014/Makona-J0067
sGP Zaire ebolavirus.	AJP15173.1	760243442	364	Sierra Leone: Port Loko	09-Oct-2014	Ebolavirus/H.sapiens-wt/SLE/2014/Makona-J0067
virion spike glycoprotein precursor Zaire ebolavirus.	AJP15172.1	760243441	676	Sierra Leone: Port Loko	09-Oct-2014	Ebolavirus/H.sapiens-wt/SLE/2014/Makona-J0067
ssGP Zaire ebolavirus.	AJP15165.1	760243433	297	Sierra Leone: western area	10-Oct-2014	Ebolavirus/H.sapiens-wt/SLE/2014/Makona-J0066
sGP Zaire ebolavirus.	AJP15164.1	760243432	364	Sierra Leone: western area	10-Oct-2014	Ebolavirus/H.sapiens-wt/SLE/2014/Makona-J0066
virion spike glycoprotein precursor Zaire ebolavirus.	AJP15163.1	760243431	676	Sierra Leone: western area	10-Oct-2014	Ebolavirus/H.sapiens-wt/SLE/2014/Makona-J0066
ssGP Zaire ebolavirus.	AJP15156.1	760243423	297	Sierra Leone: western rural	09-Oct-2014	Ebolavirus/H.sapiens-wt/SLE/2014/Makona-J0065
sGP Zaire ebolavirus.	AJP15155.1	760243422	364	Sierra Leone: western rural	09-Oct-2014	Ebolavirus/H.sapiens-wt/SLE/2014/Makona-J0065
virion spike glycoprotein precursor Zaire ebolavirus.	AJP15154.1	760243421	676	Sierra Leone: western rural	09-Oct-2014	Ebolavirus/H.sapiens-wt/SLE/2014/Makona-J0065
ssGP Zaire ebolavirus.	AJP15147.1	760243413	297	Sierra Leone: western urban	09-Oct-2014	Ebolavirus/H.sapiens-wt/SLE/2014/Makona-J0064
sGP Zaire ebolavirus.	AJP15146.1	760243412	364	Sierra Leone: western urban	09-Oct-2014	Ebolavirus/H.sapiens-wt/SLE/2014/Makona-J0064
virion spike glycoprotein precursor Zaire ebolavirus.	AJP15145.1	760243411	676	Sierra Leone: western urban	09-Oct-2014	Ebolavirus/H.sapiens-wt/SLE/2014/Makona-J0064
ssGP Zaire ebolavirus.	AJP15138.1	760243403	297	Sierra Leone: Port Loko	10-Oct-2014	Ebolavirus/H.sapiens-wt/SLE/2014/Makona-J0062
sGP Zaire ebolavirus.	AJP15137.1	760243402	364	Sierra Leone: Port Loko	10-Oct-2014	Ebolavirus/H.sapiens-wt/SLE/2014/Makona-J0062
virion spike glycoprotein precursor Zaire ebolavirus.	AJP15136.1	760243401	676	Sierra Leone: Port Loko	10-Oct-2014	Ebolavirus/H.sapiens-wt/SLE/2014/Makona-J0062
ssGP Zaire ebolavirus.	AJP15129.1	760243393	297	Sierra Leone: western urban	06-Oct-2014	Ebolavirus/H.sapiens-wt/SLE/2014/Makona-J0060
sGP Zaire ebolavirus.	AJP15128.1	760243392	364	Sierra Leone: western urban	06-Oct-2014	Ebolavirus/H.sapiens-wt/SLE/2014/Makona-J0060
virion spike glycoprotein precursor Zaire ebolavirus.	AJP15127.1	760243391	676	Sierra Leone: western urban	06-Oct-2014	Ebolavirus/H.sapiens-wt/SLE/2014/Makona-J0060
ssGP Zaire ebolavirus.	AJP15120.1	760243383	297	Sierra Leone: western rural	08-Oct-2014	Ebolavirus/H.sapiens-wt/SLE/2014/Makona-J0059
sGP Zaire ebolavirus.	AJP15119.1	760243382	364	Sierra Leone: western rural	08-Oct-2014	Ebolavirus/H.sapiens-wt/SLE/2014/Makona-J0059
virion spike glycoprotein precursor Zaire ebolavirus.	AJP15118.1	760243381	676	Sierra Leone: western rural	08-Oct-2014	Ebolavirus/H.sapiens-wt/SLE/2014/Makona-J0059
ssGP Zaire ebolavirus.	AJP15111.1	760243373	297	Sierra Leone: Port Loko	08-Oct-2014	Ebolavirus/H.sapiens-wt/SLE/2014/Makona-J0058
sGP Zaire ebolavirus.	AJP15110.1	760243372	364	Sierra Leone: Port Loko	08-Oct-2014	Ebolavirus/H.sapiens-wt/SLE/2014/Makona-J0058
virion spike glycoprotein precursor Zaire ebolavirus.	AJP15109.1	760243371	676	Sierra Leone: Port Loko	08-Oct-2014	Ebolavirus/H.sapiens-wt/SLE/2014/Makona-J0058
ssGP Zaire ebolavirus.	AJP15102.1	760243363	297	Sierra Leone: Port Loko	06-Oct-2014	Ebolavirus/H.sapiens-wt/SLE/2014/Makona-J0055
sGP Zaire ebolavirus.	AJP15101.1	760243362	364	Sierra Leone: Port Loko	06-Oct-2014	Ebolavirus/H.sapiens-wt/SLE/2014/Makona-J0055
virion spike glycoprotein precursor Zaire ebolavirus.	AJP15100.1	760243361	676	Sierra Leone: Port Loko	06-Oct-2014	Ebolavirus/H.sapiens-wt/SLE/2014/Makona-J0055
ssGP Zaire ebolavirus.	AJP15093.1	760243348	297	Sierra Leone: western rural	06-Oct-2014	Ebolavirus/H.sapiens-wt/SLE/2014/Makona-J0054
sGP Zaire ebolavirus.	AJP15092.1	760243347	364	Sierra Leone: western rural	06-Oct-2014	Ebolavirus/H.sapiens-wt/SLE/2014/Makona-J0054
virion spike glycoprotein precursor Zaire ebolavirus.	AJP15091.1	760243346	676	Sierra Leone: western rural	06-Oct-2014	Ebolavirus/H.sapiens-wt/SLE/2014/Makona-J0054
ssGP Zaire ebolavirus.	AJP15084.1	760243337	297	Sierra Leone: western rural	06-Oct-2014	Ebolavirus/H.sapiens-wt/SLE/2014/Makona-J0053
sGP Zaire ebolavirus.	AJP15083.1	760243336	364	Sierra Leone: western rural	06-Oct-2014	Ebolavirus/H.sapiens-wt/SLE/2014/Makona-J0053
virion spike glycoprotein precursor Zaire ebolavirus.	AJP15082.1	760243335	676	Sierra Leone: western rural	06-Oct-2014	Ebolavirus/H.sapiens-wt/SLE/2014/Makona-J0053
ssGP Zaire ebolavirus.	AJP15075.1	760243325	297	Sierra Leone: western urban	08-Oct-2014	Ebolavirus/H.sapiens-wt/SLE/2014/Makona-J0052
sGP Zaire ebolavirus.	AJP15074.1	760243324	364	Sierra Leone: western urban	08-Oct-2014	Ebolavirus/H.sapiens-wt/SLE/2014/Makona-J0052
virion spike glycoprotein precursor Zaire ebolavirus.	AJP15073.1	760243323	676	Sierra Leone: western urban	08-Oct-2014	Ebolavirus/H.sapiens-wt/SLE/2014/Makona-J0052
ssGP Zaire ebolavirus.	AJP15066.1	760243314	297	Sierra Leone: western urban	05-Oct-2014	Ebolavirus/H.sapiens-wt/SLE/2014/Makona-J0050
sGP Zaire ebolavirus.	AJP15065.1	760243313	364	Sierra Leone: western urban	05-Oct-2014	Ebolavirus/H.sapiens-wt/SLE/2014/Makona-J0050
virion spike glycoprotein precursor Zaire ebolavirus.	AJP15064.1	760243312	676	Sierra Leone: western urban	05-Oct-2014	Ebolavirus/H.sapiens-wt/SLE/2014/Makona-J0050
ssGP Zaire ebolavirus.	AJP15057.1	760243304	297	Sierra Leone: western urban	29-Sep-2014	Ebolavirus/H.sapiens-wt/SLE/2014/Makona-J0008
sGP Zaire ebolavirus.	AJP15056.1	760243303	364	Sierra Leone: western urban	29-Sep-2014	Ebolavirus/H.sapiens-wt/SLE/2014/Makona-J0008
virion spike glycoprotein precursor Zaire ebolavirus.	AJP15055.1	760243302	676	Sierra Leone: western urban	29-Sep-2014	Ebolavirus/H.sapiens-wt/SLE/2014/Makona-J0008
ssGP Zaire ebolavirus.	AJP15048.1	760243294	297	Sierra Leone: Port Loko	07-Oct-2014	Ebolavirus/H.sapiens-wt/SLE/2014/Makona-J0049
sGP Zaire ebolavirus.	AJP15047.1	760243293	364	Sierra Leone: Port Loko	07-Oct-2014	Ebolavirus/H.sapiens-wt/SLE/2014/Makona-J0049
virion spike glycoprotein precursor Zaire ebolavirus.	AJP15046.1	760243292	676	Sierra Leone: Port Loko	07-Oct-2014	Ebolavirus/H.sapiens-wt/SLE/2014/Makona-J0049
ssGP Zaire ebolavirus.	AJP15039.1	760243278	297	Sierra Leone: western rural	05-Oct-2014	Ebolavirus/H.sapiens-wt/SLE/2014/Makona-J0048
sGP Zaire ebolavirus.	AJP15038.1	760243277	364	Sierra Leone: western rural	05-Oct-2014	Ebolavirus/H.sapiens-wt/SLE/2014/Makona-J0048
virion spike glycoprotein precursor Zaire ebolavirus.	AJP15037.1	760243276	676	Sierra Leone: western rural	05-Oct-2014	Ebolavirus/H.sapiens-wt/SLE/2014/Makona-J0048
ssGP Zaire ebolavirus.	AJP15030.1	760243265	297	Sierra Leone: western rural	07-Oct-2014	Ebolavirus/H.sapiens-wt/SLE/2014/Makona-J0046
sGP Zaire ebolavirus.	AJP15029.1	760243264	364	Sierra Leone: western rural	07-Oct-2014	Ebolavirus/H.sapiens-wt/SLE/2014/Makona-J0046
virion spike glycoprotein precursor Zaire ebolavirus.	AJP15028.1	760243263	676	Sierra Leone: western rural	07-Oct-2014	Ebolavirus/H.sapiens-wt/SLE/2014/Makona-J0046
ssGP Zaire ebolavirus.	AJP15021.1	760243253	297	Sierra Leone: western urban	05-Oct-2014	Ebolavirus/H.sapiens-wt/SLE/2014/Makona-J0045
sGP Zaire ebolavirus.	AJP15020.1	760243252	364	Sierra Leone: western urban	05-Oct-2014	Ebolavirus/H.sapiens-wt/SLE/2014/Makona-J0045
virion spike glycoprotein precursor Zaire ebolavirus.	AJP15019.1	760243251	676	Sierra Leone: western urban	05-Oct-2014	Ebolavirus/H.sapiens-wt/SLE/2014/Makona-J0045
ssGP Zaire ebolavirus.	AJP15012.1	760243242	297	Sierra Leone: western rural	05-Oct-2014	Ebolavirus/H.sapiens-wt/SLE/2014/Makona-J0044
sGP Zaire ebolavirus.	AJP15011.1	760243241	364	Sierra Leone: western rural	05-Oct-2014	Ebolavirus/H.sapiens-wt/SLE/2014/Makona-J0044
virion spike glycoprotein precursor Zaire ebolavirus.	AJP15010.1	760243240	676	Sierra Leone: western rural	05-Oct-2014	Ebolavirus/H.sapiens-wt/SLE/2014/Makona-J0044
ssGP Zaire ebolavirus.	AJP15003.1	760243230	297	Sierra Leone: western area	04-Oct-2014	Ebolavirus/H.sapiens-wt/SLE/2014/Makona-J0043
sGP Zaire ebolavirus.	AJP15002.1	760243229	364	Sierra Leone: western area	04-Oct-2014	Ebolavirus/H.sapiens-wt/SLE/2014/Makona-J0043
virion spike glycoprotein precursor Zaire ebolavirus.	AJP15001.1	760243228	676	Sierra Leone: western area	04-Oct-2014	Ebolavirus/H.sapiens-wt/SLE/2014/Makona-J0043
ssGP Zaire ebolavirus.	AJP14994.1	760243213	297	Sierra Leone: western rural	04-Oct-2014	Ebolavirus/H.sapiens-wt/SLE/2014/Makona-J0042
sGP Zaire ebolavirus.	AJP14993.1	760243212	364	Sierra Leone: western rural	04-Oct-2014	Ebolavirus/H.sapiens-wt/SLE/2014/Makona-J0042
virion spike glycoprotein precursor Zaire ebolavirus.	AJP14992.1	760243211	676	Sierra Leone: western rural	04-Oct-2014	Ebolavirus/H.sapiens-wt/SLE/2014/Makona-J0042
ssGP Zaire ebolavirus.	AJP14985.1	760243198	297	Sierra Leone: western area	04-Oct-2014	Ebolavirus/H.sapiens-wt/SLE/2014/Makona-J0041
sGP Zaire ebolavirus.	AJP14984.1	760243197	364	Sierra Leone: western area	04-Oct-2014	Ebolavirus/H.sapiens-wt/SLE/2014/Makona-J0041
virion spike glycoprotein precursor Zaire ebolavirus.	AJP14983.1	760243196	676	Sierra Leone: western area	04-Oct-2014	Ebolavirus/H.sapiens-wt/SLE/2014/Makona-J0041
ssGP Zaire ebolavirus.	AJP14976.1	760243188	297	Sierra Leone: western area	11-Nov-2014	Ebolavirus/H.sapiens-wt/SLE/2014/Makona-J0175
sGP Zaire ebolavirus.	AJP14975.1	760243187	364	Sierra Leone: western area	11-Nov-2014	Ebolavirus/H.sapiens-wt/SLE/2014/Makona-J0175
virion spike glycoprotein precursor Zaire ebolavirus.	AJP14974.1	760243186	676	Sierra Leone: western area	11-Nov-2014	Ebolavirus/H.sapiens-wt/SLE/2014/Makona-J0175
ssGP Zaire ebolavirus.	AJP14967.1	760243178	297	Sierra Leone: western area	11-Nov-2014	Ebolavirus/H.sapiens-wt/SLE/2014/Makona-J0174
sGP Zaire ebolavirus.	AJP14966.1	760243177	364	Sierra Leone: western area	11-Nov-2014	Ebolavirus/H.sapiens-wt/SLE/2014/Makona-J0174
virion spike glycoprotein precursor Zaire ebolavirus.	AJP14965.1	760243176	676	Sierra Leone: western area	11-Nov-2014	Ebolavirus/H.sapiens-wt/SLE/2014/Makona-J0174
ssGP Zaire ebolavirus.	AJP14958.1	760243168	297	Sierra Leone: western rural	10-Nov-2014	Ebolavirus/H.sapiens-wt/SLE/2014/Makona-J0171
sGP Zaire ebolavirus.	AJP14957.1	760243167	364	Sierra Leone: western rural	10-Nov-2014	Ebolavirus/H.sapiens-wt/SLE/2014/Makona-J0171
virion spike glycoprotein precursor Zaire ebolavirus.	AJP14956.1	760243166	676	Sierra Leone: western rural	10-Nov-2014	Ebolavirus/H.sapiens-wt/SLE/2014/Makona-J0171
ssGP Zaire ebolavirus.	AJP14949.1	760243158	297	Sierra Leone: western urban	09-Nov-2014	Ebolavirus/H.sapiens-wt/SLE/2014/Makona-J0169
sGP Zaire ebolavirus.	AJP14948.1	760243157	364	Sierra Leone: western urban	09-Nov-2014	Ebolavirus/H.sapiens-wt/SLE/2014/Makona-J0169
virion spike glycoprotein precursor Zaire ebolavirus.	AJP14947.1	760243156	676	Sierra Leone: western urban	09-Nov-2014	Ebolavirus/H.sapiens-wt/SLE/2014/Makona-J0169
ssGP Zaire ebolavirus.	AJP14940.1	760243148	297	Sierra Leone: western area	11-Nov-2014	Ebolavirus/H.sapiens-wt/SLE/2014/Makona-J0168
sGP Zaire ebolavirus.	AJP14939.1	760243147	364	Sierra Leone: western area	11-Nov-2014	Ebolavirus/H.sapiens-wt/SLE/2014/Makona-J0168
virion spike glycoprotein precursor Zaire ebolavirus.	AJP14938.1	760243146	676	Sierra Leone: western area	11-Nov-2014	Ebolavirus/H.sapiens-wt/SLE/2014/Makona-J0168
ssGP Zaire ebolavirus.	AJP14931.1	760243137	297	Sierra Leone: western urban	08-Nov-2014	Ebolavirus/H.sapiens-wt/SLE/2014/Makona-J0166
sGP Zaire ebolavirus.	AJP14930.1	760243136	364	Sierra Leone: western urban	08-Nov-2014	Ebolavirus/H.sapiens-wt/SLE/2014/Makona-J0166
virion spike glycoprotein precursor Zaire ebolavirus.	AJP14929.1	760243135	676	Sierra Leone: western urban	08-Nov-2014	Ebolavirus/H.sapiens-wt/SLE/2014/Makona-J0166
ssGP Zaire ebolavirus.	AJP14922.1	760243125	297	Sierra Leone: western urban	08-Nov-2014	Ebolavirus/H.sapiens-wt/SLE/2014/Makona-J0165
sGP Zaire ebolavirus.	AJP14921.1	760243124	364	Sierra Leone: western urban	08-Nov-2014	Ebolavirus/H.sapiens-wt/SLE/2014/Makona-J0165
virion spike glycoprotein precursor Zaire ebolavirus.	AJP14920.1	760243123	676	Sierra Leone: western urban	08-Nov-2014	Ebolavirus/H.sapiens-wt/SLE/2014/Makona-J0165
ssGP Zaire ebolavirus.	AJP14913.1	760243113	297	Sierra Leone: Port Loko	08-Nov-2014	Ebolavirus/H.sapiens-wt/SLE/2014/Makona-J0163
sGP Zaire ebolavirus.	AJP14912.1	760243112	364	Sierra Leone: Port Loko	08-Nov-2014	Ebolavirus/H.sapiens-wt/SLE/2014/Makona-J0163
virion spike glycoprotein precursor Zaire ebolavirus.	AJP14911.1	760243111	676	Sierra Leone: Port Loko	08-Nov-2014	Ebolavirus/H.sapiens-wt/SLE/2014/Makona-J0163
ssGP Zaire ebolavirus.	AJP14904.1	760243101	297	Sierra Leone: western urban	08-Nov-2014	Ebolavirus/H.sapiens-wt/SLE/2014/Makona-J0161
sGP Zaire ebolavirus.	AJP14903.1	760243100	364	Sierra Leone: western urban	08-Nov-2014	Ebolavirus/H.sapiens-wt/SLE/2014/Makona-J0161
virion spike glycoprotein precursor Zaire ebolavirus.	AJP14902.1	760243099	676	Sierra Leone: western urban	08-Nov-2014	Ebolavirus/H.sapiens-wt/SLE/2014/Makona-J0161
ssGP Zaire ebolavirus.	AJP14895.1	760243089	297	Sierra Leone: western rural	08-Nov-2014	Ebolavirus/H.sapiens-wt/SLE/2014/Makona-J0158
sGP Zaire ebolavirus.	AJP14894.1	760243088	364	Sierra Leone: western rural	08-Nov-2014	Ebolavirus/H.sapiens-wt/SLE/2014/Makona-J0158
virion spike glycoprotein precursor Zaire ebolavirus.	AJP14893.1	760243087	676	Sierra Leone: western rural	08-Nov-2014	Ebolavirus/H.sapiens-wt/SLE/2014/Makona-J0158
ssGP Zaire ebolavirus.	AJP14886.1	760243078	297	Sierra Leone: western urban	06-Nov-2014	Ebolavirus/H.sapiens-wt/SLE/2014/Makona-J0157
sGP Zaire ebolavirus.	AJP14885.1	760243077	364	Sierra Leone: western urban	06-Nov-2014	Ebolavirus/H.sapiens-wt/SLE/2014/Makona-J0157
virion spike glycoprotein precursor Zaire ebolavirus.	AJP14884.1	760243076	676	Sierra Leone: western urban	06-Nov-2014	Ebolavirus/H.sapiens-wt/SLE/2014/Makona-J0157
ssGP Zaire ebolavirus.	AJP14877.1	760243060	297	Sierra Leone: western urban	07-Nov-2014	Ebolavirus/H.sapiens-wt/SLE/2014/Makona-J0156
sGP Zaire ebolavirus.	AJP14876.1	760243059	364	Sierra Leone: western urban	07-Nov-2014	Ebolavirus/H.sapiens-wt/SLE/2014/Makona-J0156
virion spike glycoprotein precursor Zaire ebolavirus.	AJP14875.1	760243058	676	Sierra Leone: western urban	07-Nov-2014	Ebolavirus/H.sapiens-wt/SLE/2014/Makona-J0156
ssGP Zaire ebolavirus.	AJP14868.1	760243048	297	Sierra Leone: western area	07-Nov-2014	Ebolavirus/H.sapiens-wt/SLE/2014/Makona-J0155
sGP Zaire ebolavirus.	AJP14867.1	760243047	364	Sierra Leone: western area	07-Nov-2014	Ebolavirus/H.sapiens-wt/SLE/2014/Makona-J0155
virion spike glycoprotein precursor Zaire ebolavirus.	AJP14866.1	760243046	676	Sierra Leone: western area	07-Nov-2014	Ebolavirus/H.sapiens-wt/SLE/2014/Makona-J0155
ssGP Zaire ebolavirus.	AJP14859.1	760243037	297	Sierra Leone: western urban	06-Nov-2014	Ebolavirus/H.sapiens-wt/SLE/2014/Makona-J0150
sGP Zaire ebolavirus.	AJP14858.1	760243036	364	Sierra Leone: western urban	06-Nov-2014	Ebolavirus/H.sapiens-wt/SLE/2014/Makona-J0150
virion spike glycoprotein precursor Zaire ebolavirus.	AJP14857.1	760243035	676	Sierra Leone: western urban	06-Nov-2014	Ebolavirus/H.sapiens-wt/SLE/2014/Makona-J0150
ssGP Zaire ebolavirus.	AJP14850.1	760243026	297	Sierra Leone: western urban	07-Nov-2014	Ebolavirus/H.sapiens-wt/SLE/2014/Makona-J0149
sGP Zaire ebolavirus.	AJP14849.1	760243025	364	Sierra Leone: western urban	07-Nov-2014	Ebolavirus/H.sapiens-wt/SLE/2014/Makona-J0149
virion spike glycoprotein precursor Zaire ebolavirus.	AJP14848.1	760243024	676	Sierra Leone: western urban	07-Nov-2014	Ebolavirus/H.sapiens-wt/SLE/2014/Makona-J0149
ssGP Zaire ebolavirus.	AJP14841.1	760243014	297	Sierra Leone: Port Loko	03-Oct-2014	Ebolavirus/H.sapiens-wt/SLE/2014/Makona-J0036
sGP Zaire ebolavirus.	AJP14840.1	760243013	364	Sierra Leone: Port Loko	03-Oct-2014	Ebolavirus/H.sapiens-wt/SLE/2014/Makona-J0036
virion spike glycoprotein precursor Zaire ebolavirus.	AJP14839.1	760243012	676	Sierra Leone: Port Loko	03-Oct-2014	Ebolavirus/H.sapiens-wt/SLE/2014/Makona-J0036
ssGP Zaire ebolavirus.	AJP14832.1	760243003	297	Sierra Leone: western rural	06-Nov-2014	Ebolavirus/H.sapiens-wt/SLE/2014/Makona-J0145
sGP Zaire ebolavirus.	AJP14831.1	760243002	364	Sierra Leone: western rural	06-Nov-2014	Ebolavirus/H.sapiens-wt/SLE/2014/Makona-J0145
virion spike glycoprotein precursor Zaire ebolavirus.	AJP14830.1	760243001	676	Sierra Leone: western rural	06-Nov-2014	Ebolavirus/H.sapiens-wt/SLE/2014/Makona-J0145
ssGP Zaire ebolavirus.	AJP14823.1	760242991	297	Sierra Leone: Port Loko	03-Oct-2014	Ebolavirus/H.sapiens-wt/SLE/2014/Makona-J0033
sGP Zaire ebolavirus.	AJP14822.1	760242990	364	Sierra Leone: Port Loko	03-Oct-2014	Ebolavirus/H.sapiens-wt/SLE/2014/Makona-J0033
virion spike glycoprotein precursor Zaire ebolavirus.	AJP14821.1	760242989	676	Sierra Leone: Port Loko	03-Oct-2014	Ebolavirus/H.sapiens-wt/SLE/2014/Makona-J0033
ssGP Zaire ebolavirus.	AJP14814.1	760242973	297	Sierra Leone: Port Loko	30-Sep-2014	Ebolavirus/H.sapiens-wt/SLE/2014/Makona-J0032
sGP Zaire ebolavirus.	AJP14813.1	760242972	364	Sierra Leone: Port Loko	30-Sep-2014	Ebolavirus/H.sapiens-wt/SLE/2014/Makona-J0032
virion spike glycoprotein precursor Zaire ebolavirus.	AJP14812.1	760242971	676	Sierra Leone: Port Loko	30-Sep-2014	Ebolavirus/H.sapiens-wt/SLE/2014/Makona-J0032
ssGP Zaire ebolavirus.	AJP14805.1	760242961	297	Sierra Leone: western urban	03-Nov-2014	Ebolavirus/H.sapiens-wt/SLE/2014/Makona-J0142
sGP Zaire ebolavirus.	AJP14804.1	760242960	364	Sierra Leone: western urban	03-Nov-2014	Ebolavirus/H.sapiens-wt/SLE/2014/Makona-J0142
virion spike glycoprotein precursor Zaire ebolavirus.	AJP14803.1	760242959	676	Sierra Leone: western urban	03-Nov-2014	Ebolavirus/H.sapiens-wt/SLE/2014/Makona-J0142
ssGP Zaire ebolavirus.	AJP14796.1	760242944	297	Sierra Leone: western rural	04-Nov-2014	Ebolavirus/H.sapiens-wt/SLE/2014/Makona-J0141
sGP Zaire ebolavirus.	AJP14795.1	760242943	364	Sierra Leone: western rural	04-Nov-2014	Ebolavirus/H.sapiens-wt/SLE/2014/Makona-J0141
virion spike glycoprotein precursor Zaire ebolavirus.	AJP14794.1	760242942	676	Sierra Leone: western rural	04-Nov-2014	Ebolavirus/H.sapiens-wt/SLE/2014/Makona-J0141
ssGP Zaire ebolavirus.	AJP14787.1	760242932	297	Sierra Leone: Port Loko	29-Sep-2014	Ebolavirus/H.sapiens-wt/SLE/2014/Makona-J0029
sGP Zaire ebolavirus.	AJP14786.1	760242931	364	Sierra Leone: Port Loko	29-Sep-2014	Ebolavirus/H.sapiens-wt/SLE/2014/Makona-J0029
virion spike glycoprotein precursor Zaire ebolavirus.	AJP14785.1	760242930	676	Sierra Leone: Port Loko	29-Sep-2014	Ebolavirus/H.sapiens-wt/SLE/2014/Makona-J0029
ssGP Zaire ebolavirus.	AJP14778.1	760242920	297	Sierra Leone: western urban	30-Oct-2014	Ebolavirus/H.sapiens-wt/SLE/2014/Makona-J0139
sGP Zaire ebolavirus.	AJP14777.1	760242919	364	Sierra Leone: western urban	30-Oct-2014	Ebolavirus/H.sapiens-wt/SLE/2014/Makona-J0139
virion spike glycoprotein precursor Zaire ebolavirus.	AJP14776.1	760242918	676	Sierra Leone: western urban	30-Oct-2014	Ebolavirus/H.sapiens-wt/SLE/2014/Makona-J0139
ssGP Zaire ebolavirus.	AJP14769.1	760242908	297	Sierra Leone: western urban	01-Nov-2014	Ebolavirus/H.sapiens-wt/SLE/2014/Makona-J0138
sGP Zaire ebolavirus.	AJP14768.1	760242907	364	Sierra Leone: western urban	01-Nov-2014	Ebolavirus/H.sapiens-wt/SLE/2014/Makona-J0138
virion spike glycoprotein precursor Zaire ebolavirus.	AJP14767.1	760242906	676	Sierra Leone: western urban	01-Nov-2014	Ebolavirus/H.sapiens-wt/SLE/2014/Makona-J0138
ssGP Zaire ebolavirus.	AJP14760.1	760242896	297	Sierra Leone: western rural	01-Nov-2014	Ebolavirus/H.sapiens-wt/SLE/2014/Makona-J0137
sGP Zaire ebolavirus.	AJP14759.1	760242895	364	Sierra Leone: western rural	01-Nov-2014	Ebolavirus/H.sapiens-wt/SLE/2014/Makona-J0137
virion spike glycoprotein precursor Zaire ebolavirus.	AJP14758.1	760242894	676	Sierra Leone: western rural	01-Nov-2014	Ebolavirus/H.sapiens-wt/SLE/2014/Makona-J0137
ssGP Zaire ebolavirus.	AJP14751.1	760242884	297	Sierra Leone: western rural	01-Nov-2014	Ebolavirus/H.sapiens-wt/SLE/2014/Makona-J0136
sGP Zaire ebolavirus.	AJP14750.1	760242883	364	Sierra Leone: western rural	01-Nov-2014	Ebolavirus/H.sapiens-wt/SLE/2014/Makona-J0136
virion spike glycoprotein precursor Zaire ebolavirus.	AJP14749.1	760242882	676	Sierra Leone: western rural	01-Nov-2014	Ebolavirus/H.sapiens-wt/SLE/2014/Makona-J0136
ssGP Zaire ebolavirus.	AJP14742.1	760242873	297	Sierra Leone: Bombali	02-Oct-2014	Ebolavirus/H.sapiens-wt/SLE/2014/Makona-J0028
sGP Zaire ebolavirus.	AJP14741.1	760242872	364	Sierra Leone: Bombali	02-Oct-2014	Ebolavirus/H.sapiens-wt/SLE/2014/Makona-J0028
virion spike glycoprotein precursor Zaire ebolavirus.	AJP14740.1	760242871	676	Sierra Leone: Bombali	02-Oct-2014	Ebolavirus/H.sapiens-wt/SLE/2014/Makona-J0028
ssGP Zaire ebolavirus.	AJP14733.1	760242862	297	Sierra Leone: western rural	31-Oct-2014	Ebolavirus/H.sapiens-wt/SLE/2014/Makona-J0134
sGP Zaire ebolavirus.	AJP14732.1	760242861	364	Sierra Leone: western rural	31-Oct-2014	Ebolavirus/H.sapiens-wt/SLE/2014/Makona-J0134
virion spike glycoprotein precursor Zaire ebolavirus.	AJP14731.1	760242860	676	Sierra Leone: western rural	31-Oct-2014	Ebolavirus/H.sapiens-wt/SLE/2014/Makona-J0134
ssGP Zaire ebolavirus.	AJP14724.1	760242850	297	Sierra Leone: western rural	31-Oct-2014	Ebolavirus/H.sapiens-wt/SLE/2014/Makona-J0133
sGP Zaire ebolavirus.	AJP14723.1	760242849	364	Sierra Leone: western rural	31-Oct-2014	Ebolavirus/H.sapiens-wt/SLE/2014/Makona-J0133
virion spike glycoprotein precursor Zaire ebolavirus.	AJP14722.1	760242848	676	Sierra Leone: western rural	31-Oct-2014	Ebolavirus/H.sapiens-wt/SLE/2014/Makona-J0133
ssGP Zaire ebolavirus.	AJP14715.1	760242838	297	Sierra Leone: Port Loko	30-Oct-2014	Ebolavirus/H.sapiens-wt/SLE/2014/Makona-J0131
sGP Zaire ebolavirus.	AJP14714.1	760242837	364	Sierra Leone: Port Loko	30-Oct-2014	Ebolavirus/H.sapiens-wt/SLE/2014/Makona-J0131
virion spike glycoprotein precursor Zaire ebolavirus.	AJP14713.1	760242836	676	Sierra Leone: Port Loko	30-Oct-2014	Ebolavirus/H.sapiens-wt/SLE/2014/Makona-J0131
ssGP Zaire ebolavirus.	AJP14706.1	760242819	297	Sierra Leone: Port Loko	02-Nov-2014	Ebolavirus/H.sapiens-wt/SLE/2014/Makona-J0130
sGP Zaire ebolavirus.	AJP14705.1	760242818	364	Sierra Leone: Port Loko	02-Nov-2014	Ebolavirus/H.sapiens-wt/SLE/2014/Makona-J0130
virion spike glycoprotein precursor Zaire ebolavirus.	AJP14704.1	760242817	676	Sierra Leone: Port Loko	02-Nov-2014	Ebolavirus/H.sapiens-wt/SLE/2014/Makona-J0130
ssGP Zaire ebolavirus.	AJP14697.1	760242807	297	Sierra Leone: Bombali	02-Oct-2014	Ebolavirus/H.sapiens-wt/SLE/2014/Makona-J0027
sGP Zaire ebolavirus.	AJP14696.1	760242806	364	Sierra Leone: Bombali	02-Oct-2014	Ebolavirus/H.sapiens-wt/SLE/2014/Makona-J0027
virion spike glycoprotein precursor Zaire ebolavirus.	AJP14695.1	760242805	676	Sierra Leone: Bombali	02-Oct-2014	Ebolavirus/H.sapiens-wt/SLE/2014/Makona-J0027
ssGP Zaire ebolavirus.	AJP14688.1	760242795	297	Sierra Leone: western urban	31-Oct-2014	Ebolavirus/H.sapiens-wt/SLE/2014/Makona-J0128
sGP Zaire ebolavirus.	AJP14687.1	760242794	364	Sierra Leone: western urban	31-Oct-2014	Ebolavirus/H.sapiens-wt/SLE/2014/Makona-J0128
virion spike glycoprotein precursor Zaire ebolavirus.	AJP14686.1	760242793	676	Sierra Leone: western urban	31-Oct-2014	Ebolavirus/H.sapiens-wt/SLE/2014/Makona-J0128
ssGP Zaire ebolavirus.	AJP14679.1	760242783	297	Sierra Leone: western urban	30-Oct-2014	Ebolavirus/H.sapiens-wt/SLE/2014/Makona-J0127
sGP Zaire ebolavirus.	AJP14678.1	760242782	364	Sierra Leone: western urban	30-Oct-2014	Ebolavirus/H.sapiens-wt/SLE/2014/Makona-J0127
virion spike glycoprotein precursor Zaire ebolavirus.	AJP14677.1	760242781	676	Sierra Leone: western urban	30-Oct-2014	Ebolavirus/H.sapiens-wt/SLE/2014/Makona-J0127
ssGP Zaire ebolavirus.	AJP14670.1	760242771	297	Sierra Leone: western rural	31-Oct-2014	Ebolavirus/H.sapiens-wt/SLE/2014/Makona-J0126
sGP Zaire ebolavirus.	AJP14669.1	760242770	364	Sierra Leone: western rural	31-Oct-2014	Ebolavirus/H.sapiens-wt/SLE/2014/Makona-J0126
virion spike glycoprotein precursor Zaire ebolavirus.	AJP14668.1	760242769	676	Sierra Leone: western rural	31-Oct-2014	Ebolavirus/H.sapiens-wt/SLE/2014/Makona-J0126
ssGP Zaire ebolavirus.	AJP14661.1	760242759	297	Sierra Leone: western rural	31-Oct-2014	Ebolavirus/H.sapiens-wt/SLE/2014/Makona-J0125
sGP Zaire ebolavirus.	AJP14660.1	760242758	364	Sierra Leone: western rural	31-Oct-2014	Ebolavirus/H.sapiens-wt/SLE/2014/Makona-J0125
virion spike glycoprotein precursor Zaire ebolavirus.	AJP14659.1	760242757	676	Sierra Leone: western rural	31-Oct-2014	Ebolavirus/H.sapiens-wt/SLE/2014/Makona-J0125
ssGP Zaire ebolavirus.	AJP14652.1	760242748	297	Sierra Leone: western area	02-Nov-2014	Ebolavirus/H.sapiens-wt/SLE/2014/Makona-J0124
sGP Zaire ebolavirus.	AJP14651.1	760242747	364	Sierra Leone: western area	02-Nov-2014	Ebolavirus/H.sapiens-wt/SLE/2014/Makona-J0124
virion spike glycoprotein precursor Zaire ebolavirus.	AJP14650.1	760242746	676	Sierra Leone: western area	02-Nov-2014	Ebolavirus/H.sapiens-wt/SLE/2014/Makona-J0124
ssGP Zaire ebolavirus.	AJP14643.1	760242736	297	Sierra Leone: western rural	01-Nov-2014	Ebolavirus/H.sapiens-wt/SLE/2014/Makona-J0123
sGP Zaire ebolavirus.	AJP14642.1	760242735	364	Sierra Leone: western rural	01-Nov-2014	Ebolavirus/H.sapiens-wt/SLE/2014/Makona-J0123
virion spike glycoprotein precursor Zaire ebolavirus.	AJP14641.1	760242734	676	Sierra Leone: western rural	01-Nov-2014	Ebolavirus/H.sapiens-wt/SLE/2014/Makona-J0123
ssGP Zaire ebolavirus.	AJP14634.1	760242724	297	Sierra Leone: western urban	29-Oct-2014	Ebolavirus/H.sapiens-wt/SLE/2014/Makona-J0122
sGP Zaire ebolavirus.	AJP14633.1	760242723	364	Sierra Leone: western urban	29-Oct-2014	Ebolavirus/H.sapiens-wt/SLE/2014/Makona-J0122
virion spike glycoprotein precursor Zaire ebolavirus.	AJP14632.1	760242722	676	Sierra Leone: western urban	29-Oct-2014	Ebolavirus/H.sapiens-wt/SLE/2014/Makona-J0122
ssGP Zaire ebolavirus.	AJP14625.1	760242712	297	Sierra Leone: Bombali	02-Oct-2014	Ebolavirus/H.sapiens-wt/SLE/2014/Makona-J0026
sGP Zaire ebolavirus.	AJP14624.1	760242711	364	Sierra Leone: Bombali	02-Oct-2014	Ebolavirus/H.sapiens-wt/SLE/2014/Makona-J0026
virion spike glycoprotein precursor Zaire ebolavirus.	AJP14623.1	760242710	676	Sierra Leone: Bombali	02-Oct-2014	Ebolavirus/H.sapiens-wt/SLE/2014/Makona-J0026
ssGP Zaire ebolavirus.	AJP14616.1	760242700	297	Sierra Leone: western urban	29-Oct-2014	Ebolavirus/H.sapiens-wt/SLE/2014/Makona-J0121
sGP Zaire ebolavirus.	AJP14615.1	760242699	364	Sierra Leone: western urban	29-Oct-2014	Ebolavirus/H.sapiens-wt/SLE/2014/Makona-J0121
virion spike glycoprotein precursor Zaire ebolavirus.	AJP14614.1	760242698	676	Sierra Leone: western urban	29-Oct-2014	Ebolavirus/H.sapiens-wt/SLE/2014/Makona-J0121
ssGP Zaire ebolavirus.	AJP14607.1	760242688	297	Sierra Leone: western rural	28-Sep-2014	Ebolavirus/H.sapiens-wt/SLE/2014/Makona-J0004
sGP Zaire ebolavirus.	AJP14606.1	760242687	364	Sierra Leone: western rural	28-Sep-2014	Ebolavirus/H.sapiens-wt/SLE/2014/Makona-J0004
virion spike glycoprotein precursor Zaire ebolavirus.	AJP14605.1	760242686	676	Sierra Leone: western rural	28-Sep-2014	Ebolavirus/H.sapiens-wt/SLE/2014/Makona-J0004
ssGP Zaire ebolavirus.	AJP14598.1	760242676	297	Sierra Leone: western urban	30-Oct-2014	Ebolavirus/H.sapiens-wt/SLE/2014/Makona-J0119
sGP Zaire ebolavirus.	AJP14597.1	760242675	364	Sierra Leone: western urban	30-Oct-2014	Ebolavirus/H.sapiens-wt/SLE/2014/Makona-J0119
virion spike glycoprotein precursor Zaire ebolavirus.	AJP14596.1	760242674	676	Sierra Leone: western urban	30-Oct-2014	Ebolavirus/H.sapiens-wt/SLE/2014/Makona-J0119
ssGP Zaire ebolavirus.	AJP14589.1	760242664	297	Sierra Leone: western rural	02-Oct-2014	Ebolavirus/H.sapiens-wt/SLE/2014/Makona-J0025
sGP Zaire ebolavirus.	AJP14588.1	760242663	364	Sierra Leone: western rural	02-Oct-2014	Ebolavirus/H.sapiens-wt/SLE/2014/Makona-J0025
virion spike glycoprotein precursor Zaire ebolavirus.	AJP14587.1	760242662	676	Sierra Leone: western rural	02-Oct-2014	Ebolavirus/H.sapiens-wt/SLE/2014/Makona-J0025
ssGP Zaire ebolavirus.	AJP14580.1	760242653	297	Sierra Leone: western rural	31-Oct-2014	Ebolavirus/H.sapiens-wt/SLE/2014/Makona-J0117
sGP Zaire ebolavirus.	AJP14579.1	760242652	364	Sierra Leone: western rural	31-Oct-2014	Ebolavirus/H.sapiens-wt/SLE/2014/Makona-J0117
virion spike glycoprotein precursor Zaire ebolavirus.	AJP14578.1	760242651	676	Sierra Leone: western rural	31-Oct-2014	Ebolavirus/H.sapiens-wt/SLE/2014/Makona-J0117
ssGP Zaire ebolavirus.	AJP14571.1	760242641	297	Sierra Leone: western rural	30-Oct-2014	Ebolavirus/H.sapiens-wt/SLE/2014/Makona-J0116
sGP Zaire ebolavirus.	AJP14570.1	760242640	364	Sierra Leone: western rural	30-Oct-2014	Ebolavirus/H.sapiens-wt/SLE/2014/Makona-J0116
virion spike glycoprotein precursor Zaire ebolavirus.	AJP14569.1	760242639	676	Sierra Leone: western rural	30-Oct-2014	Ebolavirus/H.sapiens-wt/SLE/2014/Makona-J0116
ssGP Zaire ebolavirus.	AJP14562.1	760242629	297	Sierra Leone: western rural	29-Sep-2014	Ebolavirus/H.sapiens-wt/SLE/2014/Makona-J0024
sGP Zaire ebolavirus.	AJP14561.1	760242628	364	Sierra Leone: western rural	29-Sep-2014	Ebolavirus/H.sapiens-wt/SLE/2014/Makona-J0024
virion spike glycoprotein precursor Zaire ebolavirus.	AJP14560.1	760242627	676	Sierra Leone: western rural	29-Sep-2014	Ebolavirus/H.sapiens-wt/SLE/2014/Makona-J0024
ssGP Zaire ebolavirus.	AJP14553.1	760242617	297	Sierra Leone: western urban	30-Oct-2014	Ebolavirus/H.sapiens-wt/SLE/2014/Makona-J0113
sGP Zaire ebolavirus.	AJP14552.1	760242616	364	Sierra Leone: western urban	30-Oct-2014	Ebolavirus/H.sapiens-wt/SLE/2014/Makona-J0113
virion spike glycoprotein precursor Zaire ebolavirus.	AJP14551.1	760242615	676	Sierra Leone: western urban	30-Oct-2014	Ebolavirus/H.sapiens-wt/SLE/2014/Makona-J0113
ssGP Zaire ebolavirus.	AJP14544.1	760242606	297	Sierra Leone: western area	31-Oct-2014	Ebolavirus/H.sapiens-wt/SLE/2014/Makona-J0112
sGP Zaire ebolavirus.	AJP14543.1	760242605	364	Sierra Leone: western area	31-Oct-2014	Ebolavirus/H.sapiens-wt/SLE/2014/Makona-J0112
virion spike glycoprotein precursor Zaire ebolavirus.	AJP14542.1	760242604	676	Sierra Leone: western area	31-Oct-2014	Ebolavirus/H.sapiens-wt/SLE/2014/Makona-J0112
ssGP Zaire ebolavirus.	AJP14535.1	760242596	297	Sierra Leone: western urban	31-Oct-2014	Ebolavirus/H.sapiens-wt/SLE/2014/Makona-J0110
sGP Zaire ebolavirus.	AJP14534.1	760242595	364	Sierra Leone: western urban	31-Oct-2014	Ebolavirus/H.sapiens-wt/SLE/2014/Makona-J0110
virion spike glycoprotein precursor Zaire ebolavirus.	AJP14533.1	760242594	676	Sierra Leone: western urban	31-Oct-2014	Ebolavirus/H.sapiens-wt/SLE/2014/Makona-J0110
ssGP Zaire ebolavirus.	AJP14526.1	760242586	297	Sierra Leone: western rural	28-Oct-2014	Ebolavirus/H.sapiens-wt/SLE/2014/Makona-J0108
sGP Zaire ebolavirus.	AJP14525.1	760242585	364	Sierra Leone: western rural	28-Oct-2014	Ebolavirus/H.sapiens-wt/SLE/2014/Makona-J0108
virion spike glycoprotein precursor Zaire ebolavirus.	AJP14524.1	760242584	676	Sierra Leone: western rural	28-Oct-2014	Ebolavirus/H.sapiens-wt/SLE/2014/Makona-J0108
ssGP Zaire ebolavirus.	AJP14517.1	760242576	297	Sierra Leone: Port Loko	29-Oct-2014	Ebolavirus/H.sapiens-wt/SLE/2014/Makona-J0103
sGP Zaire ebolavirus.	AJP14516.1	760242575	364	Sierra Leone: Port Loko	29-Oct-2014	Ebolavirus/H.sapiens-wt/SLE/2014/Makona-J0103
virion spike glycoprotein precursor Zaire ebolavirus.	AJP14515.1	760242574	676	Sierra Leone: Port Loko	29-Oct-2014	Ebolavirus/H.sapiens-wt/SLE/2014/Makona-J0103
ssGP Zaire ebolavirus.	AJP14508.1	760242564	297	Sierra Leone: Port Loko	27-Oct-2014	Ebolavirus/H.sapiens-wt/SLE/2014/Makona-J0102
sGP Zaire ebolavirus.	AJP14507.1	760242563	364	Sierra Leone: Port Loko	27-Oct-2014	Ebolavirus/H.sapiens-wt/SLE/2014/Makona-J0102
virion spike glycoprotein precursor Zaire ebolavirus.	AJP14506.1	760242562	676	Sierra Leone: Port Loko	27-Oct-2014	Ebolavirus/H.sapiens-wt/SLE/2014/Makona-J0102
ssGP Zaire ebolavirus.	AJP14499.1	760242552	297	Sierra Leone: Port Loko	29-Oct-2014	Ebolavirus/H.sapiens-wt/SLE/2014/Makona-J0101
sGP Zaire ebolavirus.	AJP14498.1	760242551	364	Sierra Leone: Port Loko	29-Oct-2014	Ebolavirus/H.sapiens-wt/SLE/2014/Makona-J0101
virion spike glycoprotein precursor Zaire ebolavirus.	AJP14497.1	760242550	676	Sierra Leone: Port Loko	29-Oct-2014	Ebolavirus/H.sapiens-wt/SLE/2014/Makona-J0101
ssGP Zaire ebolavirus.	AJP14490.1	760242541	297	Sierra Leone: Kambia	26-Oct-2014	Ebolavirus/H.sapiens-wt/SLE/2014/Makona-J0100
sGP Zaire ebolavirus.	AJP14489.1	760242540	364	Sierra Leone: Kambia	26-Oct-2014	Ebolavirus/H.sapiens-wt/SLE/2014/Makona-J0100
virion spike glycoprotein precursor Zaire ebolavirus.	AJP14488.1	760242539	676	Sierra Leone: Kambia	26-Oct-2014	Ebolavirus/H.sapiens-wt/SLE/2014/Makona-J0100
ssGP Zaire ebolavirus.	AJP14481.1	760242529	297	Sierra Leone: western urban	27-Oct-2014	Ebolavirus/H.sapiens-wt/SLE/2014/Makona-J0096
sGP Zaire ebolavirus.	AJP14480.1	760242528	364	Sierra Leone: western urban	27-Oct-2014	Ebolavirus/H.sapiens-wt/SLE/2014/Makona-J0096
virion spike glycoprotein precursor Zaire ebolavirus.	AJP14479.1	760242527	676	Sierra Leone: western urban	27-Oct-2014	Ebolavirus/H.sapiens-wt/SLE/2014/Makona-J0096
ssGP Zaire ebolavirus.	AJP14472.1	760242517	297	Sierra Leone: western urban	27-Oct-2014	Ebolavirus/H.sapiens-wt/SLE/2014/Makona-J0095
sGP Zaire ebolavirus.	AJP14471.1	760242516	364	Sierra Leone: western urban	27-Oct-2014	Ebolavirus/H.sapiens-wt/SLE/2014/Makona-J0095
virion spike glycoprotein precursor Zaire ebolavirus.	AJP14470.1	760242515	676	Sierra Leone: western urban	27-Oct-2014	Ebolavirus/H.sapiens-wt/SLE/2014/Makona-J0095
ssGP Zaire ebolavirus.	AJP14463.1	760242505	297	Sierra Leone: western rural	01-Oct-2014	Ebolavirus/H.sapiens-wt/SLE/2014/Makona-J0023
sGP Zaire ebolavirus.	AJP14462.1	760242504	364	Sierra Leone: western rural	01-Oct-2014	Ebolavirus/H.sapiens-wt/SLE/2014/Makona-J0023
virion spike glycoprotein precursor Zaire ebolavirus.	AJP14461.1	760242503	676	Sierra Leone: western rural	01-Oct-2014	Ebolavirus/H.sapiens-wt/SLE/2014/Makona-J0023
ssGP Zaire ebolavirus.	AJP14454.1	760242493	297	Sierra Leone: Port Loko	28-Sep-2014	Ebolavirus/H.sapiens-wt/SLE/2014/Makona-J0003
sGP Zaire ebolavirus.	AJP14453.1	760242492	364	Sierra Leone: Port Loko	28-Sep-2014	Ebolavirus/H.sapiens-wt/SLE/2014/Makona-J0003
virion spike glycoprotein precursor Zaire ebolavirus.	AJP14452.1	760242491	676	Sierra Leone: Port Loko	28-Sep-2014	Ebolavirus/H.sapiens-wt/SLE/2014/Makona-J0003
ssGP Zaire ebolavirus.	AJP14445.1	760242481	297	Sierra Leone: western rural	25-Oct-2014	Ebolavirus/H.sapiens-wt/SLE/2014/Makona-J0092
sGP Zaire ebolavirus.	AJP14444.1	760242480	364	Sierra Leone: western rural	25-Oct-2014	Ebolavirus/H.sapiens-wt/SLE/2014/Makona-J0092
virion spike glycoprotein precursor Zaire ebolavirus.	AJP14443.1	760242479	676	Sierra Leone: western rural	25-Oct-2014	Ebolavirus/H.sapiens-wt/SLE/2014/Makona-J0092
ssGP Zaire ebolavirus.	AJP14436.1	760242470	297	Sierra Leone: western urban	23-Oct-2014	Ebolavirus/H.sapiens-wt/SLE/2014/Makona-J0090
sGP Zaire ebolavirus.	AJP14435.1	760242469	364	Sierra Leone: western urban	23-Oct-2014	Ebolavirus/H.sapiens-wt/SLE/2014/Makona-J0090
virion spike glycoprotein precursor Zaire ebolavirus.	AJP14434.1	760242468	676	Sierra Leone: western urban	23-Oct-2014	Ebolavirus/H.sapiens-wt/SLE/2014/Makona-J0090
ssGP Zaire ebolavirus.	AJP14427.1	760242460	297	Sierra Leone: Port Loko	20-Oct-2014	Ebolavirus/H.sapiens-wt/SLE/2014/Makona-J0088
sGP Zaire ebolavirus.	AJP14426.1	760242459	364	Sierra Leone: Port Loko	20-Oct-2014	Ebolavirus/H.sapiens-wt/SLE/2014/Makona-J0088
virion spike glycoprotein precursor Zaire ebolavirus.	AJP14425.1	760242458	676	Sierra Leone: Port Loko	20-Oct-2014	Ebolavirus/H.sapiens-wt/SLE/2014/Makona-J0088
ssGP Zaire ebolavirus.	AJP14418.1	760242450	297	Sierra Leone: Port Loko	23-Oct-2014	Ebolavirus/H.sapiens-wt/SLE/2014/Makona-J0087
sGP Zaire ebolavirus.	AJP14417.1	760242449	364	Sierra Leone: Port Loko	23-Oct-2014	Ebolavirus/H.sapiens-wt/SLE/2014/Makona-J0087
virion spike glycoprotein precursor Zaire ebolavirus.	AJP14416.1	760242448	676	Sierra Leone: Port Loko	23-Oct-2014	Ebolavirus/H.sapiens-wt/SLE/2014/Makona-J0087
ssGP Zaire ebolavirus.	AJP14401.1	760242428	297	Sierra Leone: Port Loko	17-Oct-2014	Ebolavirus/H.sapiens-wt/SLE/2014/Makona-J0085
sGP Zaire ebolavirus.	AJP14400.1	760242427	364	Sierra Leone: Port Loko	17-Oct-2014	Ebolavirus/H.sapiens-wt/SLE/2014/Makona-J0085
virion spike glycoprotein precursor Zaire ebolavirus.	AJP14399.1	760242426	676	Sierra Leone: Port Loko	17-Oct-2014	Ebolavirus/H.sapiens-wt/SLE/2014/Makona-J0085
ssGP Zaire ebolavirus.	AJP14392.1	760242417	297	Sierra Leone: western rural	30-Sep-2014	Ebolavirus/H.sapiens-wt/SLE/2014/Makona-J0018
sGP Zaire ebolavirus.	AJP14391.1	760242416	364	Sierra Leone: western rural	30-Sep-2014	Ebolavirus/H.sapiens-wt/SLE/2014/Makona-J0018
virion spike glycoprotein precursor Zaire ebolavirus.	AJP14390.1	760242415	676	Sierra Leone: western rural	30-Sep-2014	Ebolavirus/H.sapiens-wt/SLE/2014/Makona-J0018
ssGP Zaire ebolavirus.	AJP14383.1	760242405	297	Sierra Leone: Port Loko	28-Sep-2014	Ebolavirus/H.sapiens-wt/SLE/2014/Makona-J0013
sGP Zaire ebolavirus.	AJP14382.1	760242404	364	Sierra Leone: Port Loko	28-Sep-2014	Ebolavirus/H.sapiens-wt/SLE/2014/Makona-J0013
virion spike glycoprotein precursor Zaire ebolavirus.	AJP14381.1	760242403	676	Sierra Leone: Port Loko	28-Sep-2014	Ebolavirus/H.sapiens-wt/SLE/2014/Makona-J0013
ssGP Zaire ebolavirus.	AJP14374.1	760242393	297	Sierra Leone: Port Loko	29-Sep-2014	Ebolavirus/H.sapiens-wt/SLE/2014/Makona-J0012
sGP Zaire ebolavirus.	AJP14373.1	760242392	364	Sierra Leone: Port Loko	29-Sep-2014	Ebolavirus/H.sapiens-wt/SLE/2014/Makona-J0012
virion spike glycoprotein precursor Zaire ebolavirus.	AJP14372.1	760242391	676	Sierra Leone: Port Loko	29-Sep-2014	Ebolavirus/H.sapiens-wt/SLE/2014/Makona-J0012
ssGP Zaire ebolavirus.	AJP14365.1	760242381	297	Sierra Leone: Port Loko	29-Sep-2014	Ebolavirus/H.sapiens-wt/SLE/2014/Makona-J0011
sGP Zaire ebolavirus.	AJP14364.1	760242380	364	Sierra Leone: Port Loko	29-Sep-2014	Ebolavirus/H.sapiens-wt/SLE/2014/Makona-J0011
virion spike glycoprotein precursor Zaire ebolavirus.	AJP14363.1	760242379	676	Sierra Leone: Port Loko	29-Sep-2014	Ebolavirus/H.sapiens-wt/SLE/2014/Makona-J0011
ssGP Zaire ebolavirus.	AJP14356.1	760242369	297	Sierra Leone: western urban	27-Sep-2014	Ebolavirus/H.sapiens-wt/SLE/2014/Makona-J0002
sGP Zaire ebolavirus.	AJP14355.1	760242368	364	Sierra Leone: western urban	27-Sep-2014	Ebolavirus/H.sapiens-wt/SLE/2014/Makona-J0002
[truncated: 1,962 more rows]

## Sheet: only_GP_length_constraints
description	accession#	gi	length	country	collection_date	isolate
GP [Zaire ebolavirus].	ALT19587.1	965569718	681	N/A	N/A	['Ebola virus/H.sapiens-rec/COD/1976/Yambuku-Mayinga-eGFP-MARV_GP']
RecName: Full=Envelope glycoprotein; AltName: Full=GP1,2; Short=GP; Contains: RecName: Full=GP1; Contains: RecName: Full=GP2; Contains: RecName: Full=GP2-delta; Flags: Precursor.	Q91DD8.1	81961763	677	N/A	N/A	N/A
RecName: Full=Envelope glycoprotein; AltName: Full=GP1,2; Short=GP; Contains: RecName: Full=GP1; Contains: RecName: Full=GP2; Contains: RecName: Full=GP2-delta; Flags: Precursor.	Q89853.1	8479518	677	N/A	N/A	N/A
RecName: Full=Envelope glycoprotein; AltName: Full=GP1,2; Short=GP; Contains: RecName: Full=GP1; Contains: RecName: Full=GP2; Contains: RecName: Full=GP2-delta; Flags: Precursor.	Q66799.1	8479511	677	N/A	N/A	N/A
spike glycoprotein [Reston ebolavirus].	NP_690583.1	22789230	677	N/A	N/A	['Reston virus/M.fascicularis-tc/USA/1989/Philippines89- Pennsylvania']
structural glycoprotein [Reston ebolavirus].	AGC02898.1	440385035	677	['USA: Texas']	['1996']	['RESTV/M.fascicularis-tc/PHL-USA/1996/Ferlite, Philippines/Alice, TX']
structural glycoprotein [Reston ebolavirus].	AGC02890.1	440385026	677	['Philippines']	['2009']	['RESTV/Sus-wt/PHL/2009/09A Farm A']
virion spike glycoprotein precursor [Reston ebolavirus].	AAC24346.1	3253216	677	N/A	N/A	['Pennsylvania']
structural glycoprotein [Reston ebolavirus].	AAN04455.1	22671631	677	N/A	N/A	N/A
virion spike glycoprotein [Reston ebolavirus].	AAC54891.1	1041211	677	N/A	N/A	N/A
virion spike glycoprotein [Reston ebolavirus].	AAC54889.1	1041208	677	N/A	N/A	N/A
virion spike glycoprotein [Reston ebolavirus].	AAC54885.1	1041202	677	N/A	N/A	N/A
structural surface glycoprotein [Reston ebolavirus].	AAV48577.1	55247459	677	N/A	N/A	N/A
structural glycoprotein [Reston ebolavirus - Reston].	ACT22802.1	253317740	677	['Philippines']	['2008']	N/A
structural glycoprotein [Reston ebolavirus - Reston].	ACT22794.1	253317731	677	['Philippines']	['2008']	N/A
structural glycoprotein [Reston ebolavirus - Reston].	ACT22787.1	253317723	677	['Philippines']	['2008']	N/A
virion spike glycoprotein precursor [Reston ebolavirus - Reston].	BAB69006.1	15823612	677	N/A	N/A	N/A
surface glycoprotein GP [Zaire ebolavirus].	AAN37507.1	23630486	676	N/A	N/A	N/A
surface glycoprotein GP precursor [Zaire ebolavirus].	AAM76034.1	21702651	676	N/A	N/A	N/A
surface glycoprotein GP [Zaire ebolavirus].	AAG40168.1	11761750	676	N/A	N/A	N/A
RecName: Full=Envelope glycoprotein; AltName: Full=GP1,2; Short=GP; Contains: RecName: Full=GP1; Contains: RecName: Full=GP2; Contains: RecName: Full=GP2-delta; Flags: Precursor.	Q7T9D9.1	75559166	676	N/A	N/A	N/A
RecName: Full=Envelope glycoprotein; AltName: Full=GP1,2; Short=GP; Contains: RecName: Full=GP1; Contains: RecName: Full=GP2; Contains: RecName: Full=GP2-delta; Flags: Precursor.	Q66814.1	8479515	676	N/A	N/A	N/A
RecName: Full=Envelope glycoprotein; AltName: Full=GP1,2; Short=GP; Contains: RecName: Full=GP1; Contains: RecName: Full=GP2; Contains: RecName: Full=GP2-delta; Flags: Precursor.	Q66810.1	8479513	676	N/A	N/A	N/A
RecName: Full=Envelope glycoprotein; AltName: Full=GP1,2; Short=GP; Contains: RecName: Full=GP1; Contains: RecName: Full=GP2; Contains: RecName: Full=GP2-delta; Flags: Precursor.	Q66798.1	8479509	676	N/A	N/A	N/A
RecName: Full=Envelope glycoprotein; AltName: Full=GP1,2; Short=GP; Contains: RecName: Full=GP1; Contains: RecName: Full=GP2; Contains: RecName: Full=GP2-delta; Flags: Precursor.	P87671.1	8479505	676	N/A	N/A	N/A
RecName: Full=Envelope glycoprotein; AltName: Full=GP1,2; Short=GP; Contains: RecName: Full=GP1; Contains: RecName: Full=GP2; Contains: RecName: Full=GP2-delta; Flags: Precursor.	P87666.1	8479503	676	N/A	N/A	N/A
RecName: Full=Envelope glycoprotein; AltName: Full=GP1,2; Short=GP; Contains: RecName: Full=GP1; Contains: RecName: Full=GP2; Contains: RecName: Full=GP2-delta; Flags: Precursor.	O11457.1	8479501	676	N/A	N/A	N/A
RecName: Full=Envelope glycoprotein; AltName: Full=GP1,2; Short=GP; Contains: RecName: Full=GP1; Contains: RecName: Full=GP2; Contains: RecName: Full=GP2-delta; Flags: Precursor.	Q05320.1	465411	676	N/A	N/A	N/A
virion spike glycoprotein precursor [Ebola virus].	SCD11534.1	1050758570	676	N/A	N/A	['Ebola virus Makona isolate Frankfurt']
spike glycoprotein precursor [Zaire ebolavirus].	ABW34743.1	158341866	676	['Gabon']	['Nov-2003']	N/A
spike glycoprotein precursor [Zaire ebolavirus].	ABW34742.1	158341864	676	['Gabon']	['May-2005']	N/A
spike glycoprotein precursor [Zaire ebolavirus].	ABW34741.1	158341862	676	['Gabon']	['Feb-2003']	N/A
spike glycoprotein precursor [Zaire ebolavirus].	ABW34740.1	158341860	676	['Gabon']	['Nov-2001']	N/A
spike glycoprotein precursor [Zaire ebolavirus].	ABW34739.1	158341858	676	['Gabon']	['Dec-2002']	N/A
spike glycoprotein precursor [Zaire ebolavirus].	ABW34738.1	158341856	676	['Gabon']	['Dec-2002']	N/A
glycoprotein [Zaire ebolavirus].	AAB81004.1	290392	676	N/A	N/A	N/A
structural glycoprotein [Sudan ebolavirus].	ALL26375.1	942473146	676	['Canada']	['01-Mar-2015']	['Sudan virus/C.porcellus-lab/SSD/1976/Nzara-Boneface']
structural glycoprotein [Sudan ebolavirus].	ALH21228.1	936345350	676	N/A	N/A	['Boniface']
virion spike glycoprotein precursor [Zaire ebolavirus].	ALB07144.1	923091289	676	['Liberia']	['05-Sep-2014']	['Ebola virus H.sapiens-wt/LBR/2015/CDC659']
virion spike glycoprotein precursor [Zaire ebolavirus].	ALB07135.1	923091279	676	['Liberia']	['24-Sep-2014']	['Ebola virus H.sapiens-wt/LBR/2015/CDC1469']
virion spike glycoprotein precursor [Zaire ebolavirus].	ALB07126.1	923091269	676	['Liberia']	['27-Mar-2015']	['Ebola virus H.sapiens-wt/LBR/2015/MH2012684']
virion spike glycoprotein precursor [Zaire ebolavirus].	ALB07117.1	923091259	676	['Liberia']	['20-Mar-2015']	['Ebola virus H.sapiens-wt/LBR/2015/MH13203']
virion spike glycoprotein precursor [Zaire ebolavirus].	AND81233.1	1027251919	676	['Guinea: Kindia']	['18-Apr-2015']	['Ebola virus/H.sapiens/GIN/2015/Makona-Kindia1022']
virion spike glycoprotein precursor [Zaire ebolavirus].	AND81224.1	1027251909	676	['Guinea: Kindia']	['04-Apr-2015']	['Ebola virus/H.sapiens/GIN/2015/Makona-Kindia935']
virion spike glycoprotein precursor [Zaire ebolavirus].	AND81215.1	1027251899	676	['Guinea: Forecaria']	['02-Mar-2015']	['Ebola virus/H.sapiens/GIN/2015/Makona-Forecaria856']
virion spike glycoprotein precursor [Zaire ebolavirus].	AND81206.1	1027251889	676	['Guinea: Kindia']	['23-Dec-2014']	['Ebola virus/H.sapiens/GIN/2014/Makona-Kindia683']
virion spike glycoprotein precursor [Zaire ebolavirus].	AND81197.1	1027251879	676	['Guinea: Kindia']	['04-Nov-2014']	['Ebola virus/H.sapiens/GIN/2014/Makona-Kindia326']
virion spike glycoprotein precursor [Zaire ebolavirus].	AND81188.1	1027251869	676	['Guinea: Conakry']	['02-Nov-2014']	['Ebola virus/H.sapiens/GIN/2014/Makona-Conakry317']
virion spike glycoprotein precursor [Zaire ebolavirus].	AND81090.1	1027251703	676	['Sierra Leone']	['20-Jan-2016']	['Ebola virus/H.sapiens-wt/SLE/2016/Makona-2001_C11_KTO14515']
virion spike glycoprotein precursor [Zaire ebolavirus].	AND81081.1	1027251693	676	['Sierra Leone']	['12-Jan-2016']	['Ebola virus/H.sapiens-wt/SLE/2016/Makona-1601_C12_KT014149']
virion spike glycoprotein precursor [Zaire ebolavirus].	AMY60354.1	1018445885	676	['Nigeria: Lagos']	['22-Jul-2014']	['Ebola virus/H.sapiens-wt/NGA/2014/Makona-E001']
virion spike glycoprotein precursor [Zaire ebolavirus].	AMY60345.1	1018445875	676	['Nigeria: Lagos']	['08-Aug-2014']	['Ebola virus/H.sapiens-wt/NGA/2014/Makona-E039']
virion spike glycoprotein precursor [Zaire ebolavirus].	AMY60336.1	1018445865	676	['Nigeria: Lagos']	['04-Aug-2014']	['Ebola virus/H.sapiens-wt/NGA/2014/Makona-E021']
virion spike glycoprotein precursor [Zaire ebolavirus].	AMY60327.1	1018445855	676	['Nigeria: Lagos']	['06-Aug-2014']	['Ebola virus/H.sapiens-wt/NGA/2014/Makona-E027']
virion spike glycoprotein precursor [Zaire ebolavirus].	AMY60318.1	1018445845	676	['Nigeria: Lagos']	['05-Aug-2014']	['Ebola virus/H.sapiens-wt/NGA/2014/Makona-E023']
virion spike glycoprotein precursor [Zaire ebolavirus].	AMY60309.1	1018445835	676	['Nigeria: Lagos']	['15-Aug-2014']	['Ebola virus/H.sapiens-wt/NGA/2014/Makona-E076']
virion spike glycoprotein precursor [Zaire ebolavirus].	AMY60300.1	1018445825	676	['Nigeria: Port Harcourt']	['01-Sep-2014']	['Ebola virus/H.sapiens-wt/NGA/2014/Makona-E130']
virion spike glycoprotein precursor [Zaire ebolavirus].	AMY60291.1	1018445815	676	['Nigeria: Lagos']	['06-Aug-2014']	['Ebola virus/H.sapiens-wt/NGA/2014/Makona-E030']
virion spike glycoprotein precursor [Zaire ebolavirus].	AMY60282.1	1018445805	676	['Nigeria: Lagos']	['06-Aug-2014']	['Ebola virus/H.sapiens-wt/NGA/2014/Makona-E029']
virion spike glycoprotein precursor [Zaire ebolavirus].	AMY60273.1	1018445795	676	['Nigeria: Lagos']	['04-Aug-2014']	['Ebola virus/H.sapiens-wt/NGA/2014/Makona-E020']
virion spike glycoprotein precursor [Zaire ebolavirus].	AMY60264.1	1018445785	676	['Nigeria: Lagos']	['05-Aug-2014']	['Ebola virus/H.sapiens-wt/NGA/2014/Makona-E024']
virion spike glycoprotein precursor [Zaire ebolavirus].	AMY60255.1	1018445775	676	['Nigeria: Lagos']	['06-Aug-2014']	['Ebola virus/H.sapiens-wt/NGA/2014/Makona-E033']
spike glycoprotein [Bundibugyo ebolavirus].	YP_003815435.1	302371218	676	['Uganda']	['Nov-2007']	['Bundibugyo virus/H.sapiens-tc/UGA/2007/Butalya-811250']
spike glycoprotein [Tai Forest ebolavirus].	YP_003815426.1	302315373	676	["Cote d'Ivoire"]	['Nov-1994']	['Tai Forest virus/H.sapiens-tc/CIV/1994/Pauleoula-CI']
spike glycoprotein [Sudan ebolavirus].	YP_138523.1	55770812	676	['Uganda']	N/A	['Sudan virus/H.sapiens-tc/UGA/2000/Gulu-808892']
spike glycoprotein [Zaire ebolavirus].	NP_066246.1	10313995	676	N/A	N/A	['Ebola virus/H.sapiens-tc/COD/1976/Yambuku-Mayinga']
virion spike glycoprotein precursor [Zaire ebolavirus].	ALT66794.1	968561631	676	['Liberia: Montserrado']	['16-Jan-2015']	['Ebola virus/H.sapiens-wt/LBR/2015/Makona-NIH-4731']
virion spike glycoprotein precursor [Zaire ebolavirus].	ALT66785.1	968561621	676	['Liberia: Montserrado']	['30-Dec-2014']	['Ebola virus/H.sapiens-wt/LBR/2014/Makona-NIH-4547']
virion spike glycoprotein precursor [Zaire ebolavirus].	ALT66776.1	968561611	676	['Liberia: Barclay Farm, Margibi']	['25-Aug-2014']	['Ebola virus/H.sapiens-wt/LBR/2014/Makona-LIBR20006']
virion spike glycoprotein precursor [Zaire ebolavirus].	ALT66767.1	968561601	676	['Liberia: Barclay Farm, Margibi']	['25-Aug-2014']	['Ebola virus/H.sapiens-wt/LBR/2014/Makona-LIBR20005']
virion spike glycoprotein precursor [Zaire ebolavirus].	ALT66758.1	968561591	676	['Liberia: Barclay Farm, Margibi']	['24-Aug-2014']	['Ebola virus/H.sapiens-wt/LBR/2014/Makona-LIBR20004']
virion spike glycoprotein precursor [Zaire ebolavirus].	ALT66749.1	968561581	676	['Liberia: Barclay Farm, Margibi']	['24-Aug-2014']	['Ebola virus/H.sapiens-wt/LBR/2014/Makona-LIBR20003']
virion spike glycoprotein precursor [Zaire ebolavirus].	ALT66740.1	968561571	676	['Liberia: Barclay Farm, Margibi']	['24-Aug-2014']	['Ebola virus/H.sapiens-wt/LBR/2014/Makona-LIBR20002']
virion spike glycoprotein precursor [Zaire ebolavirus].	ALT66731.1	968561561	676	['Liberia: Barclay Farm, Margibi']	['10-Aug-2014']	['Ebola virus/H.sapiens-wt/LBR/2014/Makona-LIBR20001']
virion spike glycoprotein precursor [Zaire ebolavirus].	ALT66722.1	968561551	676	['Liberia: Montserrado']	['12-Jul-2015']	['Ebola virus/H.sapiens-wt/LBR/2015/Makona-LIBR5307']
virion spike glycoprotein precursor [Zaire ebolavirus].	ALT66713.1	968561541	676	['Liberia: Needowein, Margibi']	['08-Jul-2015']	['Ebola virus/H.sapiens-wt/LBR/2015/Makona-LIBR5081']
virion spike glycoprotein precursor [Zaire ebolavirus].	ALT66704.1	968561531	676	['Liberia: Needowein, Margibi']	['07-Jul-2015']	['Ebola virus/H.sapiens-wt/LBR/2015/Makona-LIBR5047']
virion spike glycoprotein precursor [Zaire ebolavirus].	ALT66695.1	968561521	676	['Liberia: Needowein, Margibi']	['07-Jul-2015']	['Ebola virus/H.sapiens-wt/LBR/2015/Makona-LIBR5046']
virion spike glycoprotein precursor [Zaire ebolavirus].	ALT66686.1	968561511	676	['Liberia: Needowein, Margibi']	['02-Jul-2015']	['Ebola virus/H.sapiens-wt/LBR/2015/Makona-LIBR4866']
virion spike glycoprotein precursor [Zaire ebolavirus].	ALT66677.1	968561501	676	['Liberia: Needowein, Margibi']	['01-Jul-2015']	['Ebola virus/H.sapiens-wt/LBR/2015/Makona-LIBR4808']
virion spike glycoprotein precursor [Zaire ebolavirus].	ALT66668.1	968561491	676	['Liberia: Needowein, Margibi']	['30-Jun-2015']	['Ebola virus/H.sapiens-wt/LBR/2015/Makona-LIBR4783']
virion spike glycoprotein precursor [Zaire ebolavirus].	ALT66659.1	968561481	676	['Liberia: Needowein, Margibi']	['29-Jun-2015']	['Ebola virus/H.sapiens-wt/LBR/2015/Makona-LIBR4748']
virion spike glycoprotein precursor [Zaire ebolavirus].	AKA43780.1	788304302	676	['Sierra Leone']	N/A	['Ebola virus/H.sapiens-wt/SLE/2014/Makona-G3864.1']
virion spike glycoprotein precursor [Zaire ebolavirus].	AMT75755.1	1013071506	676	["Liberia: Jallah's Town, Monstserrado"]	['25-Nov-2014']	['Ebola virus/H.sapiens-wt/LBR/2014/Makona-CDC/NIH-3878']
virion spike glycoprotein precursor [Zaire ebolavirus].	AMT75746.1	1013071496	676	['Liberia: Vioja, Monstserrado']	['25-Nov-2014']	['Ebola virus/H.sapiens-wt/LBR/2014/Makona-CDC/NIH-3874']
virion spike glycoprotein precursor [Zaire ebolavirus].	AMT75737.1	1013071486	676	['Liberia: Buchana, Grand Bassa']	['25-Nov-2014']	['Ebola virus/H.sapiens-wt/LBR/2014/Makona-CDC/NIH-3871']
virion spike glycoprotein precursor [Zaire ebolavirus].	AMT75728.1	1013071476	676	['Liberia: Cape Mount']	['23-Nov-2014']	['Ebola virus/H.sapiens-wt/LBR/2014/Makona-CDC/NIH-3832']
virion spike glycoprotein precursor [Zaire ebolavirus].	AMT75719.1	1013071466	676	['Liberia: Bonja, Monstserrado']	['23-Nov-2014']	['Ebola virus/H.sapiens-wt/LBR/2014/Makona-CDC/NIH-3827']
virion spike glycoprotein precursor [Zaire ebolavirus].	AMT75710.1	1013071456	676	['Liberia: Monstserrado']	['19-Nov-2014']	['Ebola virus/H.sapiens-wt/LBR/2014/Makona-CDC/NIH-3762']
virion spike glycoprotein precursor [Zaire ebolavirus].	AMT75701.1	1013071446	676	['Liberia: Monstserrado']	['23-Oct-2014']	['Ebola virus/H.sapiens-wt/LBR/2014/Makona-CDC/NIH-2984']
virion spike glycoprotein precursor [Zaire ebolavirus].	AMT75692.1	1013071436	676	['Liberia: Bensonville, Monstserrado']	['10-Oct-2014']	['Ebola virus/H.sapiens-wt/LBR/2014/Makona-CDC/NIH-2313']
virion spike glycoprotein precursor [Zaire ebolavirus].	AMT75683.1	1013071426	676	['Liberia: St Paul Bridge, Monstserrado']	['10-Oct-2014']	['Ebola virus/H.sapiens-wt/LBR/2014/Makona-CDC/NIH-2303']
virion spike glycoprotein precursor [Zaire ebolavirus].	AMT75674.1	1013071416	676	['Liberia: Margibi']	['27-Sep-2014']	['Ebola virus/H.sapiens-wt/LBR/2014/Makona-CDC/NIH-1650']
virion spike glycoprotein precursor [Zaire ebolavirus].	AMT75665.1	1013071406	676	['Liberia: Margibi']	['16-Sep-2014']	['Ebola virus/H.sapiens-wt/LBR/2014/Makona-CDC/NIH-1122']
virion spike glycoprotein precursor [Zaire ebolavirus].	AMT75656.1	1013071396	676	['Liberia: Redlight, Monstserrado']	['07-Sep-2014']	['Ebola virus/H.sapiens-wt/LBR/2014/Makona-CDC/NIH-710']
virion spike glycoprotein precursor [Zaire ebolavirus].	AMT75647.1	1013071386	676	['Liberia: Battery Factory, Monstserrado']	['07-Sep-2014']	['Ebola virus/H.sapiens-wt/LBR/2014/Makona-CDC/NIH-708']
virion spike glycoprotein precursor [Zaire ebolavirus].	AMT75638.1	1013071376	676	['Liberia: Harbel, Margibi']	['06-Sep-2014']	['Ebola virus/H.sapiens-wt/LBR/2014/Makona-CDC/NIH-686']
virion spike glycoprotein precursor [Zaire ebolavirus].	AMT75629.1	1013071366	676	['Liberia: Soul Clinic, Monstserrado']	['06-Sep-2014']	['Ebola virus/H.sapiens-wt/LBR/2014/Makona-CDC/NIH-683']
virion spike glycoprotein precursor [Zaire ebolavirus].	AMT75620.1	1013071356	676	['Liberia: Monstserrado']	['04-Sep-2014']	['Ebola virus/H.sapiens-wt/LBR/2014/Makona-CDC/NIH-603']
virion spike glycoprotein precursor [Zaire ebolavirus].	AMT75611.1	1013071346	676	['Liberia: Dupont Road, Monstserrado']	['04-Sep-2014']	['Ebola virus/H.sapiens-wt/LBR/2014/Makona-CDC/NIH-595']
virion spike glycoprotein precursor [Zaire ebolavirus].	AMT75602.1	1013071336	676	['Liberia: Monstserrado']	['27-Aug-2014']	['Ebola virus/H.sapiens-wt/LBR/2014/Makona-CDC/NIH-272']
virion spike glycoprotein precursor [Zaire ebolavirus].	AMT75593.1	1013071326	676	['Liberia: Monstserrado']	['27-Aug-2014']	['Ebola virus/H.sapiens-wt/LBR/2014/Makona-CDC/NIH-261']
virion spike glycoprotein precursor [Zaire ebolavirus].	AMT75584.1	1013071316	676	['Liberia: Monstserrado']	['27-Aug-2014']	['Ebola virus/H.sapiens-wt/LBR/2014/Makona-CDC/NIH-259']
virion spike glycoprotein precursor [Zaire ebolavirus].	AMT75575.1	1013071306	676	['Liberia: Monstserrado']	['27-Aug-2014']	['Ebola virus/H.sapiens-wt/LBR/2014/Makona-CDC/NIH-257']
virion spike glycoprotein precursor [Zaire ebolavirus].	AMT75566.1	1013071296	676	['Guinea']	['19-Mar-2014']	['Ebola virus/H.sapiens-tc/GIN/2014/Makona-C05']
virion spike glycoprotein precursor [Zaire ebolavirus].	AMT75557.1	1013071286	676	['Guinea']	['10-Mar-2014']	['Ebola virus/H.sapiens-tc/GIN/2014/Makona-C05']
virion spike glycoprotein precursor [Zaire ebolavirus].	AMT75548.1	1013071276	676	['Guinea']	['10-Mar-2014']	['Ebola virus/H.sapiens-tc/GIN/2014/Makona-C05']
virion spike glycoprotein precursor [Zaire ebolavirus].	ALH21195.1	936345251	676	N/A	N/A	['Ebola virus/H.sapiens-tc/COD/1995/Kikwit-9510621']
virion spike glycoprotein precursor [Zaire ebolavirus].	ALH21186.1	936345220	676	N/A	N/A	['Ebola virus/H.sapiens-tc/COD/1995/Kikwit-9510621']
virion spike glycoprotein precursor [Zaire ebolavirus].	ALD19447.1	926464681	676	['Democratic Republic of the Congo']	['24-Jul-2011']	['Ebola virus/H.sapiens-tc/COD/1995/Kikwit-9510621']
virion spike glycoprotein precursor [Zaire ebolavirus].	ALG02125.1	930628090	676	['Liberia: Gbarpolu']	['13-Nov-2014']	['Ebola virus/H.sapiens-wt/LBR/2014/Makona-LIBR0157']
virion spike glycoprotein precursor [Zaire ebolavirus].	ALG02116.1	930628080	676	['Liberia']	['19-Aug-2014']	['Ebola virus/H.sapiens-wt/LBR/2014/Makona-LIBR10187']
virion spike glycoprotein precursor [Zaire ebolavirus].	ALG02107.1	930628070	676	['Liberia: Montserrado']	['11-Oct-2014']	['Ebola virus/H.sapiens-wt/LBR/2014/Makona-LIBR10180']
virion spike glycoprotein precursor [Zaire ebolavirus].	ALG02098.1	930628060	676	['Liberia: Montserrado']	['19-Aug-2014']	['Ebola virus/H.sapiens-wt/LBR/2014/Makona-LIBR10014']
virion spike glycoprotein precursor [Zaire ebolavirus].	ALG02089.1	930628050	676	['Liberia: Montserrado']	['29-Sep-2014']	['Ebola virus/H.sapiens-wt/LBR/2014/Makona-LIBR10214']
virion spike glycoprotein precursor [Zaire ebolavirus].	ALG02080.1	930628040	676	['Liberia']	['04-Jul-2014']	['Ebola virus/H.sapiens-wt/LBR/2014/Makona-LIBR10249']
virion spike glycoprotein precursor [Zaire ebolavirus].	ALG02071.1	930628030	676	['Liberia']	['20-Aug-2014']	['Ebola virus/H.sapiens-wt/LBR/2014/Makona-LIBR10110']
virion spike glycoprotein precursor [Zaire ebolavirus].	ALG02062.1	930628020	676	['Liberia: Nimba']	['15-Aug-2014']	['Ebola virus/H.sapiens-wt/LBR/2014/Makona-LIBR10033']
virion spike glycoprotein precursor [Zaire ebolavirus].	ALG02053.1	930628010	676	['Liberia']	['09-Sep-2014']	['Ebola virus/H.sapiens-wt/LBR/2014/Makona-LIBR10137']
virion spike glycoprotein precursor [Zaire ebolavirus].	ALG02044.1	930628000	676	['Liberia: Montserrado']	['04-Feb-2015']	['Ebola virus/H.sapiens-wt/LBR/2015/Makona-LIBR1221']
virion spike glycoprotein precursor [Zaire ebolavirus].	ALG02035.1	930627990	676	['Liberia']	['17-Aug-2014']	['Ebola virus/H.sapiens-wt/LBR/2014/Makona-LIBR10098']
virion spike glycoprotein precursor [Zaire ebolavirus].	ALG02026.1	930627980	676	['Liberia']	['24-Aug-2014']	['Ebola virus/H.sapiens-wt/LBR/2014/Makona-LIBR10169']
virion spike glycoprotein precursor [Zaire ebolavirus].	ALG02017.1	930627970	676	['Liberia: Margibi']	['26-Aug-2014']	['Ebola virus/H.sapiens-wt/LBR/2014/Makona-LIBR10086']
virion spike glycoprotein precursor [Zaire ebolavirus].	ALG02008.1	930627960	676	['Liberia']	['17-Aug-2014']	['Ebola virus/H.sapiens-wt/LBR/2014/Makona-LIBR10092']
virion spike glycoprotein precursor [Zaire ebolavirus].	ALG01999.1	930627950	676	['Liberia: Montserrado']	['20-Sep-2014']	['Ebola virus/H.sapiens-wt/LBR/2014/Makona-LIBR10066']
virion spike glycoprotein precursor [Zaire ebolavirus].	ALG01990.1	930627940	676	['Liberia']	['16-Aug-2014']	['Ebola virus/H.sapiens-wt/LBR/2014/Makona-LIBR10022']
virion spike glycoprotein precursor [Zaire ebolavirus].	ALG01981.1	930627930	676	['Liberia']	['17-Aug-2014']	['Ebola virus/H.sapiens-wt/LBR/2014/Makona-LIBR10089']
virion spike glycoprotein precursor [Zaire ebolavirus].	ALG01972.1	930627920	676	['Liberia: Montserrado']	['23-Sep-2014']	['Ebola virus/H.sapiens-wt/LBR/2014/Makona-LIBR10061']
virion spike glycoprotein precursor [Zaire ebolavirus].	ALG01963.1	930627910	676	['Liberia: Montserrado']	['11-Oct-2014']	['Ebola virus/H.sapiens-wt/LBR/2014/Makona-LIBR10179']
virion spike glycoprotein precursor [Zaire ebolavirus].	ALG01954.1	930627900	676	['Liberia: Montserrado']	['05-Oct-2014']	['Ebola virus/H.sapiens-wt/LBR/2014/Makona-LIBR10267']
virion spike glycoprotein precursor [Zaire ebolavirus].	ALG01945.1	930627890	676	['Liberia']	['19-Sep-2014']	['Ebola virus/H.sapiens-wt/LBR/2014/Makona-LIBR10212']
virion spike glycoprotein precursor [Zaire ebolavirus].	ALG01936.1	930627880	676	['Liberia: Montserrado']	['02-Oct-2014']	['Ebola virus/H.sapiens-wt/LBR/2014/Makona-LIBR11079']
virion spike glycoprotein precursor [Zaire ebolavirus].	ALG01927.1	930627870	676	['Liberia: Montserrado']	['19-Sep-2014']	['Ebola virus/H.sapiens-wt/LBR/2014/Makona-LIBR10209']
virion spike glycoprotein precursor [Zaire ebolavirus].	ALG01918.1	930627860	676	['Liberia: Montserrado']	['13-Nov-2014']	['Ebola virus/H.sapiens-wt/LBR/2014/Makona-LIBR0160']
virion spike glycoprotein precursor [Zaire ebolavirus].	ALG01909.1	930627850	676	['Liberia: Margibi']	['26-Aug-2014']	['Ebola virus/H.sapiens-wt/LBR/2014/Makona-LIBR10277']
virion spike glycoprotein precursor [Zaire ebolavirus].	ALG01900.1	930627840	676	['Liberia']	['01-Oct-2014']	['Ebola virus/H.sapiens-wt/LBR/2014/Makona-LIBR10051']
virion spike glycoprotein precursor [Zaire ebolavirus].	ALG01891.1	930627830	676	['Liberia']	['20-Aug-2014']	['Ebola virus/H.sapiens-wt/LBR/2014/Makona-LIBR10113']
virion spike glycoprotein precursor [Zaire ebolavirus].	ALG01882.1	930627820	676	['Liberia: Montserrado']	['29-Dec-2014']	['Ebola virus/H.sapiens-wt/LBR/2014/Makona-LIBR0707']
virion spike glycoprotein precursor [Zaire ebolavirus].	ALG01873.1	930627810	676	['Liberia: River Gee']	['20-Aug-2014']	['Ebola virus/H.sapiens-wt/LBR/2014/Makona-LIBR10112']
virion spike glycoprotein precursor [Zaire ebolavirus].	ALG01864.1	930627800	676	['Liberia: Montserrado']	['24-Aug-2014']	['Ebola virus/H.sapiens-wt/LBR/2014/Makona-LIBR10118']
virion spike glycoprotein precursor [Zaire ebolavirus].	ALG01855.1	930627790	676	['Liberia: Nimba']	['17-Aug-2014']	['Ebola virus/H.sapiens-wt/LBR/2014/Makona-LIBR10093']
virion spike glycoprotein precursor [Zaire ebolavirus].	ALG01846.1	930627780	676	['Liberia']	['20-Sep-2014']	['Ebola virus/H.sapiens-wt/LBR/2014/Makona-LIBR10145']
virion spike glycoprotein precursor [Zaire ebolavirus].	ALG01837.1	930627770	676	['Liberia']	['01-Oct-2014']	['Ebola virus/H.sapiens-wt/LBR/2014/Makona-LIBR10048']
virion spike glycoprotein precursor [Zaire ebolavirus].	ALG01828.1	930627760	676	['Liberia']	['23-Jun-2014']	['Ebola virus/H.sapiens-wt/LBR/2014/Makona-LIBR10250']
virion spike glycoprotein precursor [Zaire ebolavirus].	ALG01819.1	930627750	676	['Liberia']	['23-Sep-2014']	['Ebola virus/H.sapiens-wt/LBR/2014/Makona-LIBR10062']
virion spike glycoprotein precursor [Zaire ebolavirus].	ALG01810.1	930627740	676	['Liberia: Margibi']	['05-Oct-2014']	['Ebola virus/H.sapiens-wt/LBR/2014/Makona-LIBR11177']
virion spike glycoprotein precursor [Zaire ebolavirus].	ALG01801.1	930627730	676	['Liberia: Montserrado']	['23-Sep-2014']	['Ebola virus/H.sapiens-wt/LBR/2014/Makona-LIBR10060']
virion spike glycoprotein precursor [Zaire ebolavirus].	ALG01792.1	930627720	676	['Liberia: Montserrado']	['27-Aug-2014']	['Ebola virus/H.sapiens-wt/LBR/2014/Makona-LIBR10202']
virion spike glycoprotein precursor [Zaire ebolavirus].	ALG01783.1	930627710	676	['Liberia: Montserrado']	['30-Aug-2014']	['Ebola virus/H.sapiens-wt/LBR/2014/Makona-LIBR10128']
virion spike glycoprotein precursor [Zaire ebolavirus].	ALG01774.1	930627700	676	['Liberia: Montserrado']	['26-Sep-2014']	['Ebola virus/H.sapiens-wt/LBR/2014/Makona-LIBR10230']
virion spike glycoprotein precursor [Zaire ebolavirus].	ALG01765.1	930627690	676	['Liberia']	['20-Sep-2014']	['Ebola virus/H.sapiens-wt/LBR/2014/Makona-LIBR10168']
virion spike glycoprotein precursor [Zaire ebolavirus].	ALG01756.1	930627680	676	['Liberia: Grand Bassa']	['13-Sep-2014']	['Ebola virus/H.sapiens-wt/LBR/2014/Makona-LIBR10156']
virion spike glycoprotein precursor [Zaire ebolavirus].	ALG01747.1	930627670	676	['Liberia: Montserrado']	['19-Sep-2014']	['Ebola virus/H.sapiens-wt/LBR/2014/Makona-LIBR10205']
virion spike glycoprotein precursor [Zaire ebolavirus].	ALG01738.1	930627660	676	['Liberia: Montserrado']	['17-Aug-2014']	['Ebola virus/H.sapiens-wt/LBR/2014/Makona-LIBR10170']
virion spike glycoprotein precursor [Zaire ebolavirus].	ALG01729.1	930627650	676	['Liberia: Montserrado']	['26-Aug-2014']	['Ebola virus/H.sapiens-wt/LBR/2014/Makona-LIBR10088']
virion spike glycoprotein precursor [Zaire ebolavirus].	ALG01720.1	930627640	676	['Liberia: Margibi']	['16-Aug-2014']	['Ebola virus/H.sapiens-wt/LBR/2014/Makona-LIBR10029']
virion spike glycoprotein precursor [Zaire ebolavirus].	ALG01711.1	930627630	676	['Liberia']	['26-Aug-2014']	['Ebola virus/H.sapiens-wt/LBR/2014/Makona-LIBR10271']
virion spike glycoprotein precursor [Zaire ebolavirus].	ALG01702.1	930627620	676	['Liberia: Margibi']	['26-Aug-2014']	['Ebola virus/H.sapiens-wt/LBR/2014/Makona-LIBR10087']
virion spike glycoprotein precursor [Zaire ebolavirus].	ALG01693.1	930627610	676	['Liberia: Margibi']	['01-Oct-2014']	['Ebola virus/H.sapiens-wt/LBR/2014/Makona-LIBR10047']
virion spike glycoprotein precursor [Zaire ebolavirus].	ALG01684.1	930627600	676	['Liberia']	['16-Aug-2014']	['Ebola virus/H.sapiens-wt/LBR/2014/Makona-LIBR10026']
virion spike glycoprotein precursor [Zaire ebolavirus].	ALG01675.1	930627590	676	['Liberia: Montserrado']	['01-Sep-2014']	['Ebola virus/H.sapiens-wt/LBR/2014/Makona-LIBR10130']
virion spike glycoprotein precursor [Zaire ebolavirus].	ALG01666.1	930627580	676	['Liberia: Montserrado']	['26-Nov-2014']	['Ebola virus/H.sapiens-wt/LBR/2014/Makona-LIBR0350']
virion spike glycoprotein precursor [Zaire ebolavirus].	ALG01657.1	930627570	676	['Liberia: Montserrado']	['26-Aug-2014']	['Ebola virus/H.sapiens-wt/LBR/2014/Makona-LIBR10279']
virion spike glycoprotein precursor [Zaire ebolavirus].	ALG01648.1	930627560	676	['Liberia: Bomi']	['23-Sep-2014']	['Ebola virus/H.sapiens-wt/LBR/2014/Makona-LIBR10055']
virion spike glycoprotein precursor [Zaire ebolavirus].	ALG01639.1	930627550	676	['Liberia: Margibi']	['26-Aug-2014']	['Ebola virus/H.sapiens-wt/LBR/2014/Makona-LIBR10081']
virion spike glycoprotein precursor [Zaire ebolavirus].	ALG01630.1	930627540	676	['Liberia: Nimba']	['20-Aug-2014']	['Ebola virus/H.sapiens-wt/LBR/2014/Makona-LIBR10103']
virion spike glycoprotein precursor [Zaire ebolavirus].	ALG01621.1	930627530	676	['Liberia: Nimba']	['20-Aug-2014']	['Ebola virus/H.sapiens-wt/LBR/2014/Makona-LIBR10106']
virion spike glycoprotein precursor [Zaire ebolavirus].	ALG01612.1	930627520	676	['Liberia']	['25-Jun-2014']	['Ebola virus/H.sapiens-wt/LBR/2014/Makona-LIBR10306']
virion spike glycoprotein precursor [Zaire ebolavirus].	ALG01603.1	930627510	676	['Liberia']	['18-Aug-2014']	['Ebola virus/H.sapiens-wt/LBR/2014/Makona-LIBR10021']
virion spike glycoprotein precursor [Zaire ebolavirus].	ALG01594.1	930627500	676	['Liberia']	['20-Sep-2014']	['Ebola virus/H.sapiens-wt/LBR/2014/Makona-LIBR10076']
virion spike glycoprotein precursor [Zaire ebolavirus].	ALG01585.1	930627490	676	['Liberia: Grand Bassa']	['17-Nov-2014']	['Ebola virus/H.sapiens-wt/LBR/2014/Makona-LIBR0229']
virion spike glycoprotein precursor [Zaire ebolavirus].	ALG01576.1	930627480	676	['Liberia']	['01-Jul-2014']	['Ebola virus/H.sapiens-wt/LBR/2014/Makona-LIBR10245']
virion spike glycoprotein precursor [Zaire ebolavirus].	ALG01567.1	930627470	676	['Liberia']	['22-Aug-2014']	['Ebola virus/H.sapiens-wt/LBR/2014/Makona-LIBR10101']
virion spike glycoprotein precursor [Zaire ebolavirus].	ALG01558.1	930627460	676	['Liberia: Montserrado']	['10-Nov-2014']	['Ebola virus/H.sapiens-wt/LBR/2014/Makona-LIBR0112']
virion spike glycoprotein precursor [Zaire ebolavirus].	ALG01549.1	930627450	676	['Liberia: Montserrado']	['19-Sep-2014']	['Ebola virus/H.sapiens-wt/LBR/2014/Makona-LIBR10208']
virion spike glycoprotein precursor [Zaire ebolavirus].	ALG01540.1	930627440	676	['Liberia: Grand Cape Mount']	['22-Nov-2014']	['Ebola virus/H.sapiens-wt/LBR/2014/Makona-LIBR0284']
virion spike glycoprotein precursor [Zaire ebolavirus].	ALG01531.1	930627430	676	['Liberia: Montserrado']	['13-Nov-2014']	['Ebola virus/H.sapiens-wt/LBR/2014/Makona-LIBR0159']
virion spike glycoprotein precursor [Zaire ebolavirus].	ALG01522.1	930627420	676	['Liberia: Margibi']	['26-Aug-2014']	['Ebola virus/H.sapiens-wt/LBR/2014/Makona-LIBR10077']
virion spike glycoprotein precursor [Zaire ebolavirus].	ALG01513.1	930627410	676	['Liberia']	['20-Sep-2014']	['Ebola virus/H.sapiens-wt/LBR/2014/Makona-LIBR10074']
virion spike glycoprotein precursor [Zaire ebolavirus].	ALG01504.1	930627400	676	['Liberia']	['19-Jul-2014']	['Ebola virus/H.sapiens-wt/LBR/2014/Makona-LIBR10239']
virion spike glycoprotein precursor [Zaire ebolavirus].	ALG01495.1	930627390	676	['Liberia']	['29-Sep-2014']	['Ebola virus/H.sapiens-wt/LBR/2014/Makona-LIBR10217']
virion spike glycoprotein precursor [Zaire ebolavirus].	ALG01486.1	930627380	676	['Liberia']	['18-Jul-2014']	['Ebola virus/H.sapiens-wt/LBR/2014/Makona-LIBR10238']
virion spike glycoprotein precursor [Zaire ebolavirus].	ALG01477.1	930627370	676	['Liberia: Montserrado']	['19-Sep-2014']	['Ebola virus/H.sapiens-wt/LBR/2014/Makona-LIBR10210']
virion spike glycoprotein precursor [Zaire ebolavirus].	ALG01468.1	930627360	676	['Liberia']	['24-Jun-2014']	['Ebola virus/H.sapiens-wt/LBR/2014/Makona-LIBR10240']
virion spike glycoprotein precursor [Zaire ebolavirus].	ALG01459.1	930627350	676	['Liberia: Grand Kru']	['15-Sep-2014']	['Ebola virus/H.sapiens-wt/LBR/2014/Makona-LIBR10251']
virion spike glycoprotein precursor [Zaire ebolavirus].	ALG01450.1	930627340	676	['Liberia: Montserrado']	['13-Sep-2014']	['Ebola virus/H.sapiens-wt/LBR/2014/Makona-LIBR10154']
virion spike glycoprotein precursor [Zaire ebolavirus].	ALG01441.1	930627330	676	['Liberia']	['09-Sep-2014']	['Ebola virus/H.sapiens-wt/LBR/2014/Makona-LIBR10151']
virion spike glycoprotein precursor [Zaire ebolavirus].	ALG01432.1	930627320	676	['Liberia']	['21-Aug-2014']	['Ebola virus/H.sapiens-wt/LBR/2014/Makona-LIBR10008']
virion spike glycoprotein precursor [Zaire ebolavirus].	ALG01423.1	930627310	676	['Liberia: Margibi']	['16-Aug-2014']	['Ebola virus/H.sapiens-wt/LBR/2014/Makona-LIBR10025']
virion spike glycoprotein precursor [Zaire ebolavirus].	ALG01414.1	930627300	676	['Liberia']	['04-Aug-2014']	['Ebola virus/H.sapiens-wt/LBR/2014/Makona-LIBR10040']
virion spike glycoprotein precursor [Zaire ebolavirus].	ALG01405.1	930627290	676	['Liberia: Montserrado']	['31-Oct-2014']	['Ebola virus/H.sapiens-wt/LBR/2014/Makona-LIBR0008']
virion spike glycoprotein precursor [Zaire ebolavirus].	ALG01396.1	930627280	676	['Liberia']	['18-Oct-2014']	['Ebola virus/H.sapiens-wt/LBR/2014/Makona-LIBR10265']
virion spike glycoprotein precursor [Zaire ebolavirus].	ALG01387.1	930627270	676	['Liberia']	['10-Aug-2014']	['Ebola virus/H.sapiens-wt/LBR/2014/Makona-LIBR10037']
virion spike glycoprotein precursor [Zaire ebolavirus].	ALG01378.1	930627260	676	['Liberia: Montserrado']	['02-Oct-2014']	['Ebola virus/H.sapiens-wt/LBR/2014/Makona-LIBR10307']
virion spike glycoprotein precursor [Zaire ebolavirus].	ALG01369.1	930627250	676	['Liberia: Grand Bassa']	['26-Aug-2014']	['Ebola virus/H.sapiens-wt/LBR/2014/Makona-LIBR10079']
virion spike glycoprotein precursor [Zaire ebolavirus].	ALG01360.1	930627240	676	['Liberia: Montserrado']	['20-Sep-2014']	['Ebola virus/H.sapiens-wt/LBR/2014/Makona-LIBR10071']
virion spike glycoprotein precursor [Zaire ebolavirus].	ALG01351.1	930627230	676	['Liberia: Montserrado']	['20-Sep-2014']	['Ebola virus/H.sapiens-wt/LBR/2014/Makona-LIBR10072']
virion spike glycoprotein precursor [Zaire ebolavirus].	ALG01342.1	930627220	676	['Liberia: Montserrado']	['27-Aug-2014']	['Ebola virus/H.sapiens-wt/LBR/2014/Makona-LIBR10201']
virion spike glycoprotein precursor [Zaire ebolavirus].	ALG01333.1	930627210	676	['Liberia: Grand Bassa']	['26-Sep-2014']	['Ebola virus/H.sapiens-wt/LBR/2014/Makona-LIBR10222']
virion spike glycoprotein precursor [Zaire ebolavirus].	ALG01324.1	930627200	676	['Liberia: Montserrado']	['26-Sep-2014']	['Ebola virus/H.sapiens-wt/LBR/2014/Makona-LIBR10226']
virion spike glycoprotein precursor [Zaire ebolavirus].	ALG01315.1	930627190	676	['Liberia: Grand Bassa']	['06-Nov-2014']	['Ebola virus/H.sapiens-wt/LBR/2014/Makona-LIBR0071']
virion spike glycoprotein precursor [Zaire ebolavirus].	ALG01306.1	930627180	676	['Liberia: Montserrado']	['26-Sep-2014']	['Ebola virus/H.sapiens-wt/LBR/2014/Makona-LIBR10224']
virion spike glycoprotein precursor [Zaire ebolavirus].	ALG01297.1	930627170	676	['Liberia: Montserrado']	['26-Sep-2014']	['Ebola virus/H.sapiens-wt/LBR/2014/Makona-LIBR10223']
virion spike glycoprotein precursor [Zaire ebolavirus].	ALG01288.1	930627160	676	['Liberia: Margibi']	['26-Aug-2014']	['Ebola virus/H.sapiens-wt/LBR/2014/Makona-LIBR10082']
virion spike glycoprotein precursor [Zaire ebolavirus].	ALG01279.1	930627150	676	['Liberia']	['10-Aug-2014']	['Ebola virus/H.sapiens-wt/LBR/2014/Makona-LIBR10036']
virion spike glycoprotein precursor [Zaire ebolavirus].	ALG01270.1	930627140	676	['Liberia']	['21-Sep-2014']	['Ebola virus/H.sapiens-wt/LBR/2014/Makona-LIBR10065']
virion spike glycoprotein precursor [Zaire ebolavirus].	ALF04551.1	929047217	676	['Sierra Leone']	['17-Sep-2014']	['Ebola virus/H.sapiens-wt/SLE/2014/Makona-201403164']
virion spike glycoprotein precursor [Zaire ebolavirus].	ALF04542.1	929047207	676	['Sierra Leone']	['07-Sep-2014']	['Ebola virus/H. sapiens-wt/SLE/2014/Makona-201409581']
virion spike glycoprotein precursor [Zaire ebolavirus].	AIZ50427.1	731187656	676	['USA']	['13-Oct-2014']	['Ebola virus/H.sapiens-wt/USA/2014/Makona-201403305']
virion spike glycoprotein precursor [Zaire ebolavirus].	AIZ50418.1	731187646	676	['USA']	['11-Oct-2014']	['Ebola virus/H.sapiens-wt/USA/2014/Makona-201403293']
virion spike glycoprotein precursor [Zaire ebolavirus].	AIZ50409.1	731187636	676	['Liberia']	['06-Oct-2014']	['Ebola virus/H.sapiens-wt/LBR/2014/Makona-201403275']
virion spike glycoprotein precursor [Zaire ebolavirus].	AIZ50400.1	731187626	676	['Liberia']	['26-Sep-2014']	['Ebola virus/H.sapiens-wt/LBR/2014/Makona-201403261']
virion spike glycoprotein precursor [Zaire ebolavirus].	AIZ50391.1	731187616	676	['Sierra Leone']	['13-Sep-2014']	['Ebola virus/H.sapiens-wt/SLE/2014/Makona-201403147']
virion spike glycoprotein precursor [Zaire ebolavirus].	AKL91127.1	831182910	676	['Guinea: Kissidougou']	['17-Mar-2014']	['Ebola virus/H.sapiens-wt/GIN/2014/Makona-C15']
virion spike glycoprotein precursor [Zaire ebolavirus].	AKL91118.1	831182900	676	['Guinea: Kissidougou']	['17-Mar-2014']	['Ebola virus/H.sapiens-wt/GIN/2014/Makona-C15']
virion spike glycoprotein precursor [Zaire ebolavirus].	AKL91109.1	831182890	676	['Guinea: Gueckedou']	['20-Mar-2014']	['Ebola virus/H.sapiens-wt/GIN/2014/Makona-C07']
virion spike glycoprotein precursor [Zaire ebolavirus].	AKL91100.1	831182880	676	['Guinea: Gueckedou']	['20-Mar-2014']	['Ebola virus/H.sapiens-wt/GIN/2014/Makona-C07']
virion spike glycoprotein precursor [Zaire ebolavirus].	AKL91091.1	831182870	676	['Guinea: Gueckedou']	['19-Mar-2014']	['Ebola virus/H.sapiens-wt/GIN/2014/Makona-C05']
virion spike glycoprotein precursor [Zaire ebolavirus].	AKL91082.1	831182860	676	['Guinea: Gueckedou']	['19-Mar-2014']	['Ebola virus/H.sapiens-wt/GIN/2014/Makona-C05']
virion spike glycoprotein precursor [Zaire ebolavirus].	ALX34563.1	973435237	676	['Sierra Leone']	['31-May-2015']	['Ebola virus/H.sapiens-wt/SLE/2015/Makona-0806_C1_PL7496']
virion spike glycoprotein precursor [Zaire ebolavirus].	ALX34513.1	973435180	676	['Sierra Leone']	['12-Jan-2015']	['Ebola virus/H.sapiens-wt/SLE/2015/Makona-2507_C1_77756_EMLK']
virion spike glycoprotein precursor [Zaire ebolavirus].	ALX34482.1	973435145	676	['Sierra Leone']	['24-Dec-2014']	['Ebola virus/H.sapiens-wt/SLE/2014/Makona-1807_C1_MK0464']
virion spike glycoprotein precursor [Zaire ebolavirus].	ALX34382.1	973435029	676	['Sierra Leone']	['27-May-2015']	['Ebola virus/H.sapiens-wt/SLE/2015/Makona-0806_C1_PL7401']
virion spike glycoprotein precursor [Zaire ebolavirus].	ALX34356.1	973434999	676	['Sierra Leone']	['11-Jan-2015']	['Ebola virus/H.sapiens-wt/SLE/2015/Makona-0806_C1_MK1079']
virion spike glycoprotein precursor [Zaire ebolavirus].	ALX34090.1	973434691	676	['Sierra Leone']	['29-Jan-2015']	['Ebola virus/H.sapiens-wt/SLE/2015/Makona-2807_C1_468_EMLH']
virion spike glycoprotein precursor [Zaire ebolavirus].	ALX34061.1	973434658	676	['Sierra Leone']	['19-Apr-2015']	['Ebola virus/H.sapiens-wt/SLE/2015/Makona-0807_C1_14748_EMLK']
virion spike glycoprotein precursor [Zaire ebolavirus].	ALX34040.1	973434634	676	['Sierra Leone']	['15-Mar-2015']	['Ebola virus/H.sapiens-wt/SLE/2015/Makona-0807_C1_PL4804']
virion spike glycoprotein precursor [Zaire ebolavirus].	ALX34025.1	973434617	676	['Sierra Leone']	['24-Mar-2015']	['Ebola virus/H.sapiens-wt/SLE/2015/Makona-0205_C1_PL5294']
virion spike glycoprotein precursor [Zaire ebolavirus].	ALX33664.1	973434199	676	['Sierra Leone']	['06-Feb-2015']	['Ebola virus/H.sapiens-wt/SLE/2015/Makona-0806_C1_KT4715']
virion spike glycoprotein precursor [Zaire ebolavirus].	ALX33481.1	973433988	676	['Sierra Leone']	['12-Feb-2015']	['Ebola virus/H.sapiens-wt/SLE/2015/Makona-1807_C2_10454_EMLK']
virion spike glycoprotein precursor [Zaire ebolavirus].	ALX33372.1	973433863	676	['Sierra Leone']	['31-Dec-2014']	['Ebola virus/H.sapiens-wt/SLE/2014/Makona-1708_C1_MK0704R']
virion spike glycoprotein precursor [Zaire ebolavirus].	ALX33061.1	973433506	676	['Sierra Leone']	['29-May-2015']	['Ebola virus/H.sapiens-wt/SLE/2015/Makona-0806_C1_PL7429']
virion spike glycoprotein precursor [Zaire ebolavirus].	ALX32828.1	973433237	676	['Sierra Leone']	['17-Jan-2015']	['Ebola virus/H.sapiens-wt/SLE/2015/Makona-2605_C1_MK1202']
virion spike glycoprotein precursor [Zaire ebolavirus].	ALX32618.1	973432995	676	['Sierra Leone']	['04-Feb-2015']	['Ebola virus/H.sapiens-wt/SLE/2015/Makona-0806_C1_KT4695']
virion spike glycoprotein precursor [Zaire ebolavirus].	ALX32603.1	973432978	676	['Sierra Leone']	['18-Mar-2015']	['Ebola virus/H.sapiens-wt/SLE/2015/Makona-0305_C1_PL4932']
virion spike glycoprotein precursor [Zaire ebolavirus].	ALX32475.1	973432831	676	['Sierra Leone']	['11-Jan-2015']	['Ebola virus/H.sapiens-wt/SLE/2015/Makona-0806_C1_MK1040']
virion spike glycoprotein precursor [Zaire ebolavirus].	ALX32466.1	973432821	676	['Sierra Leone']	['16-Mar-2015']	['Ebola virus/H.sapiens-wt/SLE/2015/Makona-0305_C1_PL4844']
virion spike glycoprotein precursor [Zaire ebolavirus].	ALX32009.1	973432293	676	['Sierra Leone']	['10-Jul-2015']	['Ebola virus/H.sapiens-wt/SLE/2015/Makona-1507_C1_18649_EMLH']
virion spike glycoprotein precursor [Zaire ebolavirus].	ALX31825.1	973432081	676	['Sierra Leone']	['18-Jun-2015']	['Ebola virus/H.sapiens-wt/SLE/2015/Makona-2906_C1_PL8172']
virion spike glycoprotein precursor [Zaire ebolavirus].	ALX31444.1	973431642	676	['Sierra Leone']	['10-Jul-2015']	['Ebola virus/H.sapiens-wt/SLE/2015/Makona-1507_C1_18650_EMLH']
virion spike glycoprotein precursor [Zaire ebolavirus].	ALX31111.1	973431258	676	['Sierra Leone']	['16-Jul-2015']	['Ebola virus/H.sapiens-wt/SLE/2015/Makona-0908_C1_KT7105B']
virion spike glycoprotein precursor [Zaire ebolavirus].	ALX31020.1	973431153	676	['Sierra Leone']	['28-Feb-2015']	['Ebola virus/H.sapiens-wt/SLE/2015/Makona-0807_C1_PL4121']
envelope glycoprotein [Sudan ebolavirus].	ALT19781.1	965570407	676	['Sudan']	['16-Oct-2000']	['Sudan virus/H. sapiens-tc/SDN/2000/Gulu-200011676']
envelope glycoprotein [Bundibugyo ebolavirus].	ALT19772.1	965570389	676	['Uganda']	['14-Nov-2007']	['Bundibugyo virus/H. sapiens-tc/UGA/2007/Bundibugyo-200706291']
envelope glycoprotein [Tai Forest ebolavirus].	ALT19763.1	965570374	676	["Cote d'Ivoire"]	['27-Nov-1994']	['Tai Forest virus/H. sapiens-tc/CIV/1994/Tai Forest-CDC807212']
envelope glycoprotein [Ebola virus].	ALT19754.1	965570359	676	['Zaire']	['04-May-1995']	['Ebola virus/H. sapiens-tc/COD/1995/Kikwit-9510622']
envelope glycoprotein [Ebola virus].	ALT19745.1	965570347	676	['Zaire']	['04-May-1995']	['Ebola virus/H. sapiens-tc/COD/1995/Kikwit-9510632']
envelope glycoprotein [Ebola virus].	ALT19736.1	965570336	676	['Zaire']	['04-May-1995']	['Ebola virus/H. sapiens-tc/COD/1995/Kikwit-9510627']
envelope glycoprotein [Ebola virus].	ALT19727.1	965570325	676	['Zaire']	['04-May-1995']	['Ebola virus/H. sapiens-tc/COD/1995/Kikwit-9510628']
envelope glycoprotein [Ebola virus].	ALT19718.1	965570314	676	['Zaire']	['04-May-1995']	['Ebola virus/H. sapiens-tc/COD/1995/Kikwit-9510621']
envelope glycoprotein [Ebola virus].	ALT19709.1	965570302	676	['Zaire']	['04-May-1995']	['Ebola virus/H. sapiens-tc/COD/1995/Kikwit-9510626']
envelope glycoprotein [Ebola virus].	ALT19700.1	965570291	676	['Zaire']	['04-May-1995']	['Ebola virus/H. sapiens-tc/COD/1995/Kikwit-9510625']
envelope glycoprotein [Ebola virus].	ALT19691.1	965570279	676	['Zaire']	['04-May-1995']	['Ebola virus/H. sapiens-tc/COD/1995/Kikwit-9510624']
envelope glycoprotein [Ebola virus].	ALT19682.1	965570267	676	['Zaire']	['04-May-1995']	['Ebola virus/H. sapiens-tc/COD/1995/Kikwit-9510629']
envelope glycoprotein [Ebola virus].	ALT19673.1	965570256	676	['Zaire']	['04-May-1995']	['Ebola virus/H. sapiens-tc/COD/1995/Kikwit-9510630']
envelope glycoprotein [Ebola virus].	ALT19664.1	965570245	676	['Zaire']	['04-May-1995']	['Ebola virus/H. sapiens-tc/COD/1995/Kikwit-9510631']
envelope glycoprotein [Ebola virus].	ALT19655.1	965570227	676	['Zaire']	['04-May-1995']	['Ebola virus/H. sapiens-tc/COD/1995/Kikwit-9510623']
GP [Zaire ebolavirus].	ALT19603.1	965569739	676	N/A	N/A	['Ebola virus/H.sapiens-rec/COD/1976/Yambuku-Mayinga-eGFP-SUDV_GP']
GP [Zaire ebolavirus].	ALT19570.1	965569696	676	N/A	N/A	['Ebola virus/H.sapiens-rec/COD/1976/Yambuku-Mayinga-eGFP- BDBV_GPdelta_sGP']
GP [Zaire ebolavirus].	ALT19560.1	965569683	676	N/A	N/A	['Ebola virus/H.sapiens-rec/COD/1976/Yambuku-Mayinga-eGFP-BDBV_GP']
virion spike glycoprotein precursor [Zaire ebolavirus].	ALQ12276.1	957742313	676	['United Kingdom']	['08-Oct-2015']	['Ebola virus/H.sapiens-wt/GBR/2015/Makona-UK2']
virion spike glycoprotein precursor [Zaire ebolavirus].	ALQ12267.1	957742303	676	['United Kingdom']	['08-Oct-2015']	['Ebola virus/H.sapiens-wt/GBR/2015/Makona-UK2']
virion spike glycoprotein precursor [Zaire ebolavirus].	ALO75889.1	953525494	676	['Italy']	['May-2015']	['Ebola virus/H.sapiens-tc/ITA/2015/Makona-INMI2']
virion spike glycoprotein precursor [Zaire ebolavirus].	ALG01261.1	930627130	676	['Liberia: Grand Bassa']	['26-Aug-2014']	['Ebola virus/H.sapiens-wt/LBR/2014/Makona-LIBR10078']
virion spike glycoprotein precursor [Zaire ebolavirus].	ALG01252.1	930627120	676	['Liberia: Grand Bassa']	['13-Sep-2014']	['Ebola virus/H.sapiens-wt/LBR/2014/Makona-LIBR10155']
virion spike glycoprotein precursor [Zaire ebolavirus].	ALG01243.1	930627110	676	['Liberia: Nimba']	['20-Sep-2014']	['Ebola virus/H.sapiens-wt/LBR/2014/Makona-LIBR10148']
virion spike glycoprotein precursor [Zaire ebolavirus].	ALG01234.1	930627100	676	['Liberia']	['16-Aug-2014']	['Ebola virus/H.sapiens-wt/LBR/2014/Makona-LIBR10027']
virion spike glycoprotein precursor [Zaire ebolavirus].	ALG01225.1	930627090	676	['Liberia: Montserrado']	['19-Aug-2014']	['Ebola virus/H.sapiens-wt/LBR/2014/Makona-LIBR10017']
virion spike glycoprotein precursor [Zaire ebolavirus].	ALG01216.1	930627080	676	['Liberia']	['18-Aug-2014']	['Ebola virus/H.sapiens-wt/LBR/2014/Makona-LIBR10020']
virion spike glycoprotein precursor [Zaire ebolavirus].	ALG01207.1	930627070	676	['Liberia: Bomi']	['10-Nov-2014']	['Ebola virus/H.sapiens-wt/LBR/2014/Makona-LIBR0118']
virion spike glycoprotein precursor [Zaire ebolavirus].	ALG01198.1	930627060	676	['Liberia: Montserrado']	['28-Nov-2014']	['Ebola virus/H.sapiens-wt/LBR/2014/Makona-LIBR0380']
virion spike glycoprotein precursor [Zaire ebolavirus].	ALG01189.1	930627050	676	['Liberia']	['01-Sep-2014']	['Ebola virus/H.sapiens-wt/LBR/2014/Makona-LIBR10172']
virion spike glycoprotein precursor [Zaire ebolavirus].	ALG01180.1	930627040	676	['Liberia: Montserrado']	['22-Dec-2014']	['Ebola virus/H.sapiens-wt/LBR/2014/Makona-LIBR0622']
virion spike glycoprotein precursor [Zaire ebolavirus].	ALG01171.1	930627030	676	['Liberia: Sinoe']	['14-Oct-2014']	['Ebola virus/H.sapiens-wt/LBR/2014/Makona-LIBR10261']
virion spike glycoprotein precursor [Zaire ebolavirus].	ALG01162.1	930627020	676	['Liberia']	['22-Aug-2014']	['Ebola virus/H.sapiens-wt/LBR/2014/Makona-LIBR10100']
virion spike glycoprotein precursor [Zaire ebolavirus].	ALG01153.1	930627010	676	['Liberia: Montserrado']	['16-Oct-2014']	['Ebola virus/H.sapiens-wt/LBR/2014/Makona-LIBR10262']
virion spike glycoprotein precursor [Zaire ebolavirus].	ALG01144.1	930627000	676	['Liberia']	['29-Sep-2014']	['Ebola virus/H.sapiens-wt/LBR/2014/Makona-LIBR10218']
virion spike glycoprotein precursor [Zaire ebolavirus].	ALG01135.1	930626990	676	['Liberia']	['26-Aug-2014']	['Ebola virus/H.sapiens-wt/LBR/2014/Makona-LIBR10196']
virion spike glycoprotein precursor [Zaire ebolavirus].	ALG01126.1	930626980	676	['Liberia: Margibi']	['16-Sep-2014']	['Ebola virus/H.sapiens-wt/LBR/2014/Makona-LIBR10253']
virion spike glycoprotein precursor [Zaire ebolavirus].	ALG01117.1	930626970	676	['Liberia']	['27-Aug-2014']	['Ebola virus/H.sapiens-wt/LBR/2014/Makona-LIBR10204']
virion spike glycoprotein precursor [Zaire ebolavirus].	ALG01108.1	930626960	676	['Liberia']	['22-Nov-2014']	['Ebola virus/H.sapiens-wt/LBR/2014/Makona-LIBR0279']
virion spike glycoprotein precursor [Zaire ebolavirus].	ALG01099.1	930626950	676	['Liberia: Montserrado']	['14-Nov-2014']	['Ebola virus/H.sapiens-wt/LBR/2014/Makona-LIBR0177']
virion spike glycoprotein precursor [Zaire ebolavirus].	ALG01090.1	930626940	676	['Liberia: Margibi']	['16-Aug-2014']	['Ebola virus/H.sapiens-wt/LBR/2014/Makona-LIBR10031']
virion spike glycoprotein precursor [Zaire ebolavirus].	ALG01081.1	930626930	676	['Liberia']	['14-Jul-2014']	['Ebola virus/H.sapiens-wt/LBR/2014/Makona-LIBR10248']
virion spike glycoprotein precursor [Zaire ebolavirus].	ALG01072.1	930626920	676	['Liberia: Margibi']	['23-Sep-2014']	['Ebola virus/H.sapiens-wt/LBR/2014/Makona-LIBR10056']
virion spike glycoprotein precursor [Zaire ebolavirus].	ALG01063.1	930626910	676	['Liberia']	['11-Jul-2014']	['Ebola virus/H.sapiens-wt/LBR/2014/Makona-LIBR10237']
virion spike glycoprotein precursor [Zaire ebolavirus].	ALG01054.1	930626900	676	['Liberia: Montserrado']	['07-Nov-2014']	['Ebola virus/H.sapiens-wt/LBR/2014/Makona-LIBR0079']
virion spike glycoprotein precursor [Zaire ebolavirus].	ALG01045.1	930626890	676	['Liberia: Grand Bassa']	['10-Nov-2014']	['Ebola virus/H.sapiens-wt/LBR/2014/Makona-LIBR0114']
virion spike glycoprotein precursor [Zaire ebolavirus].	ALG01036.1	930626880	676	['Liberia: Bong']	['22-Aug-2014']	['Ebola virus/H.sapiens-wt/LBR/2014/Makona-LIBR10127']
virion spike glycoprotein precursor [Zaire ebolavirus].	ALG01027.1	930626870	676	['Liberia']	['20-Sep-2014']	['Ebola virus/H.sapiens-wt/LBR/2014/Makona-LIBR10144']
virion spike glycoprotein precursor [Zaire ebolavirus].	ALG01018.1	930626860	676	['Liberia']	['01-Oct-2014']	['Ebola virus/H.sapiens-wt/LBR/2014/Makona-LIBR10050']
virion spike glycoprotein precursor [Zaire ebolavirus].	ALG01009.1	930626850	676	['Liberia: Bong']	['02-Oct-2014']	['Ebola virus/H.sapiens-wt/LBR/2014/Makona-LIBR10255']
virion spike glycoprotein precursor [Zaire ebolavirus].	ALG01000.1	930626840	676	['Liberia']	['02-Oct-2014']	['Ebola virus/H.sapiens-wt/LBR/2014/Makona-LIBR10254']
virion spike glycoprotein precursor [Zaire ebolavirus].	ALG00991.1	930626830	676	['Liberia']	['16-Aug-2014']	['Ebola virus/H.sapiens-wt/LBR/2014/Makona-LIBR10032']
virion spike glycoprotein precursor [Zaire ebolavirus].	ALG00982.1	930626820	676	['Liberia: Grand Kru']	['15-Sep-2014']	['Ebola virus/H.sapiens-wt/LBR/2014/Makona-LIBR10252']
virion spike glycoprotein precursor [Zaire ebolavirus].	ALG00973.1	930626810	676	['Liberia']	['09-Sep-2014']	['Ebola virus/H.sapiens-wt/LBR/2014/Makona-LIBR10139']
virion spike glycoprotein precursor [Zaire ebolavirus].	ALG00964.1	930626800	676	['Liberia']	['26-Aug-2014']	['Ebola virus/H.sapiens-wt/LBR/2014/Makona-LIBR10195']
virion spike glycoprotein precursor [Zaire ebolavirus].	ALG00955.1	930626790	676	['Liberia']	['09-Sep-2014']	['Ebola virus/H.sapiens-wt/LBR/2014/Makona-LIBR10136']
virion spike glycoprotein precursor [Zaire ebolavirus].	ALG00946.1	930626780	676	['Liberia']	['25-Jun-2014']	['Ebola virus/H.sapiens-wt/LBR/2014/Makona-LIBR10241']
virion spike glycoprotein precursor [Zaire ebolavirus].	ALG00937.1	930626770	676	['Liberia']	['04-Aug-2014']	['Ebola virus/H.sapiens-wt/LBR/2014/Makona-LIBR10042']
virion spike glycoprotein precursor [Zaire ebolavirus].	ALG00928.1	930626760	676	['Liberia']	['07-Sep-2014']	['Ebola virus/H.sapiens-wt/LBR/2014/Makona-LIBR10135']
virion spike glycoprotein precursor [Zaire ebolavirus].	ALG00919.1	930626750	676	['Liberia: Grand Bassa']	['15-Aug-2014']	['Ebola virus/H.sapiens-wt/LBR/2014/Makona-LIBR10035']
virion spike glycoprotein precursor [Zaire ebolavirus].	ALG00910.1	930626740	676	['Liberia']	['01-Oct-2014']	['Ebola virus/H.sapiens-wt/LBR/2014/Makona-LIBR10052']
virion spike glycoprotein precursor [Zaire ebolavirus].	ALG00901.1	930626730	676	['Liberia: Margibi']	['16-Aug-2014']	['Ebola virus/H.sapiens-wt/LBR/2014/Makona-LIBR10030']
virion spike glycoprotein precursor [Zaire ebolavirus].	ALG00892.1	930626720	676	['Liberia']	['26-Aug-2014']	['Ebola virus/H.sapiens-wt/LBR/2014/Makona-LIBR10270']
virion spike glycoprotein precursor [Zaire ebolavirus].	ALG00883.1	930626710	676	['Liberia: Margibi']	['08-Sep-2014']	['Ebola virus/H.sapiens-wt/LBR/2014/Makona-LIBR10132']
virion spike glycoprotein precursor [Zaire ebolavirus].	ALG00874.1	930626700	676	['Liberia: Grand Bassa']	['10-Nov-2014']	['Ebola virus/H.sapiens-wt/LBR/2014/Makona-LIBR0115']
virion spike glycoprotein precursor [Zaire ebolavirus].	ALN12279.1	949601183	676	['Sierra Leone']	['19-Dec-2014']	['Ebola virus/H.sapiens-wt/SLE/2014/Makona-Goderich2']
virion spike glycoprotein precursor [Zaire ebolavirus].	ALH21463.1	936348107	676	['Guinea']	['2014']	['H.sapiens-wt/GIN/2014/Makona-Conakry-CREMS-2214']
virion spike glycoprotein precursor [Zaire ebolavirus].	ALH21454.1	936348077	676	['Guinea']	['2014']	['H.sapiens-wt/GIN/2014/Makona-Conakry-CREMS-1022']
virion spike glycoprotein precursor [Zaire ebolavirus].	AKT08840.1	908275470	676	['Sierra Leone']	['19-Feb-2015']	['Ebola virus H.sapiens-wt/SLE/2015/Makona-Goderich1']
envelope glycoprotein [Zaire ebolavirus].	AKI84276.1	824041267	676	['Zaire: Kikwit']	['04-May-1995']	['Ebola virus/H.sapiens-tc/COD/1995/Kikwit-9510621']
envelope glycoprotein [Bundibugyo ebolavirus].	AKB09565.1	803773911	676	['Uganda']	['01-Oct-2007']	['Bundibugyo virus/H.sapiens-tc/UGA/2007/Butalya-811250']
envelope glycoprotein [Ebola virus].	AKB09556.1	803773888	676	['Democratic Republic of the Congo']	['01-Apr-1995']	['Ebola virus/H.sapiens-tc/COD/1995/Kikwit-807223']
envelope glycoprotein [Ebola virus].	AKB09547.1	803773864	676	['Democratic Republic of the Congo']	['01-Oct-1976']	['Ebola virus/H.sapiens-tc/COD/1976/Yambuku-Mayinga']
envelope glycoprotein [Sudan ebolavirus].	AKB09538.1	803773834	676	['Uganda']	['01-Oct-2000']	['Ebola virus/H.sapiens-tc/UGA/2000/Gulu-808892']
virion spike glycoprotein precursor [Zaire ebolavirus].	ALF04601.1	929048739	676	['Guinea: Conakry']	['13-Oct-2014']	['Ebola virus/H.sapiens-wt/GIN/2014/Makona-Conakry-211']
virion spike glycoprotein precursor [Zaire ebolavirus].	ALF04592.1	929048729	676	['Guinea: Conakry']	['14-Oct-2014']	['Ebola virus/H.sapiens-wt/GIN/2014/Makona-Conakry-223']
virion spike glycoprotein precursor [Zaire ebolavirus].	ALF04583.1	929048719	676	['Guinea: Kindia']	['18-Dec-2014']	['Ebola virus/H.sapiens-wt/GIN/2014/Makona-Kindia-802']
virion spike glycoprotein precursor [Zaire ebolavirus].	AKU75582.1	913075144	676	['Sierra Leone: Western Urban']	['30-Jun-2015']	['EBOV/DML14077/SLe/WesternUrban/20150630']
virion spike glycoprotein precursor [Zaire ebolavirus].	AKU75573.1	913075134	676	['Sierra Leone: Western Urban']	['11-Jul-2015']	['EBOV/DML14366/SLe/WesternUrban/20150711']
virion spike glycoprotein precursor [Zaire ebolavirus].	AKU75564.1	913075124	676	['Sierra Leone: Western Urban']	['03-Jul-2015']	['EBOV/DML14163/SLe/WesternUrban/20150703']
virion spike glycoprotein precursor [Zaire ebolavirus].	AKU75555.1	913075114	676	['Sierra Leone: Kono']	['10-Mar-2015']	['EBOV/DML25411/SLe/Kono/20150310']
virion spike glycoprotein precursor [Zaire ebolavirus].	AKU75546.1	913075104	676	['Sierra Leone: Kono']	['06-Mar-2015']	['EBOV/DML25344/SLe/Kono/20150306']
virion spike glycoprotein precursor [Zaire ebolavirus].	AKU75537.1	913075094	676	['Sierra Leone: Kono']	['23-Feb-2015']	['EBOV/DML25180/SLe/Kono/20150223']
virion spike glycoprotein precursor [Zaire ebolavirus].	AKU75528.1	913075084	676	['Sierra Leone: Kenema']	['18-Feb-2015']	['EBOV/DML25123/SLe/Kenema/20150218']
virion spike glycoprotein precursor [Zaire ebolavirus].	AKU75519.1	913075074	676	['Sierra Leone: Kono']	['19-Feb-2015']	['EBOV/DML25103/SLe/Kono/20150219']
virion spike glycoprotein precursor [Zaire ebolavirus].	AKU75510.1	913075064	676	['Sierra Leone: Kono']	['18-Feb-2015']	['EBOV/DML25083/SLe/Kono/20150218']
virion spike glycoprotein precursor [Zaire ebolavirus].	AKU75501.1	913075054	676	['Sierra Leone: Kono']	['06-Feb-2015']	['EBOV/DML24854/SLe/Kono/20150206']
virion spike glycoprotein precursor [Zaire ebolavirus].	AKU75492.1	913075044	676	['Sierra Leone: Kono']	['06-Feb-2015']	['EBOV/DML24853/SLe/Kono/20150206']
virion spike glycoprotein precursor [Zaire ebolavirus].	AKU75483.1	913075034	676	['Sierra Leone: Tonkolili']	['04-Feb-2015']	['EBOV/DML24825/SLe/Tonkolili/20150204']
virion spike glycoprotein precursor [Zaire ebolavirus].	AKU75474.1	913075024	676	['Sierra Leone: Kono']	['03-Feb-2015']	['EBOV/DML24818/SLe/Kono/20150203']
virion spike glycoprotein precursor [Zaire ebolavirus].	AKU75465.1	913075014	676	['Sierra Leone: Kono']	['30-Jan-2015']	['EBOV/DML24758/SLe/Kono/20150130']
virion spike glycoprotein precursor [Zaire ebolavirus].	AKU75456.1	913075004	676	['Sierra Leone: Kono']	['29-Jan-2015']	['EBOV/DML24720/SLe/Kono/20150129']
virion spike glycoprotein precursor [Zaire ebolavirus].	AKU75447.1	913074994	676	['Sierra Leone: Kono']	['28-Jan-2015']	['EBOV/DML24708/SLe/Kono/20150128']
virion spike glycoprotein precursor [Zaire ebolavirus].	AKU75438.1	913074984	676	['Sierra Leone: Kono']	['28-Jan-2015']	['EBOV/DML24706/SLe/Kono/20150128']
virion spike glycoprotein precursor [Zaire ebolavirus].	AKU75429.1	913074974	676	['Sierra Leone: Kono']	['26-Jan-2015']	['EBOV/DML24683/SLe/Kono/20150126']
virion spike glycoprotein precursor [Zaire ebolavirus].	AKU75420.1	913074964	676	['Sierra Leone: Kono']	['25-Jan-2015']	['EBOV/DML24677/SLe/Kono/20150125']
virion spike glycoprotein precursor [Zaire ebolavirus].	AKU75411.1	913074954	676	['Sierra Leone: Kono']	['25-Jan-2015']	['EBOV/DML24669/SLe/Kono/20150125']
virion spike glycoprotein precursor [Zaire ebolavirus].	AKU75402.1	913074944	676	['Sierra Leone: Kono']	['21-Jan-2015']	['EBOV/DML24620/SLe/Kono/20150121']
virion spike glycoprotein precursor [Zaire ebolavirus].	AKU75393.1	913074934	676	['Sierra Leone: Kono']	['21-Jan-2015']	['EBOV/DML24611/SLe/Kono/20150121']
virion spike glycoprotein precursor [Zaire ebolavirus].	AKU75384.1	913074924	676	['Sierra Leone: Kono']	['20-Jan-2015']	['EBOV/DML24608/SLe/Kono/20150120']
virion spike glycoprotein precursor [Zaire ebolavirus].	AKU75375.1	913074914	676	['Sierra Leone: Kono']	['20-Jan-2015']	['EBOV/DML24606/SLe/Kono/20150120']
virion spike glycoprotein precursor [Zaire ebolavirus].	AKU75366.1	913074904	676	['Sierra Leone: Kono']	['20-Jan-2015']	['EBOV/DML24605/SLe/Kono/20150120']
virion spike glycoprotein precursor [Zaire ebolavirus].	AKU75357.1	913074894	676	['Sierra Leone: Kono']	['20-Jan-2015']	['EBOV/DML24604/SLe/Kono/20150120']
virion spike glycoprotein precursor [Zaire ebolavirus].	AKU75350.1	913074886	676	['Sierra Leone: Kono']	['20-Jan-2015']	['EBOV/DML24601/SLe/Kono/20150120']
virion spike glycoprotein precursor [Zaire ebolavirus].	AKU75339.1	913074874	676	['Sierra Leone: Kono']	['20-Jan-2015']	['EBOV/DML24592/SLe/Kono/20150120']
virion spike glycoprotein precursor [Zaire ebolavirus].	AKU75330.1	913074864	676	['Sierra Leone: Kono']	['19-Jan-2015']	['EBOV/DML24581/SLe/Kono/20150119']
virion spike glycoprotein precursor [Zaire ebolavirus].	AKU75321.1	913074854	676	['Sierra Leone: Kono']	['18-Jan-2015']	['EBOV/DML24573/SLe/Kono/20150118']
virion spike glycoprotein precursor [Zaire ebolavirus].	AKU75312.1	913074844	676	['Sierra Leone: Kono']	['17-Jan-2015']	['EBOV/DML24553/SLe/Kono/20150117']
virion spike glycoprotein precursor [Zaire ebolavirus].	AKU75303.1	913074834	676	['Sierra Leone: Kono']	['17-Jan-2015']	['EBOV/DML24552/SLe/Kono/20150117']
virion spike glycoprotein precursor [Zaire ebolavirus].	AKU75294.1	913074824	676	['Sierra Leone: Kono']	['14-Jan-2015']	['EBOV/DML24511/SLe/Kono/20150114']
virion spike glycoprotein precursor [Zaire ebolavirus].	AKU75285.1	913074814	676	['Sierra Leone: Kono']	['14-Jan-2015']	['EBOV/DML24506/SLe/Kono/20150114']
virion spike glycoprotein precursor [Zaire ebolavirus].	AKU75276.1	913074804	676	['Sierra Leone: Kono']	['13-Jan-2015']	['EBOV/DML24504/SLe/Kono/20150113']
virion spike glycoprotein precursor [Zaire ebolavirus].	AKU75267.1	913074794	676	['Sierra Leone: Kono']	['13-Jan-2015']	['EBOV/DML24502/SLe/Kono/20150113']
virion spike glycoprotein precursor [Zaire ebolavirus].	AKU75258.1	913074784	676	['Sierra Leone: Western Urban']	['31-Mar-2015']	['EBOV/DML12485/SLe/WesternUrban/20150331']
virion spike glycoprotein precursor [Zaire ebolavirus].	AKU75249.1	913074774	676	['Sierra Leone: Western Urban']	['28-Mar-2015']	['EBOV/DML12458/SLe/WesternUrban/20150328']
virion spike glycoprotein precursor [Zaire ebolavirus].	AKU75240.1	913074764	676	['Sierra Leone: Western Urban']	['10-Mar-2015']	['EBOV/DML12268/SLe/WesternUrban/20150310']
virion spike glycoprotein precursor [Zaire ebolavirus].	AKU75231.1	913074754	676	['Sierra Leone: Western Urban']	['09-Mar-2015']	['EBOV/DML12260/SLe/WesternUrban/20150309']
virion spike glycoprotein precursor [Zaire ebolavirus].	AKU75222.1	913074744	676	['Sierra Leone: Western Urban']	['07-Mar-2015']	['EBOV/DML12239/SLe/WesternUrban/20150309']
virion spike glycoprotein precursor [Zaire ebolavirus].	AKU75213.1	913074734	676	['Sierra Leone: Western Urban']	['28-Feb-2015']	['EBOV/DML12137/SLe/WesternUrban/20150228']
virion spike glycoprotein precursor [Zaire ebolavirus].	AKU75204.1	913074724	676	['Sierra Leone: Western Urban']	['04-Mar-2015']	['EBOV/DML12194/SLe/WesternUrban/20150304']
virion spike glycoprotein precursor [Zaire ebolavirus].	AKU75195.1	913074714	676	['Sierra Leone: Western Urban']	['27-Feb-2015']	['EBOV/DML12120/SLe/WesternUrban/20150227']
virion spike glycoprotein precursor [Zaire ebolavirus].	AKU75186.1	913074704	676	['Sierra Leone: Western Urban']	['26-Feb-2015']	['EBOV/DML12117/SLe/WesternUrban/20150226']
virion spike glycoprotein precursor [Zaire ebolavirus].	AKU75177.1	913074694	676	['Sierra Leone: Western Urban']	['26-Feb-2015']	['EBOV/DML12116/SLe/WesternUrban/20150226']
virion spike glycoprotein precursor [Zaire ebolavirus].	AKU75168.1	913074684	676	['Sierra Leone: Western Urban']	['21-Feb-2015']	['EBOV/DML12051/SLe/WesternUrban/20150221']
virion spike glycoprotein precursor [Zaire ebolavirus].	AKU75159.1	913074674	676	['Sierra Leone: Western Urban']	['19-Feb-2015']	['EBOV/DML12033/SLe/WesternUrban/20150219']
GP [Zaire ebolavirus].	AKG65268.1	833552692	676	['Guinea']	['15-Sep-2014']	['Ebola virus/H.sapiens-wt/GIN/2014/Makona-Forecariah-989']
GP [Zaire ebolavirus].	AKG65853.1	820744099	676	['Guinea']	['07-Oct-2014']	['Ebola virus/H.sapiens-wt/GIN/2014/Makona-Coyah-1327']
GP [Zaire ebolavirus].	AKG65844.1	820744089	676	['Guinea']	['07-Oct-2014']	['Ebola virus/H.sapiens-wt/GIN/2014/Makona-Coyah-1320']
GP [Zaire ebolavirus].	AKG65835.1	820744079	676	['Guinea']	['04-Oct-2014']	['Ebola virus/H.sapiens-wt/GIN/2014/Makona-Coyah-1279']
GP [Zaire ebolavirus].	AKG65826.1	820744069	676	['Guinea']	['27-Aug-2014']	['Ebola virus/H.sapiens-wt/GIN/2014/Makona-Conakry-768']
GP [Zaire ebolavirus].	AKG65817.1	820744059	676	['Guinea']	['26-Aug-2014']	['Ebola virus/H.sapiens-wt/GIN/2014/Makona-Conakry-742']
GP [Zaire ebolavirus].	AKG65808.1	820744049	676	['Guinea']	['24-Jul-2014']	['Ebola virus/H.sapiens-wt/GIN/2014/Makona-Conakry-507']
GP [Zaire ebolavirus].	AKG65799.1	820744039	676	['Guinea']	['04-Oct-2014']	['Ebola virus/H.sapiens-wt/GIN/2014/Makona-Conakry-1250']
GP [Zaire ebolavirus].	AKG65790.1	820744029	676	['Guinea']	['02-Oct-2014']	['Ebola virus/H.sapiens-wt/GIN/2014/Makona-Conakry-1215']
GP [Zaire ebolavirus].	AKG65781.1	820744019	676	['Guinea']	['02-Oct-2014']	['Ebola virus/H.sapiens-wt/GIN/2014/Makona-Conakry-1213']
GP [Zaire ebolavirus].	AKG65772.1	820744009	676	['Guinea']	['27-Sep-2014']	['Ebola virus/H.sapiens-wt/GIN/2014/Makona-Conakry-1149']
GP [Zaire ebolavirus].	AKG65763.1	820743999	676	['Guinea']	['25-Sep-2014']	['Ebola virus/H.sapiens-wt/GIN/2014/Makona-Conakry-1129']
GP [Zaire ebolavirus].	AKG65754.1	820743989	676	['Guinea']	['25-Sep-2014']	['Ebola virus/H.sapiens-wt/GIN/2014/Makona-Conakry-1128']
GP [Zaire ebolavirus].	AKG65745.1	820743979	676	['Guinea']	['24-Sep-2014']	['Ebola virus/H.sapiens-wt/GIN/2014/Makona-Conakry-1105']
GP [Zaire ebolavirus].	AKG65736.1	820743969	676	['Guinea']	['19-Sep-2014']	['Ebola virus/H.sapiens-wt/GIN/2014/Makona-Conakry-1039']
GP [Zaire ebolavirus].	AKG65727.1	820743959	676	['Guinea']	['18-Sep-2014']	['Ebola virus/H.sapiens-wt/GIN/2014/Makona-Conakry-1027']
GP [Zaire ebolavirus].	AKG65718.1	820743949	676	['Guinea']	['16-Oct-2014']	['Ebola virus/H.sapiens-wt/GIN/2014/Makona-Conakry-1491']
GP [Zaire ebolavirus].	AKG65709.1	820743939	676	['Guinea']	['15-Oct-2014']	['Ebola virus/H.sapiens-wt/GIN/2014/Makona-Conakry-1481']
GP [Zaire ebolavirus].	AKG65700.1	820743929	676	['Guinea']	['25-Oct-2014']	['Ebola virus/H.sapiens-wt/GIN/2014/Makona-Coyah-1690']
GP [Zaire ebolavirus].	AKG65691.1	820743919	676	['Guinea']	['25-Oct-2014']	['Ebola virus/H.sapiens-wt/GIN/2014/Makona-Coyah-1689']
GP [Zaire ebolavirus].	AKG65682.1	820743909	676	['Guinea']	['24-Oct-2014']	['Ebola virus/H.sapiens-wt/GIN/2014/Makona-Coyah-1686']
GP [Zaire ebolavirus].	AKG65673.1	820743899	676	['Guinea']	['24-Oct-2014']	['Ebola virus/H.sapiens-wt/GIN/2014/Makona-Coyah-1652']
GP [Zaire ebolavirus].	AKG65664.1	820743889	676	['Guinea']	['24-Oct-2014']	['Ebola virus/H.sapiens-wt/GIN/2014/Makona-Conakry-1651']
GP [Zaire ebolavirus].	AKG65655.1	820743879	676	['Guinea']	['23-Oct-2014']	['Ebola virus/H.sapiens-wt/GIN/2014/Makona-Kindia-1648']
GP [Zaire ebolavirus].	AKG65646.1	820743869	676	['Guinea']	['24-Oct-2014']	['Ebola virus/H.sapiens-wt/GIN/2014/Makona-Forecariah-1623']
GP [Zaire ebolavirus].	AKG65637.1	820743859	676	['Guinea']	['22-Oct-2014']	['Ebola virus/H.sapiens-wt/GIN/2014/Makona-Nzeerekore-1622']
GP [Zaire ebolavirus].	AKG65628.1	820743849	676	['Guinea']	['20-Oct-2014']	['Ebola virus/H.sapiens-wt/GIN/2014/Makona-Forecariah-1571']
GP [Zaire ebolavirus].	AKG65619.1	820743839	676	['Guinea']	['18-Oct-2014']	['Ebola virus/H.sapiens-wt/GIN/2014/Makona-Forecariah-1568']
GP [Zaire ebolavirus].	AKG65610.1	820743829	676	['Guinea']	['18-Oct-2014']	['Ebola virus/H.sapiens-wt/GIN/2014/Makona-Forecariah-1567']
GP [Zaire ebolavirus].	AKG65601.1	820743819	676	['Guinea']	['19-Oct-2014']	['Ebola virus/H.sapiens-wt/GIN/2014/Makona-Conakry-1561']
GP [Zaire ebolavirus].	AKG65592.1	820743809	676	['Guinea']	['18-Oct-2014']	['Ebola virus/H.sapiens-wt/GIN/2014/Makona-Conakry-1551']
GP [Zaire ebolavirus].	AKG65583.1	820743799	676	['Guinea']	['15-Oct-2014']	['Ebola virus/H.sapiens-wt/GIN/2014/Makona-Conakry-1480']
GP [Zaire ebolavirus].	AKG65574.1	820743789	676	['Guinea']	['14-Oct-2014']	['Ebola virus/H.sapiens-wt/GIN/2014/Makona-Conakry-1454']
GP [Zaire ebolavirus].	AKG65565.1	820743779	676	['Guinea']	['14-Oct-2014']	['Ebola virus/H.sapiens-wt/GIN/2014/Makona-Conakry-1445']
GP [Zaire ebolavirus].	AKG65556.1	820743769	676	['Guinea']	['13-Oct-2014']	['Ebola virus/H.sapiens-wt/GIN/2014/Makona-Coyah-1436']
GP [Zaire ebolavirus].	AKG65547.1	820743759	676	['Guinea']	['11-Oct-2014']	['Ebola virus/H.sapiens-wt/GIN/2014/Makona-Coyah-1394']
GP [Zaire ebolavirus].	AKG65538.1	820743749	676	['Guinea']	['10-Oct-2014']	['Ebola virus/H.sapiens-wt/GIN/2014/Makona-Coyah-1374']
GP [Zaire ebolavirus].	AKG65529.1	820743739	676	['Guinea']	['10-Oct-2014']	['Ebola virus/H.sapiens-wt/GIN/2014/Makona-Conakry-1371']
GP [Zaire ebolavirus].	AKG65520.1	820743729	676	['Guinea']	['09-Oct-2014']	['Ebola virus/H.sapiens-wt/GIN/2014/Makona-Forecariah-1365']
GP [Zaire ebolavirus].	AKG65511.1	820743719	676	['Guinea']	['09-Oct-2014']	['Ebola virus/H.sapiens-wt/GIN/2014/Makona-Coyah-1355']
GP [Zaire ebolavirus].	AKG65502.1	820743709	676	['Guinea']	['08-Oct-2014']	['Ebola virus/H.sapiens-wt/GIN/2014/Makona-Conakry-1342']
GP [Zaire ebolavirus].	AKG65493.1	820743699	676	['Guinea']	['08-Oct-2014']	['Ebola virus/H.sapiens-wt/GIN/2014/Makona-Conakry-1340']
GP [Zaire ebolavirus].	AKG65484.1	820743689	676	['Guinea']	['08-Oct-2014']	['Ebola virus/H.sapiens-wt/GIN/2014/Makona-Coyah-1339']
GP [Zaire ebolavirus].	AKG65475.1	820743679	676	['Guinea']	['07-Oct-2014']	['Ebola virus/H.sapiens-wt/GIN/2014/Makona-Coyah-1333']
GP [Zaire ebolavirus].	AKG65466.1	820743669	676	['Guinea']	['07-Oct-2014']	['Ebola virus/H.sapiens-wt/GIN/2014/Makona-Kerouane-1331']
GP [Zaire ebolavirus].	AKG65457.1	820743659	676	['Guinea']	['07-Oct-2014']	['Ebola virus/H.sapiens-wt/GIN/2014/Makona-Coyah-1321']
GP [Zaire ebolavirus].	AKG65448.1	820743649	676	['Guinea']	['07-Oct-2014']	['Ebola virus/H.sapiens-wt/GIN/2014/Makona-Coyah-1316']
GP [Zaire ebolavirus].	AKG65439.1	820743639	676	['Guinea']	['06-Oct-2014']	['Ebola virus/H.sapiens-wt/GIN/2014/Makona-Conakry-1298']
GP [Zaire ebolavirus].	AKG65430.1	820743629	676	['Guinea']	['04-Oct-2014']	['Ebola virus/H.sapiens-wt/GIN/2014/Makona-Coyah-1278']
GP [Zaire ebolavirus].	AKG65421.1	820743619	676	['Guinea']	['04-Oct-2014']	['Ebola virus/H.sapiens-wt/GIN/2014/Makona-Coyah-1277']
GP [Zaire ebolavirus].	AKG65412.1	820743609	676	['Guinea']	['04-Oct-2014']	['Ebola virus/H.sapiens-wt/GIN/2014/Makona-Coyah-1274']
GP [Zaire ebolavirus].	AKG65403.1	820743599	676	['Guinea']	['04-Oct-2014']	['Ebola virus/H.sapiens-wt/GIN/2014/Makona-Conakry-1249']
GP [Zaire ebolavirus].	AKG65394.1	820743589	676	['Guinea']	['02-Oct-2014']	['Ebola virus/H.sapiens-wt/GIN/2014/Makona-Dalaba-1211']
GP [Zaire ebolavirus].	AKG65385.1	820743579	676	['Guinea']	['02-Oct-2014']	['Ebola virus/H.sapiens-wt/GIN/2014/Makona-Conakry-1210']
GP [Zaire ebolavirus].	AKG65376.1	820743569	676	['Guinea']	['02-Oct-2014']	['Ebola virus/H.sapiens-wt/GIN/2014/Makona-Conakry-1205']
GP [Zaire ebolavirus].	AKG65367.1	820743559	676	['Guinea']	['28-Sep-2014']	['Ebola virus/H.sapiens-wt/GIN/2014/Makona-Conakry-1193']
GP [Zaire ebolavirus].	AKG65358.1	820743549	676	['Guinea']	['25-Sep-2014']	['Ebola virus/H.sapiens-wt/GIN/2014/Makona-Conakry-1121']
GP [Zaire ebolavirus].	AKG65349.1	820743539	676	['Guinea']	['25-Sep-2014']	['Ebola virus/H.sapiens-wt/GIN/2014/Makona-Conakry-1120']
GP [Zaire ebolavirus].	AKG65340.1	820743529	676	['Guinea']	['24-Sep-2014']	['Ebola virus/H.sapiens-wt/GIN/2014/Makona-Dalaba-1116']
GP [Zaire ebolavirus].	AKG65331.1	820743519	676	['Guinea']	['24-Sep-2014']	['Ebola virus/H.sapiens-wt/GIN/2014/Makona-Dalaba-1104']
GP [Zaire ebolavirus].	AKG65322.1	820743509	676	['Guinea']	['22-Sep-2014']	['Ebola virus/H.sapiens-wt/GIN/2014/Makona-Conakry-1081']
GP [Zaire ebolavirus].	AKG65313.1	820743499	676	['Guinea']	['21-Sep-2014']	['Ebola virus/H.sapiens-wt/GIN/2014/Makona-Forecariah-1069']
GP [Zaire ebolavirus].	AKG65304.1	820743489	676	['Guinea']	['21-Sep-2014']	['Ebola virus/H.sapiens-wt/GIN/2014/Makona-Coyah-1063']
GP [Zaire ebolavirus].	AKG65295.1	820743479	676	['Guinea']	['21-Sep-2014']	['Ebola virus/H.sapiens-wt/GIN/2014/Makona-Conakry-1059']
GP [Zaire ebolavirus].	AKG65286.1	820743469	676	['Guinea']	['20-Sep-2014']	['Ebola virus/H.sapiens-wt/GIN/2014/Makona-Kindia-1047']
GP [Zaire ebolavirus].	AKG65277.1	820743459	676	['Guinea']	['19-Sep-2014']	['Ebola virus/H.sapiens-wt/GIN/2014/Makona-Conakry-1043']
GP [Zaire ebolavirus].	AKG65259.1	820743439	676	['Guinea']	['14-Sep-2014']	['Ebola virus/H.sapiens-wt/GIN/2014/Makona-Conakry-976']
GP [Zaire ebolavirus].	AKG65250.1	820743429	676	['Guinea']	['11-Sep-2014']	['Ebola virus/H.sapiens-wt/GIN/2014/Makona-Coyah-955']
GP [Zaire ebolavirus].	AKG65241.1	820743419	676	['Guinea']	['29-Aug-2014']	['Ebola virus/H.sapiens-wt/GIN/2014/Makona-Dubreka-789']
GP [Zaire ebolavirus].	AKG65232.1	820743409	676	['Guinea']	['28-Aug-2014']	['Ebola virus/H.sapiens-wt/GIN/2014/Makona-Conakry-787']
GP [Zaire ebolavirus].	AKG65223.1	820743399	676	['Guinea']	['28-Aug-2014']	['Ebola virus/H.sapiens-wt/GIN/2014/Makona-Conakry-786']
GP [Zaire ebolavirus].	AKG65214.1	820743389	676	['Guinea']	['26-Aug-2014']	['Ebola virus/H.sapiens-wt/GIN/2014/Makona-Conakry-740']
GP [Zaire ebolavirus].	AKG65205.1	820743379	676	['Guinea']	['22-Aug-2014']	['Ebola virus/H.sapiens-wt/GIN/2014/Makona-Conakry-701']
GP [Zaire ebolavirus].	AKG65196.1	820743369	676	['Guinea']	['21-Aug-2014']	['Ebola virus/H.sapiens-wt/GIN/2014/Makona-Conakry-691']
GP [Zaire ebolavirus].	AKG65187.1	820743359	676	['Guinea']	['20-Aug-2014']	['Ebola virus/H.sapiens-wt/GIN/2014/Makona-Conakry-684']
GP [Zaire ebolavirus].	AKG65178.1	820743349	676	['Guinea']	['19-Aug-2014']	['Ebola virus/H.sapiens-wt/GIN/2014/Makona-Conakry-678']
GP [Zaire ebolavirus].	AKG65169.1	820743339	676	['Guinea']	['16-Aug-2014']	['Ebola virus/H.sapiens-wt/GIN/2014/Makona-Conakry-657']
GP [Zaire ebolavirus].	AKG65160.1	820743329	676	['Guinea']	['15-Aug-2014']	['Ebola virus/H.sapiens-wt/GIN/2014/Makona-Conakry-653']
GP [Zaire ebolavirus].	AKG65151.1	820743319	676	['Guinea']	['14-Aug-2014']	['Ebola virus/H.sapiens-wt/GIN/2014/Makona-Macenta-645']
GP [Zaire ebolavirus].	AKG65142.1	820743309	676	['Guinea']	['12-Aug-2014']	['Ebola virus/H.sapiens-wt/GIN/2014/Makona-Gueckedou-633']
GP [Zaire ebolavirus].	AKG65133.1	820743299	676	['Guinea']	['02-Aug-2014']	['Ebola virus/H.sapiens-wt/GIN/2014/Makona-Conakry-573']
GP [Zaire ebolavirus].	AKG65124.1	820743289	676	['Guinea']	['27-Jul-2014']	['Ebola virus/H.sapiens-wt/GIN/2014/Makona-Kouroussa-531']
GP [Zaire ebolavirus].	AKG65115.1	820743279	676	['Guinea']	['24-Jul-2014']	['Ebola virus/H.sapiens-wt/GIN/2014/Makona-Siguiri-517']
GP [Zaire ebolavirus].	AKG65106.1	820743269	676	['Guinea']	['24-Jul-2014']	['Ebola virus/H.sapiens-wt/GIN/2014/Makona-Conakry-509']
GP [Zaire ebolavirus].	AKG65098.1	820743260	676	['Guinea']	['24-Jul-2014']	['Ebola virus/H.sapiens-wt/GIN/2014/Makona-Conakry-505']
virion spike glycoprotein precursor [Zaire ebolavirus].	AJP15504.1	760243810	676	['Sierra Leone: western urban']	['29-Oct-2014']	['Ebolavirus/H.sapiens-wt/SLE/2014/Makona-J0107']
virion spike glycoprotein precursor [Zaire ebolavirus].	AJP15495.1	760243800	676	['Sierra Leone: western rural']	['28-Oct-2014']	['Ebolavirus/H.sapiens-wt/SLE/2014/Makona-J0106']
virion spike glycoprotein precursor [Zaire ebolavirus].	AJP15486.1	760243790	676	['Sierra Leone: Port Loko']	['29-Oct-2014']	['Ebolavirus/H.sapiens-wt/SLE/2014/Makona-J0105']
virion spike glycoprotein precursor [Zaire ebolavirus].	AJP15477.1	760243780	676	['Sierra Leone: Port Loko']	['29-Oct-2014']	['Ebolavirus/H.sapiens-wt/SLE/2014/Makona-J0104']
virion spike glycoprotein precursor [Zaire ebolavirus].	AJP15468.1	760243770	676	['Sierra Leone: Kambia']	['28-Oct-2014']	['Ebolavirus/H.sapiens-wt/SLE/2014/Makona-J0099']
virion spike glycoprotein precursor [Zaire ebolavirus].	AJP15459.1	760243760	676	['Sierra Leone: western rural']	['28-Oct-2014']	['Ebolavirus/H.sapiens-wt/SLE/2014/Makona-J0098']
virion spike glycoprotein precursor [Zaire ebolavirus].	AJP15451.1	760243751	676	['Sierra Leone: western rural']	['28-Oct-2014']	['Ebolavirus/H.sapiens-wt/SLE/2014/Makona-J0097']
virion spike glycoprotein precursor [Zaire ebolavirus].	AJP15442.1	760243741	676	['Sierra Leone: western rural']	['27-Oct-2014']	['Ebolavirus/H.sapiens-wt/SLE/2014/Makona-J0094']
virion spike glycoprotein precursor [Zaire ebolavirus].	AJP15433.1	760243731	676	['Sierra Leone: western rural']	['24-Oct-2014']	['Ebolavirus/H.sapiens-wt/SLE/2014/Makona-J0093']
virion spike glycoprotein precursor [Zaire ebolavirus].	AJP15424.1	760243721	676	['Sierra Leone: western area']	['25-Oct-2014']	['Ebolavirus/H.sapiens-wt/SLE/2014/Makona-J0091']
virion spike glycoprotein precursor [Zaire ebolavirus].	AJP15415.1	760243711	676	['Sierra Leone: western area']	['23-Oct-2014']	['Ebolavirus/H.sapiens-wt/SLE/2014/Makona-J0089']
virion spike glycoprotein precursor [Zaire ebolavirus].	AJP15406.1	760243701	676	['Sierra Leone: Bombali']	['25-Sep-2014']	['Ebolavirus/H.sapiens-wt/SLE/2014/Makona-J0022']
virion spike glycoprotein precursor [Zaire ebolavirus].	AJP15397.1	760243691	676	['Sierra Leone: Bombali']	['29-Sep-2014']	['Ebolavirus/H.sapiens-wt/SLE/2014/Makona-J0021']
virion spike glycoprotein precursor [Zaire ebolavirus].	AJP15388.1	760243681	676	['Sierra Leone: Bombali']	['25-Sep-2014']	['Ebolavirus/H.sapiens-wt/SLE/2014/Makona-J0020']
virion spike glycoprotein precursor [Zaire ebolavirus].	AJP15379.1	760243671	676	['Sierra Leone: Bombali']	['25-Sep-2014']	['Ebolavirus/H.sapiens-wt/SLE/2014/Makona-J0019']
virion spike glycoprotein precursor [Zaire ebolavirus].	AJP15370.1	760243661	676	['Sierra Leone: Port Loko']	['16-Oct-2014']	['Ebolavirus/H.sapiens-wt/SLE/2014/Makona-J0084']
virion spike glycoprotein precursor [Zaire ebolavirus].	AJP15361.1	760243651	676	['Sierra Leone: Port Loko']	['18-Oct-2014']	['Ebolavirus/H.sapiens-wt/SLE/2014/Makona-J0083']
virion spike glycoprotein precursor [Zaire ebolavirus].	AJP15352.1	760243641	676	['Sierra Leone: western rural']	['16-Oct-2014']	['Ebolavirus/H.sapiens-wt/SLE/2014/Makona-J0082']
virion spike glycoprotein precursor [Zaire ebolavirus].	AJP15343.1	760243631	676	['Sierra Leone: western rural']	['16-Oct-2014']	['Ebolavirus/H.sapiens-wt/SLE/2014/Makona-J0081']
virion spike glycoprotein precursor [Zaire ebolavirus].	AJP15334.1	760243621	676	['Sierra Leone: Port Loko']	['18-Oct-2014']	['Ebolavirus/H.sapiens-wt/SLE/2014/Makona-J0080']
virion spike glycoprotein precursor [Zaire ebolavirus].	AJP15325.1	760243611	676	['Sierra Leone: western rural']	['16-Oct-2014']	['Ebolavirus/H.sapiens-wt/SLE/2014/Makona-J0079']
virion spike glycoprotein precursor [Zaire ebolavirus].	AJP15316.1	760243601	676	['Sierra Leone: Bombali']	['26-Sep-2014']	['Ebolavirus/H.sapiens-wt/SLE/2014/Makona-J0017']
virion spike glycoprotein precursor [Zaire ebolavirus].	AJP15307.1	760243591	676	['Sierra Leone: western urban']	['18-Oct-2014']	['Ebolavirus/H.sapiens-wt/SLE/2014/Makona-J0078']
virion spike glycoprotein precursor [Zaire ebolavirus].	AJP15298.1	760243581	676	['Sierra Leone: western rural']	['17-Oct-2014']	['Ebolavirus/H.sapiens-wt/SLE/2014/Makona-J0077']
virion spike glycoprotein precursor [Zaire ebolavirus].	AJP15289.1	760243571	676	['Sierra Leone: western rural']	['17-Oct-2014']	['Ebolavirus/H.sapiens-wt/SLE/2014/Makona-J0076']
virion spike glycoprotein precursor [Zaire ebolavirus].	AJP15280.1	760243561	676	['Sierra Leone: western rural']	['17-Oct-2014']	['Ebolavirus/H.sapiens-wt/SLE/2014/Makona-J0075']
virion spike glycoprotein precursor [Zaire ebolavirus].	AJP15271.1	760243551	676	['Sierra Leone: western rural']	['30-Sep-2014']	['Ebolavirus/H.sapiens-wt/SLE/2014/Makona-J0016']
virion spike glycoprotein precursor [Zaire ebolavirus].	AJP15262.1	760243541	676	['Sierra Leone: Bombali']	['26-Sep-2014']	['Ebolavirus/H.sapiens-wt/SLE/2014/Makona-J0015']
virion spike glycoprotein precursor [Zaire ebolavirus].	AJP15253.1	760243531	676	['Sierra Leone: Port Loko']	['29-Sep-2014']	['Ebolavirus/H.sapiens-wt/SLE/2014/Makona-J0014']
virion spike glycoprotein precursor [Zaire ebolavirus].	AJP15244.1	760243521	676	['Sierra Leone: western rural']	['13-Oct-2014']	['Ebolavirus/H.sapiens-wt/SLE/2014/Makona-J0074']
virion spike glycoprotein precursor [Zaire ebolavirus].	AJP15235.1	760243511	676	['Sierra Leone: Port Loko']	['12-Oct-2014']	['Ebolavirus/H.sapiens-wt/SLE/2014/Makona-J0073']
virion spike glycoprotein precursor [Zaire ebolavirus].	AJP15226.1	760243501	676	['Sierra Leone: Port Loko']	['09-Oct-2014']	['Ebolavirus/H.sapiens-wt/SLE/2014/Makona-J0072']
virion spike glycoprotein precursor [Zaire ebolavirus].	AJP15217.1	760243491	676	['Sierra Leone: Port Loko']	['09-Oct-2014']	['Ebolavirus/H.sapiens-wt/SLE/2014/Makona-J0071']
virion spike glycoprotein precursor [Zaire ebolavirus].	AJP15208.1	760243481	676	['Sierra Leone: Port Loko']	['09-Oct-2014']	['Ebolavirus/H.sapiens-wt/SLE/2014/Makona-J0070']
virion spike glycoprotein precursor [Zaire ebolavirus].	AJP15199.1	760243471	676	['Sierra Leone: Port Loko']	['28-Sep-2014']	['Ebolavirus/H.sapiens-wt/SLE/2014/Makona-J0009']
virion spike glycoprotein precursor [Zaire ebolavirus].	AJP15190.1	760243461	676	['Sierra Leone: western rural']	['09-Oct-2014']	['Ebolavirus/H.sapiens-wt/SLE/2014/Makona-J0069']
virion spike glycoprotein precursor [Zaire ebolavirus].	AJP15181.1	760243451	676	['Sierra Leone: western rural']	['09-Oct-2014']	['Ebolavirus/H.sapiens-wt/SLE/2014/Makona-J0068']
virion spike glycoprotein precursor [Zaire ebolavirus].	AJP15172.1	760243441	676	['Sierra Leone: Port Loko']	['09-Oct-2014']	['Ebolavirus/H.sapiens-wt/SLE/2014/Makona-J0067']
virion spike glycoprotein precursor [Zaire ebolavirus].	AJP15163.1	760243431	676	['Sierra Leone: western area']	['10-Oct-2014']	['Ebolavirus/H.sapiens-wt/SLE/2014/Makona-J0066']
virion spike glycoprotein precursor [Zaire ebolavirus].	AJP15154.1	760243421	676	['Sierra Leone: western rural']	['09-Oct-2014']	['Ebolavirus/H.sapiens-wt/SLE/2014/Makona-J0065']
virion spike glycoprotein precursor [Zaire ebolavirus].	AJP15145.1	760243411	676	['Sierra Leone: western urban']	['09-Oct-2014']	['Ebolavirus/H.sapiens-wt/SLE/2014/Makona-J0064']
virion spike glycoprotein precursor [Zaire ebolavirus].	AJP15136.1	760243401	676	['Sierra Leone: Port Loko']	['10-Oct-2014']	['Ebolavirus/H.sapiens-wt/SLE/2014/Makona-J0062']
virion spike glycoprotein precursor [Zaire ebolavirus].	AJP15127.1	760243391	676	['Sierra Leone: western urban']	['06-Oct-2014']	['Ebolavirus/H.sapiens-wt/SLE/2014/Makona-J0060']
virion spike glycoprotein precursor [Zaire ebolavirus].	AJP15118.1	760243381	676	['Sierra Leone: western rural']	['08-Oct-2014']	['Ebolavirus/H.sapiens-wt/SLE/2014/Makona-J0059']
virion spike glycoprotein precursor [Zaire ebolavirus].	AJP15109.1	760243371	676	['Sierra Leone: Port Loko']	['08-Oct-2014']	['Ebolavirus/H.sapiens-wt/SLE/2014/Makona-J0058']
virion spike glycoprotein precursor [Zaire ebolavirus].	AJP15100.1	760243361	676	['Sierra Leone: Port Loko']	['06-Oct-2014']	['Ebolavirus/H.sapiens-wt/SLE/2014/Makona-J0055']
virion spike glycoprotein precursor [Zaire ebolavirus].	AJP15091.1	760243346	676	['Sierra Leone: western rural']	['06-Oct-2014']	['Ebolavirus/H.sapiens-wt/SLE/2014/Makona-J0054']
virion spike glycoprotein precursor [Zaire ebolavirus].	AJP15082.1	760243335	676	['Sierra Leone: western rural']	['06-Oct-2014']	['Ebolavirus/H.sapiens-wt/SLE/2014/Makona-J0053']
virion spike glycoprotein precursor [Zaire ebolavirus].	AJP15073.1	760243323	676	['Sierra Leone: western urban']	['08-Oct-2014']	['Ebolavirus/H.sapiens-wt/SLE/2014/Makona-J0052']
virion spike glycoprotein precursor [Zaire ebolavirus].	AJP15064.1	760243312	676	['Sierra Leone: western urban']	['05-Oct-2014']	['Ebolavirus/H.sapiens-wt/SLE/2014/Makona-J0050']
virion spike glycoprotein precursor [Zaire ebolavirus].	AJP15055.1	760243302	676	['Sierra Leone: western urban']	['29-Sep-2014']	['Ebolavirus/H.sapiens-wt/SLE/2014/Makona-J0008']
virion spike glycoprotein precursor [Zaire ebolavirus].	AJP15046.1	760243292	676	['Sierra Leone: Port Loko']	['07-Oct-2014']	['Ebolavirus/H.sapiens-wt/SLE/2014/Makona-J0049']
virion spike glycoprotein precursor [Zaire ebolavirus].	AJP15037.1	760243276	676	['Sierra Leone: western rural']	['05-Oct-2014']	['Ebolavirus/H.sapiens-wt/SLE/2014/Makona-J0048']
virion spike glycoprotein precursor [Zaire ebolavirus].	AJP15028.1	760243263	676	['Sierra Leone: western rural']	['07-Oct-2014']	['Ebolavirus/H.sapiens-wt/SLE/2014/Makona-J0046']
virion spike glycoprotein precursor [Zaire ebolavirus].	AJP15019.1	760243251	676	['Sierra Leone: western urban']	['05-Oct-2014']	['Ebolavirus/H.sapiens-wt/SLE/2014/Makona-J0045']
virion spike glycoprotein precursor [Zaire ebolavirus].	AJP15010.1	760243240	676	['Sierra Leone: western rural']	['05-Oct-2014']	['Ebolavirus/H.sapiens-wt/SLE/2014/Makona-J0044']
virion spike glycoprotein precursor [Zaire ebolavirus].	AJP15001.1	760243228	676	['Sierra Leone: western area']	['04-Oct-2014']	['Ebolavirus/H.sapiens-wt/SLE/2014/Makona-J0043']
virion spike glycoprotein precursor [Zaire ebolavirus].	AJP14992.1	760243211	676	['Sierra Leone: western rural']	['04-Oct-2014']	['Ebolavirus/H.sapiens-wt/SLE/2014/Makona-J0042']
virion spike glycoprotein precursor [Zaire ebolavirus].	AJP14983.1	760243196	676	['Sierra Leone: western area']	['04-Oct-2014']	['Ebolavirus/H.sapiens-wt/SLE/2014/Makona-J0041']
virion spike glycoprotein precursor [Zaire ebolavirus].	AJP14974.1	760243186	676	['Sierra Leone: western area']	['11-Nov-2014']	['Ebolavirus/H.sapiens-wt/SLE/2014/Makona-J0175']
virion spike glycoprotein precursor [Zaire ebolavirus].	AJP14965.1	760243176	676	['Sierra Leone: western area']	['11-Nov-2014']	['Ebolavirus/H.sapiens-wt/SLE/2014/Makona-J0174']
virion spike glycoprotein precursor [Zaire ebolavirus].	AJP14956.1	760243166	676	['Sierra Leone: western rural']	['10-Nov-2014']	['Ebolavirus/H.sapiens-wt/SLE/2014/Makona-J0171']
virion spike glycoprotein precursor [Zaire ebolavirus].	AJP14947.1	760243156	676	['Sierra Leone: western urban']	['09-Nov-2014']	['Ebolavirus/H.sapiens-wt/SLE/2014/Makona-J0169']
virion spike glycoprotein precursor [Zaire ebolavirus].	AJP14938.1	760243146	676	['Sierra Leone: western area']	['11-Nov-2014']	['Ebolavirus/H.sapiens-wt/SLE/2014/Makona-J0168']
virion spike glycoprotein precursor [Zaire ebolavirus].	AJP14929.1	760243135	676	['Sierra Leone: western urban']	['08-Nov-2014']	['Ebolavirus/H.sapiens-wt/SLE/2014/Makona-J0166']
virion spike glycoprotein precursor [Zaire ebolavirus].	AJP14920.1	760243123	676	['Sierra Leone: western urban']	['08-Nov-2014']	['Ebolavirus/H.sapiens-wt/SLE/2014/Makona-J0165']
virion spike glycoprotein precursor [Zaire ebolavirus].	AJP14911.1	760243111	676	['Sierra Leone: Port Loko']	['08-Nov-2014']	['Ebolavirus/H.sapiens-wt/SLE/2014/Makona-J0163']
virion spike glycoprotein precursor [Zaire ebolavirus].	AJP14902.1	760243099	676	['Sierra Leone: western urban']	['08-Nov-2014']	['Ebolavirus/H.sapiens-wt/SLE/2014/Makona-J0161']
virion spike glycoprotein precursor [Zaire ebolavirus].	AJP14893.1	760243087	676	['Sierra Leone: western rural']	['08-Nov-2014']	['Ebolavirus/H.sapiens-wt/SLE/2014/Makona-J0158']
virion spike glycoprotein precursor [Zaire ebolavirus].	AJP14884.1	760243076	676	['Sierra Leone: western urban']	['06-Nov-2014']	['Ebolavirus/H.sapiens-wt/SLE/2014/Makona-J0157']
virion spike glycoprotein precursor [Zaire ebolavirus].	AJP14875.1	760243058	676	['Sierra Leone: western urban']	['07-Nov-2014']	['Ebolavirus/H.sapiens-wt/SLE/2014/Makona-J0156']
virion spike glycoprotein precursor [Zaire ebolavirus].	AJP14866.1	760243046	676	['Sierra Leone: western area']	['07-Nov-2014']	['Ebolavirus/H.sapiens-wt/SLE/2014/Makona-J0155']
virion spike glycoprotein precursor [Zaire ebolavirus].	AJP14857.1	760243035	676	['Sierra Leone: western urban']	['06-Nov-2014']	['Ebolavirus/H.sapiens-wt/SLE/2014/Makona-J0150']
virion spike glycoprotein precursor [Zaire ebolavirus].	AJP14848.1	760243024	676	['Sierra Leone: western urban']	['07-Nov-2014']	['Ebolavirus/H.sapiens-wt/SLE/2014/Makona-J0149']
virion spike glycoprotein precursor [Zaire ebolavirus].	AJP14839.1	760243012	676	['Sierra Leone: Port Loko']	['03-Oct-2014']	['Ebolavirus/H.sapiens-wt/SLE/2014/Makona-J0036']
virion spike glycoprotein precursor [Zaire ebolavirus].	AJP14830.1	760243001	676	['Sierra Leone: western rural']	['06-Nov-2014']	['Ebolavirus/H.sapiens-wt/SLE/2014/Makona-J0145']
virion spike glycoprotein precursor [Zaire ebolavirus].	AJP14821.1	760242989	676	['Sierra Leone: Port Loko']	['03-Oct-2014']	['Ebolavirus/H.sapiens-wt/SLE/2014/Makona-J0033']
virion spike glycoprotein precursor [Zaire ebolavirus].	AJP14812.1	760242971	676	['Sierra Leone: Port Loko']	['30-Sep-2014']	['Ebolavirus/H.sapiens-wt/SLE/2014/Makona-J0032']
virion spike glycoprotein precursor [Zaire ebolavirus].	AJP14803.1	760242959	676	['Sierra Leone: western urban']	['03-Nov-2014']	['Ebolavirus/H.sapiens-wt/SLE/2014/Makona-J0142']
virion spike glycoprotein precursor [Zaire ebolavirus].	AJP14794.1	760242942	676	['Sierra Leone: western rural']	['04-Nov-2014']	['Ebolavirus/H.sapiens-wt/SLE/2014/Makona-J0141']
virion spike glycoprotein precursor [Zaire ebolavirus].	AJP14785.1	760242930	676	['Sierra Leone: Port Loko']	['29-Sep-2014']	['Ebolavirus/H.sapiens-wt/SLE/2014/Makona-J0029']
virion spike glycoprotein precursor [Zaire ebolavirus].	AJP14776.1	760242918	676	['Sierra Leone: western urban']	['30-Oct-2014']	['Ebolavirus/H.sapiens-wt/SLE/2014/Makona-J0139']
virion spike glycoprotein precursor [Zaire ebolavirus].	AJP14767.1	760242906	676	['Sierra Leone: western urban']	['01-Nov-2014']	['Ebolavirus/H.sapiens-wt/SLE/2014/Makona-J0138']
virion spike glycoprotein precursor [Zaire ebolavirus].	AJP14758.1	760242894	676	['Sierra Leone: western rural']	['01-Nov-2014']	['Ebolavirus/H.sapiens-wt/SLE/2014/Makona-J0137']
virion spike glycoprotein precursor [Zaire ebolavirus].	AJP14749.1	760242882	676	['Sierra Leone: western rural']	['01-Nov-2014']	['Ebolavirus/H.sapiens-wt/SLE/2014/Makona-J0136']
virion spike glycoprotein precursor [Zaire ebolavirus].	AJP14740.1	760242871	676	['Sierra Leone: Bombali']	['02-Oct-2014']	['Ebolavirus/H.sapiens-wt/SLE/2014/Makona-J0028']
virion spike glycoprotein precursor [Zaire ebolavirus].	AJP14731.1	760242860	676	['Sierra Leone: western rural']	['31-Oct-2014']	['Ebolavirus/H.sapiens-wt/SLE/2014/Makona-J0134']
virion spike glycoprotein precursor [Zaire ebolavirus].	AJP14722.1	760242848	676	['Sierra Leone: western rural']	['31-Oct-2014']	['Ebolavirus/H.sapiens-wt/SLE/2014/Makona-J0133']
virion spike glycoprotein precursor [Zaire ebolavirus].	AJP14713.1	760242836	676	['Sierra Leone: Port Loko']	['30-Oct-2014']	['Ebolavirus/H.sapiens-wt/SLE/2014/Makona-J0131']
virion spike glycoprotein precursor [Zaire ebolavirus].	AJP14704.1	760242817	676	['Sierra Leone: Port Loko']	['02-Nov-2014']	['Ebolavirus/H.sapiens-wt/SLE/2014/Makona-J0130']
virion spike glycoprotein precursor [Zaire ebolavirus].	AJP14695.1	760242805	676	['Sierra Leone: Bombali']	['02-Oct-2014']	['Ebolavirus/H.sapiens-wt/SLE/2014/Makona-J0027']
virion spike glycoprotein precursor [Zaire ebolavirus].	AJP14686.1	760242793	676	['Sierra Leone: western urban']	['31-Oct-2014']	['Ebolavirus/H.sapiens-wt/SLE/2014/Makona-J0128']
virion spike glycoprotein precursor [Zaire ebolavirus].	AJP14677.1	760242781	676	['Sierra Leone: western urban']	['30-Oct-2014']	['Ebolavirus/H.sapiens-wt/SLE/2014/Makona-J0127']
virion spike glycoprotein precursor [Zaire ebolavirus].	AJP14668.1	760242769	676	['Sierra Leone: western rural']	['31-Oct-2014']	['Ebolavirus/H.sapiens-wt/SLE/2014/Makona-J0126']
virion spike glycoprotein precursor [Zaire ebolavirus].	AJP14659.1	760242757	676	['Sierra Leone: western rural']	['31-Oct-2014']	['Ebolavirus/H.sapiens-wt/SLE/2014/Makona-J0125']
virion spike glycoprotein precursor [Zaire ebolavirus].	AJP14650.1	760242746	676	['Sierra Leone: western area']	['02-Nov-2014']	['Ebolavirus/H.sapiens-wt/SLE/2014/Makona-J0124']
virion spike glycoprotein precursor [Zaire ebolavirus].	AJP14641.1	760242734	676	['Sierra Leone: western rural']	['01-Nov-2014']	['Ebolavirus/H.sapiens-wt/SLE/2014/Makona-J0123']
virion spike glycoprotein precursor [Zaire ebolavirus].	AJP14632.1	760242722	676	['Sierra Leone: western urban']	['29-Oct-2014']	['Ebolavirus/H.sapiens-wt/SLE/2014/Makona-J0122']
virion spike glycoprotein precursor [Zaire ebolavirus].	AJP14623.1	760242710	676	['Sierra Leone: Bombali']	['02-Oct-2014']	['Ebolavirus/H.sapiens-wt/SLE/2014/Makona-J0026']
virion spike glycoprotein precursor [Zaire ebolavirus].	AJP14614.1	760242698	676	['Sierra Leone: western urban']	['29-Oct-2014']	['Ebolavirus/H.sapiens-wt/SLE/2014/Makona-J0121']
virion spike glycoprotein precursor [Zaire ebolavirus].	AJP14605.1	760242686	676	['Sierra Leone: western rural']	['28-Sep-2014']	['Ebolavirus/H.sapiens-wt/SLE/2014/Makona-J0004']
virion spike glycoprotein precursor [Zaire ebolavirus].	AJP14596.1	760242674	676	['Sierra Leone: western urban']	['30-Oct-2014']	['Ebolavirus/H.sapiens-wt/SLE/2014/Makona-J0119']
virion spike glycoprotein precursor [Zaire ebolavirus].	AJP14587.1	760242662	676	['Sierra Leone: western rural']	['02-Oct-2014']	['Ebolavirus/H.sapiens-wt/SLE/2014/Makona-J0025']
virion spike glycoprotein precursor [Zaire ebolavirus].	AJP14578.1	760242651	676	['Sierra Leone: western rural']	['31-Oct-2014']	['Ebolavirus/H.sapiens-wt/SLE/2014/Makona-J0117']
virion spike glycoprotein precursor [Zaire ebolavirus].	AJP14569.1	760242639	676	['Sierra Leone: western rural']	['30-Oct-2014']	['Ebolavirus/H.sapiens-wt/SLE/2014/Makona-J0116']
virion spike glycoprotein precursor [Zaire ebolavirus].	AJP14560.1	760242627	676	['Sierra Leone: western rural']	['29-Sep-2014']	['Ebolavirus/H.sapiens-wt/SLE/2014/Makona-J0024']
virion spike glycoprotein precursor [Zaire ebolavirus].	AJP14551.1	760242615	676	['Sierra Leone: western urban']	['30-Oct-2014']	['Ebolavirus/H.sapiens-wt/SLE/2014/Makona-J0113']
virion spike glycoprotein precursor [Zaire ebolavirus].	AJP14542.1	760242604	676	['Sierra Leone: western area']	['31-Oct-2014']	['Ebolavirus/H.sapiens-wt/SLE/2014/Makona-J0112']
virion spike glycoprotein precursor [Zaire ebolavirus].	AJP14533.1	760242594	676	['Sierra Leone: western urban']	['31-Oct-2014']	['Ebolavirus/H.sapiens-wt/SLE/2014/Makona-J0110']
virion spike glycoprotein precursor [Zaire ebolavirus].	AJP14524.1	760242584	676	['Sierra Leone: western rural']	['28-Oct-2014']	['Ebolavirus/H.sapiens-wt/SLE/2014/Makona-J0108']
virion spike glycoprotein precursor [Zaire ebolavirus].	AJP14515.1	760242574	676	['Sierra Leone: Port Loko']	['29-Oct-2014']	['Ebolavirus/H.sapiens-wt/SLE/2014/Makona-J0103']
virion spike glycoprotein precursor [Zaire ebolavirus].	AJP14506.1	760242562	676	['Sierra Leone: Port Loko']	['27-Oct-2014']	['Ebolavirus/H.sapiens-wt/SLE/2014/Makona-J0102']
virion spike glycoprotein precursor [Zaire ebolavirus].	AJP14497.1	760242550	676	['Sierra Leone: Port Loko']	['29-Oct-2014']	['Ebolavirus/H.sapiens-wt/SLE/2014/Makona-J0101']
virion spike glycoprotein precursor [Zaire ebolavirus].	AJP14488.1	760242539	676	['Sierra Leone: Kambia']	['26-Oct-2014']	['Ebolavirus/H.sapiens-wt/SLE/2014/Makona-J0100']
virion spike glycoprotein precursor [Zaire ebolavirus].	AJP14479.1	760242527	676	['Sierra Leone: western urban']	['27-Oct-2014']	['Ebolavirus/H.sapiens-wt/SLE/2014/Makona-J0096']
virion spike glycoprotein precursor [Zaire ebolavirus].	AJP14470.1	760242515	676	['Sierra Leone: western urban']	['27-Oct-2014']	['Ebolavirus/H.sapiens-wt/SLE/2014/Makona-J0095']
virion spike glycoprotein precursor [Zaire ebolavirus].	AJP14461.1	760242503	676	['Sierra Leone: western rural']	['01-Oct-2014']	['Ebolavirus/H.sapiens-wt/SLE/2014/Makona-J0023']
virion spike glycoprotein precursor [Zaire ebolavirus].	AJP14452.1	760242491	676	['Sierra Leone: Port Loko']	['28-Sep-2014']	['Ebolavirus/H.sapiens-wt/SLE/2014/Makona-J0003']
virion spike glycoprotein precursor [Zaire ebolavirus].	AJP14443.1	760242479	676	['Sierra Leone: western rural']	['25-Oct-2014']	['Ebolavirus/H.sapiens-wt/SLE/2014/Makona-J0092']
virion spike glycoprotein precursor [Zaire ebolavirus].	AJP14434.1	760242468	676	['Sierra Leone: western urban']	['23-Oct-2014']	['Ebolavirus/H.sapiens-wt/SLE/2014/Makona-J0090']
virion spike glycoprotein precursor [Zaire ebolavirus].	AJP14425.1	760242458	676	['Sierra Leone: Port Loko']	['20-Oct-2014']	['Ebolavirus/H.sapiens-wt/SLE/2014/Makona-J0088']
virion spike glycoprotein precursor [Zaire ebolavirus].	AJP14416.1	760242448	676	['Sierra Leone: Port Loko']	['23-Oct-2014']	['Ebolavirus/H.sapiens-wt/SLE/2014/Makona-J0087']
virion spike glycoprotein precursor [Zaire ebolavirus].	AJP14399.1	760242426	676	['Sierra Leone: Port Loko']	['17-Oct-2014']	['Ebolavirus/H.sapiens-wt/SLE/2014/Makona-J0085']
virion spike glycoprotein precursor [Zaire ebolavirus].	AJP14390.1	760242415	676	['Sierra Leone: western rural']	['30-Sep-2014']	['Ebolavirus/H.sapiens-wt/SLE/2014/Makona-J0018']
virion spike glycoprotein precursor [Zaire ebolavirus].	AJP14381.1	760242403	676	['Sierra Leone: Port Loko']	['28-Sep-2014']	['Ebolavirus/H.sapiens-wt/SLE/2014/Makona-J0013']
virion spike glycoprotein precursor [Zaire ebolavirus].	AJP14372.1	760242391	676	['Sierra Leone: Port Loko']	['29-Sep-2014']	['Ebolavirus/H.sapiens-wt/SLE/2014/Makona-J0012']
virion spike glycoprotein precursor [Zaire ebolavirus].	AJP14363.1	760242379	676	['Sierra Leone: Port Loko']	['29-Sep-2014']	['Ebolavirus/H.sapiens-wt/SLE/2014/Makona-J0011']
virion spike glycoprotein precursor [Zaire ebolavirus].	AJP14354.1	760242367	676	['Sierra Leone: western urban']	['27-Sep-2014']	['Ebolavirus/H.sapiens-wt/SLE/2014/Makona-J0002']
virion spike glycoprotein precursor [Zaire ebolavirus].	AJP14345.1	760242357	676	['Sierra Leone: Port Loko']	['28-Sep-2014']	['Ebolavirus/H.sapiens-wt/SLE/2014/Makona-J0010']
virion spike glycoprotein precursor [Zaire ebolavirus].	AJP14336.1	760242347	676	['Sierra Leone: Port Loko']	['10-Oct-2014']	['Ebolavirus/H.sapiens-wt/SLE/2014/Makona-J0063']
virion spike glycoprotein precursor [Zaire ebolavirus].	AJP14327.1	760242337	676	['Sierra Leone: Port Loko']	['10-Oct-2014']	['Ebolavirus/H.sapiens-wt/SLE/2014/Makona-J0061']
virion spike glycoprotein precursor [Zaire ebolavirus].	AJP14318.1	760242326	676	['Sierra Leone: western rural']	['27-Sep-2014']	['Ebolavirus/H.sapiens-wt/SLE/2014/Makona-J0001']
virion spike glycoprotein precursor [Zaire ebolavirus].	AJP14309.1	760242308	676	['Sierra Leone: Port Loko']	['05-Oct-2014']	['Ebolavirus/H.sapiens-wt/SLE/2014/Makona-J0057']
virion spike glycoprotein precursor [Zaire ebolavirus].	AJP14300.1	760242297	676	['Sierra Leone: Port Loko']	['08-Oct-2014']	['Ebolavirus/H.sapiens-wt/SLE/2014/Makona-J0056']
virion spike glycoprotein precursor [Zaire ebolavirus].	AJP14291.1	760242285	676	['Sierra Leone: western urban']	['07-Oct-2014']	['Ebolavirus/H.sapiens-wt/SLE/2014/Makona-J0051']
virion spike glycoprotein precursor [Zaire ebolavirus].	AJP14282.1	760242274	676	['Sierra Leone: western urban']	['05-Oct-2014']	['Ebolavirus/H.sapiens-wt/SLE/2014/Makona-J0047']
virion spike glycoprotein precursor [Zaire ebolavirus].	AJP14273.1	760242263	676	['Sierra Leone: western rural']	['27-Sep-2014']	['Ebolavirus/H.sapiens-wt/SLE/2014/Makona-J0007']
virion spike glycoprotein precursor [Zaire ebolavirus].	AJP14264.1	760242252	676	['Sierra Leone: western rural']	['28-Sep-2014']	['Ebolavirus/H.sapiens-wt/SLE/2014/Makona-J0006']
virion spike glycoprotein precursor [Zaire ebolavirus].	AJP14255.1	760242241	676	['Sierra Leone: western area']	['04-Oct-2014']	['Ebolavirus/H.sapiens-wt/SLE/2014/Makona-J0040']
virion spike glycoprotein precursor [Zaire ebolavirus].	AJP14246.1	760242229	676	['Sierra Leone: western rural']	['26-Sep-2014']	['Ebolavirus/H.sapiens-wt/SLE/2014/Makona-J0005']
virion spike glycoprotein precursor [Zaire ebolavirus].	AJP14237.1	760242217	676	['Sierra Leone: western rural']	['11-Nov-2014']	['Ebolavirus/H.sapiens-wt/SLE/2014/Makona-J0173']
virion spike glycoprotein precursor [Zaire ebolavirus].	AJP14228.1	760242205	676	['Sierra Leone: western rural']	['11-Nov-2014']	['Ebolavirus/H.sapiens-wt/SLE/2014/Makona-J0172']
virion spike glycoprotein precursor [Zaire ebolavirus].	AJP14219.1	760242193	676	['Sierra Leone: western urban']	['10-Nov-2014']	['Ebolavirus/H.sapiens-wt/SLE/2014/Makona-J0170']
virion spike glycoprotein precursor [Zaire ebolavirus].	AJP14210.1	760242182	676	['Sierra Leone: western urban']	['08-Nov-2014']	['Ebolavirus/H.sapiens-wt/SLE/2014/Makona-J0167']
virion spike glycoprotein precursor [Zaire ebolavirus].	AJP14201.1	760242170	676	['Sierra Leone: western rural']	['09-Nov-2014']	['Ebolavirus/H.sapiens-wt/SLE/2014/Makona-J0164']
virion spike glycoprotein precursor [Zaire ebolavirus].	AJP14192.1	760242159	676	['Sierra Leone: Kambia']	['09-Nov-2014']	['Ebolavirus/H.sapiens-wt/SLE/2014/Makona-J0162']
virion spike glycoprotein precursor [Zaire ebolavirus].	AJP14183.1	760242149	676	['Sierra Leone: western rural']	['07-Nov-2014']	['Ebolavirus/H.sapiens-wt/SLE/2014/Makona-J0160']
virion spike glycoprotein precursor [Zaire ebolavirus].	AJP14174.1	760242138	676	['Sierra Leone: Port Loko']	['03-Oct-2014']	['Ebolavirus/H.sapiens-wt/SLE/2014/Makona-J0039']
virion spike glycoprotein precursor [Zaire ebolavirus].	AJP14165.1	760242126	676	['Sierra Leone: western rural']	['05-Nov-2014']	['Ebolavirus/H.sapiens-wt/SLE/2014/Makona-J0159']
virion spike glycoprotein precursor [Zaire ebolavirus].	AJP14156.1	760242115	676	['Sierra Leone: Port Loko']	['30-Sep-2014']	['Ebolavirus/H.sapiens-wt/SLE/2014/Makona-J0038']
virion spike glycoprotein precursor [Zaire ebolavirus].	AJP14147.1	760242103	676	['Sierra Leone: western area']	['07-Nov-2014']	['Ebolavirus/H.sapiens-wt/SLE/2014/Makona-J0154']
virion spike glycoprotein precursor [Zaire ebolavirus].	AJP14138.1	760242091	676	['Sierra Leone: western rural']	['07-Nov-2014']	['Ebolavirus/H.sapiens-wt/SLE/2014/Makona-J0153']
virion spike glycoprotein precursor [Zaire ebolavirus].	AJP14129.1	760242079	676	['Sierra Leone: Port Loko']	['03-Oct-2014']	['Ebolavirus/H.sapiens-wt/SLE/2014/Makona-J0037']
virion spike glycoprotein precursor [Zaire ebolavirus].	AJP14120.1	760242068	676	['Sierra Leone: western rural']	['07-Nov-2014']	['Ebolavirus/H.sapiens-wt/SLE/2014/Makona-J0152']
virion spike glycoprotein precursor [Zaire ebolavirus].	AJP14111.1	760242056	676	['Sierra Leone: western rural']	['07-Nov-2014']	['Ebolavirus/H.sapiens-wt/SLE/2014/Makona-J0151']
virion spike glycoprotein precursor [Zaire ebolavirus].	AJP14102.1	760242044	676	['Sierra Leone: western rural']	['06-Nov-2014']	['Ebolavirus/H.sapiens-wt/SLE/2014/Makona-J0148']
virion spike glycoprotein precursor [Zaire ebolavirus].	AJP14093.1	760242032	676	['Sierra Leone: western urban']	['07-Nov-2014']	['Ebolavirus/H.sapiens-wt/SLE/2014/Makona-J0147']
virion spike glycoprotein precursor [Zaire ebolavirus].	AJP14084.1	760242021	676	['Sierra Leone: western urban']	['07-Nov-2014']	['Ebolavirus/H.sapiens-wt/SLE/2014/Makona-J0146']
virion spike glycoprotein precursor [Zaire ebolavirus].	AJP14075.1	760242010	676	['Sierra Leone: Port Loko']	['01-Oct-2014']	['Ebolavirus/H.sapiens-wt/SLE/2014/Makona-J0035']
virion spike glycoprotein precursor [Zaire ebolavirus].	AJP14066.1	760241998	676	['Sierra Leone: Port Loko']	['30-Sep-2014']	['Ebolavirus/H.sapiens-wt/SLE/2014/Makona-J0034']
virion spike glycoprotein precursor [Zaire ebolavirus].	AJP14057.1	760241986	676	['Sierra Leone: Port Loko']	['03-Oct-2014']	['Ebolavirus/H.sapiens-wt/SLE/2014/Makona-J0031']
virion spike glycoprotein precursor [Zaire ebolavirus].	AJP14048.1	760241974	676	['Sierra Leone: Port Loko']	['03-Oct-2014']	['Ebolavirus/H.sapiens-wt/SLE/2014/Makona-J0030']
virion spike glycoprotein precursor [Zaire ebolavirus].	AJP14039.1	760241963	676	['Sierra Leone: Kambia']	['04-Nov-2014']	['Ebolavirus/H.sapiens-wt/SLE/2014/Makona-J0144']
virion spike glycoprotein precursor [Zaire ebolavirus].	AJP14030.1	760241951	676	['Sierra Leone: Kambia']	['04-Nov-2014']	['Ebolavirus/H.sapiens-wt/SLE/2014/Makona-J0143']
virion spike glycoprotein precursor [Zaire ebolavirus].	AJP14021.1	760241938	676	['Sierra Leone: western rural']	['30-Oct-2014']	['Ebolavirus/H.sapiens-wt/SLE/2014/Makona-J0140']
virion spike glycoprotein precursor [Zaire ebolavirus].	AJP14012.1	760241926	676	['Sierra Leone: western rural']	['03-Nov-2014']	['Ebolavirus/H.sapiens-wt/SLE/2014/Makona-J0135']
virion spike glycoprotein precursor [Zaire ebolavirus].	AJP14003.1	760241914	676	['Sierra Leone: western urban']	['02-Nov-2014']	['Ebolavirus/H.sapiens-wt/SLE/2014/Makona-J0132']
virion spike glycoprotein precursor [Zaire ebolavirus].	AJP13994.1	760241900	676	['Sierra Leone: western urban']	['02-Nov-2014']	['Ebolavirus/H.sapiens-wt/SLE/2014/Makona-J0129']
virion spike glycoprotein precursor [Zaire ebolavirus].	AJP13985.1	760241888	676	['Sierra Leone: western rural']	['30-Oct-2014']	['Ebolavirus/H.sapiens-wt/SLE/2014/Makona-J0120']
virion spike glycoprotein precursor [Zaire ebolavirus].	AJP13976.1	760241877	676	['Sierra Leone: western rural']	['31-Oct-2014']	['Ebolavirus/H.sapiens-wt/SLE/2014/Makona-J0118']
virion spike glycoprotein precursor [Zaire ebolavirus].	AJP13967.1	760241865	676	['Sierra Leone: Port Loko']	['29-Oct-2014']	['Ebolavirus/H.sapiens-wt/SLE/2014/Makona-J0115']
virion spike glycoprotein precursor [Zaire ebolavirus].	AJP13958.1	760241853	676	['Sierra Leone: Port Loko']	['29-Oct-2014']	['Ebolavirus/H.sapiens-wt/SLE/2014/Makona-J0114']
virion spike glycoprotein precursor [Zaire ebolavirus].	AJP13949.1	760241841	676	['Sierra Leone: western urban']	['30-Oct-2014']	['Ebolavirus/H.sapiens-wt/SLE/2014/Makona-J0111']
virion spike glycoprotein precursor [Zaire ebolavirus].	AJP13940.1	760241829	676	['Sierra Leone: western urban']	['31-Oct-2014']	['Ebolavirus/H.sapiens-wt/SLE/2014/Makona-J0109']
GP [Zaire ebolavirus].	AKI84247.1	824041060	676	['Democratic Republic of the Congo']	['16-Aug-2014']	['Ebola virus/H.sapiens-wt/COD/2014/Lomela-Lokolia-B11']
glycoprotein precursor [Zaire ebolavirus].	AKI82628.1	824038383	676	N/A	N/A	N/A
glycoprotein precursor [Zaire ebolavirus].	AKI82623.1	824038305	676	N/A	N/A	N/A
virion spike glycoprotein precursor [Zaire ebolavirus].	AIY27576.1	724722352	676	['Liberia']	['03-Aug-2014']	['Ebola virus/H.sapiens-wt/LBR/2014/Makona-201403007']
virion spike glycoprotein precursor [Zaire ebolavirus].	AKI84267.1	824041182	676	['Zaire']	['1995']	['Zaire ebolavirus H. sapiens-tc/ZAI/1995/Zaire-199510621']
virion spike glycoprotein precursor [Zaire ebolavirus].	AKI84258.1	824041129	676	['Sierra Leone']	['2014']	['Zaire ebolavirus/H.sapiens-tc/SL/2014/Makona-SL3864.1']
virion spike glycoprotein precursor [Zaire ebolavirus].	AJF38895.1	751141814	676	['Italy']	['25-Nov-2014']	['Ebola virus/H.sapiens-tc/SLE/2014/Makona-Italy-INMI1']
spike glycoprotein [Zaire ebolavirus].	AKI84242.1	824041009	676	['Liberia']	['12-Jul-2014']	['Ebola virus/H.sapiens-wt/LBR/2014/Makona-EM_080269']
spike glycoprotein [Zaire ebolavirus].	AKI84233.1	824040996	676	['Sierra Leone']	['12-Jul-2014']	['Ebola virus/H.sapiens-wt/SLE/2014/Makona-EM_080265']
spike glycoprotein [Zaire ebolavirus].	AKI84224.1	824040983	676	['Liberia']	['12-Jul-2014']	['Ebola virus/H.sapiens-wt/LBR/2014/Makona-EM_080261']
spike glycoprotein [Zaire ebolavirus].	AKI84215.1	824040971	676	['Guinea']	['10-Jul-2014']	['Ebola virus/H.sapiens-wt/GIN/2014/Makona-EM_080253']
spike glycoprotein [Zaire ebolavirus].	AKI84206.1	824040959	676	['Liberia']	['04-Jul-2014']	['Ebola virus/H.sapiens-wt/LBR/2014/Makona-EM_080223']
spike glycoprotein [Zaire ebolavirus].	AKI84197.1	824040947	676	['Liberia']	['03-Jul-2014']	['Ebola virus/H.sapiens-wt/LBR/2014/Makona-EM_080213']
spike glycoprotein [Zaire ebolavirus].	AKI84188.1	824040933	676	['Liberia']	['29-Jun-2014']	['Ebola virus/H.sapiens-wt/LBR/2014/Makona-EM_080193']
spike glycoprotein [Zaire ebolavirus].	AKI84179.1	824040917	676	['Sierra Leone']	['26-Jun-2014']	['Ebola virus/H.sapiens-wt/SLE/2014/Makona-EM_080165']
spike glycoprotein [Zaire ebolavirus].	AKI84170.1	824040905	676	['Guinea']	['25-Jun-2014']	['Ebola virus/H.sapiens-wt/GIN/2014/Makona-EM_080141']
spike glycoprotein [Zaire ebolavirus].	AKI84161.1	824040891	676	['Sierra Leone']	['24-Jun-2014']	['Ebola virus/H.sapiens-wt/SLE/2014/Makona-EM_080132']
spike glycoprotein [Zaire ebolavirus].	AKI84152.1	824040878	676	['Guinea']	['22-Jun-2014']	['Ebola virus/H.sapiens-wt/GIN/2014/Makona-EM_080076']
spike glycoprotein [Zaire ebolavirus].	AKI84143.1	824040866	676	['Liberia']	['20-Jun-2014']	['Ebola virus/H.sapiens-wt/LBR/2014/Makona-EM_080067']
spike glycoprotein [Zaire ebolavirus].	AKI84134.1	824040854	676	['Liberia']	['20-Jun-2014']	['Ebola virus/H.sapiens-wt/LBR/2014/Makona-EM_080066']
spike glycoprotein [Zaire ebolavirus].	AKI84125.1	824040842	676	['Liberia']	['20-Jun-2014']	['Ebola virus/H.sapiens-wt/LBR/2014/Makona-EM_080065']
spike glycoprotein [Zaire ebolavirus].	AKI84116.1	824040829	676	['Liberia']	['20-Jun-2014']	['Ebola virus/H.sapiens-wt/LBR/2014/Makona-EM_080064']
spike glycoprotein [Zaire ebolavirus].	AKI84107.1	824040816	676	['Guinea']	['20-Jun-2014']	['Ebola virus/H.sapiens-wt/GIN/2014/Makona-EM_080063']
spike glycoprotein [Zaire ebolavirus].	AKI84098.1	824040803	676	['Sierra Leone']	['15-Jun-2014']	['Ebola virus/H.sapiens-wt/SLE/2014/Makona-EM_080011']
spike glycoprotein [Zaire ebolavirus].	AKI84089.1	824040790	676	['Sierra Leone']	['14-Jun-2014']	['Ebola virus/H.sapiens-wt/SLE/2014/Makona-EM_080003']
spike glycoprotein [Zaire ebolavirus].	AKI84080.1	824040778	676	['Sierra Leone']	['13-Jun-2014']	['Ebola virus/H.sapiens-wt/SLE/2014/Makona-EM_079983']
spike glycoprotein [Zaire ebolavirus].	AKI84071.1	824040764	676	['Guinea']	['10-Jun-2014']	['Ebola virus/H.sapiens-wt/GIN/2014/Makona-EM_079915']
spike glycoprotein [Zaire ebolavirus].	AKI84062.1	824040751	676	['Guinea']	['10-Jun-2014']	['Ebola virus/H.sapiens-wt/GIN/2014/Makona-EM_079914']
spike glycoprotein [Zaire ebolavirus].	AKI84053.1	824040739	676	['Guinea']	['09-Jun-2014']	['Ebola virus/H.sapiens-wt/GIN/2014/Makona-EM_079913']
spike glycoprotein [Zaire ebolavirus].	AKI84044.1	824040726	676	['Guinea']	['09-Jun-2014']	['Ebola virus/H.sapiens-wt/GIN/2014/Makona-EM_079912']
spike glycoprotein [Zaire ebolavirus].	AKI84035.1	824040714	676	['Guinea']	['09-Jun-2014']	['Ebola virus/H.sapiens-wt/GIN/2014/Makona-EM_079911']
spike glycoprotein [Zaire ebolavirus].	AKI84026.1	824040702	676	['Guinea']	['09-Jun-2014']	['Ebola virus/H.sapiens-wt/GIN/2014/Makona-EM_079910']
spike glycoprotein [Zaire ebolavirus].	AKI84017.1	824040688	676	['Guinea']	['05-Jun-2014']	['Ebola virus/H.sapiens-wt/GIN/2014/Makona-EM_079880']
spike glycoprotein [Zaire ebolavirus].	AKI84008.1	824040673	676	['Guinea']	['05-Jun-2014']	['Ebola virus/H.sapiens-wt/GIN/2014/Makona-EM_079876']
spike glycoprotein [Zaire ebolavirus].	AKI83999.1	824040661	676	['Guinea']	['01-Jun-2014']	['Ebola virus/H.sapiens-wt/GIN/2014/Makona-EM_079859']
spike glycoprotein [Zaire ebolavirus].	AKI83990.1	824040648	676	['Guinea']	['28-May-2014']	['Ebola virus/H.sapiens-wt/GIN/2014/Makona-EM_079815']
spike glycoprotein [Zaire ebolavirus].	AKI83981.1	824040636	676	['Guinea']	['24-May-2014']	['Ebola virus/H.sapiens-wt/GIN/2014/Makona-EM_079775']
spike glycoprotein [Zaire ebolavirus].	AKI83972.1	824040624	676	['Guinea']	['24-May-2014']	['Ebola virus/H.sapiens-wt/GIN/2014/Makona-EM_079772']
spike glycoprotein [Zaire ebolavirus].	AKI83963.1	824040612	676	['Guinea']	['22-May-2014']	['Ebola virus/H.sapiens-wt/GIN/2014/Makona-EM_079753']
spike glycoprotein [Zaire ebolavirus].	AKI83954.1	824040600	676	['Guinea']	['21-May-2014']	['Ebola virus/H.sapiens-wt/GIN/2014/Makona-EM_079750']
spike glycoprotein [Zaire ebolavirus].	AKI83945.1	824040587	676	['Guinea']	['21-May-2014']	['Ebola virus/H.sapiens-wt/GIN/2014/Makona-EM_079749']
spike glycoprotein [Zaire ebolavirus].	AKI83936.1	824040574	676	['Guinea']	['18-May-2014']	['Ebola virus/H.sapiens-wt/GIN/2014/Makona-EM_079731']
spike glycoprotein [Zaire ebolavirus].	AKI83927.1	824040561	676	['Guinea']	['14-May-2014']	['Ebola virus/H.sapiens-wt/GIN/2014/Makona-EM_079702']
spike glycoprotein [Zaire ebolavirus].	AKI83918.1	824040548	676	['Guinea']	['11-May-2014']	['Ebola virus/H.sapiens-wt/GIN/2014/Makona-EM_079685']
spike glycoprotein [Zaire ebolavirus].	AKI83909.1	824040535	676	['Guinea']	['11-May-2014']	['Ebola virus/H.sapiens-wt/GIN/2014/Makona-EM_079681']
spike glycoprotein [Zaire ebolavirus].	AKI83900.1	824040523	676	['Guinea']	['10-May-2014']	['Ebola virus/H.sapiens-wt/GIN/2014/Makona-EM_079677']
spike glycoprotein [Zaire ebolavirus].	AKI83891.1	824040509	676	['Guinea']	['07-May-2014']	['Ebola virus/H.sapiens-wt/GIN/2014/Makona-EM_079659']
spike glycoprotein [Zaire ebolavirus].	AKI83882.1	824040497	676	['Guinea']	['07-May-2014']	['Ebola virus/H.sapiens-wt/GIN/2014/Makona-EM_079657']
spike glycoprotein [Zaire ebolavirus].	AKI83873.1	824040485	676	['Guinea']	['01-May-2014']	['Ebola virus/H.sapiens-wt/GIN/2014/Makona-EM_079630']
spike glycoprotein [Zaire ebolavirus].	AKI83864.1	824040472	676	['Guinea']	['28-Apr-2014']	['Ebola virus/H.sapiens-wt/GIN/2014/Makona-EM_079622']
spike glycoprotein [Zaire ebolavirus].	AKI83855.1	824040460	676	['Guinea']	['22-Apr-2014']	['Ebola virus/H.sapiens-wt/GIN/2014/Makona-EM_079587']
spike glycoprotein [Zaire ebolavirus].	AKI83846.1	824040447	676	['Guinea']	['18-Apr-2014']	['Ebola virus/H.sapiens-wt/GIN/2014/Makona-EM_079578']
spike glycoprotein [Zaire ebolavirus].	AKI83837.1	824040434	676	['Guinea']	['13-Apr-2014']	['Ebola virus/H.sapiens-wt/GIN/2014/Makona-EM_079549']
spike glycoprotein [Zaire ebolavirus].	AKI83828.1	824040422	676	['Guinea']	['12-Apr-2014']	['Ebola virus/H.sapiens-wt/GIN/2014/Makona-EM_079542']
spike glycoprotein [Zaire ebolavirus].	AKI83819.1	824040409	676	['Guinea']	['11-Apr-2014']	['Ebola virus/H.sapiens-wt/GIN/2014/Makona-EM_079517']
spike glycoprotein [Zaire ebolavirus].	AKI83810.1	824040396	676	['Guinea']	['10-Apr-2014']	['Ebola virus/H.sapiens-wt/GIN/2014/Makona-EM_079514']
spike glycoprotein [Zaire ebolavirus].	AKI83801.1	824040384	676	['Guinea']	['07-Apr-2014']	['Ebola virus/H.sapiens-wt/GIN/2014/Makona-EM_079497']
spike glycoprotein [Zaire ebolavirus].	AKI83792.1	824040372	676	['Guinea']	['04-Apr-2014']	['Ebola virus/H.sapiens-wt/GIN/2014/Makona-EM_079464']
spike glycoprotein [Zaire ebolavirus].	AKI83783.1	824040360	676	['Liberia']	['01-Apr-2014']	['Ebola virus/H.sapiens-wt/LBR/2014/Makona-EM_079450']
spike glycoprotein [Zaire ebolavirus].	AKI83774.1	824040347	676	['Guinea']	['02-Apr-2014']	['Ebola virus/H.sapiens-wt/GIN/2014/Makona-EM_079444']
spike glycoprotein [Zaire ebolavirus].	AKI83765.1	824040335	676	['Guinea']	['03-Apr-2014']	['Ebola virus/H.sapiens-wt/GIN/2014/Makona-EM_079442']
spike glycoprotein [Zaire ebolavirus].	AKI83756.1	824040322	676	['Guinea']	['02-Apr-2014']	['Ebola virus/H.sapiens-wt/GIN/2014/Makona-EM_079434']
spike glycoprotein [Zaire ebolavirus].	AKI83747.1	824040309	676	['Guinea']	['02-Apr-2014']	['Ebola virus/H.sapiens-wt/GIN/2014/Makona-EM_079429']
spike glycoprotein [Zaire ebolavirus].	AKI83738.1	824040296	676	['Guinea']	['27-Mar-2014']	['Ebola virus/H.sapiens-wt/GIN/2014/Makona-EM_079424']
spike glycoprotein [Zaire ebolavirus].	AKI83729.1	824040284	676	['Guinea']	['27-Mar-2014']	['Ebola virus/H.sapiens-wt/GIN/2014/Makona-EM_079423']
spike glycoprotein [Zaire ebolavirus].	AKI83720.1	824040271	676	['Guinea']	['27-Mar-2014']	['Ebola virus/H.sapiens-wt/GIN/2014/Makona-EM_079422']
spike glycoprotein [Zaire ebolavirus].	AKI83711.1	824040258	676	['Guinea']	['30-Mar-2014']	['Ebola virus/H.sapiens-wt/GIN/2014/Makona-EM_079421']
spike glycoprotein [Zaire ebolavirus].	AKI83702.1	824040246	676	['Guinea']	['31-Mar-2014']	['Ebola virus/H.sapiens-wt/GIN/2014/Makona-EM_079414']
spike glycoprotein [Zaire ebolavirus].	AKI83693.1	824040233	676	['Guinea']	['31-Mar-2014']	['Ebola virus/H.sapiens-wt/GIN/2014/Makona-EM_079413']
spike glycoprotein [Zaire ebolavirus].	AKI83684.1	824040220	676	['Guinea']	['31-Mar-2014']	['Ebola virus/H.sapiens-wt/GIN/2014/Makona-EM_079412']
spike glycoprotein [Zaire ebolavirus].	AKI83675.1	824040208	676	['Guinea']	['31-Mar-2014']	['Ebola virus/H.sapiens-wt/GIN/2014/Makona-EM_079410']
spike glycoprotein [Zaire ebolavirus].	AKI83666.1	824040194	676	['Guinea']	['31-Mar-2014']	['Ebola virus/H.sapiens-wt/GIN/2014/Makona-EM_079408']
spike glycoprotein [Zaire ebolavirus].	AKI83657.1	824040182	676	['Guinea']	['28-Mar-2014']	['Ebola virus/H.sapiens-wt/GIN/2014/Makona-EM_079405']
spike glycoprotein [Zaire ebolavirus].	AKI83648.1	824040169	676	['Guinea']	['28-Mar-2014']	['Ebola virus/H.sapiens-wt/GIN/2014/Makona-EM_079404']
spike glycoprotein [Zaire ebolavirus].	AKI83639.1	824040157	676	['Guinea']	['30-Jul-2014']	['Ebola virus/H.sapiens-wt/GIN/2014/Makona-EM_079388']
spike glycoprotein [Zaire ebolavirus].	AKI83630.1	824040145	676	['Guinea']	['18-Dec-2014']	['Ebola virus/H.sapiens-wt/GIN/2014/Makona-EM_078779']
spike glycoprotein [Zaire ebolavirus].	AKI83621.1	824040133	676	['Guinea']	['17-Dec-2014']	['Ebola virus/H.sapiens-wt/GIN/2014/Makona-EM_078763']
spike glycoprotein [Zaire ebolavirus].	AKI83612.1	824040121	676	['Guinea']	['16-Dec-2014']	['Ebola virus/H.sapiens-wt/GIN/2014/Makona-EM_078722']
spike glycoprotein [Zaire ebolavirus].	AKI83603.1	824040108	676	['Guinea']	['14-Dec-2014']	['Ebola virus/H.sapiens-wt/GIN/2014/Makona-EM_078709']
spike glycoprotein [Zaire ebolavirus].	AKI83594.1	824040096	676	['Guinea']	['15-Dec-2014']	['Ebola virus/H.sapiens-wt/GIN/2014/Makona-EM_078706']
spike glycoprotein [Zaire ebolavirus].	AKI83585.1	824040084	676	['Guinea']	['14-Dec-2014']	['Ebola virus/H.sapiens-wt/GIN/2014/Makona-EM_078697']
spike glycoprotein [Zaire ebolavirus].	AKI83576.1	824040072	676	['Guinea']	['14-Dec-2014']	['Ebola virus/H.sapiens-wt/GIN/2014/Makona-EM_078694']
spike glycoprotein [Zaire ebolavirus].	AKI83567.1	824040060	676	['Guinea']	['11-Dec-2014']	['Ebola virus/H.sapiens-wt/GIN/2014/Makona-EM_078683']
spike glycoprotein [Zaire ebolavirus].	AKI83558.1	824040047	676	['Guinea']	['11-Dec-2014']	['Ebola virus/H.sapiens-wt/GIN/2014/Makona-EM_078670']
spike glycoprotein [Zaire ebolavirus].	AKI83549.1	824040034	676	['Guinea']	['09-Dec-2014']	['Ebola virus/H.sapiens-wt/GIN/2014/Makona-EM_078656']
spike glycoprotein [Zaire ebolavirus].	AKI83540.1	824040022	676	['Guinea']	['09-Dec-2014']	['Ebola virus/H.sapiens-wt/GIN/2014/Makona-EM_078654']
spike glycoprotein [Zaire ebolavirus].	AKI83531.1	824040009	676	['Guinea']	['04-Dec-2014']	['Ebola virus/H.sapiens-wt/GIN/2014/Makona-EM_078639']
spike glycoprotein [Zaire ebolavirus].	AKI83522.1	824039997	676	['Guinea']	['03-Dec-2014']	['Ebola virus/H.sapiens-wt/GIN/2014/Makona-EM_078638']
spike glycoprotein [Zaire ebolavirus].	AKI83513.1	824039985	676	['Guinea']	['04-Dec-2014']	['Ebola virus/H.sapiens-wt/GIN/2014/Makona-EM_078608']
spike glycoprotein [Zaire ebolavirus].	AKI83504.1	824039973	676	['Guinea']	['01-Dec-2014']	['Ebola virus/H.sapiens-wt/GIN/2014/Makona-EM_078556']
spike glycoprotein [Zaire ebolavirus].	AKI83495.1	824039960	676	['Guinea']	['01-Dec-2014']	['Ebola virus/H.sapiens-wt/GIN/2014/Makona-EM_078555']
spike glycoprotein [Zaire ebolavirus].	AKI83486.1	824039947	676	['Guinea']	['24-Nov-2014']	['Ebola virus/H.sapiens-wt/GIN/2014/Makona-EM_078416']
spike glycoprotein [Zaire ebolavirus].	AKI83477.1	824039934	676	['Guinea']	['24-Nov-2014']	['Ebola virus/H.sapiens-wt/GIN/2014/Makona-EM_078415']
spike glycoprotein [Zaire ebolavirus].	AKI83468.1	824039921	676	['Guinea']	['13-Nov-2014']	['Ebola virus/H.sapiens-wt/GIN/2014/Makona-EM_076951']
spike glycoprotein [Zaire ebolavirus].	AKI83459.1	824039909	676	['Guinea']	['13-Nov-2014']	['Ebola virus/H.sapiens-wt/GIN/2014/Makona-EM_076949']
spike glycoprotein [Zaire ebolavirus].	AKI83450.1	824039895	676	['Guinea']	['13-Nov-2014']	['Ebola virus/H.sapiens-wt/GIN/2014/Makona-EM_076948']
spike glycoprotein [Zaire ebolavirus].	AKI83441.1	824039883	676	['Guinea']	['08-Nov-2014']	['Ebola virus/H.sapiens-wt/GIN/2014/Makona-EM_076770']
spike glycoprotein [Zaire ebolavirus].	AKI83432.1	824039871	676	['Guinea']	['08-Nov-2014']	['Ebola virus/H.sapiens-wt/GIN/2014/Makona-EM_076769']
spike glycoprotein [Zaire ebolavirus].	AKI83423.1	824039859	676	['Guinea']	['03-Nov-2014']	['Ebola virus/H.sapiens-wt/GIN/2014/Makona-EM_076615']
spike glycoprotein [Zaire ebolavirus].	AKI83414.1	824039846	676	['Guinea']	['03-Nov-2014']	['Ebola virus/H.sapiens-wt/GIN/2014/Makona-EM_076610']
spike glycoprotein [Zaire ebolavirus].	AKI83405.1	824039834	676	['Guinea']	['01-Nov-2014']	['Ebola virus/H.sapiens-wt/GIN/2014/Makona-EM_076534']
spike glycoprotein [Zaire ebolavirus].	AKI83396.1	824039821	676	['Guinea']	['01-Nov-2014']	['Ebola virus/H.sapiens-wt/GIN/2014/Makona-EM_076533']
spike glycoprotein [Zaire ebolavirus].	AKI83387.1	824039808	676	['Guinea']	['29-Oct-2014']	['Ebola virus/H.sapiens-wt/GIN/2014/Makona-EM_076472']
spike glycoprotein [Zaire ebolavirus].	AKI83378.1	824039796	676	['Guinea']	['27-Oct-2014']	['Ebola virus/H.sapiens-wt/GIN/2014/Makona-EM_076403']
spike glycoprotein [Zaire ebolavirus].	AKI83369.1	824039782	676	['Guinea']	['26-Oct-2014']	['Ebola virus/H.sapiens-wt/GIN/2014/Makona-EM_076383']
spike glycoprotein [Zaire ebolavirus].	AKI83360.1	824039769	676	['Guinea']	['23-Oct-2014']	['Ebola virus/H.sapiens-wt/GIN/2014/Makona-EM_076335']
spike glycoprotein [Zaire ebolavirus].	AKI83351.1	824039757	676	['Guinea']	['23-Oct-2014']	['Ebola virus/H.sapiens-wt/GIN/2014/Makona-EM_076334']
spike glycoprotein [Zaire ebolavirus].	AKI83342.1	824039743	676	['Guinea']	['22-Oct-2014']	['Ebola virus/H.sapiens-wt/GIN/2014/Makona-EM_076322']
spike glycoprotein [Zaire ebolavirus].	AKI83333.1	824039729	676	['Guinea']	['19-Oct-2014']	['Ebola virus/H.sapiens-wt/GIN/2014/Makona-EM_076217']
spike glycoprotein [Zaire ebolavirus].	AKI83324.1	824039717	676	['Guinea']	['18-Oct-2014']	['Ebola virus/H.sapiens-wt/GIN/2014/Makona-EM_076193']
spike glycoprotein [Zaire ebolavirus].	AKI83315.1	824039705	676	['Guinea']	['18-Oct-2014']	['Ebola virus/H.sapiens-wt/GIN/2014/Makona-EM_076192']
spike glycoprotein [Zaire ebolavirus].	AKI83306.1	824039692	676	['Guinea']	['18-Oct-2014']	['Ebola virus/H.sapiens-wt/GIN/2014/Makona-EM_076191']
spike glycoprotein [Zaire ebolavirus].	AKI83297.1	824039680	676	['Guinea']	['17-Oct-2014']	['Ebola virus/H.sapiens-wt/GIN/2014/Makona-EM_076138']
spike glycoprotein [Zaire ebolavirus].	AKI83288.1	824039667	676	['Guinea']	['10-Oct-2014']	['Ebola virus/H.sapiens-wt/GIN/2014/Makona-EM_075932']
spike glycoprotein [Zaire ebolavirus].	AKI83279.1	824039654	676	['Guinea']	['10-Oct-2014']	['Ebola virus/H.sapiens-wt/GIN/2014/Makona-EM_075931']
spike glycoprotein [Zaire ebolavirus].	AKI83270.1	824039642	676	['Guinea']	['10-Oct-2014']	['Ebola virus/H.sapiens-wt/GIN/2014/Makona-EM_075930']
spike glycoprotein [Zaire ebolavirus].	AKI83261.1	824039630	676	['Guinea']	['10-Oct-2014']	['Ebola virus/H.sapiens-wt/GIN/2014/Makona-EM_075929']
spike glycoprotein [Zaire ebolavirus].	AKI83252.1	824039617	676	['Guinea']	['10-Oct-2014']	['Ebola virus/H.sapiens-wt/GIN/2014/Makona-EM_075928']
spike glycoprotein [Zaire ebolavirus].	AKI83243.1	824039605	676	['Guinea']	['31-Aug-2014']	['Ebola virus/H.sapiens-wt/GIN/2014/Makona-EM_075447']
spike glycoprotein [Zaire ebolavirus].	AKI83234.1	824039593	676	['Guinea']	['30-Aug-2014']	['Ebola virus/H.sapiens-wt/GIN/2014/Makona-EM_075435']
spike glycoprotein [Zaire ebolavirus].	AKI83225.1	824039580	676	['Guinea']	['30-Aug-2014']	['Ebola virus/H.sapiens-wt/GIN/2014/Makona-EM_075373']
spike glycoprotein [Zaire ebolavirus].	AKI83216.1	824039567	676	['Guinea']	['29-Aug-2014']	['Ebola virus/H.sapiens-wt/GIN/2014/Makona-EM_075368']
spike glycoprotein [Zaire ebolavirus].	AKI83207.1	824039554	676	['Guinea']	['23-Aug-2014']	['Ebola virus/H.sapiens-wt/GIN/2014/Makona-EM_075076']
spike glycoprotein [Zaire ebolavirus].	AKI83198.1	824039542	676	['Liberia']	['22-Aug-2014']	['Ebola virus/H.sapiens-wt/LBR/2014/Makona-EM_075043']
spike glycoprotein [Zaire ebolavirus].	AKI83189.1	824039529	676	['Liberia']	['17-Aug-2014']	['Ebola virus/H.sapiens-wt/LBR/2014/Makona-EM_074822']
spike glycoprotein [Zaire ebolavirus].	AKI83180.1	824039517	676	['Liberia']	['17-Aug-2014']	['Ebola virus/H.sapiens-wt/LBR/2014/Makona-EM_074821']
spike glycoprotein [Zaire ebolavirus].	AKI83171.1	824039505	676	['Guinea']	['16-Aug-2014']	['Ebola virus/H.sapiens-wt/GIN/2014/Makona-EM_074785']
spike glycoprotein [Zaire ebolavirus].	AKI83162.1	824039492	676	['Liberia']	['14-Aug-2014']	['Ebola virus/H.sapiens-wt/LBR/2014/Makona-EM_074720']
spike glycoprotein [Zaire ebolavirus].	AKI83153.1	824039479	676	['Guinea']	['14-Aug-2014']	['Ebola virus/H.sapiens-wt/GIN/2014/Makona-EM_074684']
spike glycoprotein [Zaire ebolavirus].	AKI83144.1	824039465	676	['Liberia']	['08-Aug-2014']	['Ebola virus/H.sapiens-wt/LBR/2014/Makona-EM_074548']
spike glycoprotein [Zaire ebolavirus].	AKI83135.1	824039452	676	['Guinea']	['08-Aug-2014']	['Ebola virus/H.sapiens-wt/GIN/2014/Makona-EM_074531']
spike glycoprotein [Zaire ebolavirus].	AKI83126.1	824039440	676	['Guinea']	['04-Aug-2014']	['Ebola virus/H.sapiens-wt/GIN/2014/Makona-EM_074462']
spike glycoprotein [Zaire ebolavirus].	AKI83117.1	824039427	676	['Guinea']	['04-Aug-2014']	['Ebola virus/H.sapiens-wt/GIN/2014/Makona-EM_074461']
spike glycoprotein [Zaire ebolavirus].	AKI83108.1	824039415	676	['Guinea']	['01-Aug-2014']	['Ebola virus/H.sapiens-wt/GIN/2014/Makona-EM_074439']
spike glycoprotein [Zaire ebolavirus].	AKI83099.1	824039403	676	['Guinea']	['01-Aug-2014']	['Ebola virus/H.sapiens-wt/GIN/2014/Makona-EM_074438']
spike glycoprotein [Zaire ebolavirus].	AKI83090.1	824039391	676	['Guinea']	['01-Aug-2014']	['Ebola virus/H.sapiens-wt/GIN/2014/Makona-EM_074437']
spike glycoprotein [Zaire ebolavirus].	AKI83081.1	824039379	676	['Guinea']	['01-Aug-2014']	['Ebola virus/H.sapiens-wt/GIN/2014/Makona-EM_074436']
spike glycoprotein [Zaire ebolavirus].	AKI83072.1	824039366	676	['Liberia']	['25-Jul-2014']	['Ebola virus/H.sapiens-wt/LBR/2014/Makona-EM_074392']
spike glycoprotein [Zaire ebolavirus].	AKI83063.1	824039354	676	['Liberia']	['26-Jul-2014']	['Ebola virus/H.sapiens-wt/LBR/2014/Makona-EM_074391']
spike glycoprotein [Zaire ebolavirus].	AKI83054.1	824039342	676	['Guinea']	['22-Jul-2014']	['Ebola virus/H.sapiens-wt/GIN/2014/Makona-EM_074354']
spike glycoprotein [Zaire ebolavirus].	AKI83045.1	824039329	676	['Liberia']	['22-Jul-2014']	['Ebola virus/H.sapiens-wt/LBR/2014/Makona-EM_074353']
spike glycoprotein [Zaire ebolavirus].	AKI83036.1	824039317	676	['Liberia']	['22-Jul-2014']	['Ebola virus/H.sapiens-wt/LBR/2014/Makona-EM_074352']
spike glycoprotein [Zaire ebolavirus].	AKI83027.1	824039304	676	['Liberia']	['22-Jul-2014']	['Ebola virus/H.sapiens-wt/LBR/2014/Makona-EM_074351']
spike glycoprotein [Zaire ebolavirus].	AKI83018.1	824039292	676	['Liberia']	['22-Jul-2014']	['Ebola virus/H.sapiens-wt/LBR/2014/Makona-EM_074350']
spike glycoprotein [Zaire ebolavirus].	AKI83009.1	824039280	676	['Liberia']	['22-Jul-2014']	['Ebola virus/H.sapiens-wt/LBR/2014/Makona-EM_074349']
spike glycoprotein [Zaire ebolavirus].	AKI83000.1	824039268	676	['Guinea']	['18-Jul-2014']	['Ebola virus/H.sapiens-wt/GIN/2014/Makona-EM_074335']
spike glycoprotein [Zaire ebolavirus].	AKI82991.1	824039255	676	['Guinea']	['31-Jan-2015']	['Ebola virus/H.sapiens-wt/GIN/2015/Makona-EM_004589']
spike glycoprotein [Zaire ebolavirus].	AKI82982.1	824039243	676	['Guinea']	['27-Jan-2015']	['Ebola virus/H.sapiens-wt/GIN/2015/Makona-EM_004580']
spike glycoprotein [Zaire ebolavirus].	AKI82973.1	824039231	676	['Guinea']	['25-Jan-2015']	['Ebola virus/H.sapiens-wt/GIN/2015/Makona-EM_004563']
spike glycoprotein [Zaire ebolavirus].	AKI82964.1	824039219	676	['Guinea']	['22-Jan-2015']	['Ebola virus/H.sapiens-wt/GIN/2015/Makona-EM_004555']
spike glycoprotein [Zaire ebolavirus].	AKI82955.1	824039207	676	['Guinea']	['15-Jan-2015']	['Ebola virus/H.sapiens-wt/GIN/2015/Makona-EM_004503']
spike glycoprotein [Zaire ebolavirus].	AKI82946.1	824039195	676	['Guinea']	['14-Jan-2015']	['Ebola virus/H.sapiens-wt/GIN/2015/Makona-EM_004494']
spike glycoprotein [Zaire ebolavirus].	AKI82937.1	824039183	676	['Guinea']	['11-Jan-2015']	['Ebola virus/H.sapiens-wt/GIN/2015/Makona-EM_004481']
spike glycoprotein [Zaire ebolavirus].	AKI82928.1	824039171	676	['Guinea']	['04-Jan-2015']	['Ebola virus/H.sapiens-wt/GIN/2015/Makona-EM_004438']
spike glycoprotein [Zaire ebolavirus].	AKI82919.1	824039159	676	['Guinea']	['04-Jan-2015']	['Ebola virus/H.sapiens-wt/GIN/2015/Makona-EM_004437']
spike glycoprotein [Zaire ebolavirus].	AKI82910.1	824039146	676	['Guinea']	['02-Jan-2015']	['Ebola virus/H.sapiens-wt/GIN/2015/Makona-EM_004422']
spike glycoprotein [Zaire ebolavirus].	AKI82901.1	824039134	676	['Guinea']	['02-Jan-2015']	['Ebola virus/H.sapiens-wt/GIN/2015/Makona-EM_004414']
spike glycoprotein [Zaire ebolavirus].	AKI82892.1	824039122	676	['Guinea']	['27-Dec-2014']	['Ebola virus/H.sapiens-wt/GIN/2014/Makona-EM_004290']
spike glycoprotein [Zaire ebolavirus].	AKI82883.1	824039110	676	['Guinea']	['26-Dec-2014']	['Ebola virus/H.sapiens-wt/GIN/2014/Makona-EM_004259']
spike glycoprotein [Zaire ebolavirus].	AKI82874.1	824039097	676	['Guinea']	['24-Dec-2014']	['Ebola virus/H.sapiens-wt/GIN/2014/Makona-EM_004201']
spike glycoprotein [Zaire ebolavirus].	AKI82865.1	824039084	676	['Guinea']	['22-Dec-2014']	['Ebola virus/H.sapiens-wt/GIN/2014/Makona-EM_004192']
spike glycoprotein [Zaire ebolavirus].	AKI82856.1	824039071	676	['Guinea']	['19-Dec-2014']	['Ebola virus/H.sapiens-wt/GIN/2014/Makona-EM_004085']
spike glycoprotein [Zaire ebolavirus].	AKI82847.1	824039059	676	['Guinea']	['20-Dec-2014']	['Ebola virus/H.sapiens-wt/GIN/2014/Makona-EM_004059']
spike glycoprotein [Zaire ebolavirus].	AKI82838.1	824039046	676	['Guinea']	['05-Oct-2014']	['Ebola virus/H.sapiens-wt/GIN/2014/Makona-EM_001102']
spike glycoprotein [Zaire ebolavirus].	AKI82829.1	824039034	676	['Guinea']	['05-Oct-2014']	['Ebola virus/H.sapiens-wt/GIN/2014/Makona-EM_001101']
spike glycoprotein [Zaire ebolavirus].	AKI82820.1	824039021	676	['Guinea']	['01-Oct-2014']	['Ebola virus/H.sapiens-wt/GIN/2014/Makona-EM_000983']
[truncated: 441 more rows]

## Sheet: 193 EBOV variants
full-length/nonRedundantGP.accession
AAA96744.1
AAB37093.1
[truncated: 191 more rows]
